# Supplementary material for: Mesoporous metal oxide nanoparticles for selective enrichment of phosphopeptides from complex sample matrices
Source: Royal Society of Chemistry journal article supplement (doi:10.1039/c6ay02069k), 2016-01-01
Supplement: c6ay02069k1.xlsx [file c6ay02069k1.xlsx]

## Sheet: ZnSn(OH)6 phosphopeptides
protein accession	protein name	Peptide Sequence	Variable Modifications	Localization Probability	Ascore	Peptide Score	Scaffold:Peptide Probability	Mascot:Score	Mascot:Identity Threshold	NTT	Actual Mass	Observed Mass	Charge	Delta AMU	Delta PPM	Start	Stop
AT3G13570.1	| Symbols: SCL30A, At-SCL30A | SC35-like splicing factor 30A | chr3:4429564-4431602 REVERSE LENGTH=262	QsRsPtPVPR	S2 Phospho, S4 Phospho, T6 Phospho	100%, 100%, 100%	1,000.00, 1,000.00, 1,000.00	72.34	0.9316	6.64	27.46	2	1363.51	682.764	2	0.00533	3.9	242	251
AT5G21160.2	| Symbols: | LA RNA-binding protein | chr5:7198817-7203879 REVERSE LENGTH=832	LssSPQcTLSGSSPPVGsLPK	S2 Phospho, S3 Phospho, S18 Phospho	29%, 29%, 99%	0.00, 0.00, 23.20	56	0.9416	13.14	31.47	2	2324.95	1163.48	2	0.0134	5.77	632	652
AT1G31360.1	| Symbols: RECQL2, ATRECQ2, MED34 | RECQ helicase L2 | chr1:11232422-11237412 FORWARD LENGTH=705	ILyVtPEKVsK	Y3 Phospho, T5 Phospho, S10 Phospho	100%, 100%, 100%	1,000.00, 1,000.00, 1,000.00	74.39	0.988	11.53	30	2	1515.65	758.833	2	0.00811	5.35	184	194
AT5G42480.1	| Symbols: ARC6 | Chaperone DnaJ-domain superfamily protein | chr5:16985295-16988332 FORWARD LENGTH=801	AsAMQALQKVFPsRyTDR	S2 Phospho, S13 Phospho, Y15 Phospho	67%, 99%, 67%	0.00, 14.71, 0.08	35.97	0.9441	19.61	32.63	2	2308	770.339	3	0.0439	19	524	541
AT2G37340.2	| Symbols: RSZ33, RS2Z33, AT-RS2Z33 | arginine/serine-rich zinc knuckle-containing protein 33 | chr2:15670372-15671477 REVERSE LENGTH=260	mDDsLsPR	M1 Oxidation, S4 Phospho, S6 Phospho	100%, 100%, 100%	1,000.00, 1,000.00, 1,000.00	151.05	0.99	31.49	25	2	1095.34	548.677	2	0.00414	3.78	169	176
AT2G37340.2	| Symbols: RSZ33, RS2Z33, AT-RS2Z33 | arginine/serine-rich zinc knuckle-containing protein 33 | chr2:15670372-15671477 REVERSE LENGTH=260	RmDDsLsPR	M2 Oxidation, S5 Phospho, S7 Phospho	100%, 100%, 100%	1,000.00, 1,000.00, 1,000.00	76.65	0.966	13.36	25.13	2	1251.44	626.727	2	0.0029	2.32	168	176
AT2G46630.1	| Symbols: | unknown protein; LOCATED IN: chloroplast; EXPRESSED IN: 22 plant structures; EXPRESSED DURING: 13 growth stages; Has 110095 Blast hits to 59224 proteins in 2216 species: Archae - 177; Bacteria - 15429; Metazoa - 38345; Fungi - 18843; Plants - 13341; Viruses - 3084; Other Eukaryotes - 20876 (source: NCBI BLink). | chr2:19145529-19146713 FORWARD LENGTH=394	HmsPPtPPK	M2 Oxidation, S3 Phospho, T6 Phospho	100%, 100%, 100%	1,000.00, 1,000.00, 1,000.00	102.33	0.9989	14.82	26.29	2	1166.43	584.222	2	0.00526	4.51	100	108
AT5G20280.1	| Symbols: ATSPS1F, SPS1F | sucrose phosphate synthase 1F | chr5:6844994-6849997 REVERSE LENGTH=1043	INsAEsmELWASQQK	S3 Phospho, S6 Phospho, M7 Oxidation	100%, 100%, 100%	72.84, 78.53, 1,000.00	93.57	0.9353	6.76	30.01	2	1896.74	949.379	2	0.00668	3.52	150	164
AT3G13300.2	| Symbols: VCS | Transducin/WD40 repeat-like superfamily protein | chr3:4304085-4309949 FORWARD LENGTH=1309	VFcSQVsNLsTEmAR	S7 Phospho, S10 Phospho, M13 Oxidation	100%, 100%, 100%	66.42, 24.95, 1,000.00	230.16	0.999	44.75	29.74	2	1903.73	952.873	2	0.00686	3.6	786	800
AT2G46020.2	| Symbols: CHR2, ATBRM, BRM, CHA2 | transcription regulatory protein SNF2, putative | chr2:18923304-18931769 FORWARD LENGTH=2193	TGGSSsPVsPPPAmIGR	S6 Phospho, S9 Phospho, M14 Oxidation	40%, 40%, 100%	0.00, 0.00, 1,000.00	111.63	0.995	30.13	30.45	2	1772.72	887.37	2	0.004	2.26	2117	2133
AT2G46020.2	| Symbols: CHR2, ATBRM, BRM, CHA2 | transcription regulatory protein SNF2, putative | chr2:18923304-18931769 FORWARD LENGTH=2193	TGGSsSPVsPPPAmIGR	S5 Phospho, S9 Phospho, M14 Oxidation	33%, 100%, 100%	0.00, 50.19, 1,000.00	146.73	0.9982	32.99	30.46	2	1772.73	887.37	2	0.0056	3.16	2117	2133
AT1G35580.2	| Symbols: CINV1 | cytosolic invertase 1 | chr1:13122460-13124808 REVERSE LENGTH=551	smSELStGYSR	S1 Phospho, M2 Oxidation, T7 Phospho	100%, 100%, 32%	34.98, 1,000.00, 0.00	54.12	0.9206	13.63	25.67	2	1392.47	697.242	2	0.00252	1.81	44	54
AT1G35580.2	| Symbols: CINV1 | cytosolic invertase 1 | chr1:13122460-13124808 REVERSE LENGTH=551	smSELsTGYSR	S1 Phospho, M2 Oxidation, S6 Phospho	100%, 100%, 99%	43.29, 1,000.00, 22.52	92.84	0.9959	19.65	25.67	2	1392.47	697.244	2	0.0065	4.67	44	54
AT4G30160.1	| Symbols: VLN4, ATVLN4 | villin 4 | chr4:14754528-14759511 FORWARD LENGTH=974	SmsFsPDR	M2 Oxidation, S3 Phospho, S5 Phospho	100%, 100%, 100%	1,000.00, 46.21, 39.54	62.7	0.99	17.31	25	2	1101.33	551.672	2	0.00504	4.57	773	780
AT2G17290.1	| Symbols: CPK6, ATCDPK3, ATCPK6 | Calcium-dependent protein kinase family protein | chr2:7517005-7519239 FORWARD LENGTH=544	NsLNIsmR	S2 Phospho, S6 Phospho, M7 Oxidation	100%, 100%, 100%	1,000.00, 1,000.00, 1,000.00	67.5	0.99	17.27	26.11	2	1109.4	555.708	2	0.00426	3.84	535	542
AT2G43790.1	| Symbols: ATMPK6, MPK6, MAPK6, ATMAPK6 | MAP kinase 6 | chr2:18138477-18140693 FORWARD LENGTH=395	VTSESDFmtEyVVTR	M8 Oxidation, T9 Phospho, Y11 Phospho	100%, 100%, 100%	1,000.00, 23.20, 74.63	122.92	0.9989	24.53	29.56	2	1938.74	970.38	2	0.0089	4.59	213	227
AT1G28330.2	| Symbols: DYL1 | dormancy-associated protein-like 1 | chr1:9934500-9935216 REVERSE LENGTH=132	SLtmPAAVsPGTPTTPTTPTTPR	T3 Phospho, M4 Oxidation, S9 Phospho	32%, 100%, 32%	0.00, 1,000.00, 0.00	77.51	0.9887	14.26	33.04	2	2457.1	820.04	3	0.00633	2.57	50	72
AT1G28330.2	| Symbols: DYL1 | dormancy-associated protein-like 1 | chr1:9934500-9935216 REVERSE LENGTH=132	sLTmPAAVSPGTPTTPTTPTtPR	S1 Phospho, M4 Oxidation, T21 Phospho	20%, 100%, 20%	0.00, 1,000.00, 0.00	82.82	0.9928	17.65	33.07	2	2457.1	820.041	3	0.01	4.09	50	72
AT1G36310.1	| Symbols: | S-adenosyl-L-methionine-dependent methyltransferases superfamily protein | chr1:13669644-13670934 FORWARD LENGTH=404	YVEEWVGPGsPmNsPR	S10 Phospho, M12 Oxidation, S14 Phospho	100%, 100%, 100%	89.06, 1,000.00, 106.73	105.08	0.994	12.94	31.47	2	1979.76	990.889	2	0.0104	5.24	225	240
AT5G04430.2	| Symbols: BTR1, BTR1L | binding to TOMV RNA 1L (long form) | chr5:1250602-1253523 REVERSE LENGTH=334	mEStESYAAGsPEELAK	M1 Oxidation, T4 Phospho, S11 Phospho	100%, 49%, 100%	1,000.00, 0.00, 91.35	154.26	0.9937	41.49	28.86	2	1974.72	659.248	3	1.71e-05	0.00863	1	17
AT5G04430.2	| Symbols: BTR1, BTR1L | binding to TOMV RNA 1L (long form) | chr5:1250602-1253523 REVERSE LENGTH=334	mESTESyAAGsPEELAK	M1 Oxidation, Y7 Phospho, S11 Phospho	100%, 25%, 100%	1,000.00, 0.00, 57.82	74.78	0.9357	17.09	28.86	2	1974.72	659.248	3	1.71e-05	0.00863	1	17
AT1G33990.1	| Symbols: ATMES14, MES14 | methyl esterase 14 | chr1:12355909-12357894 FORWARD LENGTH=348	ALsmAIHQAQLsQR	S3 Phospho, M4 Oxidation, S12 Phospho	100%, 100%, 100%	1,000.00, 1,000.00, 1,000.00	46.22	0.9995	26.4	30.9	2	1728.75	865.382	2	0.00754	4.36	44	57
AT2G19520.1	| Symbols: FVE, ACG1, MSI4, NFC4, NFC04, ATMSI4 | Transducin family protein / WD-40 repeat family protein | chr2:8456006-8459235 FORWARD LENGTH=507	mEsDEAAAVsPQATTPSGGTGASGPK	M1 Oxidation, S3 Phospho, S10 Phospho	100%, 100%, 100%	1,000.00, 70.97, 94.68	153.81	1	47.34	31.27	2	2578.99	860.672	3	-0.0197	-7.64	1	26
AT1G77180.2	| Symbols: SKIP | chromatin protein family | chr1:28999791-29001632 REVERSE LENGTH=613	ASGsPPVPVmHsPPRPVTVK	S4 Phospho, M10 Oxidation, S12 Phospho	99%, 100%, 100%	22.53, 1,000.00, 45.70	104.09	0.953	14.24	32.44	2	2215.03	739.352	3	0.00765	3.45	232	251
AT2G31010.1	| Symbols: | Protein kinase superfamily protein | chr2:13194939-13199642 FORWARD LENGTH=775	tASSSPEHPsmR	T1 Phospho, S10 Phospho, M11 Oxidation	40%, 40%, 100%	0.00, 0.00, 1,000.00	14.42	0.9684	21.8	27.57	2	1461.53	731.771	2	0.0275	18.8	357	368
AT1G31870.2	| Symbols: | unknown protein; FUNCTIONS IN: molecular_function unknown; INVOLVED IN: biological_process unknown; LOCATED IN: cytosol, nucleus; EXPRESSED IN: 25 plant structures; EXPRESSED DURING: 15 growth stages; CONTAINS InterPro DOMAIN/s: Protein of unknown function DUF2050, pre-mRNA-splicing factor (InterPro:IPR018609); Has 35333 Blast hits to 34131 proteins in 2444 species: Archae - 798; Bac…	YLsEDLsPPR	S3 Phospho, S7 Phospho	100%, 100%	54.16, 102.06	113.41	0.997	24.28	27.94	2	1335.52	668.77	2	0.00976	7.3	198	207
AT1G31870.2	| Symbols: | unknown protein; FUNCTIONS IN: molecular_function unknown; INVOLVED IN: biological_process unknown; LOCATED IN: cytosol, nucleus; EXPRESSED IN: 25 plant structures; EXPRESSED DURING: 15 growth stages; CONTAINS InterPro DOMAIN/s: Protein of unknown function DUF2050, pre-mRNA-splicing factor (InterPro:IPR018609); Has 35333 Blast hits to 34131 proteins in 2444 species: Archae - 798; Bac…	YHsPsPEPAR	S3 Phospho, S5 Phospho	100%, 100%	60.18, 117.47	141.84	0.9884	16.87	26.97	2	1299.47	650.744	2	0.0039	3	264	273
AT1G31870.2	| Symbols: | unknown protein; FUNCTIONS IN: molecular_function unknown; INVOLVED IN: biological_process unknown; LOCATED IN: cytosol, nucleus; EXPRESSED IN: 25 plant structures; EXPRESSED DURING: 15 growth stages; CONTAINS InterPro DOMAIN/s: Protein of unknown function DUF2050, pre-mRNA-splicing factor (InterPro:IPR018609); Has 35333 Blast hits to 34131 proteins in 2444 species: Archae - 798; Bac…	NDsPsPEPEAK	S3 Phospho, S5 Phospho	100%, 100%	1,000.00, 1,000.00	117.7	0.9989	16.25	26.32	2	1329.46	665.736	2	0.00494	3.71	187	197
AT1G31870.2	| Symbols: | unknown protein; FUNCTIONS IN: molecular_function unknown; INVOLVED IN: biological_process unknown; LOCATED IN: cytosol, nucleus; EXPRESSED IN: 25 plant structures; EXPRESSED DURING: 15 growth stages; CONTAINS InterPro DOMAIN/s: Protein of unknown function DUF2050, pre-mRNA-splicing factor (InterPro:IPR018609); Has 35333 Blast hits to 34131 proteins in 2444 species: Archae - 798; Bac…	TRNDsPsPEPGPR	S5 Phospho, S7 Phospho	100%, 100%	43.97, 64.24	154.14	0.9933	18.83	28.63	2	1568.61	785.311	2	0.0054	3.44	124	136
AT1G31870.2	| Symbols: | unknown protein; FUNCTIONS IN: molecular_function unknown; INVOLVED IN: biological_process unknown; LOCATED IN: cytosol, nucleus; EXPRESSED IN: 25 plant structures; EXPRESSED DURING: 15 growth stages; CONTAINS InterPro DOMAIN/s: Protein of unknown function DUF2050, pre-mRNA-splicing factor (InterPro:IPR018609); Has 35333 Blast hits to 34131 proteins in 2444 species: Archae - 798; Bac…	NDsPsPEPGPR	S3 Phospho, S5 Phospho	100%, 100%	1,000.00, 1,000.00	138.31	0.9993	26.9	25.15	2	1311.46	656.736	2	0.00324	2.47	126	136
AT1G31870.2	| Symbols: | unknown protein; FUNCTIONS IN: molecular_function unknown; INVOLVED IN: biological_process unknown; LOCATED IN: cytosol, nucleus; EXPRESSED IN: 25 plant structures; EXPRESSED DURING: 15 growth stages; CONTAINS InterPro DOMAIN/s: Protein of unknown function DUF2050, pre-mRNA-splicing factor (InterPro:IPR018609); Has 35333 Blast hits to 34131 proteins in 2444 species: Archae - 798; Bac…	yHSPsPEPAR	Y1 Phospho, S5 Phospho	0%, 100%	0.00, 117.47	164.89	0.9924	18.46	26.97	2	1299.47	650.744	2	0.0045	3.46	264	273
AT5G39570.1	| Symbols: | FUNCTIONS IN: molecular_function unknown; INVOLVED IN: biological_process unknown; LOCATED IN: cytosol, nucleus; EXPRESSED IN: 25 plant structures; EXPRESSED DURING: 14 growth stages; BEST Arabidopsis thaliana protein match is: glycine-rich protein (TAIR:AT3G29075.1); Has 30201 Blast hits to 17322 proteins in 780 species: Archae - 12; Bacteria - 1396; Metazoa - 17338; Fungi - 3422; P…	SGsGDDEEGsYGR	S3 Phospho, S10 Phospho	98%, 99%	20.19, 21.95	37.57	0.9964	30.61	25	2	1474.43	738.225	2	0.00608	4.12	337	349
AT4G15545.1	| Symbols: | unknown protein; BEST Arabidopsis thaliana protein match is: unknown protein (TAIR:AT1G16520.1); Has 30201 Blast hits to 17322 proteins in 780 species: Archae - 12; Bacteria - 1396; Metazoa - 17338; Fungi - 3422; Plants - 5037; Viruses - 0; Other Eukaryotes - 2996 (source: NCBI BLink). | chr4:8875932-8877567 FORWARD LENGTH=337	LtPPGsPPILSASGTPK	T2 Phospho, S6 Phospho	100%, 100%	77.06, 63.12	137.2	1	47.28	31.65	2	1778.84	890.425	2	0.00906	5.09	212	228
AT4G15545.1	| Symbols: | unknown protein; BEST Arabidopsis thaliana protein match is: unknown protein (TAIR:AT1G16520.1); Has 30201 Blast hits to 17322 proteins in 780 species: Archae - 12; Bacteria - 1396; Metazoa - 17338; Fungi - 3422; Plants - 5037; Viruses - 0; Other Eukaryotes - 2996 (source: NCBI BLink). | chr4:8875932-8877567 FORWARD LENGTH=337	LTPPGsPPILSASGtPK	S6 Phospho, T15 Phospho	100%, 33%	41.47, 0.00	106.78	0.9942	19.8	31.58	2	1778.83	890.423	2	0.00536	3.01	212	228
AT4G15545.1	| Symbols: | unknown protein; BEST Arabidopsis thaliana protein match is: unknown protein (TAIR:AT1G16520.1); Has 30201 Blast hits to 17322 proteins in 780 species: Archae - 12; Bacteria - 1396; Metazoa - 17338; Fungi - 3422; Plants - 5037; Viruses - 0; Other Eukaryotes - 2996 (source: NCBI BLink). | chr4:8875932-8877567 FORWARD LENGTH=337	TTsRPIsPR	S3 Phospho, S7 Phospho	99%, 100%	23.20, 93.29	108.28	0.9881	17.41	29.18	2	1173.5	587.757	2	0.00412	3.51	229	237
AT4G15545.1	| Symbols: | unknown protein; BEST Arabidopsis thaliana protein match is: unknown protein (TAIR:AT1G16520.1); Has 30201 Blast hits to 17322 proteins in 780 species: Archae - 12; Bacteria - 1396; Metazoa - 17338; Fungi - 3422; Plants - 5037; Viruses - 0; Other Eukaryotes - 2996 (source: NCBI BLink). | chr4:8875932-8877567 FORWARD LENGTH=337	LtPPGSPPILSASGtPK	T2 Phospho, T15 Phospho	50%, 50%	0.00, 0.00	94.93	0.987	18.42	31.65	2	1778.84	890.425	2	0.00908	5.1	212	228
AT4G15545.1	| Symbols: | unknown protein; BEST Arabidopsis thaliana protein match is: unknown protein (TAIR:AT1G16520.1); Has 30201 Blast hits to 17322 proteins in 780 species: Archae - 12; Bacteria - 1396; Metazoa - 17338; Fungi - 3422; Plants - 5037; Viruses - 0; Other Eukaryotes - 2996 (source: NCBI BLink). | chr4:8875932-8877567 FORWARD LENGTH=337	TtSRPIsPR	T2 Phospho, S7 Phospho	33%, 100%	0.00, 39.42	65.68	0.947	11.77	29.14	2	1173.5	587.757	2	0.00516	4.39	229	237
AT2G37340.2	| Symbols: RSZ33, RS2Z33, AT-RS2Z33 | arginine/serine-rich zinc knuckle-containing protein 33 | chr2:15670372-15671477 REVERSE LENGTH=260	IIDGsPPPsPK	S5 Phospho, S9 Phospho	100%, 100%	1,000.00, 1,000.00	194.55	1	38.04	29.07	2	1266.53	634.272	2	-0.000942	-0.743	192	202
AT2G37340.2	| Symbols: RSZ33, RS2Z33, AT-RS2Z33 | arginine/serine-rich zinc knuckle-containing protein 33 | chr2:15670372-15671477 REVERSE LENGTH=260	DRsPVLDDEGsPK	S3 Phospho, S11 Phospho	100%, 100%	1,000.00, 1,000.00	255.95	0.9994	29.92	28.95	2	1573.61	787.812	2	0.00324	2.06	179	191
AT2G37340.2	| Symbols: RSZ33, RS2Z33, AT-RS2Z33 | arginine/serine-rich zinc knuckle-containing protein 33 | chr2:15670372-15671477 REVERSE LENGTH=260	NSVVsPVVGAGGDSsK	S5 Phospho, S15 Phospho	100%, 50%	70.88, 0.00	128.01	0.9799	17.06	30.39	2	1618.67	810.341	2	0.00364	2.25	222	237
AT3G55460.1	| Symbols: SCL30, At-SCL30 | SC35-like splicing factor 30 | chr3:20561024-20563502 FORWARD LENGTH=262	RYSPPyYsPPR	Y6 Phospho, S8 Phospho	25%, 25%	0.00, 0.00	125.6	0.9968	25.33	29.61	2	1541.62	771.816	2	0.0063	4.08	3	13
AT3G55460.1	| Symbols: SCL30, At-SCL30 | SC35-like splicing factor 30 | chr3:20561024-20563502 FORWARD LENGTH=262	RYsPPYYsPPR	S3 Phospho, S8 Phospho	40%, 40%	0.00, 0.00	67.79	0.9545	9.53	29.62	2	1541.62	771.816	2	0.00596	3.86	3	13
AT3G55460.1	| Symbols: SCL30, At-SCL30 | SC35-like splicing factor 30 | chr3:20561024-20563502 FORWARD LENGTH=262	SRsYsPAPR	S3 Phospho, S5 Phospho	0%, 99%	0.00, 24.95	100.53	0.9978	20.27	27.14	2	1179.45	590.733	2	0.00396	3.35	178	186
AT3G55460.1	| Symbols: SCL30, At-SCL30 | SC35-like splicing factor 30 | chr3:20561024-20563502 FORWARD LENGTH=262	sYsPGYEGAAAAAPDR	S1 Phospho, S3 Phospho	50%, 100%	0.00, 24.44	264.74	0.9988	72.42	27.67	2	1741.65	871.83	2	0.00654	3.75	204	219
AT3G55460.1	| Symbols: SCL30, At-SCL30 | SC35-like splicing factor 30 | chr3:20561024-20563502 FORWARD LENGTH=262	SysPGYEGAAAAAPDR	Y2 Phospho, S3 Phospho	50%, 100%	0.00, 21.44	243.14	0.9979	68	28.01	2	1741.65	871.831	2	0.00978	5.61	204	219
AT3G55460.1	| Symbols: SCL30, At-SCL30 | SC35-like splicing factor 30 | chr3:20561024-20563502 FORWARD LENGTH=262	YsPPYYsPPR	S2 Phospho, S7 Phospho	25%, 99%	0.00, 21.95	87.29	0.9938	24.48	28.03	2	1385.52	693.766	2	0.00828	5.97	4	13
AT3G55460.1	| Symbols: SCL30, At-SCL30 | SC35-like splicing factor 30 | chr3:20561024-20563502 FORWARD LENGTH=262	sySPGYEGAAAAAPDR	S1 Phospho, Y2 Phospho	50%, 50%	0.00, 0.00	243.23	0.9987	66.29	27.61	2	1741.64	871.829	2	0.00468	2.68	204	219
AT3G55460.1	| Symbols: SCL30, At-SCL30 | SC35-like splicing factor 30 | chr3:20561024-20563502 FORWARD LENGTH=262	RSysPGYEGAAAAAPDR	Y3 Phospho, S4 Phospho	66%, 66%	0.00, 0.00	92.57	0.9934	19.3	30.25	2	1897.75	949.882	2	0.00922	4.85	203	219
AT3G55460.1	| Symbols: SCL30, At-SCL30 | SC35-like splicing factor 30 | chr3:20561024-20563502 FORWARD LENGTH=262	RsySPGYEGAAAAAPDR	S2 Phospho, Y3 Phospho	100%, 50%	20.19, 0.00	153.64	0.9983	40.99	30.18	2	1897.74	949.88	2	0.00486	2.56	203	219
AT3G55460.1	| Symbols: SCL30, At-SCL30 | SC35-like splicing factor 30 | chr3:20561024-20563502 FORWARD LENGTH=262	ySPPYYsPPR	Y1 Phospho, S7 Phospho	26%, 98%	0.00, 17.98	65.71	0.9214	9.75	27.69	2	1385.52	693.765	2	0.00638	4.6	4	13
AT3G55460.1	| Symbols: SCL30, At-SCL30 | SC35-like splicing factor 30 | chr3:20561024-20563502 FORWARD LENGTH=262	SRsVEVsPR	S3 Phospho, S7 Phospho	98%, 100%	17.98, 29.88	48.78	0.9155	9.65	27.99	2	1175.48	588.747	2	0.00548	4.66	254	262
AT3G55460.1	| Symbols: SCL30, At-SCL30 | SC35-like splicing factor 30 | chr3:20561024-20563502 FORWARD LENGTH=262	RySPPYYsPPR	Y2 Phospho, S8 Phospho	1%, 99%	0.00, 24.95	143.87	0.9942	21.45	29.53	2	1541.62	771.817	2	0.0083	5.38	3	13
AT4G39680.1	| Symbols: | SAP domain-containing protein | chr4:18414604-18416938 REVERSE LENGTH=633	SDsSVsEDGPKER	S3 Phospho, S6 Phospho	33%, 100%	0.00, 24.95	63.99	0.9963	22.02	26.84	2	1551.56	776.785	2	0.00586	3.77	434	446
AT4G39680.1	| Symbols: | SAP domain-containing protein | chr4:18414604-18416938 REVERSE LENGTH=633	SDsSVsEDGPK	S3 Phospho, S6 Phospho	100%, 100%	23.19, 24.95	90.74	0.9564	11.38	26.88	2	1266.41	634.212	2	0.00484	3.82	434	444
AT4G39680.1	| Symbols: | SAP domain-containing protein | chr4:18414604-18416938 REVERSE LENGTH=633	VPEAQITNSAtPTTtPR	T11 Phospho, T15 Phospho	100%, 100%	27.96, 27.96	396.48	0.9988	64.55	31.6	2	1942.85	972.432	2	0.00544	2.8	407	423
AT4G39680.1	| Symbols: | SAP domain-containing protein | chr4:18414604-18416938 REVERSE LENGTH=633	SDSsVsEDGPK	S4 Phospho, S6 Phospho	33%, 100%	0.00, 24.95	46.28	0.9771	17.11	25	2	1266.41	634.213	2	0.0069	5.44	434	444
AT4G39680.1	| Symbols: | SAP domain-containing protein | chr4:18414604-18416938 REVERSE LENGTH=633	VPEAQITNSATPTttPR	T14 Phospho, T15 Phospho	25%, 100%	0.00, 27.96	297.55	0.9981	42.23	31.68	2	1942.85	972.434	2	0.009	4.63	407	423
AT4G39680.1	| Symbols: | SAP domain-containing protein | chr4:18414604-18416938 REVERSE LENGTH=633	VPEAQITNsATPTTtPR	S9 Phospho, T15 Phospho	33%, 100%	0.00, 30.97	213.52	0.9971	32.44	31.61	2	1942.85	972.434	2	0.01	5.14	407	423
AT2G46630.1	| Symbols: | unknown protein; LOCATED IN: chloroplast; EXPRESSED IN: 22 plant structures; EXPRESSED DURING: 13 growth stages; Has 110095 Blast hits to 59224 proteins in 2216 species: Archae - 177; Bacteria - 15429; Metazoa - 38345; Fungi - 18843; Plants - 13341; Viruses - 3084; Other Eukaryotes - 20876 (source: NCBI BLink). | chr2:19145529-19146713 FORWARD LENGTH=394	SSYTsPPsPK	S5 Phospho, S8 Phospho	100%, 100%	55.92, 66.42	126.61	0.934	10.14	26.49	2	1209.44	605.728	2	0.00624	5.15	119	128
AT2G46630.1	| Symbols: | unknown protein; LOCATED IN: chloroplast; EXPRESSED IN: 22 plant structures; EXPRESSED DURING: 13 growth stages; Has 110095 Blast hits to 59224 proteins in 2216 species: Archae - 177; Bacteria - 15429; Metazoa - 38345; Fungi - 18843; Plants - 13341; Viruses - 3084; Other Eukaryotes - 20876 (source: NCBI BLink). | chr2:19145529-19146713 FORWARD LENGTH=394	SSYtSPPsPK	T4 Phospho, S8 Phospho	0%, 100%	0.00, 89.54	178.68	0.9937	29.47	26.5	2	1209.44	605.729	2	0.00698	5.76	119	128
ATCG00710.1	| Symbols: PSBH | photosystem II reaction center protein H | chrC:74485-74706 FORWARD LENGTH=73	AtQtVEDSSR	T2 Phospho, T4 Phospho	100%, 100%	140.92, 117.47	137.93	1	41.28	25.87	1	1252.44	627.229	2	0.0056	4.47	2	11
AT1G16610.1	| Symbols: SR45, RNPS1 | arginine/serine-rich 45 | chr1:5675925-5678686 REVERSE LENGTH=414	GRsPSsPPPR	S3 Phospho, S6 Phospho	100%, 50%	56.20, 0.00	128.08	0.9727	19.01	27.85	2	1196.47	599.245	2	0.000398	0.332	276	285
AT1G16610.1	| Symbols: SR45, RNPS1 | arginine/serine-rich 45 | chr1:5675925-5678686 REVERSE LENGTH=414	GRSPssPPPR	S5 Phospho, S6 Phospho	50%, 50%	0.00, 0.00	113.67	0.9578	13.75	28.51	2	1196.48	599.246	2	0.00374	3.12	276	285
AT1G16610.1	| Symbols: SR45, RNPS1 | arginine/serine-rich 45 | chr1:5675925-5678686 REVERSE LENGTH=414	yRSPPRGsPR	Y1 Phospho, S8 Phospho	50%, 100%	0.00, 45.42	63.11	0.9589	8.9	28.9	2	1331.56	666.786	2	0.00358	2.69	287	296
AT2G27100.1	| Symbols: SE | C2H2 zinc-finger protein SERRATE (SE) | chr2:11572587-11576357 FORWARD LENGTH=720	SGRTsEPNsEDEAAGVGK	S5 Phospho, S9 Phospho	99%, 100%	24.95, 63.12	226.63	0.9986	46.38	30.07	2	1949.75	975.88	2	0.00532	2.73	291	308
AT2G27100.1	| Symbols: SE | C2H2 zinc-finger protein SERRATE (SE) | chr2:11572587-11576357 FORWARD LENGTH=720	TsEPNsEDEAAGVGK	S2 Phospho, S6 Phospho	50%, 100%	0.00, 43.97	165.58	0.9987	42.34	26.94	2	1649.59	825.803	2	0.0052	3.15	294	308
AT5G52040.1	| Symbols: ATRSP41, RS41, At-RS41 | RNA-binding (RRM/RBD/RNP motifs) family protein | chr5:21131081-21133318 FORWARD LENGTH=356	GEsRsPPPYEK	S3 Phospho, S5 Phospho	100%, 100%	60.50, 66.42	85.68	0.9221	11.37	27.9	2	1405.53	703.774	2	0.00128	0.909	270	280
AT5G52040.1	| Symbols: ATRSP41, RS41, At-RS41 | RNA-binding (RRM/RBD/RNP motifs) family protein | chr5:21131081-21133318 FORWARD LENGTH=356	REsRsPPPYEK	S3 Phospho, S5 Phospho	100%, 100%	81.07, 89.54	119.26	0.9779	16.73	29.92	2	1504.61	753.315	2	0.00338	2.24	282	292
AT4G31580.2	| Symbols: SRZ-22, SRZ22, RSZP22, RSZ22, At-RSZ22 | serine/arginine-rich 22 | chr4:15306983-15308064 FORWARD LENGTH=200	RsPsPPPAR	S2 Phospho, S4 Phospho	100%, 100%	1,000.00, 1,000.00	53.92	0.9989	16.66	28.29	2	1123.46	562.738	2	0.00336	2.99	159	167
AT4G31580.2	| Symbols: SRZ-22, SRZ22, RSZP22, RSZ22, At-RSZ22 | serine/arginine-rich 22 | chr4:15306983-15308064 FORWARD LENGTH=200	sPsPPPAR	S1 Phospho, S3 Phospho	100%, 100%	1,000.00, 1,000.00	79.34	0.99	15.24	25.16	2	967.359	484.687	2	0.0022	2.27	160	167
AT4G31580.2	| Symbols: SRZ-22, SRZ22, RSZP22, RSZ22, At-RSZ22 | serine/arginine-rich 22 | chr4:15306983-15308064 FORWARD LENGTH=200	RRsPsPPPAR	S3 Phospho, S5 Phospho	100%, 100%	1,000.00, 1,000.00	145.6	0.9993	30.15	29.53	2	1279.56	427.528	3	0.00211	1.65	158	167
AT2G20960.1	| Symbols: pEARLI4 | Arabidopsis phospholipase-like protein (PEARLI 4) family | chr2:9007089-9009611 FORWARD LENGTH=748	DQtPPAsPAR	T3 Phospho, S7 Phospho	100%, 100%	1,000.00, 1,000.00	71.41	0.9575	8.43	26.56	2	1198.45	600.23	2	0.00354	2.95	53	62
AT1G01320.2	| Symbols: | Tetratricopeptide repeat (TPR)-like superfamily protein | chr1:121582-130099 REVERSE LENGTH=1787	QSDTsPPPsPASK	S5 Phospho, S9 Phospho	99%, 99%	24.95, 26.99	129.34	0.983	15.76	28.7	2	1457.55	729.783	2	0.0046	3.15	145	157
AT1G01320.2	| Symbols: | Tetratricopeptide repeat (TPR)-like superfamily protein | chr1:121582-130099 REVERSE LENGTH=1787	QSDtSPPPsPASK	T4 Phospho, S9 Phospho	33%, 100%	0.00, 47.16	161.87	0.9987	35.47	28.62	2	1457.55	729.784	2	0.0062	4.25	145	157
AT1G01320.2	| Symbols: | Tetratricopeptide repeat (TPR)-like superfamily protein | chr1:121582-130099 REVERSE LENGTH=1787	QsDTSPPPsPASK	S2 Phospho, S9 Phospho	25%, 99%	0.00, 21.95	67.7	0.9537	12.88	28.69	2	1457.55	729.784	2	0.00492	3.37	145	157
AT4G25500.3	| Symbols: ATRSP35, ATRSP40, AT-SRP40, RSP35, RS40, At-RS40 | arginine/serine-rich splicing factor 35 | chr4:13025850-13027243 FORWARD LENGTH=317	VAsPTKYsR	S3 Phospho, S8 Phospho	100%, 33%	47.48, 0.00	74.5	0.9989	30.37	27.9	2	1167.48	584.746	2	0.00442	3.78	227	235
AT4G25500.3	| Symbols: ATRSP35, ATRSP40, AT-SRP40, RSP35, RS40, At-RS40 | arginine/serine-rich splicing factor 35 | chr4:13025850-13027243 FORWARD LENGTH=317	SRsPRsPPADE	S3 Phospho, S6 Phospho	100%, 100%	29.21, 102.89	131.13	0.9439	12.45	27.09	2	1357.51	679.762	2	0.00354	2.6	307	317
AT4G38550.1	| Symbols: | Arabidopsis phospholipase-like protein (PEARLI 4) family | chr4:18025886-18028546 FORWARD LENGTH=612	NSsPPsPFHPAAYK	S3 Phospho, S6 Phospho	100%, 100%	23.19, 61.15	161.22	0.9972	34.01	29.87	2	1658.66	830.339	2	0.00974	5.87	235	248
AT4G38550.1	| Symbols: | Arabidopsis phospholipase-like protein (PEARLI 4) family | chr4:18025886-18028546 FORWARD LENGTH=612	NsSPPsPFHPAAYK	S2 Phospho, S6 Phospho	50%, 100%	0.00, 70.88	145.8	0.9943	25.23	29.91	2	1658.66	830.338	2	0.00922	5.55	235	248
AT2G33830.1	| Symbols: | Dormancy/auxin associated family protein | chr2:14309768-14310286 REVERSE LENGTH=106	TVAAVAGSPGtPTtPGSAR	T11 Phospho, T14 Phospho	100%, 33%	26.20, 0.00	238.37	0.993	23.43	31.69	2	1856.81	929.413	2	0.0041	2.21	38	56
AT2G33830.1	| Symbols: | Dormancy/auxin associated family protein | chr2:14309768-14310286 REVERSE LENGTH=106	TVAAVAGsPGTPTtPGSAR	S8 Phospho, T14 Phospho	33%, 33%	0.00, 0.00	128.74	0.9979	34	31.73	2	1856.82	619.946	3	0.00834	4.49	38	56
AT2G33830.1	| Symbols: | Dormancy/auxin associated family protein | chr2:14309768-14310286 REVERSE LENGTH=106	TVAAVAGsPGTPTTPGsAR	S8 Phospho, S17 Phospho	100%, 100%	39.33, 23.20	268.77	0.9982	45.71	31.69	2	1856.81	929.413	2	0.00396	2.13	38	56
AT2G33830.1	| Symbols: | Dormancy/auxin associated family protein | chr2:14309768-14310286 REVERSE LENGTH=106	TVAAVAGSPGtPTTPGsAR	T11 Phospho, S17 Phospho	25%, 99%	0.00, 20.20	102.76	0.9217	10.7	31.74	2	1856.81	619.945	3	0.00663	3.57	38	56
AT2G33830.1	| Symbols: | Dormancy/auxin associated family protein | chr2:14309768-14310286 REVERSE LENGTH=106	TVAAVAGSPGTPTtPGsAR	T14 Phospho, S17 Phospho	33%, 100%	0.00, 26.20	244.62	0.9981	35.55	31.74	2	1856.81	929.414	2	0.00618	3.33	38	56
AT4G05150.1	| Symbols: | Octicosapeptide/Phox/Bem1p family protein | chr4:2660339-2662675 FORWARD LENGTH=477	EVStLSDPGsPR	T4 Phospho, S10 Phospho	0%, 100%	0.00, 47.48	172.49	0.9982	50.22	28.14	2	1403.54	702.78	2	0.0076	5.41	261	272
AT4G05150.1	| Symbols: | Octicosapeptide/Phox/Bem1p family protein | chr4:2660339-2662675 FORWARD LENGTH=477	EVSTLsDPGsPR	S6 Phospho, S10 Phospho	100%, 100%	44.63, 120.11	187.22	0.9989	44.03	28.15	2	1403.54	702.779	2	0.00632	4.5	261	272
AT4G05150.1	| Symbols: | Octicosapeptide/Phox/Bem1p family protein | chr4:2660339-2662675 FORWARD LENGTH=477	ASSIssLLDSSVNR	S5 Phospho, S6 Phospho	33%, 100%	0.00, 27.96	107.4	0.9974	47.83	30.22	2	1594.67	798.345	2	0.0105	6.58	175	188
AT4G05150.1	| Symbols: | Octicosapeptide/Phox/Bem1p family protein | chr4:2660339-2662675 FORWARD LENGTH=477	EVSTLsDPGsPRR	S6 Phospho, S10 Phospho	100%, 100%	38.17, 115.01	113.69	0.9928	18.65	29.58	2	1559.64	780.829	2	0.00536	3.43	261	273
AT4G05150.1	| Symbols: | Octicosapeptide/Phox/Bem1p family protein | chr4:2660339-2662675 FORWARD LENGTH=477	EVStLSDPGsPRR	T4 Phospho, S10 Phospho	0%, 100%	0.00, 117.05	126.79	0.9962	20.74	29.52	2	1559.65	780.83	2	0.00668	4.28	261	273
AT4G05150.1	| Symbols: | Octicosapeptide/Phox/Bem1p family protein | chr4:2660339-2662675 FORWARD LENGTH=477	EVsTLSDPGsPRR	S3 Phospho, S10 Phospho	1%, 100%	0.00, 91.01	78.37	0.9928	19.35	29.63	2	1559.65	780.831	2	0.00818	5.24	261	273
AT3G53500.1	| Symbols: RSZ32, RS2Z32, At-RS2Z | RNA-binding (RRM/RBD/RNP motifs) family protein with retrovirus zinc finger-like domain | chr3:19834557-19835896 REVERSE LENGTH=243	DQsLsPDRK	S3 Phospho, S5 Phospho	100%, 100%	1,000.00, 1,000.00	118.82	0.9995	21.98	26.67	2	1204.46	603.236	2	0.00376	3.12	171	179
AT3G53500.1	| Symbols: RSZ32, RS2Z32, At-RS2Z | RNA-binding (RRM/RBD/RNP motifs) family protein with retrovirus zinc finger-like domain | chr3:19834557-19835896 REVERSE LENGTH=243	GRDQsLsPDRK	S5 Phospho, S7 Phospho	100%, 100%	1,000.00, 1,000.00	89.27	0.9905	15.84	29.33	2	1417.58	473.533	3	0.00282	1.99	169	179
AT3G53500.1	| Symbols: RSZ32, RS2Z32, At-RS2Z | RNA-binding (RRM/RBD/RNP motifs) family protein with retrovirus zinc finger-like domain | chr3:19834557-19835896 REVERSE LENGTH=243	QGGSySRsPVK	Y5 Phospho, S8 Phospho	50%, 50%	0.00, 0.00	32.83	0.9465	13.73	28.62	2	1324.52	663.269	2	0.00284	2.14	106	116
AT3G53500.1	| Symbols: RSZ32, RS2Z32, At-RS2Z | RNA-binding (RRM/RBD/RNP motifs) family protein with retrovirus zinc finger-like domain | chr3:19834557-19835896 REVERSE LENGTH=243	DQsLsPDR	S3 Phospho, S5 Phospho	100%, 100%	1,000.00, 1,000.00	58.64	0.99	13.86	25	2	1076.36	539.189	2	0.00528	4.9	171	178
AT3G53500.1	| Symbols: RSZ32, RS2Z32, At-RS2Z | RNA-binding (RRM/RBD/RNP motifs) family protein with retrovirus zinc finger-like domain | chr3:19834557-19835896 REVERSE LENGTH=243	sPIDDEAELSRPsPK	S1 Phospho, S13 Phospho	100%, 100%	77.06, 23.20	101.16	0.9316	8.8	31.36	2	1799.75	900.88	2	0.00784	4.35	224	238
AT3G53500.1	| Symbols: RSZ32, RS2Z32, At-RS2Z | RNA-binding (RRM/RBD/RNP motifs) family protein with retrovirus zinc finger-like domain | chr3:19834557-19835896 REVERSE LENGTH=243	GRDQsLsPDR	S5 Phospho, S7 Phospho	100%, 100%	1,000.00, 1,000.00	76.74	0.9687	13.17	26.78	2	1289.49	645.75	2	0.00478	3.7	169	178
AT5G53440.1	| Symbols: | unknown protein; FUNCTIONS IN: molecular_function unknown; INVOLVED IN: biological_process unknown; LOCATED IN: cytosol; EXPRESSED IN: 25 plant structures; EXPRESSED DURING: 15 growth stages; Has 1807 Blast hits to 1807 proteins in 277 species: Archae - 0; Bacteria - 0; Metazoa - 736; Fungi - 347; Plants - 385; Viruses - 0; Other Eukaryotes - 339 (source: NCBI BLink). | chr5:21683679…	AKsVEAGSNLTsPAK	S3 Phospho, S12 Phospho	100%, 100%	110.97, 27.96	218.91	0.9988	36.82	31.28	2	1618.71	810.361	2	0.0071	4.38	810	824
AT5G53440.1	| Symbols: | unknown protein; FUNCTIONS IN: molecular_function unknown; INVOLVED IN: biological_process unknown; LOCATED IN: cytosol; EXPRESSED IN: 25 plant structures; EXPRESSED DURING: 15 growth stages; Has 1807 Blast hits to 1807 proteins in 277 species: Archae - 0; Bacteria - 0; Metazoa - 736; Fungi - 347; Plants - 385; Viruses - 0; Other Eukaryotes - 339 (source: NCBI BLink). | chr5:21683679…	sVEAGSNLTsPAK	S1 Phospho, S10 Phospho	100%, 100%	39.82, 27.96	89.1	0.9255	8.46	29.59	2	1419.57	710.795	2	0.0065	4.57	812	824
AT5G53440.1	| Symbols: | unknown protein; FUNCTIONS IN: molecular_function unknown; INVOLVED IN: biological_process unknown; LOCATED IN: cytosol; EXPRESSED IN: 25 plant structures; EXPRESSED DURING: 15 growth stages; Has 1807 Blast hits to 1807 proteins in 277 species: Archae - 0; Bacteria - 0; Metazoa - 736; Fungi - 347; Plants - 385; Viruses - 0; Other Eukaryotes - 339 (source: NCBI BLink). | chr5:21683679…	EVAELsGGsER	S6 Phospho, S9 Phospho	100%, 100%	1,000.00, 1,000.00	107.41	0.9987	20.34	30.97	2	1292.48	647.246	2	0.00794	6.14	482	492
AT3G13570.1	| Symbols: SCL30A, At-SCL30A | SC35-like splicing factor 30A | chr3:4429564-4431602 REVERSE LENGTH=262	sYtPEQAR	S1 Phospho, T3 Phospho	50%, 100%	0.00, 52.40	107.18	0.99	21.07	25	2	1110.38	556.199	2	0.00416	3.74	227	234
AT3G13570.1	| Symbols: SCL30A, At-SCL30A | SC35-like splicing factor 30A | chr3:4429564-4431602 REVERSE LENGTH=262	ySRsPPPR	Y1 Phospho, S4 Phospho	67%, 67%	0.00, 0.00	57.73	0.9829	16.57	26.71	2	1118.44	560.226	2	0.00546	4.88	145	152
AT3G13570.1	| Symbols: SCL30A, At-SCL30A | SC35-like splicing factor 30A | chr3:4429564-4431602 REVERSE LENGTH=262	QsRsPTPVPR	S2 Phospho, S4 Phospho	99%, 100%	21.95, 24.95	89.05	0.9282	8.41	29.11	2	1283.55	642.78	2	0.00348	2.71	242	251
AT1G52380.1	| Symbols: | NUP50 (Nucleoporin 50 kDa) protein | chr1:19509979-19511301 FORWARD LENGTH=440	SALPLKtPENsPTATDT	T7 Phospho, S11 Phospho	100%, 100%	145.93, 20.98	249.31	0.9984	33.9	31.15	2	1901.81	951.912	2	0.0041	2.15	424	440
AT4G15802.1	| Symbols: HSBP, AtHSBP | heat shock factor binding protein | chr4:8986864-8988339 REVERSE LENGTH=86	SGDEPKtPASSs	T7 Phospho, S12 Phospho	100%, 25%	43.77, 0.00	67.03	0.9337	11.11	25.6	2	1321.45	661.733	2	0.004	3.02	75	86
AT1G07110.1	| Symbols: F2KP, ATF2KP, FKFBP | fructose-2,6-bisphosphatase | chr1:2178363-2183980 REVERSE LENGTH=744	sVETLsPFQQK	S1 Phospho, S6 Phospho	67%, 67%	0.00, 0.00	23.79	0.9287	10.65	33.59	2	1422.59	712.301	2	0.00358	2.51	271	281
AT1G17210.1	| Symbols: ATILP1, ILP1 | IAP-like protein 1 | chr1:5880502-5884657 REVERSE LENGTH=958	LGDsQDRVsQSVVR	S4 Phospho, S9 Phospho	100%, 100%	67.32, 54.16	97.83	0.9601	10.1	31.18	2	1704.73	853.373	2	0.0074	4.34	759	772
AT1G20760.1	| Symbols: | Calcium-binding EF hand family protein | chr1:7209515-7214773 FORWARD LENGTH=1019	FDsINsSK	S3 Phospho, S6 Phospho	100%, 99%	59.15, 22.52	58.6	0.99	19.03	25.28	2	1056.36	529.189	2	0.00608	5.75	920	927
AT5G03040.3	| Symbols: iqd2 | IQ-domain 2 | chr5:710380-712406 REVERSE LENGTH=461	QSSssPPPALAPR	S4 Phospho, S5 Phospho	50%, 50%	0.00, 0.00	92.09	0.933	10.55	29.82	2	1453.6	727.81	2	0.00428	2.94	45	57
AT5G03040.3	| Symbols: iqd2 | IQ-domain 2 | chr5:710380-712406 REVERSE LENGTH=461	QSsSsPPPALAPR	S3 Phospho, S5 Phospho	50%, 50%	0.00, 0.00	90.67	0.9953	23.72	29.9	2	1453.61	727.811	2	0.00736	5.06	45	57
AT5G03040.3	| Symbols: iqd2 | IQ-domain 2 | chr5:710380-712406 REVERSE LENGTH=461	QsSSsPPPALAPR	S2 Phospho, S5 Phospho	50%, 50%	0.00, 0.00	119.91	0.999	40.88	29.81	2	1453.61	727.811	2	0.0062	4.26	45	57
AT2G29210.1	| Symbols: | splicing factor PWI domain-containing protein | chr2:12558156-12562168 FORWARD LENGTH=878	RsPsPPAR	S2 Phospho, S4 Phospho	100%, 100%	1,000.00, 1,000.00	53.06	0.925	7.92	26.94	2	1026.41	514.211	2	0.002	1.94	311	318
AT2G29210.1	| Symbols: | splicing factor PWI domain-containing protein | chr2:12558156-12562168 FORWARD LENGTH=878	NRsPsPLYR	S3 Phospho, S5 Phospho	100%, 100%	93.64, 46.67	113.22	0.956	8.33	29.2	2	1248.51	625.262	2	0.00502	4.02	399	407
AT2G29210.1	| Symbols: | splicing factor PWI domain-containing protein | chr2:12558156-12562168 FORWARD LENGTH=878	sLtPDEER	S1 Phospho, T3 Phospho	100%, 100%	1,000.00, 1,000.00	124	0.99	27.34	25	2	1105.38	553.697	2	0.0055	4.97	531	538
AT2G29210.1	| Symbols: | splicing factor PWI domain-containing protein | chr2:12558156-12562168 FORWARD LENGTH=878	RRsPsPPAR	S3 Phospho, S5 Phospho	100%, 100%	1,000.00, 1,000.00	52.97	0.9604	15.8	29.41	2	1182.51	395.176	3	0.00101	0.855	310	318
AT1G11360.1	| Symbols: | Adenine nucleotide alpha hydrolases-like superfamily protein | chr1:3822171-3822899 REVERSE LENGTH=242	KsPTVVTVQPSsPR	S2 Phospho, S12 Phospho	100%, 50%	48.15, 0.00	178.3	0.9819	18.85	31.3	2	1641.76	821.885	2	0.0023	1.4	13	26
AT2G43680.2	| Symbols: IQD14 | IQ-domain 14 | chr2:18109302-18111587 FORWARD LENGTH=668	TLsPKPPsPR	S3 Phospho, S8 Phospho	99%, 100%	20.19, 122.48	133.86	0.9687	15.74	29.71	2	1238.55	620.282	2	0.00274	2.21	125	134
AT2G43680.2	| Symbols: IQD14 | IQ-domain 14 | chr2:18109302-18111587 FORWARD LENGTH=668	VAsPRPTsPR	S3 Phospho, S8 Phospho	100%, 50%	55.86, 0.00	73.32	0.9716	15.02	29.28	2	1226.53	614.271	2	0.0056	4.56	100	109
AT2G43680.2	| Symbols: IQD14 | IQ-domain 14 | chr2:18109302-18111587 FORWARD LENGTH=668	sLSPKPPsPR	S1 Phospho, S8 Phospho	1%, 100%	0.00, 115.01	111.69	0.9891	17.58	29.26	2	1224.54	613.275	2	0.00534	4.36	140	149
AT2G43680.2	| Symbols: IQD14 | IQ-domain 14 | chr2:18109302-18111587 FORWARD LENGTH=668	SLsPKPPsPR	S3 Phospho, S8 Phospho	99%, 100%	20.19, 91.83	93.74	0.9591	13.46	29.29	2	1224.54	613.275	2	0.00444	3.62	140	149
AT1G15400.2	| Symbols: | unknown protein; FUNCTIONS IN: molecular_function unknown; INVOLVED IN: biological_process unknown; LOCATED IN: plasma membrane; EXPRESSED IN: 23 plant structures; EXPRESSED DURING: 13 growth stages; BEST Arabidopsis thaliana protein match is: unknown protein (TAIR:AT1G80180.1); Has 82 Blast hits to 82 proteins in 16 species: Archae - 0; Bacteria - 4; Metazoa - 0; Fungi - 0; Plants -…	TTGRVsPAVDPPsPR	S6 Phospho, S13 Phospho	100%, 100%	37.49, 161.44	185.52	0.999	31.95	31.24	2	1695.75	848.88	2	0.00752	4.43	95	109
AT1G15400.2	| Symbols: | unknown protein; FUNCTIONS IN: molecular_function unknown; INVOLVED IN: biological_process unknown; LOCATED IN: plasma membrane; EXPRESSED IN: 23 plant structures; EXPRESSED DURING: 13 growth stages; BEST Arabidopsis thaliana protein match is: unknown protein (TAIR:AT1G80180.1); Has 82 Blast hits to 82 proteins in 16 species: Archae - 0; Bacteria - 4; Metazoa - 0; Fungi - 0; Plants -…	VsPAVDPPsPR	S2 Phospho, S9 Phospho	100%, 100%	1,000.00, 1,000.00	113.13	0.9989	16.12	28.81	2	1280.53	641.27	2	0.00476	3.71	99	109
AT3G61860.1	| Symbols: ATRSP31, RSP31, At-RS31, RS31 | RNA-binding (RRM/RBD/RNP motifs) family protein | chr3:22900311-22902159 REVERSE LENGTH=264	yRSRsPVPR	Y1 Phospho, S5 Phospho	0%, 100%	0.00, 24.95	102.46	0.9947	19.38	30.07	2	1276.55	639.283	2	0.0042	3.29	253	261
AT3G61860.1	| Symbols: ATRSP31, RSP31, At-RS31, RS31 | RNA-binding (RRM/RBD/RNP motifs) family protein | chr3:22900311-22902159 REVERSE LENGTH=264	RsLsPVYR	S2 Phospho, S4 Phospho	100%, 100%	93.64, 74.63	122.07	0.99	28.47	28.6	2	1136.48	569.248	2	0.00422	3.71	180	187
AT1G29400.2	| Symbols: AML5, ML5 | MEI2-like protein 5 | chr1:10290393-10293696 REVERSE LENGTH=800	sPVFGLsPTR	S1 Phospho, S7 Phospho	100%, 100%	142.88, 23.20	137.68	0.9977	37.4	29.7	2	1219.51	610.763	2	0.0078	6.39	384	393
AT2G29140.1	| Symbols: APUM3, PUM3 | pumilio 3 | chr2:12531392-12535060 FORWARD LENGTH=964	VPsPcLtPIGSGR	S3 Phospho, T7 Phospho	100%, 100%	216.32, 83.70	168.63	0.9993	23.15	29.61	2	1499.63	750.821	2	0.00319	2.13	266	278
AT1G08680.2	| Symbols: ZIGA4 | ARF GAP-like zinc finger-containing protein ZIGA4 | chr1:2762820-2768387 FORWARD LENGTH=648	ASsFVYsPGR	S3 Phospho, S7 Phospho	99%, 100%	24.95, 27.96	110.98	0.9932	25	27.06	2	1229.45	615.734	2	0.0011	0.892	190	199
AT1G08680.2	| Symbols: ZIGA4 | ARF GAP-like zinc finger-containing protein ZIGA4 | chr1:2762820-2768387 FORWARD LENGTH=648	AsSFVYsPGR	S2 Phospho, S7 Phospho	1%, 100%	0.00, 26.20	107.42	0.9364	11.2	26.95	2	1229.46	615.735	2	0.00346	2.81	190	199
AT3G05420.2	| Symbols: ACBP4 | acyl-CoA binding protein 4 | chr3:1561880-1567047 FORWARD LENGTH=669	DIEsEVEVsQEGR	S4 Phospho, S9 Phospho	100%, 100%	1,000.00, 1,000.00	87.18	0.9995	27.72	28.37	2	1635.62	818.815	2	0.00858	5.24	513	525
AT1G42550.1	| Symbols: PMI1 | plastid movement impaired1 | chr1:15977131-15979734 FORWARD LENGTH=843	TsFSVPsPK	S2 Phospho, S7 Phospho	49%, 100%	0.00, 50.19	80.55	0.94	11.3	27.43	2	1108.43	555.221	2	0.00356	3.21	322	330
AT1G42550.1	| Symbols: PMI1 | plastid movement impaired1 | chr1:15977131-15979734 FORWARD LENGTH=843	tSFSVPsPK	T1 Phospho, S7 Phospho	50%, 100%	0.00, 50.19	112.34	0.9964	27.79	27.66	2	1108.43	555.221	2	0.00404	3.64	322	330
AT4G31880.1	| Symbols: | LOCATED IN: cytosol, chloroplast; EXPRESSED IN: 24 plant structures; EXPRESSED DURING: 14 growth stages; BEST Arabidopsis thaliana protein match is: Tudor/PWWP/MBT superfamily protein (TAIR:AT1G15940.1); Has 137162 Blast hits to 70781 proteins in 2973 species: Archae - 289; Bacteria - 24182; Metazoa - 56725; Fungi - 20130; Plants - 6559; Viruses - 758; Other Eukaryotes - 28519 (sourc…	AIDEESLHTssGDNEKPAVSSGK	S10 Phospho, S11 Phospho	100%, 100%	27.96, 43.97	238.45	0.9978	36.53	32.45	2	2517.04	840.02	3	0.00791	3.14	549	571
AT4G29440.2	| Symbols: | Regulator of Vps4 activity in the MVB pathway protein | chr4:14473942-14477683 REVERSE LENGTH=1062	TQEEsDAEtPTGLK	S5 Phospho, T9 Phospho	100%, 100%	93.41, 48.15	219.61	0.9996	37.64	28.76	2	1664.63	833.321	2	0.00462	2.77	637	650
AT1G16520.1	| Symbols: | unknown protein; FUNCTIONS IN: molecular_function unknown; INVOLVED IN: biological_process unknown; LOCATED IN: plasma membrane; EXPRESSED IN: 22 plant structures; EXPRESSED DURING: 13 growth stages; BEST Arabidopsis thaliana protein m	IIsTSVsPR	S3 Phospho, S7 Phospho	99%, 99%	22.52, 24.95	99.99	0.9926	17.33	29.23	2	1118.48	560.248	2	0.00444	3.96	0	0
AT5G21160.2	| Symbols: | LA RNA-binding protein | chr5:7198817-7203879 REVERSE LENGTH=832	LSSSPQcTLSGSsPPVGsLPK	S13 Phospho, S18 Phospho	99%, 100%	23.19, 49.77	159.78	0.9981	31.55	32.1	2	2244.98	1123.5	2	0.0108	4.79	632	652
AT5G21160.2	| Symbols: | LA RNA-binding protein | chr5:7198817-7203879 REVERSE LENGTH=832	LSSSPQctLsGSSPPVGSLPK	T8 Phospho, S10 Phospho	29%, 29%	0.00, 0.00	137.63	0.9943	21.65	32.08	2	2244.98	1123.5	2	0.00975	4.34	632	652
AT5G21160.2	| Symbols: | LA RNA-binding protein | chr5:7198817-7203879 REVERSE LENGTH=832	LsSSPQcTLSGSSPPVGsLPK	S2 Phospho, S18 Phospho	17%, 99%	0.00, 23.20	64.91	0.9774	14.46	32.11	2	2244.99	1123.5	2	0.013	5.77	632	652
AT5G21160.2	| Symbols: | LA RNA-binding protein | chr5:7198817-7203879 REVERSE LENGTH=832	LSSSPQcTLsGsSPPVGSLPK	S10 Phospho, S12 Phospho	100%, 25%	27.96, 0.00	116.2	0.9957	23.94	32.1	2	2244.99	1123.5	2	0.011	4.88	632	652
AT1G80180.1	| Symbols: | unknown protein; FUNCTIONS IN: molecular_function unknown; INVOLVED IN: biological_process unknown; LOCATED IN: plasma membrane; EXPRESSED IN: 21 plant structures; EXPRESSED DURING: 10 growth stages; BEST Arabidopsis thaliana protein m	NTGRVsPAVDPPsPR	S6 Phospho, S13 Phospho	98%, 100%	15.97, 93.91	110.43	0.9236	11.6	31.05	2	1708.74	570.587	3	0.00422	2.47	0	0
AT1G35580.2	| Symbols: CINV1 | cytosolic invertase 1 | chr1:13122460-13124808 REVERSE LENGTH=551	SVLDtPLSsAR	T5 Phospho, S9 Phospho	100%, 50%	47.48, 0.00	113.19	0.9675	17.14	29.29	2	1304.55	653.282	2	0.00812	6.22	66	76
AT1G35580.2	| Symbols: CINV1 | cytosolic invertase 1 | chr1:13122460-13124808 REVERSE LENGTH=551	SVLDtPLsSAR	T5 Phospho, S8 Phospho	100%, 99%	57.42, 21.95	124.79	0.9961	24.85	29.28	2	1304.55	653.28	2	0.00418	3.2	66	76
AT1G79280.3	| Symbols: NUA | nuclear pore anchor | chr1:29819176-29832809 REVERSE LENGTH=2094	EEVQPEtLATPTQsPSR	T7 Phospho, S14 Phospho	33%, 99%	0.00, 20.98	114.28	0.9931	19.46	32.12	2	2028.85	1015.43	2	0.00842	4.15	1916	1932
AT1G79280.3	| Symbols: NUA | nuclear pore anchor | chr1:29819176-29832809 REVERSE LENGTH=2094	SPEKEEVQPETLAtPTQsPSR	T14 Phospho, S18 Phospho	100%, 100%	53.49, 24.95	224.02	0.9879	29.35	33.04	2	2470.07	824.364	3	0.0025	1.01	1912	1932
AT1G59710.1	| Symbols: | Protein of unknown function (DUF569) | chr1:21938623-21939673 FORWARD LENGTH=300	QEStDSLAVGsPPK	T4 Phospho, S11 Phospho	49%, 100%	0.00, 84.78	152.95	0.9947	20.45	29.65	2	1574.63	788.322	2	0.00344	2.18	194	207
AT1G59710.1	| Symbols: | Protein of unknown function (DUF569) | chr1:21938623-21939673 FORWARD LENGTH=300	QEsTDSLAVGsPPK	S3 Phospho, S11 Phospho	100%, 100%	27.96, 72.13	201.7	0.9963	50.44	29.53	2	1574.63	788.321	2	1.81e-05	0.0115	194	207
AT5G04990.1	| Symbols: SUN1, ATSUN1 | SAD1/UNC-84 domain protein 1 | chr5:1471698-1473770 REVERSE LENGTH=471	SVsAAtGTNTTATQR	S3 Phospho, T6 Phospho	99%, 96%	18.56, 13.32	121.68	1	51.37	33.91	2	2436.99	813.336	3	812	51.6	75	89
AT5G38640.1	| Symbols: | NagB/RpiA/CoA transferase-like superfamily protein | chr5:15468020-15470674 REVERSE LENGTH=642	VAVAGAAAsAVSPSSFSySSR	S9 Phospho, Y18 Phospho	25%, 25%	0.00, 0.00	91.37	0.9828	17.77	32.02	2	2130.91	1066.46	2	0.0103	4.84	77	97
AT5G03280.1	| Symbols: EIN2, PIR2, CKR1, ERA3, ORE3, ORE2, ATEIN2 | NRAMP metal ion transporter family protein | chr5:788589-793066 FORWARD LENGTH=1294	SLSGEGGsGTGsLSR	S8 Phospho, S12 Phospho	95%, 21%	16.24, 0.00	38.46	0.9844	16.23	27.97	2	1510.58	756.296	2	0.0064	4.23	648	662
AT5G64330.1	| Symbols: NPH3, RPT3, JK218 | Phototropic-responsive NPH3 family protein | chr5:25727568-25730225 FORWARD LENGTH=746	APsPSTTNFAGSsPR	S3 Phospho, S13 Phospho	100%, 100%	50.64, 23.19	224.85	0.9984	36.21	29.07	2	1635.64	818.826	2	0.00392	2.39	211	225
AT5G47690.3	| Symbols: | binding | chr5:19317899-19327014 FORWARD LENGTH=1607	NVSLDsHDENsDQEK	S6 Phospho, S11 Phospho	99%, 96%	18.44, 14.23	72.37	0.9541	13.38	27.34	2	1875.66	938.838	2	0.00516	2.75	1279	1293
AT4G35890.1	| Symbols: | winged-helix DNA-binding transcription factor family protein | chr4:16997433-17000410 FORWARD LENGTH=523	ISGNHGsPTASVAQsPR	S7 Phospho, S15 Phospho	100%, 100%	27.96, 43.77	145.13	0.9972	21.3	31.17	2	1824.76	913.388	2	0.0051	2.79	19	35
AT1G75100.1	| Symbols: JAC1 | J-domain protein required for chloroplast accumulation response 1 | chr1:28191108-28193769 REVERSE LENGTH=651	VNESsSLPGsR	S5 Phospho, S10 Phospho	33%, 100%	0.00, 34.46	77.23	0.9974	22.22	27.49	2	1291.49	646.753	2	0.00754	5.83	106	116
AT1G73350.1	| Symbols: | unknown protein; FUNCTIONS IN: molecular_function unknown; INVOLVED IN: biological_process unknown; LOCATED IN: nucleus; EXPRESSED IN: 25 plant structures; EXPRESSED DURING: 15 growth stages; Has 46 Blast hits to 46 proteins in 19 species: Archae - 0; Bacteria - 0; Metazoa - 3; Fungi - 3; Plants - 36; Viruses - 0; Other Eukaryotes - 4 (source: NCBI BLink). | chr1:27575683-27577126 RE…	ISTPSsPSLsPPVR	S6 Phospho, S10 Phospho	33%, 100%	0.00, 23.20	94	0.9522	15.24	30.93	2	1583.71	792.862	2	0.00904	5.7	134	147
AT1G73350.1	| Symbols: | unknown protein; FUNCTIONS IN: molecular_function unknown; INVOLVED IN: biological_process unknown; LOCATED IN: nucleus; EXPRESSED IN: 25 plant structures; EXPRESSED DURING: 15 growth stages; Has 46 Blast hits to 46 proteins in 19 species: Archae - 0; Bacteria - 0; Metazoa - 3; Fungi - 3; Plants - 36; Viruses - 0; Other Eukaryotes - 4 (source: NCBI BLink). | chr1:27575683-27577126 RE…	ISTPsSPSLsPPVR	S5 Phospho, S10 Phospho	49%, 100%	0.00, 27.96	98.6	0.9965	29.73	31.02	2	1583.71	792.861	2	0.00704	4.44	134	147
AT1G73350.1	| Symbols: | unknown protein; FUNCTIONS IN: molecular_function unknown; INVOLVED IN: biological_process unknown; LOCATED IN: nucleus; EXPRESSED IN: 25 plant structures; EXPRESSED DURING: 15 growth stages; Has 46 Blast hits to 46 proteins in 19 species: Archae - 0; Bacteria - 0; Metazoa - 3; Fungi - 3; Plants - 36; Viruses - 0; Other Eukaryotes - 4 (source: NCBI BLink). | chr1:27575683-27577126 RE…	IStPSSPSLsPPVR	T3 Phospho, S10 Phospho	25%, 100%	0.00, 48.15	85.9	0.9375	14.56	30.93	2	1583.71	792.862	2	0.00898	5.67	134	147
AT2G38410.1	| Symbols: | ENTH/VHS/GAT family protein | chr2:16086912-16090047 REVERSE LENGTH=671	DSssIAGSSSPIPATVSTGK	S3 Phospho, S4 Phospho	40%, 40%	0.00, 0.00	137.77	0.988	33.3	31.55	2	2007.86	1004.94	2	0.0148	7.38	349	368
AT2G38410.1	| Symbols: | ENTH/VHS/GAT family protein | chr2:16086912-16090047 REVERSE LENGTH=671	DSSsIAGsSSPIPATVSTGK	S4 Phospho, S8 Phospho	33%, 0%	0.00, 0.00	254.51	1	52.42	31.54	2	2007.85	1004.93	2	0.00982	4.89	349	368
AT3G28920.1	| Symbols: AtHB34, HB34, ZHD9 | homeobox protein 34 | chr3:10940598-10941536 REVERSE LENGTH=312	sPEPESEtPTR	S1 Phospho, T8 Phospho	100%, 98%	93.64, 20.19	115.83	0.9573	13.87	26.79	2	1388.49	695.254	2	0.00382	2.75	13	23
AT2G02070.1	| Symbols: AtIDD5, IDD5 | indeterminate(ID)-domain 5 | chr2:505523-509154 FORWARD LENGTH=602	tPNSDAEVIALsPK	T1 Phospho, S12 Phospho	100%, 100%	21.44, 174.88	180.55	0.9996	42.86	30.37	2	1600.68	801.349	2	0.00448	2.8	60	73
AT3G46440.1	| Symbols: UXS5 | UDP-XYL synthase 5 | chr3:17089268-17091611 REVERSE LENGTH=341	QTsPKPPPsPSPLR	S3 Phospho, S9 Phospho	50%, 100%	0.00, 27.96	108.48	0.9826	17.06	31.39	2	1647.75	824.882	2	0.0074	4.49	7	20
AT3G46440.1	| Symbols: UXS5 | UDP-XYL synthase 5 | chr3:17089268-17091611 REVERSE LENGTH=341	QtSPKPPPsPSPLR	T2 Phospho, S9 Phospho	33%, 100%	0.00, 40.49	89.8	0.9673	14.91	31.41	2	1647.75	550.257	3	0.00589	3.57	7	20
AT5G55230.2	| Symbols: MAP65-1 | microtubule-associated proteins 65-1 | chr5:22402716-22405182 FORWARD LENGTH=616	EEAAsSPVSGAADHQVPAsP	S5 Phospho, S19 Phospho	100%, 100%	30.97, 53.40	118.49	0.9384	11.07	30.28	2	2065.81	1033.91	2	0.00932	4.51	597	616
AT5G55230.2	| Symbols: MAP65-1 | microtubule-associated proteins 65-1 | chr5:22402716-22405182 FORWARD LENGTH=616	EEAASsPVSGAADHQVPAsP	S6 Phospho, S19 Phospho	50%, 100%	0.00, 103.97	140.66	0.9936	18.99	30.27	2	2065.81	1033.91	2	0.00892	4.31	597	616
AT4G24275.1	| Symbols: | Identified as a screen for stress-responsive genes. | chr4:12588579-12588959 FORWARD LENGTH=126	sVSASAQAVPsPIK	S1 Phospho, S11 Phospho	98%, 100%	18.95, 72.94	60.71	0.9741	14.68	30.78	2	1500.67	751.341	2	0.00566	3.77	44	57
AT5G05170.1	| Symbols: CESA3, IXR1, ATCESA3, ATH-B, CEV1 | Cellulose synthase family protein | chr5:1530401-1535090 REVERSE LENGTH=1065	NTGPVsTQAAsER	S6 Phospho, S11 Phospho	50%, 100%	0.00, 55.89	88.31	0.9978	33.8	28.41	2	1476.57	739.294	2	0.00884	5.98	206	218
AT5G62810.1	| Symbols: PEX14, ATPEX14, PED2 | peroxin 14 | chr5:25220323-25223571 FORWARD LENGTH=507	sAsPPAAPADSSAPPHPK	S1 Phospho, S3 Phospho	100%, 100%	55.82, 55.82	101.75	0.9989	14.94	30.88	2	1843.76	922.888	2	0.00688	3.73	310	327
AT3G08710.2	| Symbols: ATH9, TRX H9, TH9 | thioredoxin H-type 9 | chr3:2645590-2646304 FORWARD LENGTH=140	VTsIIDSVPEsPQRP	S3 Phospho, S11 Phospho	0%, 100%	0.00, 49.22	77.68	0.9665	15.99	31.47	2	1783.79	892.902	2	0.00996	5.58	126	140
AT3G09670.1	| Symbols: | Tudor/PWWP/MBT superfamily protein | chr3:2966637-2968817 FORWARD LENGTH=726	ANLQTEDPGsPVsPK	S10 Phospho, S13 Phospho	100%, 100%	84.78, 122.98	227.37	0.9986	26.12	30.88	2	1698.7	850.357	2	0.00856	5.04	513	527
AT2G35880.1	| Symbols: | TPX2 (targeting protein for Xklp2) protein family | chr2:15063204-15065259 REVERSE LENGTH=432	SsVGsASGFSFR	S2 Phospho, S5 Phospho	50%, 100%	0.00, 20.77	105.71	0.9951	33.25	26.18	2	1347.5	674.757	2	0.009	6.67	238	249
AT2G26730.1	| Symbols: | Leucine-rich repeat protein kinase family protein | chr2:11388621-11391286 FORWARD LENGTH=658	GSEGQtPPGESRtPPR	T6 Phospho, T13 Phospho	98%, 34%	15.97, 0.00	68.1	0.9784	16.73	30.29	2	1811.73	906.872	2	0.00432	2.38	639	654
AT2G26730.1	| Symbols: | Leucine-rich repeat protein kinase family protein | chr2:11388621-11391286 FORWARD LENGTH=658	GSEGQtPPGEsRTPPR	T6 Phospho, S11 Phospho	100%, 100%	66.82, 24.95	117.74	0.9291	9.33	30.25	2	1811.73	604.917	3	0.00556	3.07	639	654
AT1G15280.1	| Symbols: | CASC3/Barentsz eIF4AIII binding | chr1:5252538-5256214 FORWARD LENGTH=584	AVVDsDLsDEEVGTVK	S5 Phospho, S8 Phospho	100%, 100%	143.16, 125.88	229.49	1	85.41	30.33	2	1821.74	911.878	2	0.00834	4.57	45	60
AT1G15280.1	| Symbols: | CASC3/Barentsz eIF4AIII binding | chr1:5252538-5256214 FORWARD LENGTH=584	EAsDDDsDDDDAVR	S3 Phospho, S7 Phospho	100%, 100%	1,000.00, 1,000.00	79.83	0.9985	16.46	25	2	1683.49	842.751	2	0.00416	2.47	25	38
AT5G41970.1	| Symbols: | Metal-dependent protein hydrolase | chr5:16791198-16792961 FORWARD LENGTH=373	VYSTATsPsPSEISVK	S7 Phospho, S9 Phospho	14%, 99%	0.00, 24.95	101.51	0.9207	10.56	31.2	2	1811.77	906.893	2	0.0079	4.36	36	51
AT3G56150.2	| Symbols: EIF3C | eukaryotic translation initiation factor 3C | chr3:20833790-20836820 REVERSE LENGTH=900	YLQsGsEDDDDTDTK	S4 Phospho, S6 Phospho	100%, 100%	42.24, 37.49	157.92	1	42.13	25.22	2	1847.61	924.811	2	0.0049	2.65	35	49
AT3G56150.2	| Symbols: EIF3C | eukaryotic translation initiation factor 3C | chr3:20833790-20836820 REVERSE LENGTH=900	YLQsGsEDDDDTDTKR	S4 Phospho, S6 Phospho	100%, 100%	46.67, 41.91	184.68	0.9989	50.32	27.9	2	2003.71	1002.86	2	0.00742	3.7	35	50
AT5G47430.1	| Symbols: | DWNN domain, a CCHC-type zinc finger | chr5:19235819-19240596 REVERSE LENGTH=892	ALsPTTSVAsKGEK	S3 Phospho, S10 Phospho	100%, 25%	60.18, 0.00	74.08	0.9865	16.47	30.54	2	1534.67	768.344	2	0.00562	3.66	386	399
AT2G26570.1	| Symbols: WEB1 | Plant protein of unknown function (DUF827) | chr2:11299565-11302076 FORWARD LENGTH=807	FSGsPVSTGtPK	S4 Phospho, T10 Phospho	100%, 97%	50.64, 19.53	138.85	0.9987	38.9	28.41	2	1323.52	662.768	2	0.00616	4.65	145	156
AT1G68830.1	| Symbols: STN7 | STT7 homolog STN7 | chr1:25872654-25875473 REVERSE LENGTH=562	TVtEtIDEISDGR	T3 Phospho, T5 Phospho	99%, 100%	18.44, 34.46	111.48	0.9904	19.4	28.89	2	1594.63	798.32	2	0.0097	6.08	537	549
AT1G68830.1	| Symbols: STN7 | STT7 homolog STN7 | chr1:25872654-25875473 REVERSE LENGTH=562	tVTEtIDEISDGR	T1 Phospho, T5 Phospho	100%, 100%	44.63, 46.21	224.08	0.9985	64.56	28.9	2	1594.63	798.32	2	0.00934	5.85	537	549
AT2G39130.1	| Symbols: | Transmembrane amino acid transporter family protein | chr2:16323171-16326744 REVERSE LENGTH=550	LSsQGLLsPIPSR	S3 Phospho, S8 Phospho	100%, 100%	23.19, 31.79	54.28	0.9448	12.64	31.14	2	1513.7	757.858	2	0.00602	3.97	125	137
AT3G58640.2	| Symbols: | Mitogen activated protein kinase kinase kinase-related | chr3:21687153-21692675 REVERSE LENGTH=809	AIsLPSsPQNYR	S3 Phospho, S7 Phospho	100%, 99%	74.63, 23.98	133.83	0.9738	15.78	30	2	1491.62	746.817	2	0.00422	2.83	498	509
AT3G02880.1	| Symbols: | Leucine-rich repeat protein kinase family protein | chr3:634819-636982 FORWARD LENGTH=627	LIEEVSHSSGsPNPVsD	S11 Phospho, S16 Phospho	25%, 100%	0.00, 66.86	88.32	0.9571	14.54	30.34	2	1912.75	957.384	2	0.00506	2.64	611	627
AT1G32490.1	| Symbols: EMB2733, ESP3 | RNA helicase family protein | chr1:11742356-11749286 REVERSE LENGTH=1044	SGQsDEsDGEVAVR	S4 Phospho, S7 Phospho	100%, 100%	38.91, 72.65	107.17	0.9989	27.86	27.09	2	1594.56	798.287	2	0.00532	3.33	132	145
AT2G38280.1	| Symbols: FAC1, ATAMPD | AMP deaminase, putative / myoadenylate deaminase, putative | chr2:16033767-16038793 REVERSE LENGTH=839	TGsFVRPIsPK	S3 Phospho, S9 Phospho	50%, 100%	0.00, 123.58	105.15	0.9405	14.31	30.65	2	1347.61	674.81	2	0.00728	5.4	132	142
AT2G41740.1	| Symbols: VLN2, ATVLN2 | villin 2 | chr2:17410962-17416878 REVERSE LENGTH=976	STssNPADDIPLTEAK	S3 Phospho, S4 Phospho	50%, 50%	0.00, 0.00	146.1	0.9983	38.05	30.23	2	1804.72	903.368	2	0.00472	2.61	855	870
AT2G41740.1	| Symbols: VLN2, ATVLN2 | villin 2 | chr2:17410962-17416878 REVERSE LENGTH=976	StSsNPADDIPLTEAK	T2 Phospho, S4 Phospho	50%, 100%	0.00, 30.97	229.1	0.9988	63.82	30.29	2	1804.72	903.369	2	0.0064	3.54	855	870
AT1G55310.1	| Symbols: SR33, ATSCL33, SCL33, At-SCL33 | SC35-like splicing factor 33 | chr1:20630676-20632695 FORWARD LENGTH=287	GRsLtPVR	S3 Phospho, T5 Phospho	100%, 100%	1,000.00, 1,000.00	49.75	0.9288	2.4	29.43	2	1044.46	523.236	2	0.00458	4.38	200	207
AT1G55310.1	| Symbols: SR33, ATSCL33, SCL33, At-SCL33 | SC35-like splicing factor 33 | chr1:20630676-20632695 FORWARD LENGTH=287	sYtPEPAR	S1 Phospho, T3 Phospho	50%, 100%	0.00, 51.06	92.11	0.9291	10.75	25	2	1079.38	540.695	2	0.00344	3.18	261	268
AT1G55310.1	| Symbols: SR33, ATSCL33, SCL33, At-SCL33 | SC35-like splicing factor 33 | chr1:20630676-20632695 FORWARD LENGTH=287	sGDYYsPPPR	S1 Phospho, S6 Phospho	100%, 100%	65.61, 27.96	146.47	0.9991	28.37	25	2	1297.45	649.731	2	0.00504	3.88	160	169
AT3G63400.3	| Symbols: | Cyclophilin-like peptidyl-prolyl cis-trans isomerase family protein | chr3:23412449-23415435 FORWARD LENGTH=570	SFRsPsPSGVPK	S4 Phospho, S6 Phospho	100%, 100%	23.99, 24.95	186.34	0.9923	22.66	30.09	2	1404.59	703.3	2	0.00236	1.68	400	411
AT3G63400.3	| Symbols: | Cyclophilin-like peptidyl-prolyl cis-trans isomerase family protein | chr3:23412449-23415435 FORWARD LENGTH=570	NFsPGDVsDR	S3 Phospho, S8 Phospho	100%, 100%	1,000.00, 1,000.00	65.93	0.9968	12.85	28.37	2	1252.42	627.218	2	0.00516	4.12	197	206
AT3G63400.3	| Symbols: | Cyclophilin-like peptidyl-prolyl cis-trans isomerase family protein | chr3:23412449-23415435 FORWARD LENGTH=570	NFsPGDVsDREAK	S3 Phospho, S8 Phospho	100%, 100%	1,000.00, 1,000.00	69.37	0.9995	26.96	27.94	2	1580.59	791.305	2	0.00382	2.41	197	209
AT5G10360.1	| Symbols: EMB3010, RPS6B | Ribosomal protein S6e | chr5:3258734-3260142 REVERSE LENGTH=249	sRLsSAPAKPVAA	S1 Phospho, S4 Phospho	0%, 100%	21.94, 57.96	132.34	0.9399	11.59	30.66	2	1413.65	707.831	2	0.00516	3.65	237	249
AT1G50120.1	| Symbols: | FUNCTIONS IN: molecular_function unknown; INVOLVED IN: biological_process unknown; LOCATED IN: cellular_component unknown; EXPRESSED IN: 23 plant structures; EXPRESSED DURING: 13 growth stages; CONTAINS InterPro DOMAIN/s: Rgp1 (InterPro:IPR014848), Immunoglobulin E-set (InterPro:IPR014756); Has 144 Blast hits to 140 proteins in 61 species: Archae - 0; Bacteria - 0; Metazoa - 86; Fung…	TFGssLSLNSGPR	S4 Phospho, S5 Phospho	99%, 99%	23.20, 24.95	158.05	0.9989	61.81	29.53	2	1481.6	741.808	2	0.0059	3.98	261	273
AT1G50120.1	| Symbols: | FUNCTIONS IN: molecular_function unknown; INVOLVED IN: biological_process unknown; LOCATED IN: cellular_component unknown; EXPRESSED IN: 23 plant structures; EXPRESSED DURING: 13 growth stages; CONTAINS InterPro DOMAIN/s: Rgp1 (InterPro:IPR014848), Immunoglobulin E-set (InterPro:IPR014756); Has 144 Blast hits to 140 proteins in 61 species: Archae - 0; Bacteria - 0; Metazoa - 86; Fung…	TFGsSLsLNSGPR	S4 Phospho, S7 Phospho	50%, 100%	0.00, 27.96	195.77	0.9962	51.27	29.8	2	1481.61	741.81	2	0.0103	6.96	261	273
AT1G45688.2	| Symbols: | unknown protein; FUNCTIONS IN: molecular_function unknown; INVOLVED IN: biological_process unknown; LOCATED IN: plasma membrane; EXPRESSED IN: 22 plant structures; EXPRESSED DURING: 13 growth stages; BEST Arabidopsis thaliana protein match is: unknown protein (TAIR:AT5G42860.1); Has 35333 Blast hits to 34131 proteins in 2444 species: Archae - 798; Bacteria - 22429; Metazoa - 974; Fun…	TDSEVTSLAASsPARsPR	S12 Phospho, S16 Phospho	50%, 100%	0.00, 105.44	329.16	1	41.88	31.31	2	1990.85	996.43	2	0.0065	3.26	5	22
AT5G57370.1	| Symbols: | unknown protein; CONTAINS InterPro DOMAIN/s: Protein of unknown function DUF1777 (InterPro:IPR013957); Has 30201 Blast hits to 17322 proteins in 780 species: Archae - 12; Bacteria - 1396; Metazoa - 17338; Fungi - 3422; Plants - 5037; Viruses - 0; Other Eukaryotes - 2996 (source: NCBI BLink). | chr5:23244811-23245470 FORWARD LENGTH=219	RRsPsPDAPSR	S3 Phospho, S5 Phospho	100%, 100%	54.94, 42.94	55.26	0.9405	9.66	29.54	2	1384.57	462.53	3	0.00179	1.29	94	104
AT5G57370.1	| Symbols: | unknown protein; CONTAINS InterPro DOMAIN/s: Protein of unknown function DUF1777 (InterPro:IPR013957); Has 30201 Blast hits to 17322 proteins in 780 species: Archae - 12; Bacteria - 1396; Metazoa - 17338; Fungi - 3422; Plants - 5037; Viruses - 0; Other Eukaryotes - 2996 (source: NCBI BLink). | chr5:23244811-23245470 FORWARD LENGTH=219	RsPsPDAPSR	S2 Phospho, S4 Phospho	100%, 100%	93.90, 45.42	95.42	0.9966	17	26.79	2	1228.46	615.24	2	0.000758	0.617	95	104
AT5G62190.1	| Symbols: PRH75 | DEAD box RNA helicase (PRH75) | chr5:24980542-24983879 REVERSE LENGTH=671	LKLsDsDEEESEK	S4 Phospho, S6 Phospho	100%, 100%	102.00, 84.78	141.19	0.9996	27.39	28.98	2	1667.63	834.821	2	0.00474	2.84	37	49
AT5G04430.2	| Symbols: BTR1, BTR1L | binding to TOMV RNA 1L (long form) | chr5:1250602-1253523 REVERSE LENGTH=334	MEsTESYAAGsPEELAK	S3 Phospho, S11 Phospho	50%, 100%	0.00, 89.54	214.69	0.9831	51.9	29.43	2	1958.75	980.381	2	0.0216	11	1	17
AT5G04430.2	| Symbols: BTR1, BTR1L | binding to TOMV RNA 1L (long form) | chr5:1250602-1253523 REVERSE LENGTH=334	MEStESYAAGsPEELAK	T4 Phospho, S11 Phospho	25%, 100%	0.00, 78.02	146.09	0.9641	24.39	29.32	2	1958.75	980.38	2	0.0199	10.1	1	17
AT5G04430.2	| Symbols: BTR1, BTR1L | binding to TOMV RNA 1L (long form) | chr5:1250602-1253523 REVERSE LENGTH=334	MESTEsYAAGsPEELAK	S6 Phospho, S11 Phospho	25%, 100%	0.00, 86.37	157.94	0.9515	25	29.37	2	1958.75	980.38	2	0.0203	10.3	1	17
AT4G35800.1	| Symbols: NRPB1, RPB1, RNA_POL_II_LSRNA_POL_II_LS, RNA_POL_II_LS | RNA polymerase II large subunit | chr4:16961115-16967892 REVERSE LENGTH=1839	YsPSIAYsPSNAR	S2 Phospho, S8 Phospho	33%, 100%	0.00, 27.96	160.58	0.9988	34.11	29.14	2	1571.61	786.814	2	0.00696	4.42	1733	1745
AT2G41900.1	| Symbols: | CCCH-type zinc finger protein with ARM repeat domain | chr2:17491352-17493502 FORWARD LENGTH=716	TNSsPIVGsPVNNNTWSSK	S4 Phospho, S9 Phospho	33%, 100%	0.00, 84.78	188.48	1	38.11	32.11	2	2147.91	1074.96	2	0.0145	6.76	605	623
AT4G00752.1	| Symbols: | UBX domain-containing protein | chr4:317771-320793 REVERSE LENGTH=469	YsLDNNPSSVLsPR	S2 Phospho, S12 Phospho	25%, 100%	0.00, 39.54	112.44	0.9825	18.78	30.37	2	1707.7	854.858	2	0.0113	6.61	213	226
AT2G37080.1	| Symbols: RIP3 | ROP interactive partner 3 | chr2:15581565-15584057 REVERSE LENGTH=583	TGsLEsPLR	S3 Phospho, S6 Phospho	99%, 100%	20.19, 81.62	70.15	0.9429	10.17	27.28	2	1118.44	560.23	2	0.00366	3.27	535	543
AT2G37080.1	| Symbols: RIP3 | ROP interactive partner 3 | chr2:15581565-15584057 REVERSE LENGTH=583	tGSLEsPLR	T1 Phospho, S6 Phospho	1%, 100%	0.00, 103.68	104.56	0.9966	25.57	27.28	2	1118.44	560.23	2	0.00368	3.29	535	543
AT1G71710.2	| Symbols: | DNAse I-like superfamily protein | chr1:26973796-26976747 REVERSE LENGTH=655	SYsDPPsPGR	S3 Phospho, S7 Phospho	100%, 100%	50.64, 145.62	155.41	0.9991	43.76	25.19	2	1221.41	611.714	2	0.00266	2.17	199	208
AT5G16210.1	| Symbols: | HEAT repeat-containing protein | chr5:5290999-5297779 REVERSE LENGTH=1180	EATESTAPGsPTGQGPEsPK	S10 Phospho, S18 Phospho	100%, 99%	27.96, 23.20	63.57	0.9184	8.59	30.55	2	2086.82	1044.42	2	0.00922	4.42	1123	1142
AT3G10980.1	| Symbols: | PLAC8 family protein | chr3:3438810-3440501 FORWARD LENGTH=563	NIsGASsPSPSR	S3 Phospho, S7 Phospho	79%, 54%	24.95, 21.55	107.96	0.9653	14.78	31.27	2	1318.5	660.258	2	0.00566	4.29	515	526
AT5G51300.1	| Symbols: | splicing factor-related | chr5:20849881-20852295 REVERSE LENGTH=804	TLsGNDKDQsGGEEETTSR	S3 Phospho, S10 Phospho	100%, 100%	25.53, 55.23	147.47	0.9987	36.63	29.87	2	2169.82	724.28	3	0.00799	3.68	75	93
AT5G08610.1	| Symbols: | P-loop containing nucleoside triphosphate hydrolases superfamily protein | chr5:2790341-2794059 FORWARD LENGTH=850	GKFtsDEDNADPEVVR	T4 Phospho, S5 Phospho	100%, 100%	1,000.00, 1,000.00	165.77	1	32.55	29.85	2	1937.75	969.883	2	0.00682	3.52	106	121
AT1G48610.1	| Symbols: | AT hook motif-containing protein | chr1:17971027-17972798 REVERSE LENGTH=212	TALtPPAsGSEVPR	T4 Phospho, S8 Phospho	100%, 100%	38.17, 24.95	109.12	0.9972	33.25	30.47	2	1541.66	771.838	2	0.0086	5.57	4	17
AT4G36500.1	| Symbols: | unknown protein; FUNCTIONS IN: molecular_function unknown; INVOLVED IN: biological_process unknown; LOCATED IN: mitochondrion; EXPRESSED IN: 22 plant structures; EXPRESSED DURING: 13 growth stages; BEST Arabidopsis thaliana protein mat	STsVPYYAPsIK	S3 Phospho, S10 Phospho	100%, 100%	30.97, 46.67	123.15	0.9281	13.2	29.07	2	1471.61	736.813	2	0.0085	5.77	0	0
AT5G50530.1	| Symbols: | CBS / octicosapeptide/Phox/Bemp1 (PB1) domains-containing protein | chr5:20571876-20574922 REVERSE LENGTH=548	SsIsLSGER	S2 Phospho, S4 Phospho	100%, 100%	24.95, 50.64	137.45	0.9964	22.93	26.41	2	1094.41	548.212	2	0.00472	4.31	49	57
AT2G20950.1	| Symbols: | Arabidopsis phospholipase-like protein (PEARLI 4) family | chr2:9003295-9005354 FORWARD LENGTH=520	SAsKSNPSsPPHLAEGR	S3 Phospho, S9 Phospho	40%, 40%	0.00, 0.00	108.87	0.9849	18.76	31.04	2	1880.78	941.4	2	0.00304	1.61	22	38
AT5G02850.1	| Symbols: | hydroxyproline-rich glycoprotein family protein | chr5:652159-653439 FORWARD LENGTH=426	LGLTGPGsPSVQNPtPTR	S8 Phospho, T15 Phospho	49%, 100%	0.00, 23.99	82.67	0.9936	23	31.85	2	1937.87	969.945	2	0.0097	5	13	30
AT4G36750.1	| Symbols: | Quinone reductase family protein | chr4:17324642-17326215 FORWARD LENGTH=273	TTATNtGGtTTPAITTTAAK	T6 Phospho, T9 Phospho	99%, 0%	24.95, 0.00	218.58	0.9993	58.91	32.11	2	2038.9	1020.46	2	0.0118	5.79	49	68
AT4G36750.1	| Symbols: | Quinone reductase family protein | chr4:17324642-17326215 FORWARD LENGTH=273	TTAtNtGGTTTPAITTTAAK	T4 Phospho, T6 Phospho	49%, 49%	0.00, 0.00	104.66	0.9653	21.13	32.12	2	2038.9	1020.46	2	0.015	7.36	49	68
AT5G20900.1	| Symbols: JAZ12, TIFY3B | jasmonate-zim-domain protein 12 | chr5:7090883-7092201 FORWARD LENGTH=187	NStSISPVSsPALNR	T3 Phospho, S10 Phospho	1%, 97%	0.00, 20.98	134.12	0.9853	17.3	31.03	2	1688.72	845.369	2	0.00706	4.18	92	106
AT5G20900.1	| Symbols: JAZ12, TIFY3B | jasmonate-zim-domain protein 12 | chr5:7090883-7092201 FORWARD LENGTH=187	NSTSIsPVSsPALNR	S6 Phospho, S10 Phospho	100%, 98%	42.13, 21.95	158.53	0.997	26.85	31	2	1688.72	845.369	2	0.00654	3.87	92	106
AT5G20900.1	| Symbols: JAZ12, TIFY3B | jasmonate-zim-domain protein 12 | chr5:7090883-7092201 FORWARD LENGTH=187	NSTsISPVSsPALNR	S4 Phospho, S10 Phospho	21%, 21%	0.00, 0.00	116.47	0.9682	14.92	31.01	2	1688.72	845.369	2	0.0065	3.85	92	106
AT5G12080.1	| Symbols: MSL10, ATMSL10 | mechanosensitive channel of small conductance-like 10 | chr5:3898182-3900923 REVERSE LENGTH=734	sVGsPAPVTPSK	S1 Phospho, S4 Phospho	100%, 100%	168.56, 81.62	172.94	1	43.01	29.01	2	1285.54	643.778	2	0.00528	4.1	128	139
AT1G77840.1	| Symbols: | Translation initiation factor IF2/IF5 | chr1:29269087-29270400 FORWARD LENGTH=437	NHssDEDISPK	S3 Phospho, S4 Phospho	100%, 100%	84.93, 88.65	123.87	0.9987	14.09	26.09	2	1387.47	694.744	2	0.00384	2.76	198	208
AT3G17410.1	| Symbols: | Protein kinase superfamily protein | chr3:5956601-5958882 FORWARD LENGTH=364	sAPQtPHRNPY	S1 Phospho, T5 Phospho	100%, 100%	71.22, 81.07	58.93	0.9989	14.72	27.9	2	1426.55	714.282	2	0.0056	3.92	354	364
AT4G18120.2	| Symbols: AML3, ML3 | MEI2-like 3 | chr4:10038878-10041950 FORWARD LENGTH=730	sPIFGNLsPTK	S1 Phospho, S8 Phospho	100%, 100%	89.06, 24.95	75.09	0.9837	14.86	29.86	2	1319.56	660.787	2	0.00378	2.86	349	359
AT4G21780.1	| Symbols: | unknown protein; Has 30201 Blast hits to 17322 proteins in 780 species: Archae - 12; Bacteria - 1396; Metazoa - 17338; Fungi - 3422; Plants - 5037; Viruses - 0; Other Eukaryotes - 2996 (source: NCBI BLink). | chr4:11567213-11567560 FORWARD LENGTH=115	GNsEENKNtFKQR	S3 Phospho, T9 Phospho	100%, 100%	1,000.00, 1,000.00	129	0.9971	20.91	29.96	2	1710.68	856.345	2	-0.000442	-0.258	39	51
AT4G35100.1	| Symbols: PIP3, PIP3A, PIP2;7, SIMIP | plasma membrane intrinsic protein 3 | chr4:16708672-16709958 FORWARD LENGTH=280	ALGsFRsNATN	S4 Phospho, S7 Phospho	100%, 100%	81.07, 46.67	115.1	0.9991	21.28	28.08	2	1296.49	649.255	2	0.00452	3.48	270	280
AT3G49601.1	| Symbols: | FUNCTIONS IN: molecular_function unknown; INVOLVED IN: biological_process unknown; LOCATED IN: cellular_component unknown; CONTAINS InterPro DOMAIN/s: mRNA splicing factor, Cwf21 (InterPro:IPR013170); Has 30201 Blast hits to 17322 proteins in 780 species: Archae - 12; Bacteria - 1396; Metazoa - 17338; Fungi - 3422; Plants - 5037; Viruses - 0; Other Eukaryotes - 2996 (source: NCBI BLi…	AARDsDDsEIEYQNK	S5 Phospho, S8 Phospho	100%, 100%	55.43, 53.49	123.78	0.9987	20.32	28.54	2	1899.7	950.856	2	0.00534	2.81	391	405
AT5G16590.1	| Symbols: LRR1 | Leucine-rich repeat protein kinase family protein | chr5:5431862-5433921 FORWARD LENGTH=625	SPAsPGPLsD	S4 Phospho, S9 Phospho	100%, 100%	40.66, 72.29	43.96	0.9323	9.19	25.12	2	1086.37	544.193	2	0.00504	4.63	616	625
AT3G17840.1	| Symbols: RLK902 | receptor-like kinase 902 | chr3:6106092-6108430 FORWARD LENGTH=647	LNGLtGsLPLDLGScSDLR	T5 Phospho, S7 Phospho	50%, 50%	0.00, 0.00	29.41	0.9943	21.66	32.21	2	2146.94	716.653	3	-0.00161	-0.751	104	122
AT4G35785.1	| Symbols: | RNA-binding (RRM/RBD/RNP motifs) family protein | chr4:16953211-16955127 REVERSE LENGTH=238	sLPRPVsPSR	S1 Phospho, S7 Phospho	99%, 100%	21.95, 27.96	42.58	0.9806	11.65	29.85	2	1254.56	628.287	2	0.00612	4.87	43	52
AT1G23860.1	| Symbols: SRZ-21, SRZ21, RSZP21, RSZ21, At-RSZ21 | RS-containing zinc finger protein 21 | chr1:8428091-8429164 REVERSE LENGTH=187	RRsVtPPR	S3 Phospho, T5 Phospho	100%, 100%	1,000.00, 1,000.00	59.57	0.99	21.45	29.47	2	1127.5	376.841	3	7.21e-05	0.0639	144	151
AT3G07790.1	| Symbols: | DGCR14-related | chr3:2487491-2489017 FORWARD LENGTH=508	GAsPGAVtPK	S3 Phospho, T8 Phospho	100%, 100%	1,000.00, 1,000.00	108.38	0.9979	15.74	27.33	2	1043.41	522.713	2	0.00172	1.64	479	488
AT2G24590.1	| Symbols: RSZ22a, At-RSZ22a | RNA recognition motif and CCHC-type zinc finger domains containing protein | chr2:10449837-10450860 FORWARD LENGTH=196	NYsRsPPPYR	S3 Phospho, S5 Phospho	99%, 97%	23.19, 18.44	78.96	0.9933	15.54	28.41	2	1395.54	698.779	2	0.00602	4.31	166	175
AT1G02840.1	| Symbols: SR1, ATSRP34, SRP34, SR34, At-SR34 | RNA-binding (RRM/RBD/RNP motifs) family protein | chr1:626918-629583 FORWARD LENGTH=303	sRsPLPSVQK	S1 Phospho, S3 Phospho	100%, 100%	132.33, 117.49	165.24	0.9974	23.25	29.68	2	1257.56	629.786	2	0.00634	5.04	271	280
AT1G67590.1	| Symbols: | Remorin family protein | chr1:25333137-25334472 REVERSE LENGTH=347	sPVtSPVR	S1 Phospho, T4 Phospho	100%, 50%	70.16, 0.00	104.31	0.9272	10.01	27.16	2	1001.4	501.708	2	0.00376	3.75	180	187
AT1G67590.1	| Symbols: | Remorin family protein | chr1:25333137-25334472 REVERSE LENGTH=347	sPVTsPVR	S1 Phospho, S5 Phospho	100%, 50%	75.44, 0.00	96.51	0.9406	11.13	27.13	2	1001.4	501.709	2	0.00404	4.03	180	187
AT4G25880.3	| Symbols: APUM6, PUM6 | pumilio 6 | chr4:13155518-13159070 FORWARD LENGTH=858	LsPGSQsLADFR	S2 Phospho, S7 Phospho	100%, 50%	24.44, 0.00	114.36	0.9838	16.49	29.39	2	1436.58	719.297	2	0.00536	3.73	153	164
AT1G56290.1	| Symbols: | CwfJ-like family protein | chr1:21075939-21078608 FORWARD LENGTH=692	NVsVsPVETR	S3 Phospho, S5 Phospho	100%, 100%	106.01, 63.52	118.5	0.9781	11.15	28.1	2	1246.5	624.26	2	0.00496	3.97	301	310
AT1G19350.4	| Symbols: BES1, BZR2 | Brassinosteroid signalling positive regulator (BZR1) family protein | chr1:6688841-6690165 FORWARD LENGTH=335	IsNSAPVTPPVSSPTsR	S2 Phospho, S16 Phospho	2%, 2%	0.00, 0.00	98.61	0.9343	13.29	31.67	2	1855.82	928.915	2	0.00394	2.12	168	184
AT1G19350.4	| Symbols: BES1, BZR2 | Brassinosteroid signalling positive regulator (BZR1) family protein | chr1:6688841-6690165 FORWARD LENGTH=335	ISNSAPVtPPVsSPTSR	T8 Phospho, S12 Phospho	29%, 29%	0.00, 0.00	113.62	0.9331	18.53	31.57	2	1237.21	619.613	2	-619	67.1	168	184
AT1G19350.4	| Symbols: BES1, BZR2 | Brassinosteroid signalling positive regulator (BZR1) family protein | chr1:6688841-6690165 FORWARD LENGTH=335	ISNsAPVtPPVSSPTSR	S4 Phospho, T8 Phospho	93%, 2%	18.44, 0.00	106.23	0.9204	14.23	31.48	2	1855.81	928.915	2	0.00298	1.6	168	184
AT4G33060.1	| Symbols: | Cyclophilin-like peptidyl-prolyl cis-trans isomerase family protein | chr4:15948535-15951954 FORWARD LENGTH=504	SDAVssEDEKPR	S5 Phospho, S6 Phospho	100%, 100%	72.20, 68.41	156.02	0.9987	28.36	27.77	2	1478.54	740.277	2	0.00736	4.97	338	349
AT4G25650.2	| Symbols: ACD1-LIKE, PTC52, TIC55-IV | ACD1-like | chr4:13081021-13083153 REVERSE LENGTH=559	WFNKysEAR	Y5 Phospho, S6 Phospho	100%, 100%	1,000.00, 1,000.00	55.87	0.9828	14.67	27.75	2	1359.51	680.764	2	0.00886	6.51	443	451
AT4G14740.2	| Symbols: | Plant protein of unknown function (DUF828) with plant pleckstrin homology-like region | chr4:8450567-8453946 REVERSE LENGTH=475	ILSHsQEVsPR	S5 Phospho, S9 Phospho	100%, 100%	43.29, 98.73	131	0.9704	13.53	29.89	2	1411.59	706.804	2	0.00414	2.93	100	110
AT3G07180.1	| Symbols: | GPI transamidase component PIG-S-related | chr3:2282455-2285475 REVERSE LENGTH=599	stDPDNLR	S1 Phospho, T2 Phospho	100%, 100%	1,000.00, 1,000.00	69.22	0.9831	12.41	25	2	1076.36	539.188	2	0.00274	2.54	91	98
AT5G61150.2	| Symbols: VIP4 | leo1-like family protein | chr5:24603846-24607528 REVERSE LENGTH=623	GIEsDEEEsPPR	S4 Phospho, S9 Phospho	100%, 100%	1,000.00, 1,000.00	103.99	0.9989	16.48	27.25	2	1503.52	752.768	2	0.00502	3.34	595	606
AT3G61050.2	| Symbols: NTMC2TYPE4, NTMC2T4 | Calcium-dependent lipid-binding (CaLB domain) family protein | chr3:22597485-22600932 FORWARD LENGTH=510	SGSstPVNTVPENDGAK	S4 Phospho, T5 Phospho	50%, 50%	0.00, 0.00	153.58	0.9962	29.76	29.53	2	1818.71	910.364	2	0.0058	3.19	492	508
AT2G27090.1	| Symbols: | Protein of unknown function (DUF630 and DUF632) | chr2:11567691-11570345 REVERSE LENGTH=743	SKTPELsPPVtPLVATPVNK	S7 Phospho, T11 Phospho	98%, 4%	18.95, 0.00	147.21	0.9964	28.25	31.4	2	2234.11	745.71	3	0.0079	3.54	273	292
AT3G10550.1	| Symbols: MTM1, AtMTM1 | Myotubularin-like phosphatases II superfamily | chr3:3293210-3298452 REVERSE LENGTH=840	ysEMQKEK	Y1 Phospho, S2 Phospho	100%, 100%	1,000.00, 1,000.00	35.99	0.942	12.17	25.34	2	1201.42	601.715	2	0.0036	2.99	675	682
AT5G15270.2	| Symbols: | RNA-binding KH domain-containing protein | chr5:4958738-4960947 FORWARD LENGTH=548	VVADDARsEDsPEGEK	S8 Phospho, S11 Phospho	100%, 100%	1,000.00, 1,000.00	166.64	0.9996	24.92	28.65	2	1862.7	932.359	2	0.00566	3.04	130	145
AT4G11000.1	| Symbols: | Ankyrin repeat family protein | chr4:6731020-6732464 FORWARD LENGTH=406	DRsINAsDPR	S3 Phospho, S7 Phospho	100%, 100%	1,000.00, 1,000.00	54.25	0.9925	14.11	26.76	2	1289.48	645.749	2	0.00214	1.66	242	251
AT5G53830.1	| Symbols: | VQ motif-containing protein | chr5:21857057-21857788 FORWARD LENGTH=243	LGLNsPVtPLR	S5 Phospho, T8 Phospho	100%, 100%	1,000.00, 1,000.00	67.79	0.9735	9.58	30.45	2	1325.62	663.818	2	0.00586	4.42	174	184
AT3G53420.2	| Symbols: PIP2A, PIP2, PIP2;1 | plasma membrane intrinsic protein 2A | chr3:19803906-19805454 REVERSE LENGTH=287	SLGsFRsAANV	S4 Phospho, S7 Phospho	100%, 100%	42.42, 52.75	105.6	0.9986	28.33	28.06	2	1267.51	634.76	2	0.00646	5.09	277	287
AT1G77500.1	| Symbols: | Protein of unknown function (DUF630 and DUF632) | chr1:29121753-29124937 FORWARD LENGTH=879	ISsLSSLSIHAtR	S3 Phospho, T12 Phospho	33%, 98%	0.00, 17.20	78.52	0.9356	20.36	30.59	2	1530.67	766.343	2	-0.0134	-8.75	437	449
AT3G27300.1	| Symbols: G6PD5 | glucose-6-phosphate dehydrogenase 5 | chr3:10083318-10086288 REVERSE LENGTH=516	StLKNDsFVK	T2 Phospho, S7 Phospho	50%, 100%	0.00, 23.57	40.1	0.9496	12.28	28.67	2	1297.54	649.778	2	0.00516	3.97	12	21
AT4G26830.1	| Symbols: | O-Glycosyl hydrolases family 17 protein | chr4:13494726-13496487 REVERSE LENGTH=455	KSttPVNGNR	T3 Phospho, T4 Phospho	100%, 100%	27.96, 86.89	115.72	0.959	14.83	28.58	2	1232.5	617.258	2	0.0069	5.59	346	355
AT5G44260.1	| Symbols: | Zinc finger C-x8-C-x5-C-x3-H type family protein | chr5:17829974-17831119 REVERSE LENGTH=381	sPSSVSsPLR	S1 Phospho, S7 Phospho	99%, 25%	21.95, 0.00	108.14	0.9549	15.08	27.54	2	1175.47	588.742	2	0.00672	5.71	29	38
AT5G44180.1	| Symbols: | Homeodomain-like transcriptional regulator | chr5:17783172-17789872 FORWARD LENGTH=1694	QHGIsIsNDAATR	S5 Phospho, S7 Phospho	100%, 100%	53.81, 57.17	57.5	0.9846	19.25	29.2	2	1528.6	765.307	2	-0.00838	-5.48	1662	1674
AT3G13990.1	| Symbols: | Kinase-related protein of unknown function (DUF1296) | chr3:4625708-4630383 REVERSE LENGTH=848	SDsPVSAVsEPQLPEQK	S3 Phospho, S9 Phospho	50%, 50%	0.00, 0.00	45.2	0.992	20.64	31.02	2	1956.82	979.419	2	0.0113	5.79	494	510
AT4G34340.1	| Symbols: TAF8 | TBP-associated factor 8 | chr4:16426771-16427832 REVERSE LENGTH=353	SVssGEKVESLNR	S3 Phospho, S4 Phospho	99%, 99%	22.23, 20.02	113.36	0.9819	21.46	29.76	2	1550.64	776.326	2	9.81e-05	0.0632	246	258
AT3G51950.2	| Symbols: | Zinc finger (CCCH-type) family protein / RNA recognition motif (RRM)-containing protein | chr3:19278244-19280407 REVERSE LENGTH=540	ELsPTGLDSsPR	S3 Phospho, S10 Phospho	100%, 50%	50.64, 0.00	120.71	0.947	12.18	28.14	2	1417.56	709.786	2	0.0043	3.03	350	361
AT3G46990.1	| Symbols: | Protein of unknown function (DUF740) | chr3:17311901-17313544 FORWARD LENGTH=547	NAsVSVsDQPR	S3 Phospho, S7 Phospho	67%, 67%	0.00, 0.00	14.83	0.9582	9.05	27.5	2	1318.5	660.257	2	0.0049	3.71	65	75
AT5G65590.1	| Symbols: | Dof-type zinc finger DNA-binding family protein | chr5:26212084-26213034 REVERSE LENGTH=316	NLEIVNsSSPSsPTK	S7 Phospho, S12 Phospho	33%, 33%	0.00, 0.00	208.33	0.9821	16.68	30.74	2	1718.72	860.368	2	0.00508	2.95	252	266
AT5G53440.1	| Symbols: | unknown protein; FUNCTIONS IN: molecular_function unknown; INVOLVED IN: biological_process unknown; LOCATED IN: cytosol; EXPRESSED IN: 25 plant structures; EXPRESSED DURING: 15 growth stages; Has 1807 Blast hits to 1807 proteins in 277 species: Archae - 0; Bacteria - 0; Metazoa - 736; Fungi - 347; Plants - 385; Viruses - 0; Other Eukaryotes - 339 (source: NCBI BLink). | chr5:21683679…	KDLsEDENmEEAEEK	S4 Phospho, M9 Oxidation	100%, 100%	1,000.00, 1,000.00	140.56	0.9992	22.2	32.97	2	1890.71	946.364	2	0.00533	2.82	1114	1128
AT1G19870.1	| Symbols: iqd32 | IQ-domain 32 | chr1:6895400-6898539 REVERSE LENGTH=794	FmQPTQsAK	M2 Oxidation, S7 Phospho	100%, 100%	1,000.00, 23.20	74.25	0.9987	23.93	28.12	2	1132.47	567.241	2	0.00555	4.9	726	734
AT1G01320.2	| Symbols: | Tetratricopeptide repeat (TPR)-like superfamily protein | chr1:121582-130099 REVERSE LENGTH=1787	EmSEEDTEETGsEEGK	M2 Oxidation, S12 Phospho	100%, 48%	1,000.00, 0.00	43.68	0.9985	21.48	26.3	2	1881.64	941.827	2	0.00467	2.48	1172	1187
AT5G58140.1	| Symbols: PHOT2, NPL1 | phototropin 2 | chr5:23524771-23529993 FORWARD LENGTH=915	SQVQESVSNDTmVKPDSSTtPTPGR	M12 Oxidation, T20 Phospho	100%, 23%	1,000.00, 0.00	123.28	0.9172	12.85	33.09	2	2743.21	915.41	3	0.00677	2.47	284	308
AT1G17210.1	| Symbols: ATILP1, ILP1 | IAP-like protein 1 | chr1:5880502-5884657 REVERSE LENGTH=958	SDPFsEGNEQVmAFPGAR	S5 Phospho, M12 Oxidation	99%, 100%	22.53, 1,000.00	146.75	0.9974	35.44	30.92	2	2033.82	1017.92	2	0.00393	1.93	566	583
AT1G29400.2	| Symbols: AML5, ML5 | MEI2-like protein 5 | chr1:10290393-10293696 REVERSE LENGTH=800	NmDLLDSQLsDDDGR	M2 Oxidation, S10 Phospho	100%, 100%	1,000.00, 63.60	279.44	1	71.7	30.47	2	1788.72	895.368	2	0.0335	18.7	783	797
AT1G29400.2	| Symbols: AML5, ML5 | MEI2-like protein 5 | chr1:10290393-10293696 REVERSE LENGTH=800	NmDLLDSQLsDDDGRER	M2 Oxidation, S10 Phospho	100%, 50%	1,000.00, 0.00	95.72	0.9544	13.53	31.2	2	2073.84	692.287	3	0.00776	3.74	783	799
AT3G45780.2	| Symbols: PHOT1, NPH1, JK224, RPT1 | phototropin 1 | chr3:16818557-16823960 FORWARD LENGTH=996	SSGEmsDGDVPGGR	M5 Oxidation, S6 Phospho	100%, 100%	1,000.00, 138.72	280.62	1	98.96	26.92	2	1445.52	723.766	2	0.00373	2.58	165	178
AT5G03730.1	| Symbols: CTR1, SIS1, AtCTR1 | Protein kinase superfamily protein | chr5:974958-979660 REVERSE LENGTH=821	sAAGTPEWmAPEVLR	S1 Phospho, M9 Oxidation	99%, 100%	20.20, 1,000.00	118.6	0.9951	21.55	31.29	2	1709.76	855.885	2	0.00755	4.42	710	724
AT3G17900.1	| Symbols: | unknown protein; FUNCTIONS IN: molecular_function unknown; INVOLVED IN: biological_process unknown; LOCATED IN: cellular_component unknown; EXPRESSED IN: 23 plant structures; EXPRESSED DURING: 13 growth stages; Has 45 Blast hits to 44 proteins in 14 species: Archae - 0; Bacteria - 0; Metazoa - 2; Fungi - 2; Plants - 39; Viruses - 0; Other Eukaryotes - 2 (source: NCBI BLink). | chr3:6…	SYSmsALPPNTAPVTGPIK	M4 Oxidation, S5 Phospho	100%, 25%	1,000.00, 0.00	68.49	0.98	16.93	31.96	2	2025.96	1013.98	2	0.00683	3.37	400	418
AT3G22520.1	| Symbols: | unknown protein; INVOLVED IN: biological_process unknown; LOCATED IN: chloroplast stroma, chloroplast, chloroplast envelope; EXPRESSED IN: 24 plant structures; EXPRESSED DURING: 13 growth stages; BEST Arabidopsis thaliana protein match	DSSVLVSVSsPmR	S10 Phospho, M12 Oxidation	99%, 100%	21.95, 1,000.00	205.48	0.9912	27.08	30.48	2	1458.64	730.329	2	0.00165	1.13	0	0
AT5G22000.1	| Symbols: RHF2A | RING-H2 group F2A | chr5:7277436-7279553 FORWARD LENGTH=375	NTsmADLGSEVK	S3 Phospho, M4 Oxidation	99%, 100%	22.52, 1,000.00	145.51	0.9868	33.85	28.33	2	1346.54	674.277	2	-0.00359	-2.66	292	303
AT1G55340.1	| Symbols: | Protein of unknown function (DUF1639) | chr1:20652605-20653469 FORWARD LENGTH=205	SFmAsPEKEDR	M3 Oxidation, S5 Phospho	100%, 100%	1,000.00, 37.88	86.68	0.9884	16.56	28.83	2	1391.55	696.782	2	0.00729	5.24	84	94
AT5G23900.1	| Symbols: | Ribosomal protein L13e family protein | chr5:8064176-8065081 REVERSE LENGTH=206	AGDSTPEELANAtQVQGDYmPIASVK	T13 Phospho, M20 Oxidation	33%, 100%	0.00, 1,000.00	187.6	0.9975	44.87	33.48	2	2787.24	930.087	3	0.00888	3.18	134	159
AT1G48410.3	| Symbols: AGO1 | Stabilizer of iron transporter SufD / Polynucleotidyl transferase | chr1:17886285-17891892 REVERSE LENGTH=1050	FYmEPEtSDSGSmASGSmAR	M3 Oxidation, T7 Phospho, M13 Oxidation, M18 Oxidation	100%, 33%, 100%, 100%	1,000.00, 0.00, 1,000.00, 1,000.00	165.08	0.9962	21.33	28.49	2	2267.81	1134.91	2	0.0078	3.44	996	1015
AT1G16860.1	| Symbols: | Ubiquitin-specific protease family C19-related protein | chr1:5768280-5770183 FORWARD LENGTH=474	mSGSLASAGSVsmK	M1 Oxidation, S12 Phospho, M13 Oxidation	100%, 0%, 100%	1,000.00, 0.00, 1,000.00	110.22	0.9993	32.74	29.39	2	1423.58	712.797	2	0.00644	4.52	94	107
AT3G28920.1	| Symbols: AtHB34, HB34, ZHD9 | homeobox protein 34 | chr3:10940598-10941536 REVERSE LENGTH=312	SmDmTPKsPEPESETPTR	M2 Oxidation, M4 Oxidation, S8 Phospho	100%, 100%, 100%	1,000.00, 1,000.00, 26.20	95.49	0.9988	19.44	31.04	2	2130.86	1066.44	2	0.00672	3.15	6	23
AT1G78880.1	| Symbols: | Ubiquitin-specific protease family C19-related protein | chr1:29653068-29654819 REVERSE LENGTH=468	mSGNLASAGSNsmK	M1 Oxidation, S12 Phospho, M13 Oxidation	100%, 33%, 100%	1,000.00, 0.00, 1,000.00	109.06	0.9222	9.71	28.21	2	1465.56	733.79	2	0.00672	4.58	88	101
AT1G78880.1	| Symbols: | Ubiquitin-specific protease family C19-related protein | chr1:29653068-29654819 REVERSE LENGTH=468	mSGNLASAGsNSmK	M1 Oxidation, S10 Phospho, M13 Oxidation	100%, 33%, 100%	1,000.00, 0.00, 1,000.00	118.51	0.9761	17.83	27.85	2	1465.56	733.787	2	0.002	1.36	88	101
AT5G03660.2	| Symbols: | Family of unknown function (DUF662) | chr5:938068-939811 FORWARD LENGTH=151	DQLSESmsFSSQmK	M7 Oxidation, S8 Phospho, M13 Oxidation	100%, 100%, 100%	1,000.00, 23.20, 1,000.00	247.84	0.9991	50.34	28.66	2	1715.65	858.831	2	0.00526	3.06	20	33
AT2G21230.1	| Symbols: | Basic-leucine zipper (bZIP) transcription factor family protein | chr2:9093920-9096059 REVERSE LENGTH=519	SVsmDScFmGK	S3 Phospho, M4 Oxidation, M9 Oxidation	99%, 100%, 100%	22.23, 1,000.00, 1,000.00	115.21	0.9589	13.72	25.82	2	1359.46	680.737	2	0.00397	2.92	298	308
AT2G25430.1	| Symbols: | epsin N-terminal homology (ENTH) domain-containing protein / clathrin assembly protein-related | chr2:10822716-10824677 FORWARD LENGTH=653	sYGDmTEmGGGGGGGGR	S1 Phospho, M5 Oxidation, M8 Oxidation	49%, 100%, 100%	0.00, 1,000.00, 1,000.00	141.17	0.9962	28.04	25.19	2	1656.56	829.288	2	0.0057	3.44	221	237
AT2G25430.1	| Symbols: | epsin N-terminal homology (ENTH) domain-containing protein / clathrin assembly protein-related | chr2:10822716-10824677 FORWARD LENGTH=653	SRSYGDmtEmGGGGGGGGR	M7 Oxidation, T8 Phospho, M10 Oxidation	100%, 25%, 100%	1,000.00, 0.00, 1,000.00	99.35	0.9961	20.56	28.46	2	1899.69	634.239	3	0.00582	3.06	219	237
AT1G52780.1	| Symbols: | Protein of unknown function (DUF2921) | chr1:19658846-19662025 FORWARD LENGTH=1059	VmsESEmVSGAR	M2 Oxidation, S3 Phospho, M7 Oxidation	100%, 100%, 100%	1,000.00, 46.21, 1,000.00	157.68	0.9989	22.7	27.75	2	1393.53	697.772	2	0.00482	3.45	1039	1050
AT1G70180.1	| Symbols: | Sterile alpha motif (SAM) domain-containing protein | chr1:26426768-26428985 FORWARD LENGTH=456	NmGSYmSSSQGFsPPR	M2 Oxidation, M6 Oxidation, S13 Phospho	100%, 100%, 100%	1,000.00, 1,000.00, 24.95	118.2	0.929	11.35	28.62	2	1843.69	922.854	2	0.00368	1.99	294	309
AT5G05010.2	| Symbols: | clathrin adaptor complexes medium subunit family protein | chr5:1477137-1479872 FORWARD LENGTH=527	NKPGGFSSmGsmGSGR	M9 Oxidation, S11 Phospho, M12 Oxidation	100%, 100%, 100%	1,000.00, 30.78, 1,000.00	109.21	0.9987	38.21	29.31	2	1667.65	556.891	3	0.00801	4.8	174	189
AT1G45249.3	| Symbols: ABF2 | abscisic acid responsive elements-binding factor 2 | chr1:17165420-17167415 REVERSE LENGTH=427	DFGsmNmDELLK	S4 Phospho, M5 Oxidation, M7 Oxidation	100%, 100%, 100%	1,000.00, 1,000.00, 1,000.00	106.07	0.9986	17.47	27.92	2	1510.58	756.297	2	0.00762	5.04	42	53
AT3G15040.1	| Symbols: | Protein of unknown function, DUF584 | chr3:5065445-5066176 REVERSE LENGTH=243	YPQsAPVQVPLVSSAmmNR	S4 Phospho, M16 Oxidation, M17 Oxidation	50%, 100%, 100%	0.00, 1,000.00, 1,000.00	116.96	0.9267	11.44	32.52	2	2186	729.674	3	0.00869	3.97	154	172
AT5G52200.2	| Symbols: | phosphoprotein phosphatase inhibitors | chr5:21202818-21204017 REVERSE LENGTH=211	TPYHPmmDDDGSLsPR	M6 Oxidation, M7 Oxidation, S14 Phospho	100%, 100%, 98%	1,000.00, 1,000.00, 17.99	136.57	0.9948	28.43	29.18	2	1929.73	644.25	3	0.00152	0.788	54	69
AT3G55005.1	| Symbols: TON1B | tonneau 1b (TON1b) | chr3:20384131-20386193 FORWARD LENGTH=257	FENmTQVmGGsSR	M4 Oxidation, M8 Oxidation, S11 Phospho	100%, 100%, 100%	1,000.00, 1,000.00, 24.95	69.91	0.9982	24.34	28.34	2	1554.59	778.301	2	0.00388	2.49	143	155
AT4G36970.1	| Symbols: | Remorin family protein | chr4:17429826-17431459 REVERSE LENGTH=427	AEmTTAmQsPVVSR	M3 Oxidation, M7 Oxidation, S9 Phospho	100%, 100%, 100%	1,000.00, 1,000.00, 23.99	127.03	0.9968	17.11	30.86	2	1618.68	810.348	2	0.0081	5	211	224
AT3G03380.1	| Symbols: DegP7 | DegP protease 7 | chr3:799720-808319 FORWARD LENGTH=1097	LGsQASmATESVmK	S3 Phospho, M7 Oxidation, M13 Oxidation	100%, 100%, 100%	50.19, 1,000.00, 1,000.00	145.36	1	46.25	29.71	2	1550.64	776.327	2	0.00418	2.69	0	0
AT4G28880.1	| Symbols: ckl3 | casein kinase I-like 3 | chr4:14251351-14254048 FORWARD LENGTH=415	NmNmPSTSLsPAGTSK	M2 Oxidation, M4 Oxidation, S10 Phospho	100%, 100%, 24%	1,000.00, 1,000.00, 0.00	86.29	0.9207	10.58	30.37	2	1733.71	867.861	2	0.00804	4.63	371	386
AT1G31870.2	| Symbols: | unknown protein; FUNCTIONS IN: molecular_function unknown; INVOLVED IN: biological_process unknown; LOCATED IN: cytosol, nucleus; EXPRESSED IN: 25 plant structures; EXPRESSED DURING: 15 growth stages; CONTAINS InterPro DOMAIN/s: Protein of unknown function DUF2050, pre-mRNA-splicing factor (InterPro:IPR018609); Has 35333 Blast hits to 34131 proteins in 2444 species: Archae - 798; Bac…	VDTDmsPPR	M5 Oxidation, S6 Phospho	100%, 100%	1,000.00, 96.21	200.5	1	46.97	27.07	2	1112.43	557.22	2	0.00443	3.98	143	151
AT2G37340.2	| Symbols: RSZ33, RS2Z33, AT-RS2Z33 | arginine/serine-rich zinc knuckle-containing protein 33 | chr2:15670372-15671477 REVERSE LENGTH=260	mDDSLsPR	M1 Oxidation, S6 Phospho	100%, 99%	1,000.00, 20.19	140.03	0.99	36.04	25.29	2	1015.37	508.694	2	0.00439	4.32	169	176
AT4G39680.1	| Symbols: | SAP domain-containing protein | chr4:18414604-18416938 REVERSE LENGTH=633	TsVGGGDDSNAANADmIK	S2 Phospho, M16 Oxidation	33%, 100%	0.00, 1,000.00	156.16	0.9884	27.04	29.92	2	1817.72	909.865	2	0.00119	0.656	284	301
AT4G39680.1	| Symbols: | SAP domain-containing protein | chr4:18414604-18416938 REVERSE LENGTH=633	TSVGGGDDsNAANADmIK	S9 Phospho, M16 Oxidation	92%, 100%	35.64, 1,000.00	183.34	1	69.78	30.37	2	1817.72	909.867	2	0.00547	3.01	284	301
AT2G46630.1	| Symbols: | unknown protein; LOCATED IN: chloroplast; EXPRESSED IN: 22 plant structures; EXPRESSED DURING: 13 growth stages; Has 110095 Blast hits to 59224 proteins in 2216 species: Archae - 177; Bacteria - 15429; Metazoa - 38345; Fungi - 18843; Plants - 13341; Viruses - 3084; Other Eukaryotes - 20876 (source: NCBI BLink). | chr2:19145529-19146713 FORWARD LENGTH=394	QPSsSDSENImSTR	S4 Phospho, M11 Oxidation	33%, 100%	0.00, 1,000.00	208.36	0.9976	52.01	29.2	2	1633.64	817.827	2	0.01	6.13	250	263
AT2G46630.1	| Symbols: | unknown protein; LOCATED IN: chloroplast; EXPRESSED IN: 22 plant structures; EXPRESSED DURING: 13 growth stages; Has 110095 Blast hits to 59224 proteins in 2216 species: Archae - 177; Bacteria - 15429; Metazoa - 38345; Fungi - 18843; Plants - 13341; Viruses - 3084; Other Eukaryotes - 20876 (source: NCBI BLink). | chr2:19145529-19146713 FORWARD LENGTH=394	QPSSsDSENImSTR	S5 Phospho, M11 Oxidation	33%, 100%	0.00, 1,000.00	126	0.9956	23.03	29.18	2	1633.64	817.826	2	0.00809	4.95	250	263
AT2G46630.1	| Symbols: | unknown protein; LOCATED IN: chloroplast; EXPRESSED IN: 22 plant structures; EXPRESSED DURING: 13 growth stages; Has 110095 Blast hits to 59224 proteins in 2216 species: Archae - 177; Bacteria - 15429; Metazoa - 38345; Fungi - 18843; Plants - 13341; Viruses - 3084; Other Eukaryotes - 20876 (source: NCBI BLink). | chr2:19145529-19146713 FORWARD LENGTH=394	GAVmEILRsPQGNK	M4 Oxidation, S9 Phospho	100%, 100%	1,000.00, 1,000.00	101.42	0.9992	19.5	31.32	2	1594.76	798.386	2	0.00441	2.77	273	286
AT2G27710.3	| Symbols: | 60S acidic ribosomal protein family | chr2:11816929-11817670 FORWARD LENGTH=115	EEKEEsDDDmGFSLFE	S6 Phospho, M10 Oxidation	35%, 100%	19.84, 1,000.00	142.3	1	64.05	28.27	2	2001.72	1001.87	2	0.00893	4.46	100	115
AT2G27710.3	| Symbols: | 60S acidic ribosomal protein family | chr2:11816929-11817670 FORWARD LENGTH=115	EEsDDDmGFSLFE	S3 Phospho, M7 Oxidation	100%, 100%	107.68, 1,000.00	152.74	0.9994	30.32	25	2	1615.54	808.775	2	0.00859	5.32	103	115
AT2G27710.3	| Symbols: | 60S acidic ribosomal protein family | chr2:11816929-11817670 FORWARD LENGTH=115	KEEKEEsDDDmGFSLFE	S7 Phospho, M11 Oxidation	100%, 100%	53.07, 1,000.00	143.54	1	53.45	29.48	2	2129.81	1065.91	2	0.00793	3.72	99	115
AT1G19870.1	| Symbols: iqd32 | IQ-domain 32 | chr1:6895400-6898539 REVERSE LENGTH=794	DATsmGTVEDPK	S4 Phospho, M5 Oxidation	99%, 100%	21.95, 1,000.00	94.78	0.9156	12.58	27.04	2	1345.52	673.767	2	0.00823	6.11	577	588
AT1G19870.1	| Symbols: iqd32 | IQ-domain 32 | chr1:6895400-6898539 REVERSE LENGTH=794	IEEDVTsEVEmASK	S7 Phospho, M11 Oxidation	50%, 100%	0.00, 1,000.00	146.67	0.9972	21.55	29.96	2	1661.68	831.848	2	0.00721	4.34	174	187
AT4G02510.1	| Symbols: TOC159, TOC86, PPI2, TOC160, ATTOC159 | translocon at the outer envelope membrane of chloroplasts 159 | chr4:1104766-1109360 FORWARD LENGTH=1503	ASSGIEAHsDEANISNNmSDR	S9 Phospho, M18 Oxidation	100%, 100%	20.20, 1,000.00	240.31	0.9983	35.93	30.98	2	2299.91	767.643	3	0.00692	3.01	657	677
AT4G02510.1	| Symbols: TOC159, TOC86, PPI2, TOC160, ATTOC159 | translocon at the outer envelope membrane of chloroplasts 159 | chr4:1104766-1109360 FORWARD LENGTH=1503	ASsGIEAHSDEANISNNmSDR	S3 Phospho, M18 Oxidation	0%, 100%	0.00, 1,000.00	246.43	0.9957	30.54	31.2	2	2299.91	767.645	3	0.0106	4.62	657	677
AT4G02510.1	| Symbols: TOC159, TOC86, PPI2, TOC160, ATTOC159 | translocon at the outer envelope membrane of chloroplasts 159 | chr4:1104766-1109360 FORWARD LENGTH=1503	AsSGIEAHSDEANISNNmSDR	S2 Phospho, M18 Oxidation	3%, 100%	14.77, 1,000.00	233.25	0.9925	38.51	30.78	2	2299.9	767.641	3	0.000137	0.0596	657	677
AT4G28080.1	| Symbols: | Tetratricopeptide repeat (TPR)-like superfamily protein | chr4:13948993-13957840 REVERSE LENGTH=1819	SALASSAcTEQINKPTPmLsPVSVK	M18 Oxidation, S20 Phospho	100%, 100%	1,000.00, 43.77	252.87	0.9958	23.74	32.4	2	2711.3	904.775	3	0.0123	4.53	1341	1365
AT4G28080.1	| Symbols: | Tetratricopeptide repeat (TPR)-like superfamily protein | chr4:13948993-13957840 REVERSE LENGTH=1819	mFVKsPLNK	M1 Oxidation, S5 Phospho	100%, 100%	1,000.00, 1,000.00	135.91	0.9941	11.91	29.4	2	1158.56	580.285	2	0.00451	3.89	1316	1324
AT4G13350.2	| Symbols: NIG | NSP (nuclear shuttle protein)-interacting GTPase | chr4:7770170-7773321 REVERSE LENGTH=602	SmsAPSLQPLQGVPSGGLQSSEVKPSGR	M2 Oxidation, S3 Phospho	100%, 100%	1,000.00, 23.99	91.02	0.9964	26.08	32.11	2	2876.39	959.803	3	0.0118	4.1	405	432
AT5G58140.1	| Symbols: PHOT2, NPL1 | phototropin 2 | chr5:23524771-23529993 FORWARD LENGTH=915	sQVQESVSNDTmVKPDSSTTPTPGR	S1 Phospho, M12 Oxidation	100%, 100%	193.33, 1,000.00	234.61	0.9993	29.72	33.08	2	2743.21	915.411	3	0.00998	3.64	284	308
AT4G25500.3	| Symbols: ATRSP35, ATRSP40, AT-SRP40, RSP35, RS40, At-RS40 | arginine/serine-rich splicing factor 35 | chr4:13025850-13027243 FORWARD LENGTH=317	DSDGGYDGAEsPmQK	S11 Phospho, M13 Oxidation	100%, 100%	153.88, 1,000.00	301.57	1	63.14	26.61	2	1651.58	826.796	2	0.00611	3.7	292	306
AT4G25500.3	| Symbols: ATRSP35, ATRSP40, AT-SRP40, RSP35, RS40, At-RS40 | arginine/serine-rich splicing factor 35 | chr4:13025850-13027243 FORWARD LENGTH=317	msPNHSPFK	M1 Oxidation, S2 Phospho	100%, 100%	1,000.00, 89.54	88.38	0.997	14.43	28.08	2	1139.45	570.732	2	0.00331	2.91	244	252
AT5G20280.1	| Symbols: ATSPS1F, SPS1F | sucrose phosphate synthase 1F | chr5:6844994-6849997 REVERSE LENGTH=1043	INsAESmELWASQQK	S3 Phospho, M7 Oxidation	100%, 100%	112.12, 1,000.00	322.8	1	79.7	31.27	2	1816.78	909.396	2	0.00645	3.55	150	164
AT3G17850.1	| Symbols: | Protein kinase superfamily protein | chr3:6109854-6116245 REVERSE LENGTH=1296	DSLAAAEsPDGmK	S8 Phospho, M12 Oxidation	100%, 100%	182.67, 1,000.00	189.68	0.9993	23.37	32.41	2	1386.54	694.279	2	0.00545	3.93	656	668
AT4G05150.1	| Symbols: | Octicosapeptide/Phox/Bem1p family protein | chr4:2660339-2662675 FORWARD LENGTH=477	DVPsPYGSTSSAPVmR	S4 Phospho, M15 Oxidation	100%, 100%	50.64, 1,000.00	157.26	0.9991	26.58	30.82	2	1745.74	873.877	2	0.00697	3.99	274	289
AT1G72160.1	| Symbols: | Sec14p-like phosphatidylinositol transfer family protein | chr1:27153823-27155609 REVERSE LENGTH=490	SmIPQNLGsFK	M2 Oxidation, S9 Phospho	100%, 100%	1,000.00, 104.58	75.93	0.9972	15.08	30.13	2	1316.59	659.302	2	0.00505	3.84	100	110
AT1G72160.1	| Symbols: | Sec14p-like phosphatidylinositol transfer family protein | chr1:27153823-27155609 REVERSE LENGTH=490	SmIPQNLGsFKEESSK	M2 Oxidation, S9 Phospho	100%, 100%	1,000.00, 110.97	263.76	1	67.94	31.57	2	1876.83	939.424	2	0.00641	3.42	100	115
AT4G15802.1	| Symbols: HSBP, AtHSBP | heat shock factor binding protein | chr4:8986864-8988339 REVERSE LENGTH=86	AEmGVEGtPPPASK	M3 Oxidation, T8 Phospho	100%, 100%	1,000.00, 129.99	357.61	1	70.4	29.8	2	1465.62	733.817	2	0.00419	2.86	61	74
AT1G67230.1	| Symbols: LINC1 | little nuclei1 | chr1:25151561-25156032 REVERSE LENGTH=1132	TDESEAmsEDVNK	M7 Oxidation, S8 Phospho	100%, 100%	1,000.00, 43.97	122.58	1	45.53	26.94	2	1549.56	775.785	2	0.00591	3.81	1086	1098
AT3G13300.2	| Symbols: VCS | Transducin/WD40 repeat-like superfamily protein | chr3:4304085-4309949 FORWARD LENGTH=1309	VFcSQVsNLSTEmAR	S7 Phospho, M13 Oxidation	100%, 100%	79.90, 1,000.00	268.96	1	95.93	30.94	2	1823.76	912.89	2	0.00647	3.54	786	800
AT3G13300.2	| Symbols: VCS | Transducin/WD40 repeat-like superfamily protein | chr3:4304085-4309949 FORWARD LENGTH=1309	VFcSQVSNLsTEmAR	S10 Phospho, M13 Oxidation	99%, 100%	24.95, 1,000.00	211.36	0.9952	26.76	30.78	2	1823.76	912.888	2	0.00359	1.97	786	800
AT1G72340.1	| Symbols: | NagB/RpiA/CoA transferase-like superfamily protein | chr1:27236898-27238482 FORWARD LENGTH=382	SSNsPPmADTTR	S4 Phospho, M7 Oxidation	100%, 100%	50.64, 1,000.00	154.43	0.9997	47.46	27.87	2	1358.52	680.269	2	0.00589	4.33	15	26
AT1G72340.1	| Symbols: | NagB/RpiA/CoA transferase-like superfamily protein | chr1:27236898-27238482 FORWARD LENGTH=382	sSNSPPmADTTR	S1 Phospho, M7 Oxidation	0%, 100%	0.00, 1,000.00	108.77	0.9945	19.16	27.64	2	1358.52	680.268	2	0.00435	3.2	15	26
AT2G46020.2	| Symbols: CHR2, ATBRM, BRM, CHA2 | transcription regulatory protein SNF2, putative | chr2:18923304-18931769 FORWARD LENGTH=2193	TGGSsSPVSPPPAmIGR	S5 Phospho, M14 Oxidation	25%, 100%	0.00, 1,000.00	94.56	0.9694	15.69	31.29	2	1692.76	847.388	2	0.00795	4.7	2117	2133
AT2G46020.2	| Symbols: CHR2, ATBRM, BRM, CHA2 | transcription regulatory protein SNF2, putative | chr2:18923304-18931769 FORWARD LENGTH=2193	TGGSSsPVSPPPAmIGR	S6 Phospho, M14 Oxidation	25%, 100%	0.00, 1,000.00	124.68	0.9895	35.32	31.33	2	1692.77	847.392	2	0.0142	8.4	2117	2133
AT2G46020.2	| Symbols: CHR2, ATBRM, BRM, CHA2 | transcription regulatory protein SNF2, putative | chr2:18923304-18931769 FORWARD LENGTH=2193	tGGSSSPVSPPPAmIGR	T1 Phospho, M14 Oxidation	25%, 100%	0.00, 1,000.00	107.53	0.9845	23.4	31.32	2	1692.77	847.391	2	0.0121	7.15	2117	2133
AT2G29210.1	| Symbols: | splicing factor PWI domain-containing protein | chr2:12558156-12562168 FORWARD LENGTH=878	HHGSQmsPVENSEGR	M6 Oxidation, S7 Phospho	100%, 99%	1,000.00, 20.20	108.56	0.9901	19.4	29.82	2	1746.68	583.234	3	0.00299	1.71	706	720
AT1G70770.1	| Symbols: | Protein of unknown function DUF2359, transmembrane | chr1:26688622-26691185 REVERSE LENGTH=610	mTAIDsDDDGVVR	M1 Oxidation, S6 Phospho	100%, 100%	1,000.00, 233.67	318.73	1	98.66	28.73	2	1488.59	745.3	2	0.00497	3.34	82	94
AT1G11360.1	| Symbols: | Adenine nucleotide alpha hydrolases-like superfamily protein | chr1:3822171-3822899 REVERSE LENGTH=242	SGDsGGENLmDSDK	S4 Phospho, M10 Oxidation	100%, 100%	42.42, 1,000.00	150.39	0.9987	36.1	26.04	2	1506.52	754.268	2	0.00287	1.91	205	218
AT2G43680.2	| Symbols: IQD14 | IQ-domain 14 | chr2:18109302-18111587 FORWARD LENGTH=668	GSLVmSNsSSHR	M5 Oxidation, S8 Phospho	100%, 25%	1,000.00, 0.00	165.28	0.9987	34.24	29.12	2	1356.56	679.285	2	0.00583	4.3	614	625
AT3G20250.1	| Symbols: APUM5, PUM5 | pumilio 5 | chr3:7059098-7062660 REVERSE LENGTH=961	SEsAPPSmEGSFAALR	S3 Phospho, M8 Oxidation	99%, 100%	21.44, 1,000.00	125.33	0.9959	25.58	31	2	1731.72	866.87	2	0.00697	4.02	60	75
AT4G22670.1	| Symbols: AtHip1, HIP1, TPR11 | HSP70-interacting protein 1 | chr4:11918236-11920671 FORWARD LENGTH=441	SFVVEEsDDDmDETEEVKPK	S7 Phospho, M11 Oxidation	100%, 100%	52.57, 1,000.00	160.59	0.9972	30.94	31.57	2	2422.97	808.664	3	0.00828	3.41	57	76
AT4G31880.1	| Symbols: | LOCATED IN: cytosol, chloroplast; EXPRESSED IN: 24 plant structures; EXPRESSED DURING: 14 growth stages; BEST Arabidopsis thaliana protein match is: Tudor/PWWP/MBT superfamily protein (TAIR:AT1G15940.1); Has 137162 Blast hits to 70781 proteins in 2973 species: Archae - 289; Bacteria - 24182; Metazoa - 56725; Fungi - 20130; Plants - 6559; Viruses - 758; Other Eukaryotes - 28519 (sourc…	TSGDETANVsSPSmAEELPEQSVPK	S10 Phospho, M14 Oxidation	33%, 100%	0.00, 1,000.00	217.13	0.9987	50.31	32.74	2	2685.14	896.055	3	0.00782	2.91	426	450
AT4G31880.1	| Symbols: | LOCATED IN: cytosol, chloroplast; EXPRESSED IN: 24 plant structures; EXPRESSED DURING: 14 growth stages; BEST Arabidopsis thaliana protein match is: Tudor/PWWP/MBT superfamily protein (TAIR:AT1G15940.1); Has 137162 Blast hits to 70781 proteins in 2973 species: Archae - 289; Bacteria - 24182; Metazoa - 56725; Fungi - 20130; Plants - 6559; Viruses - 758; Other Eukaryotes - 28519 (sourc…	TSGDETANVSsPSmAEELPEQSVPK	S11 Phospho, M14 Oxidation	49%, 100%	0.00, 1,000.00	164.82	0.9951	34.35	32.91	2	2685.15	1343.58	2	0.016	5.97	426	450
AT4G31880.1	| Symbols: | LOCATED IN: cytosol, chloroplast; EXPRESSED IN: 24 plant structures; EXPRESSED DURING: 14 growth stages; BEST Arabidopsis thaliana protein match is: Tudor/PWWP/MBT superfamily protein (TAIR:AT1G15940.1); Has 137162 Blast hits to 70781 proteins in 2973 species: Archae - 289; Bacteria - 24182; Metazoa - 56725; Fungi - 20130; Plants - 6559; Viruses - 758; Other Eukaryotes - 28519 (sourc…	TSGDEtANVSSPSmAEELPEQSVPK	T6 Phospho, M14 Oxidation	0%, 100%	0.00, 1,000.00	149.5	0.9917	23.56	32.68	2	2685.14	896.055	3	0.00629	2.34	426	450
AT4G31880.1	| Symbols: | LOCATED IN: cytosol, chloroplast; EXPRESSED IN: 24 plant structures; EXPRESSED DURING: 14 growth stages; BEST Arabidopsis thaliana protein match is: Tudor/PWWP/MBT superfamily protein (TAIR:AT1G15940.1); Has 137162 Blast hits to 70781 proteins in 2973 species: Archae - 289; Bacteria - 24182; Metazoa - 56725; Fungi - 20130; Plants - 6559; Viruses - 758; Other Eukaryotes - 28519 (sourc…	TSGDETANVSSPsmAEELPEQSVPK	S13 Phospho, M14 Oxidation	32%, 100%	0.00, 1,000.00	88.31	0.9716	16.31	32.78	2	2685.15	1343.58	2	0.00863	3.21	426	450
AT4G01290.2	| Symbols: | unknown protein; FUNCTIONS IN: molecular_function unknown; INVOLVED IN: biological_process unknown; LOCATED IN: cellular_component unknown; EXPRESSED IN: 24 plant structures; EXPRESSED DURING: 15 growth stages; Has 1797 Blast hits to 1352 proteins in 216 species: Archae - 0; Bacteria - 202; Metazoa - 850; Fungi - 267; Plants - 109; Viruses - 0; Other Eukaryotes - 369 (source: NCBI BL…	IGSsEmLIEGEDVR	S4 Phospho, M6 Oxidation	100%, 100%	24.95, 1,000.00	159.02	0.9822	30.64	30.4	2	1629.7	815.855	2	-0.000447	-0.274	357	370
AT3G45780.2	| Symbols: PHOT1, NPH1, JK224, RPT1 | phototropin 1 | chr3:16818557-16823960 FORWARD LENGTH=996	SsGEmSDGDVPGGR	S2 Phospho, M5 Oxidation	50%, 100%	0.00, 1,000.00	185.64	0.9987	74.49	26.94	2	1445.52	723.766	2	0.00459	3.18	165	178
AT3G45780.2	| Symbols: PHOT1, NPH1, JK224, RPT1 | phototropin 1 | chr3:16818557-16823960 FORWARD LENGTH=996	ALsESTNLHPFmTK	S3 Phospho, M12 Oxidation	100%, 100%	24.95, 1,000.00	174.97	0.9989	43.15	31.22	2	1670.74	836.379	2	0.00495	2.96	348	361
AT5G61210.1	| Symbols: SNAP33, ATSNAP33, SNP33, ATSNAP33B | soluble N-ethylmaleimide-sensitive factor adaptor protein 33 | chr5:24624027-24625366 FORWARD LENGTH=300	TTsEPSLADmTNPFGGER	S3 Phospho, M10 Oxidation	99%, 100%	23.20, 1,000.00	321.55	0.9947	119.9	30.94	2	2004.82	1003.42	2	0.00943	4.7	45	62
AT5G61210.1	| Symbols: SNAP33, ATSNAP33, SNP33, ATSNAP33B | soluble N-ethylmaleimide-sensitive factor adaptor protein 33 | chr5:24624027-24625366 FORWARD LENGTH=300	TTSEPsLADmTNPFGGER	S6 Phospho, M10 Oxidation	25%, 100%	0.00, 1,000.00	133.63	0.9979	38.24	30.95	2	2004.82	669.282	3	0.0103	5.15	45	62
AT1G16520.1	| Symbols: | unknown protein; FUNCTIONS IN: molecular_function unknown; INVOLVED IN: biological_process unknown; LOCATED IN: plasma membrane; EXPRESSED IN: 22 plant structures; EXPRESSED DURING: 13 growth stages; BEST Arabidopsis thaliana protein m	FSmTSYIsPR	M3 Oxidation, S8 Phospho	100%, 100%	1,000.00, 48.15	177.3	1	41.99	28.72	2	1283.53	642.772	2	0.00461	3.59	0	0
AT3G23920.1	| Symbols: BAM1, BMY7, TR-BAMY | beta-amylase 1 | chr3:8641722-8644199 FORWARD LENGTH=575	SGEmTDSSLLSIsPPSAR	M4 Oxidation, S13 Phospho	100%, 100%	1,000.00, 27.96	163.16	0.9987	29.89	31.49	2	1929.85	965.931	2	0.00741	3.84	19	36
AT1G35580.2	| Symbols: CINV1 | cytosolic invertase 1 | chr1:13122460-13124808 REVERSE LENGTH=551	smSELSTGYSR	S1 Phospho, M2 Oxidation	100%, 100%	54.16, 1,000.00	177.37	0.9986	35.53	28.04	2	1312.5	657.26	2	0.00423	3.22	44	54
AT1G35580.2	| Symbols: CINV1 | cytosolic invertase 1 | chr1:13122460-13124808 REVERSE LENGTH=551	SmSELsTGYSR	M2 Oxidation, S6 Phospho	100%, 100%	1,000.00, 27.96	176.68	0.999	47.66	28.16	2	1312.51	657.261	2	0.00667	5.08	44	54
AT1G35580.2	| Symbols: CINV1 | cytosolic invertase 1 | chr1:13122460-13124808 REVERSE LENGTH=551	SmSELStGYSR	M2 Oxidation, T7 Phospho	100%, 0%	1,000.00, 0.00	144.92	0.9896	21.29	32.31	2	1312.51	657.261	2	0.00741	5.64	44	54
AT3G49590.1	| Symbols: | Autophagy-related protein 13 | chr3:18377892-18380104 FORWARD LENGTH=603	sGESPSGLmNQYPTQK	S1 Phospho, M9 Oxidation	50%, 100%	0.00, 1,000.00	208.29	0.9987	75.4	30.59	2	1818.76	910.386	2	0.00767	4.22	422	437
AT3G49590.1	| Symbols: | Autophagy-related protein 13 | chr3:18377892-18380104 FORWARD LENGTH=603	IITDYVGsPATDPmR	S8 Phospho, M14 Oxidation	100%, 100%	67.98, 1,000.00	301.45	0.9995	40.9	31.19	2	1730.76	866.389	2	0.00371	2.14	241	255
AT3G49590.1	| Symbols: | Autophagy-related protein 13 | chr3:18377892-18380104 FORWARD LENGTH=603	SGEsPSGLmNQYPTQK	S4 Phospho, M9 Oxidation	99%, 100%	20.02, 1,000.00	251.08	0.9983	85.79	30.52	2	1818.76	910.385	2	0.00583	3.21	422	437
AT1G16860.1	| Symbols: | Ubiquitin-specific protease family C19-related protein | chr1:5768280-5770183 FORWARD LENGTH=474	SGsFAGTAQSGPGAPmATGR	S3 Phospho, M16 Oxidation	99%, 100%	20.77, 1,000.00	135.13	0.9984	39.53	31.31	2	1902.8	952.407	2	0.00649	3.41	74	93
AT1G16860.1	| Symbols: | Ubiquitin-specific protease family C19-related protein | chr1:5768280-5770183 FORWARD LENGTH=474	KVsGPLDSSGLmK	S3 Phospho, M12 Oxidation	100%, 100%	126.52, 1,000.00	184.96	0.999	24.31	30.69	2	1413.66	707.839	2	0.00565	4	167	179
AT3G60240.2	| Symbols: EIF4G, CUM2 | eukaryotic translation initiation factor 4G | chr3:22261842-22268295 FORWARD LENGTH=1723	TTsAPPNmDDQK	S3 Phospho, M8 Oxidation	99%, 100%	23.20, 1,000.00	47.24	0.9816	13.29	28.57	2	1399.54	700.776	2	0.00387	2.77	174	185
AT3G60240.2	| Symbols: EIF4G, CUM2 | eukaryotic translation initiation factor 4G | chr3:22261842-22268295 FORWARD LENGTH=1723	TTsAPPNmDDQKR	S3 Phospho, M8 Oxidation	33%, 100%	0.00, 1,000.00	14.05	0.9564	10.6	30.24	2	1555.64	778.827	2	0.00503	3.23	174	186
AT1G18210.2	| Symbols: | Calcium-binding EF-hand family protein | chr1:6268273-6268785 REVERSE LENGTH=170	AmGTsYTETELNR	M2 Oxidation, S5 Phospho	100%, 99%	1,000.00, 23.98	237.22	0.9986	52.6	29.69	2	1567.63	784.823	2	0.00783	4.99	50	62
AT1G68790.1	| Symbols: LINC3 | little nuclei3 | chr1:25834932-25839157 REVERSE LENGTH=1085	IQEGPEGsLQSEmK	S8 Phospho, M13 Oxidation	100%, 100%	56.71, 1,000.00	265.81	1	54.38	30.49	2	1627.69	814.85	2	0.00513	3.15	836	849
AT5G03280.1	| Symbols: EIN2, PIR2, CKR1, ERA3, ORE3, ORE2, ATEIN2 | NRAMP metal ion transporter family protein | chr5:788589-793066 FORWARD LENGTH=1294	LSNKPVGmNQDGPGsR	M8 Oxidation, S15 Phospho	100%, 100%	1,000.00, 44.37	55.81	0.9994	20.25	31.43	2	1751.77	584.931	3	0.0062	3.54	1269	1284
AT5G47690.3	| Symbols: | binding | chr5:19317899-19327014 FORWARD LENGTH=1607	mLESIsPR	M1 Oxidation, S6 Phospho	100%, 100%	1,000.00, 41.11	151.84	0.99	31.83	28.91	2	1027.44	514.73	2	0.00361	3.51	1294	1301
AT4G30160.1	| Symbols: VLN4, ATVLN4 | villin 4 | chr4:14754528-14759511 FORWARD LENGTH=974	SmsFSPDR	M2 Oxidation, S3 Phospho	100%, 100%	1,000.00, 46.21	100.97	0.9606	10.8	26.21	2	1021.36	511.689	2	0.00553	5.41	773	780
AT4G30160.1	| Symbols: VLN4, ATVLN4 | villin 4 | chr4:14754528-14759511 FORWARD LENGTH=974	SmSFsPDR	M2 Oxidation, S5 Phospho	100%, 100%	1,000.00, 25.23	107.67	0.99	22.26	26.21	2	1021.36	511.689	2	0.00583	5.71	773	780
AT5G10470.1	| Symbols: KCA1, KAC1 | kinesin like protein for actin based chloroplast movement 1 | chr5:3290121-3297248 REVERSE LENGTH=1273	SmAVSTQVLsPSLR	M2 Oxidation, S10 Phospho	100%, 100%	1,000.00, 27.96	158.83	0.9871	16.33	31.03	2	1570.75	786.382	2	0.00693	4.41	659	672
AT2G38770.1	| Symbols: EMB2765 | P-loop containing nucleoside triphosphate hydrolases superfamily protein | chr2:16203185-16210253 REVERSE LENGTH=1509	NmQQLNQsPDIDGELSK	M2 Oxidation, S8 Phospho	100%, 100%	1,000.00, 163.56	203.16	1	48.5	31.65	2	2011.86	671.627	3	0.00387	1.92	1470	1486
AT1G08420.2	| Symbols: BSL2 | BRI1 suppressor 1 (BSU1)-like 2 | chr1:2649959-2656564 FORWARD LENGTH=1013	QmsINSVPK	M2 Oxidation, S3 Phospho	100%, 100%	1,000.00, 74.63	157.39	1	41.61	29	2	1098.48	550.249	2	0.00445	4.05	651	659
AT5G42950.1	| Symbols: | GYF domain-containing protein | chr5:17224436-17231044 FORWARD LENGTH=1714	mTTSSHPPPsPVPTTQK	M1 Oxidation, S10 Phospho	100%, 100%	1,000.00, 47.18	102.58	0.9788	12.68	31.98	2	1887.85	944.931	2	0.00325	1.72	1440	1456
AT5G03730.1	| Symbols: CTR1, SIS1, AtCTR1 | Protein kinase superfamily protein | chr5:974958-979660 REVERSE LENGTH=821	IQmAADSAGGSSsGK	M3 Oxidation, S13 Phospho	100%, 25%	1,000.00, 0.00	177.45	0.9944	30.68	28.75	2	1461.58	731.799	2	0.00303	2.07	145	159
AT5G03730.1	| Symbols: CTR1, SIS1, AtCTR1 | Protein kinase superfamily protein | chr5:974958-979660 REVERSE LENGTH=821	IQmAADSAGGSsSGK	M3 Oxidation, S12 Phospho	100%, 33%	1,000.00, 0.00	234.92	0.9977	63.64	28.6	2	1461.58	731.799	2	0.00253	1.73	145	159
AT5G03730.1	| Symbols: CTR1, SIS1, AtCTR1 | Protein kinase superfamily protein | chr5:974958-979660 REVERSE LENGTH=821	IQmAADSAGGsSSGK	M3 Oxidation, S11 Phospho	100%, 100%	1,000.00, 26.20	193.67	0.9988	36.22	28.79	2	1461.58	731.8	2	0.00393	2.69	145	159
AT5G57610.1	| Symbols: | Protein kinase superfamily protein with octicosapeptide/Phox/Bem1p domain | chr5:23325307-23329099 FORWARD LENGTH=1054	YSTGmENQGVLVGsPQR	M5 Oxidation, S14 Phospho	100%, 100%	1,000.00, 91.73	108.61	0.9963	12.63	31.63	2	1917.84	959.926	2	0.00819	4.27	544	560
AT5G57610.1	| Symbols: | Protein kinase superfamily protein with octicosapeptide/Phox/Bem1p domain | chr5:23325307-23329099 FORWARD LENGTH=1054	VGsGQmLAQR	S3 Phospho, M6 Oxidation	100%, 100%	1,000.00, 1,000.00	145.63	1	60.89	29.32	2	1141.5	571.757	2	0.00399	3.49	218	227
AT2G17290.1	| Symbols: CPK6, ATCDPK3, ATCPK6 | Calcium-dependent protein kinase family protein | chr2:7517005-7519239 FORWARD LENGTH=544	NSLNIsmR	S6 Phospho, M7 Oxidation	100%, 100%	110.19, 1,000.00	131.3	0.99	25.79	28.25	2	1029.43	515.725	2	0.00307	2.98	535	542
AT4G15530.2	| Symbols: PPDK | pyruvate orthophosphate dikinase | chr4:8864828-8869183 REVERSE LENGTH=875	GGmtSHAAVVAR	M3 Oxidation, T4 Phospho	100%, 100%	1,000.00, 26.20	198.47	0.9989	30.11	29.19	2	1251.55	626.781	2	0.00451	3.6	452	463
AT1G77760.1	| Symbols: NIA1, GNR1, NR1 | nitrate reductase 1 | chr1:29236005-29239367 REVERSE LENGTH=917	SVsSPFmNTASK	S3 Phospho, M7 Oxidation	100%, 100%	55.92, 1,000.00	213.7	0.9993	65.63	29.46	2	1350.56	676.287	2	0.00627	4.64	535	546
AT3G23900.1	| Symbols: | RNA recognition motif (RRM)-containing protein | chr3:8631941-8635852 REVERSE LENGTH=987	SKsLDEDYDmK	S3 Phospho, M10 Oxidation	100%, 100%	53.65, 1,000.00	174.24	0.9985	21.91	28.44	2	1425.54	713.779	2	0.00681	4.78	745	755
AT1G78880.1	| Symbols: | Ubiquitin-specific protease family C19-related protein | chr1:29653068-29654819 REVERSE LENGTH=468	ISGPLDYSGsmK	S10 Phospho, M11 Oxidation	33%, 100%	0.00, 1,000.00	111.64	0.9981	40.83	29.52	2	1349.57	675.79	2	0.00761	5.64	162	173
AT2G32080.2	| Symbols: PUR ALPHA-1 | purin-rich alpha 1 | chr2:13642716-13644036 REVERSE LENGTH=295	TIDsPGQEETGmTGVSK	S4 Phospho, M12 Oxidation	100%, 100%	42.24, 1,000.00	268.48	0.9995	85.54	31.06	2	1831.76	916.888	2	0.00663	3.62	203	219
AT3G25070.1	| Symbols: RIN4 | RPM1 interacting protein 4 | chr3:9132458-9133747 FORWARD LENGTH=211	ImNPNDPEYNSDSQsQAPPHPPSSR	M2 Oxidation, S15 Phospho	100%, 25%	1,000.00, 0.00	110.54	0.9913	19.49	32.58	2	2860.19	954.404	3	0.0137	4.79	37	61
AT1G67580.2	| Symbols: | Protein kinase superfamily protein | chr1:25327727-25330965 REVERSE LENGTH=752	mVKsPDPLEEQR	M1 Oxidation, S4 Phospho	100%, 100%	1,000.00, 1,000.00	195.98	0.9995	24.6	30.47	2	1523.68	762.845	2	0.00643	4.22	725	736
AT2G17700.1	| Symbols: | ACT-like protein tyrosine kinase family protein | chr2:7685778-7689278 REVERSE LENGTH=546	VQIESGVmtAETGTYR	M8 Oxidation, T9 Phospho	100%, 100%	1,000.00, 24.95	196.66	0.9983	46.26	31.69	2	1836.81	919.411	2	0.00995	5.42	431	446
AT5G36880.2	| Symbols: ACS | acetyl-CoA synthetase | chr5:14534961-14540296 REVERSE LENGTH=743	HVEsmSQLPSGAGK	S4 Phospho, M5 Oxidation	50%, 100%	0.00, 1,000.00	128.51	0.994	20.78	30.49	2	1522.66	762.336	2	0.00817	5.36	58	71
AT5G36880.2	| Symbols: ACS | acetyl-CoA synthetase | chr5:14534961-14540296 REVERSE LENGTH=743	HVESmsQLPSGAGK	M5 Oxidation, S6 Phospho	100%, 50%	1,000.00, 0.00	180.86	0.9973	41.77	30.52	2	1522.66	762.336	2	0.00917	6.02	58	71
AT2G35880.1	| Symbols: | TPX2 (targeting protein for Xklp2) protein family | chr2:15063204-15065259 REVERSE LENGTH=432	FmSQSSsFPTK	M2 Oxidation, S7 Phospho	100%, 97%	1,000.00, 18.44	140.19	0.999	40.14	28.46	2	1341.54	671.776	2	0.00589	4.39	92	102
AT3G25840.1	| Symbols: | Protein kinase superfamily protein | chr3:9452993-9457446 REVERSE LENGTH=935	APLIAGGPPTmSGISDsEK	M11 Oxidation, S17 Phospho	100%, 1%	1,000.00, 0.00	115.18	0.995	24.2	32.06	2	1922.88	962.446	2	0.00819	4.26	526	544
AT5G64220.2	| Symbols: | Calmodulin-binding transcription activator protein with CG-1 and Ankyrin domains | chr5:25686434-25691903 FORWARD LENGTH=1050	VKsmAQYPEAR	S3 Phospho, M4 Oxidation	100%, 100%	70.16, 1,000.00	129.34	0.9987	23.3	30.49	2	1374.6	688.308	2	0.00201	1.46	982	992
AT5G64220.2	| Symbols: | Calmodulin-binding transcription activator protein with CG-1 and Ankyrin domains | chr5:25686434-25691903 FORWARD LENGTH=1050	smAQYPEAR	S1 Phospho, M2 Oxidation	100%, 100%	86.37, 1,000.00	129.52	1	38.64	26.6	2	1147.44	574.728	2	0.00487	4.24	984	992
AT3G17900.1	| Symbols: | unknown protein; FUNCTIONS IN: molecular_function unknown; INVOLVED IN: biological_process unknown; LOCATED IN: cellular_component unknown; EXPRESSED IN: 23 plant structures; EXPRESSED DURING: 13 growth stages; Has 45 Blast hits to 44 proteins in 14 species: Archae - 0; Bacteria - 0; Metazoa - 2; Fungi - 2; Plants - 39; Viruses - 0; Other Eukaryotes - 2 (source: NCBI BLink). | chr3:6…	KGsGLSGDQYAVmVScR	S3 Phospho, M13 Oxidation	100%, 100%	63.60, 1,000.00	136.72	0.9601	14.43	31.74	2	1909.81	955.913	2	0.00415	2.17	604	620
AT4G38470.1	| Symbols: | ACT-like protein tyrosine kinase family protein | chr4:17999432-18003551 FORWARD LENGTH=575	AQTGVmtAETGTYR	M6 Oxidation, T7 Phospho	100%, 100%	1,000.00, 63.60	254.8	1	52.52	30.68	2	1580.66	791.338	2	0.00619	3.92	437	450
AT2G37970.1	| Symbols: SOUL-1 | SOUL heme-binding family protein | chr2:15891027-15891704 FORWARD LENGTH=225	IEmTsPVVTK	M3 Oxidation, S5 Phospho	100%, 100%	1,000.00, 27.96	206.61	0.9997	58.73	30.03	2	1199.56	600.785	2	0.00469	3.91	111	120
AT2G37970.1	| Symbols: SOUL-1 | SOUL heme-binding family protein | chr2:15891027-15891704 FORWARD LENGTH=225	ESEKIEmTsPVVTK	M7 Oxidation, S9 Phospho	100%, 50%	1,000.00, 0.00	265.48	0.9984	42.8	31.47	2	1672.77	837.392	2	0.00663	3.96	107	120
AT2G37970.1	| Symbols: SOUL-1 | SOUL heme-binding family protein | chr2:15891027-15891704 FORWARD LENGTH=225	EsEKIEmTSPVVTK	S2 Phospho, M7 Oxidation	0%, 100%	0.00, 1,000.00	106.53	0.9964	24.19	31.47	2	1672.77	558.597	3	0.00731	4.37	107	120
AT5G58950.1	| Symbols: | Protein kinase superfamily protein | chr5:23801136-23803025 REVERSE LENGTH=525	SVsPSPQmAVPDVFK	S3 Phospho, M8 Oxidation	100%, 100%	23.19, 1,000.00	206.49	0.9987	67.6	31.34	2	1683.76	842.889	2	0.00591	3.51	99	113
AT1G37130.1	| Symbols: NIA2, B29, NIA2-1, CHL3, NR, NR2, ATNR2 | nitrate reductase 2 | chr1:14158617-14161652 FORWARD LENGTH=917	SVsTPFmNTTAK	S3 Phospho, M7 Oxidation	100%, 100%	49.90, 1,000.00	165.7	0.9979	46.18	29.51	2	1378.59	690.3	2	0.00211	1.53	532	543
AT5G01400.1	| Symbols: ESP4 | HEAT repeat-containing protein | chr5:162803-171072 REVERSE LENGTH=1467	SEmSQSQNsPIDTGR	M3 Oxidation, S9 Phospho	100%, 100%	1,000.00, 93.05	282.67	0.9817	38.41	30.6	2	1731.7	866.858	2	0.0251	14.5	0	0
AT1G14380.1	| Symbols: IQD28 | IQ-domain 28 | chr1:4918279-4920761 REVERSE LENGTH=664	LSTTTmsPR	M6 Oxidation, S7 Phospho	100%, 100%	1,000.00, 68.84	184.55	0.999	37.64	28.48	2	1088.46	545.238	2	0.00475	4.36	620	628
AT1G56080.1	| Symbols: | unknown protein; FUNCTIONS IN: molecular_function unknown; INVOLVED IN: biological_process unknown; LOCATED IN: plasma membrane; EXPRESSED IN: 12 plant structures; EXPRESSED DURING: 6 growth stages; BEST Arabidopsis thaliana protein ma	mWSSTSQQSSVANsPPR	M1 Oxidation, S14 Phospho	100%, 100%	1,000.00, 21.95	78.24	0.9626	9.3	31.34	2	1944.81	649.277	3	0.00562	2.89	0	0
AT5G14540.1	| Symbols: | Protein of unknown function (DUF1421) | chr5:4687333-4689624 REVERSE LENGTH=547	SYGsmDSLEPSK	S4 Phospho, M5 Oxidation	100%, 100%	65.61, 1,000.00	152.81	0.9989	30.24	28.09	2	1395.53	698.774	2	0.00643	4.61	101	112
AT5G14540.1	| Symbols: | Protein of unknown function (DUF1421) | chr5:4687333-4689624 REVERSE LENGTH=547	sYGSmDSLEPSK	S1 Phospho, M5 Oxidation	25%, 100%	0.00, 1,000.00	133.83	0.9944	29.44	27.93	2	1395.53	698.772	2	0.00277	1.99	101	112
AT1G73660.1	| Symbols: | protein tyrosine kinase family protein | chr1:27692247-27696718 REVERSE LENGTH=1030	StAGTAEWmAPEVLR	T2 Phospho, M9 Oxidation	49%, 100%	0.00, 1,000.00	87.91	0.9914	18.84	30.75	2	1713.75	857.883	2	0.00835	4.87	905	919
AT1G27090.1	| Symbols: | glycine-rich protein | chr1:9404041-9406098 REVERSE LENGTH=420	AATASSEAsEGPVmGLINK	S9 Phospho, M14 Oxidation	25%, 100%	0.00, 1,000.00	144.3	0.998	33.98	31.81	2	1927.87	643.629	3	0.00655	3.39	0	0
AT1G27090.1	| Symbols: | glycine-rich protein | chr1:9404041-9406098 REVERSE LENGTH=420	AATASsEASEGPVmGLINK	S6 Phospho, M14 Oxidation	100%, 100%	27.96, 1,000.00	351.03	0.995	108.2	31.8	2	1927.87	964.942	2	0.00991	5.14	0	0
AT1G27090.1	| Symbols: | glycine-rich protein | chr1:9404041-9406098 REVERSE LENGTH=420	AAtASSEASEGPVmGLINK	T3 Phospho, M14 Oxidation	33%, 100%	0.00, 1,000.00	135.17	0.9985	38.87	31.8	2	1927.87	964.942	2	0.00959	4.97	0	0
AT2G32700.7	| Symbols: LUH | LEUNIG_homolog | chr2:13867235-13871844 FORWARD LENGTH=806	DGQQNANDGSIGsPmQSSSSK	S13 Phospho, M15 Oxidation	100%, 100%	23.20, 1,000.00	166.06	0.9989	34.86	31.04	2	2189.86	1095.94	2	0.00763	3.48	346	366
AT5G18230.2	| Symbols: | transcription regulator NOT2/NOT3/NOT5 family protein | chr5:6021610-6027031 REVERSE LENGTH=845	NImGVESNVQPLTsPLSK	M3 Oxidation, S14 Phospho	100%, 100%	1,000.00, 24.95	157.93	0.9907	18.01	31.56	2	2008.96	1005.49	2	0.00863	4.3	420	437
AT4G12770.1	| Symbols: | Chaperone DnaJ-domain superfamily protein | chr4:7506736-7511408 REVERSE LENGTH=891	ASVNSPtASQmDELDDFSIGR	T7 Phospho, M11 Oxidation	33%, 100%	0.00, 1,000.00	235.2	0.9929	107.6	31.87	2	2334.97	1168.49	2	0.00393	1.68	408	428
AT4G12770.1	| Symbols: | Chaperone DnaJ-domain superfamily protein | chr4:7506736-7511408 REVERSE LENGTH=891	ASVNSPTAsQmDELDDFSIGR	S9 Phospho, M11 Oxidation	25%, 100%	0.00, 1,000.00	99.7	0.9983	40.36	31.94	2	2334.98	779.333	3	0.0101	4.32	408	428
AT5G52310.1	| Symbols: COR78, LTI78, RD29A, LTI140 | low-temperature-responsive protein 78 (LTI78) / desiccation-responsive protein 29A (RD29A) | chr5:21240929-21243326 FORWARD LENGTH=710	NSPmGFGsESGAELEK	M4 Oxidation, S8 Phospho	100%, 99%	1,000.00, 20.98	123.29	0.999	32.06	29.77	2	1734.69	868.351	2	0.00741	4.27	355	370
AT5G56850.2	| Symbols: | unknown protein; EXPRESSED IN: 21 plant structures; EXPRESSED DURING: 13 growth stages; Has 35333 Blast hits to 34131 proteins in 2444 species: Archae - 798; Bacteria - 22429; Metazoa - 974; Fungi - 991; Plants - 531; Viruses - 0; Other Eukaryotes - 9610 (source: NCBI BLink). | chr5:22985432-22987011 REVERSE LENGTH=413	SmsDSNLNNVR	M2 Oxidation, S3 Phospho	100%, 100%	1,000.00, 57.17	218.57	0.9985	59.97	27.74	2	1331.52	666.769	2	0.00665	4.99	158	168
AT1G44910.1	| Symbols: ATPRP40A, PRP40A | pre-mRNA-processing protein 40A | chr1:16975930-16982818 FORWARD LENGTH=958	ANLsPAGDKANVEEPmVYATK	S4 Phospho, M16 Oxidation	100%, 100%	144.48, 1,000.00	147.75	0.9924	12.08	32.66	2	2300.05	767.69	3	0.00834	3.62	384	404
AT1G36310.1	| Symbols: | S-adenosyl-L-methionine-dependent methyltransferases superfamily protein | chr1:13669644-13670934 FORWARD LENGTH=404	YVEEWVGPGSPmNsPR	M12 Oxidation, S14 Phospho	100%, 100%	1,000.00, 21.95	266.89	0.9974	38.24	31.76	2	1899.79	950.901	2	0.00207	1.09	225	240
AT2G28290.1	| Symbols: SYD, CHR3 | P-loop containing nucleoside triphosphate hydrolases superfamily protein | chr2:12056771-12072950 FORWARD LENGTH=3574	THLADVVPSSSPTtmEK	T14 Phospho, M15 Oxidation	20%, 100%	0.00, 1,000.00	154.73	0.9518	13.81	31.86	2	1894.84	948.43	2	0.00607	3.2	3117	3133
AT4G28990.1	| Symbols: | RNA-binding protein-related | chr4:14291205-14293018 FORWARD LENGTH=347	LLPPPmNHsPR	M6 Oxidation, S9 Phospho	100%, 100%	1,000.00, 1,000.00	107.28	0.9987	19.76	30.43	2	1353.63	677.823	2	0.00533	3.94	195	205
AT1G09730.1	| Symbols: | Cysteine proteinases superfamily protein | chr1:3148017-3154236 REVERSE LENGTH=963	LsSPTGEAEEmEK	S2 Phospho, M11 Oxidation	100%, 100%	27.96, 1,000.00	200.1	0.9944	30.26	29.05	2	1502.59	752.301	2	0.00287	1.91	951	963
AT1G09730.1	| Symbols: | Cysteine proteinases superfamily protein | chr1:3148017-3154236 REVERSE LENGTH=963	LSsPTGEAEEmEK	S3 Phospho, M11 Oxidation	100%, 100%	26.20, 1,000.00	215.1	0.9983	59.35	29.16	2	1502.59	752.304	2	0.00803	5.34	951	963
AT4G28610.1	| Symbols: PHR1, AtPHR1 | phosphate starvation response 1 | chr4:14133164-14134951 REVERSE LENGTH=409	TSsIPSTQKPSPVEDSFmR	S3 Phospho, M18 Oxidation	100%, 100%	26.20, 1,000.00	99.98	0.9214	11.5	32.38	2	2188.98	730.667	3	0.00819	3.74	17	35
AT1G79090.1	| Symbols: | FUNCTIONS IN: molecular_function unknown; INVOLVED IN: biological_process unknown; LOCATED IN: cellular_component unknown; EXPRESSED IN: 25 plant structures; EXPRESSED DURING: 15 growth stages; CONTAINS InterPro DOMAIN/s: Topoisomerase II-associated protein PAT1 (InterPro:IPR019167); BEST Arabidopsis thaliana protein match is: Topoisomerase II-associated protein PAT1 (TAIR:AT3G22270.…	SSsSGNYDGmLGFGDLR	S3 Phospho, M10 Oxidation	25%, 100%	0.00, 1,000.00	245.32	0.9961	63.98	29.73	2	1857.73	929.87	2	0.00175	0.943	340	356
AT1G79090.1	| Symbols: | FUNCTIONS IN: molecular_function unknown; INVOLVED IN: biological_process unknown; LOCATED IN: cellular_component unknown; EXPRESSED IN: 25 plant structures; EXPRESSED DURING: 15 growth stages; CONTAINS InterPro DOMAIN/s: Topoisomerase II-associated protein PAT1 (InterPro:IPR019167); BEST Arabidopsis thaliana protein match is: Topoisomerase II-associated protein PAT1 (TAIR:AT3G22270.…	SSSsGNYDGmLGFGDLR	S4 Phospho, M10 Oxidation	25%, 100%	0.00, 1,000.00	194.85	0.9819	79.78	30	2	1857.74	929.879	2	0.0193	10.4	340	356
AT5G62440.1	| Symbols: | Protein of unknown function (DUF3223) | chr5:25072620-25073917 REVERSE LENGTH=202	VDmEVETAtPK	M3 Oxidation, T9 Phospho	100%, 50%	1,000.00, 0.00	180.23	0.9917	21.61	33.49	2	1314.55	658.28	2	0.00401	3.05	21	31
AT5G06140.1	| Symbols: SNX1, ATSNX1 | sorting nexin 1 | chr5:1856212-1858752 REVERSE LENGTH=402	NISGSmQsPR	M6 Oxidation, S8 Phospho	100%, 99%	1,000.00, 21.44	134.8	0.9829	15.98	27.87	2	1171.47	586.743	2	0.00175	1.5	9	18
AT3G54760.1	| Symbols: | dentin sialophosphoprotein-related | chr3:20269659-20272037 REVERSE LENGTH=792	AASQmAGsPSVLK	M5 Oxidation, S8 Phospho	100%, 100%	1,000.00, 24.95	148.83	0.9986	21.51	30.04	2	1341.6	671.81	2	0.00487	3.63	528	540
AT4G14920.1	| Symbols: | Acyl-CoA N-acyltransferase with RING/FYVE/PHD-type zinc finger protein | chr4:8531157-8535842 REVERSE LENGTH=1138	mITsDSESSDR	M1 Oxidation, S4 Phospho	100%, 33%	1,000.00, 0.00	51.26	0.9568	12.27	25.94	2	1322.48	662.245	2	0.00571	4.32	54	64
AT4G14920.1	| Symbols: | Acyl-CoA N-acyltransferase with RING/FYVE/PHD-type zinc finger protein | chr4:8531157-8535842 REVERSE LENGTH=1138	mITSDsESSDR	M1 Oxidation, S6 Phospho	100%, 1%	1,000.00, 0.00	80.98	0.9688	15.84	25.95	2	1322.48	662.246	2	0.00689	5.21	54	64
AT1G72390.1	| Symbols: | CONTAINS InterPro DOMAIN/s: Spt20 family (InterPro:IPR021950); Has 8778 Blast hits to 7244 proteins in 477 species: Archae - 6; Bacteria - 326; Metazoa - 4198; Fungi - 1506; Plants - 923; Viruses - 22; Other Eukaryotes - 1797 (source: NCBI BLink). | chr1:27245455-27251218 FORWARD LENGTH=1325	TPmsPQQVNQR	M3 Oxidation, S4 Phospho	100%, 100%	1,000.00, 70.88	157.11	1	41.68	29.76	2	1380.59	691.303	2	0.00593	4.29	1256	1266
AT1G30450.1	| Symbols: CCC1, ATCCC1, HAP5 | cation-chloride co-transporter 1 | chr1:10762905-10769061 FORWARD LENGTH=975	SmTGEQIQAPSsPR	M2 Oxidation, S12 Phospho	100%, 100%	1,000.00, 24.95	289.34	0.9985	40.58	30.48	2	1583.67	792.842	2	0.00447	2.82	100	113
AT3G13530.1	| Symbols: MAPKKK7, MAP3KE1 | mitogen-activated protein kinase kinase kinase 7 | chr3:4411934-4419320 REVERSE LENGTH=1368	VSEGKPNEASTSmPTSNVNQGDsPVADGGK	M13 Oxidation, S23 Phospho	100%, 100%	1,000.00, 66.82	231.73	1	66.57	33.1	2	3055.32	1019.45	3	0.00936	3.06	481	510
AT3G07020.2	| Symbols: | UDP-Glycosyltransferase superfamily protein | chr3:2218120-2221590 REVERSE LENGTH=637	VWtmPLEGSSSSDK	T3 Phospho, M4 Oxidation	100%, 100%	168.61, 1,000.00	173.09	1	37.73	30.29	2	1618.66	810.338	2	0.00329	2.03	80	93
AT1G26270.1	| Symbols: | Phosphatidylinositol 3- and 4-kinase family protein | chr1:9089822-9091714 REVERSE LENGTH=630	SSsTPcLSPmR	S3 Phospho, M10 Oxidation	49%, 100%	0.00, 1,000.00	111.56	0.9737	15.91	27.37	2	1317.52	659.765	2	0.00655	4.97	113	123
AT1G26270.1	| Symbols: | Phosphatidylinositol 3- and 4-kinase family protein | chr1:9089822-9091714 REVERSE LENGTH=630	SSStPcLSPmR	T4 Phospho, M10 Oxidation	25%, 100%	0.00, 1,000.00	98.28	0.9374	13.56	27.23	2	1317.51	659.763	2	0.00241	1.83	113	123
AT5G18190.1	| Symbols: | Protein kinase family protein | chr5:6010215-6013724 REVERSE LENGTH=691	DIAmEGGsAEK	M4 Oxidation, S8 Phospho	100%, 100%	1,000.00, 1,000.00	124.71	0.9994	20.32	26.75	2	1202.46	602.235	2	0.00337	2.8	95	105
AT5G55860.1	| Symbols: | Plant protein of unknown function (DUF827) | chr5:22610146-22612166 FORWARD LENGTH=649	mASESsPQQHYK	M1 Oxidation, S6 Phospho	100%, 100%	1,000.00, 24.95	210.61	0.9978	36.6	28.47	2	1487.58	744.799	2	0.00893	6	585	596
AT1G33990.1	| Symbols: ATMES14, MES14 | methyl esterase 14 | chr1:12355909-12357894 FORWARD LENGTH=348	ALSmAIHQAQLsQR	M4 Oxidation, S12 Phospho	100%, 100%	1,000.00, 285.07	243.02	1	52.17	30.98	2	1648.78	825.398	2	0.00547	3.32	44	57
AT2G32730.1	| Symbols: | 26S proteasome regulatory complex, non-ATPase subcomplex, Rpn2/Psmd1 subunit | chr2:13880189-13885464 FORWARD LENGTH=1004	EGDSmQVDsPAAVEK	M5 Oxidation, S9 Phospho	100%, 100%	1,000.00, 138.75	202.99	1	39.53	30.12	2	1657.66	829.839	2	0.00971	5.86	888	902
AT3G56240.1	| Symbols: CCH | copper chaperone | chr3:20863460-20864402 REVERSE LENGTH=121	VGmscQGcVGAVNR	M3 Oxidation, S4 Phospho	100%, 100%	1,000.00, 1,000.00	241.85	1	82.26	28.89	2	1589.62	795.817	2	0.00344	2.16	9	22
AT5G19050.1	| Symbols: | alpha/beta-Hydrolases superfamily protein | chr5:6369307-6371726 FORWARD LENGTH=361	SSsmAGGGSGSGDYGGPIK	S3 Phospho, M4 Oxidation	33%, 100%	0.00, 1,000.00	253.37	0.9971	93.79	29.23	2	1766.69	884.35	2	0.00329	1.86	56	74
AT5G19050.1	| Symbols: | alpha/beta-Hydrolases superfamily protein | chr5:6369307-6371726 FORWARD LENGTH=361	SSSmAGGGSGsGDYGGPIK	M4 Oxidation, S11 Phospho	100%, 49%	1,000.00, 0.00	142.51	0.9966	38.08	29.17	2	1766.68	884.349	2	0.00149	0.845	56	74
AT2G41900.1	| Symbols: | CCCH-type zinc finger protein with ARM repeat domain | chr2:17491352-17493502 FORWARD LENGTH=716	NVVEPIsPmSAR	S7 Phospho, M9 Oxidation	50%, 100%	0.00, 1,000.00	106.15	0.9739	11.54	30.09	2	1394.63	698.323	2	0.00493	3.53	560	571
AT3G25690.1	| Symbols: CHUP1 | Hydroxyproline-rich glycoprotein family protein | chr3:9354061-9357757 FORWARD LENGTH=1004	LmLEYAGsER	M2 Oxidation, S8 Phospho	100%, 98%	1,000.00, 17.78	127.58	0.9982	24.33	29.51	2	1263.53	632.772	2	0.00779	6.16	392	401
AT1G71710.2	| Symbols: | DNAse I-like superfamily protein | chr1:26973796-26976747 REVERSE LENGTH=655	ADsFKGISDDDSTQTGmK	S3 Phospho, M17 Oxidation	100%, 100%	60.22, 1,000.00	125.65	0.9989	17.04	30.43	2	1997.8	999.907	2	0.00583	2.92	295	312
AT2G43410.3	| Symbols: FPA | RNA binding | chr2:18026397-18030989 REVERSE LENGTH=901	DGsVDGFTPmGVDER	S3 Phospho, M10 Oxidation	100%, 100%	107.02, 1,000.00	187.18	1	50.66	29.11	2	1676.64	839.329	2	0.00419	2.5	405	419
AT5G16880.3	| Symbols: | Target of Myb protein 1 | chr5:5549658-5551021 FORWARD LENGTH=297	ISAGVSSmsFK	M8 Oxidation, S9 Phospho	100%, 98%	1,000.00, 19.53	192.5	0.9974	26.58	28.9	2	1208.52	605.267	2	0.00445	3.68	27	37
AT1G23080.1	| Symbols: PIN7, ATPIN7 | Auxin efflux carrier family protein | chr1:8180768-8183406 REVERSE LENGTH=619	LsNFGPADmYSVQSSR	S2 Phospho, M9 Oxidation	100%, 100%	60.19, 1,000.00	134.77	0.9994	31.37	31.15	2	1853.78	927.895	2	0.00955	5.15	264	279
AT3G22520.1	| Symbols: | unknown protein; INVOLVED IN: biological_process unknown; LOCATED IN: chloroplast stroma, chloroplast, chloroplast envelope; EXPRESSED IN: 24 plant structures; EXPRESSED DURING: 13 growth stages; BEST Arabidopsis thaliana protein match	DSSVLVSVsSPmR	S9 Phospho, M12 Oxidation	0%, 100%	0.00, 1,000.00	240.59	0.9977	41.76	30.54	2	1458.65	730.333	2	0.00813	5.57	0	0
AT4G09000.1	| Symbols: GRF1, GF14 CHI | general regulatory factor 1 | chr4:5775387-5777157 FORWARD LENGTH=267	DNLtLWTSDmQDDVADDIK	T4 Phospho, M10 Oxidation	33%, 100%	0.00, 1,000.00	30.74	0.9343	9.48	32.21	2	2289.95	764.323	3	0.0113	4.95	234	252
AT4G09000.1	| Symbols: GRF1, GF14 CHI | general regulatory factor 1 | chr4:5775387-5777157 FORWARD LENGTH=267	DNLTLWTsDmQDDVADDIK	S8 Phospho, M10 Oxidation	100%, 100%	27.96, 1,000.00	94.09	0.987	16.31	32.19	2	2289.94	1145.98	2	0.00853	3.72	234	252
AT2G33620.3	| Symbols: | AT hook motif DNA-binding family protein | chr2:14234749-14236563 FORWARD LENGTH=351	VAPTQVLmTPSsPQSR	M8 Oxidation, S12 Phospho	100%, 99%	1,000.00, 20.19	159.56	0.9939	19.47	31.38	2	1793.85	598.956	3	0.00716	3.99	303	318
AT3G14172.1	| Symbols: | FUNCTIONS IN: molecular_function unknown; INVOLVED IN: biological_process unknown; LOCATED IN: cellular_component unknown; BEST Arabidopsis thaliana protein match is: COP1-interacting protein-related (TAIR:AT1G72410.1); Has 30201 Blast hits to 17322 proteins in 780 species: Archae - 12; Bacteria - 1396; Metazoa - 17338; Fungi - 3422; Plants - 5037; Viruses - 0; Other Eukaryotes - 299…	LSsDLSSSAGmEK	S3 Phospho, M11 Oxidation	100%, 100%	52.40, 1,000.00	175.66	0.9983	36.77	29.21	2	1406.57	704.291	2	0.00277	1.97	336	348
AT1G69260.1	| Symbols: AFP1 | ABI five binding protein | chr1:26039314-26040570 FORWARD LENGTH=345	SSsVVVTmPLFR	S3 Phospho, M8 Oxidation	33%, 100%	0.00, 1,000.00	95.81	0.9983	33.34	30.93	2	1417.67	709.844	2	0.00487	3.43	69	80
AT5G66930.2	| Symbols: | unknown protein; CONTAINS InterPro DOMAIN/s: Protein of unknown function DUF1649 (InterPro:IPR012445); Has 251 Blast hits to 251 proteins in 113 species: Archae - 0; Bacteria - 0; Metazoa - 91; Fungi - 85; Plants - 58; Viruses - 0; Other Eukaryotes - 17 (source: NCBI BLink). | chr5:26725997-26727549 FORWARD LENGTH=215	SQIcLsFyEVK	S6 Phospho, Y8 Phospho	100%, 100%	52.40, 79.48	103.21	0.9572	8.32	29.23	2	1532.61	767.311	2	0.00567	3.7	83	93
AT3G16270.1	| Symbols: | ENTH/VHS family protein | chr3:5513701-5516540 FORWARD LENGTH=690	SLtmENENFSR	T3 Phospho, M4 Oxidation	100%, 100%	23.19, 1,000.00	175.65	0.9997	46.4	28.49	2	1422.55	712.284	2	0.00423	2.97	209	219
AT1G66670.1	| Symbols: CLPP3, NCLPP3 | CLP protease proteolytic subunit 3 | chr1:24863995-24865646 REVERSE LENGTH=309	VmIHQPLGtAGGK	M2 Oxidation, T9 Phospho	100%, 100%	1,000.00, 1,000.00	164.41	1	49	30.87	2	1403.67	702.842	2	0.00563	4.01	186	198
AT4G36630.1	| Symbols: EMB2754 | Vacuolar sorting protein 39 | chr4:17272088-17276524 REVERSE LENGTH=1000	GSSGISDDmESSsPR	M9 Oxidation, S13 Phospho	100%, 98%	1,000.00, 20.98	220.5	0.9984	41.99	28.25	2	1606.59	804.3	2	0.00391	2.43	401	415
AT4G36630.1	| Symbols: EMB2754 | Vacuolar sorting protein 39 | chr4:17272088-17276524 REVERSE LENGTH=1000	GSsGISDDmESSSPR	S3 Phospho, M9 Oxidation	100%, 100%	24.95, 1,000.00	99.31	0.9616	14.58	28.25	2	1606.59	804.3	2	0.00381	2.37	401	415
AT1G56660.1	| Symbols: | unknown protein; Has 665200 Blast hits to 205811 proteins in 4684 species: Archae - 3320; Bacteria - 107592; Metazoa - 249086; Fungi - 76753; Plants - 38542; Viruses - 3008; Other Eukaryotes - 186899 (source: NCBI BLink). | chr1:21238809-21240377 FORWARD LENGTH=522	EHDEtDQEmKEK	T5 Phospho, M9 Oxidation	100%, 100%	1,000.00, 1,000.00	18.12	0.9167	14.32	28.83	2	1613.62	807.818	2	0.029	17.9	234	245
AT4G35780.1	| Symbols: | ACT-like protein tyrosine kinase family protein | chr4:16946729-16950405 REVERSE LENGTH=570	VQTESGVmtAETGTYR	M8 Oxidation, T9 Phospho	100%, 100%	1,000.00, 47.48	214.12	1	39.5	30.96	2	1824.75	913.385	2	-0.00527	-2.88	437	452
AT2G16485.1	| Symbols: | nucleic acid binding;zinc ion binding;DNA binding | chr2:7137269-7145222 REVERSE LENGTH=1773	NSQDTWSQGGSLPSPtPNQItTPTAK	T16 Phospho, T21 Phospho	98%, 33%	17.20, 0.00	179.79	0.9987	21.05	33.27	2	2872.24	958.421	3	0.0104	3.63	1410	1435
AT2G16485.1	| Symbols: | nucleic acid binding;zinc ion binding;DNA binding | chr2:7137269-7145222 REVERSE LENGTH=1773	WSPtKPSPQSANQSmNYSVAQSGQSQTSR	T4 Phospho, M15 Oxidation	2%, 100%	0.00, 1,000.00	103.97	0.9934	30.58	33.55	2	3234.42	1079.15	3	0.0149	4.59	1443	1471
AT2G16485.1	| Symbols: | nucleic acid binding;zinc ion binding;DNA binding | chr2:7137269-7145222 REVERSE LENGTH=1773	WsPTKPSPQSANQSmNYSVAQSGQSQTSR	S2 Phospho, M15 Oxidation	91%, 100%	17.11, 1,000.00	164.39	0.9975	43.98	33.53	2	3234.42	1079.15	3	0.0125	3.85	1443	1471
AT1G58025.1	| Symbols: | DNA-binding bromodomain-containing protein | chr1:21458219-21461757 REVERSE LENGTH=572	smEETGDEPVNSAAEK	S1 Phospho, M2 Oxidation	99%, 100%	21.95, 1,000.00	123.71	0.9974	23.1	29.2	2	1788.69	895.351	2	0.0111	6.2	458	473
AT5G10020.2	| Symbols: | Leucine-rich receptor-like protein kinase family protein | chr5:3133514-3136949 FORWARD LENGTH=1000	FSDQPVmLDVYsPDR	M7 Oxidation, S12 Phospho	100%, 100%	1,000.00, 26.20	149.19	0.9944	23.2	31.09	2	1863.79	932.901	2	0.0115	6.17	685	699
AT5G47910.1	| Symbols: RBOHD, ATRBOHD | respiratory burst oxidase homologue D | chr5:19397585-19401768 FORWARD LENGTH=921	ILSQmLsQK	M5 Oxidation, S7 Phospho	100%, 100%	1,000.00, 59.15	71.75	0.9989	15.36	29.57	2	1142.54	572.279	2	0.00359	3.14	341	349
AT2G40980.1	| Symbols: | Protein kinase superfamily protein | chr2:17102090-17104443 FORWARD LENGTH=617	mPsPVYASSSNALEAK	M1 Oxidation, S3 Phospho	100%, 100%	1,000.00, 112.12	161.79	0.9959	12.69	31.56	2	1746.76	874.386	2	0.00483	2.77	93	108
AT1G24267.1	| Symbols: | Protein of unknown function (DUF1664) | chr1:8604451-8607241 REVERSE LENGTH=343	GPLQHTQSmsGLK	M9 Oxidation, S10 Phospho	100%, 2%	1,000.00, 0.00	94.29	0.9597	13.19	30.67	2	1478.66	740.339	2	0.00503	3.4	284	296
AT1G31440.1	| Symbols: | SH3 domain-containing protein | chr1:11256150-11258479 REVERSE LENGTH=439	LHSEmIAEEEAIGSsPK	M5 Oxidation, S15 Phospho	100%, 100%	1,000.00, 23.98	220.01	0.9727	18.89	35.79	2	1922.84	962.429	2	0.0104	5.42	250	266
AT5G40450.1	| Symbols: | unknown protein; FUNCTIONS IN: molecular_function unknown; INVOLVED IN: biological_process unknown; LOCATED IN: chloroplast, plasma membrane; EXPRESSED IN: 24 plant structures; EXPRESSED DURING: 13 growth stages; Has 30201 Blast hits to 17322 proteins in 780 species: Archae - 12; Bacteria - 1396; Metazoa - 17338; Fungi - 3422; Plants - 5037; Viruses - 0; Other Eukaryotes - 2996 (sour…	ESsDEALVSmLASR	S3 Phospho, M10 Oxidation	50%, 100%	0.00, 1,000.00	114.09	0.9952	24.51	30.27	2	1589.67	795.844	2	0.00887	5.58	1897	1910
AT5G13010.1	| Symbols: EMB3011 | RNA helicase family protein | chr5:4122747-4128660 FORWARD LENGTH=1255	RPQPSPSPmLAAAsPDAR	M9 Oxidation, S14 Phospho	100%, 100%	1,000.00, 163.27	197.11	0.9995	28.55	31.71	2	1943.9	648.974	3	0.00699	3.59	226	243
AT1G69980.1	| Symbols: | unknown protein; LOCATED IN: endomembrane system; EXPRESSED IN: 24 plant structures; EXPRESSED DURING: 15 growth stages; Has 30 Blast hits to 30 proteins in 12 species: Archae - 0; Bacteria - 0; Metazoa - 0; Fungi - 0; Plants - 30; Viruses - 0; Other Eukaryotes - 0 (source: NCBI BLink). | chr1:26356559-26357647 REVERSE LENGTH=205	QTVPmLGVSSsGR	M5 Oxidation, S11 Phospho	100%, 33%	1,000.00, 0.00	127.72	0.9938	19.14	30.29	2	1413.64	707.826	2	0.00459	3.25	186	198
AT5G08300.1	| Symbols: | Succinyl-CoA ligase, alpha subunit | chr5:2667579-2669672 FORWARD LENGTH=347	mGHAGAIVsGGK	M1 Oxidation, S9 Phospho	100%, 100%	1,000.00, 1,000.00	101.08	0.9515	7.98	28.42	2	1179.51	590.765	2	0.00405	3.43	296	307
AT5G09410.2	| Symbols: EICBP.B, CAMTA1 | ethylene induced calmodulin binding protein | chr5:2921457-2927291 FORWARD LENGTH=1007	VKsmVQYPEAR	S3 Phospho, M4 Oxidation	100%, 100%	103.38, 1,000.00	209.96	1	43.26	30.28	2	1402.63	702.324	2	0.00149	1.06	940	950
AT5G09410.2	| Symbols: EICBP.B, CAMTA1 | ethylene induced calmodulin binding protein | chr5:2921457-2927291 FORWARD LENGTH=1007	smVQYPEAR	S1 Phospho, M2 Oxidation	100%, 100%	84.46, 1,000.00	123.43	0.9996	28.91	27.36	2	1175.47	588.744	2	0.00535	4.55	942	950
AT5G09390.1	| Symbols: | CD2-binding protein-related | chr5:2913591-2915803 FORWARD LENGTH=351	SAANDTEmDDDsGNEK	M8 Oxidation, S12 Phospho	100%, 100%	1,000.00, 125.88	287.78	1	68.93	25.17	2	1793.6	897.806	2	0.00331	1.85	147	162
AT5G10950.1	| Symbols: | Tudor/PWWP/MBT superfamily protein | chr5:3459557-3461632 REVERSE LENGTH=395	AVDEmsDGEPLVSFLK	M5 Oxidation, S6 Phospho	100%, 100%	1,000.00, 62.06	98.93	0.9989	24.31	31.66	2	1831.81	916.91	2	0.0105	5.75	341	356
AT5G25590.1	| Symbols: | Protein of unknown function (DUF630 and DUF632) | chr5:8906684-8909847 REVERSE LENGTH=775	AIsLPSmAVR	S3 Phospho, M7 Oxidation	100%, 100%	93.05, 1,000.00	124.72	0.9986	19.96	30.36	2	1139.54	570.779	2	0.00275	2.41	0	0
AT1G73630.1	| Symbols: | EF hand calcium-binding protein family | chr1:27684748-27685239 FORWARD LENGTH=163	SmGTsYTEEELNR	M2 Oxidation, S5 Phospho	100%, 100%	1,000.00, 23.98	237.13	0.999	63.33	28.58	2	1611.62	806.817	2	0.00677	4.2	47	59
AT3G23310.1	| Symbols: | AGC (cAMP-dependent, cGMP-dependent and protein kinase C) kinase family protein | chr3:8339799-8343355 FORWARD LENGTH=568	sQmEQLQNWQR	S1 Phospho, M3 Oxidation	100%, 100%	1,000.00, 1,000.00	179.4	1	45.8	30.05	2	1542.63	772.324	2	0.00535	3.47	302	312
AT3G14940.1	| Symbols: ATPPC3, PPC3 | phosphoenolpyruvate carboxylase 3 | chr3:5025584-5029476 FORWARD LENGTH=968	mAsIDAQLR	M1 Oxidation, S3 Phospho	100%, 100%	1,000.00, 1,000.00	190.08	1	71.02	28.87	2	1099.48	550.746	2	0.00391	3.56	9	17
AT2G47330.1	| Symbols: | P-loop containing nucleoside triphosphate hydrolases superfamily protein | chr2:19429083-19431617 REVERSE LENGTH=760	AVDAGmLDYDsDDNPIVVDK	M6 Oxidation, S11 Phospho	100%, 50%	1,000.00, 0.00	59.62	0.9171	11.53	31.68	2	2246.94	1124.48	2	0.0114	5.09	150	169
AT4G35320.1	| Symbols: | unknown protein; BEST Arabidopsis thaliana protein match is: unknown protein (TAIR:AT2G17300.1); Has 30201 Blast hits to 17322 proteins in 780 species: Archae - 12; Bacteria - 1396; Metazoa - 17338; Fungi - 3422; Plants - 5037; Viruses	SKsVSAmGEQAGSSVK	S3 Phospho, M7 Oxidation	100%, 100%	27.96, 1,000.00	107.94	0.9989	35.36	31.05	2	1647.72	824.869	2	0.00599	3.63	0	0
AT5G57870.1	| Symbols: eIFiso4G1 | MIF4G domain-containing protein / MA3 domain-containing protein | chr5:23439755-23443433 FORWARD LENGTH=780	LLPQGsSGImSGK	S6 Phospho, M10 Oxidation	100%, 100%	26.20, 1,000.00	91.64	0.9461	11.35	30.57	2	1369.64	685.826	2	0.00621	4.53	555	567
AT5G23150.1	| Symbols: HUA2 | Tudor/PWWP/MBT domain-containing protein | chr5:7786173-7792080 FORWARD LENGTH=1392	msPQLVLTNK	M1 Oxidation, S2 Phospho	100%, 100%	1,000.00, 103.31	115.16	0.9963	12.66	30.36	2	1225.58	613.799	2	0.00471	3.84	544	553
AT5G56980.1	| Symbols: | unknown protein; FUNCTIONS IN: molecular_function unknown; INVOLVED IN: biological_process unknown; LOCATED IN: endomembrane system; EXPRESSED IN: 18 plant structures; EXPRESSED DURING: 12 growth stages; BEST Arabidopsis thaliana prote	sINmSYFK	S1 Phospho, M4 Oxidation	100%, 100%	84.46, 1,000.00	65.96	0.9349	8	27.13	2	1084.44	543.225	2	0.00571	5.26	0	0
AT4G09900.1	| Symbols: ATMES12, MES12 | methyl esterase 12 | chr4:6221767-6223924 REVERSE LENGTH=349	ALSmAIHQAQVsQR	M4 Oxidation, S12 Phospho	100%, 100%	1,000.00, 177.78	150.38	1	58.11	31.48	2	1634.77	818.39	2	0.00521	3.19	45	58
AT2G39810.1	| Symbols: HOS1 | ubiquitin-protein ligases | chr2:16612941-16617802 FORWARD LENGTH=927	SDETsDDEDELTSFGSmPVK	S5 Phospho, M17 Oxidation	33%, 100%	0.00, 1,000.00	103.1	0.9961	30.85	30.09	2	2283.87	1142.94	2	0.0103	4.52	898	917
AT4G18120.2	| Symbols: AML3, ML3 | MEI2-like 3 | chr4:10038878-10041950 FORWARD LENGTH=730	sPETSSmGSVAFR	S1 Phospho, M7 Oxidation	100%, 100%	50.19, 1,000.00	151.96	0.9987	24.96	29.86	2	1450.59	726.3	2	0.00609	4.2	484	496
AT1G20200.1	| Symbols: EMB2719, HAP15 | PAM domain (PCI/PINT associated module) protein | chr1:7001409-7004154 REVERSE LENGTH=488	DNNTPSQsIISSSTSTmQNLK	S8 Phospho, M17 Oxidation	33%, 100%	0.00, 1,000.00	169.95	0.9977	34.32	32.67	2	2348.03	783.684	3	0.0085	3.62	9	29
AT1G20200.1	| Symbols: EMB2719, HAP15 | PAM domain (PCI/PINT associated module) protein | chr1:7001409-7004154 REVERSE LENGTH=488	DNNTPSQSIIsSSTSTmQNLK	S11 Phospho, M17 Oxidation	24%, 100%	0.00, 1,000.00	112.34	0.9935	22.22	32.65	2	2348.03	783.684	3	0.00958	4.08	9	29
AT5G16730.1	| Symbols: | Plant protein of unknown function (DUF827) | chr5:5497890-5500775 FORWARD LENGTH=853	IDESDKTSTENIDEtGNALTAEDQLTmEK	T15 Phospho, M27 Oxidation	19%, 100%	0.00, 1,000.00	54.8	0.9919	19.51	33.29	2	3293.42	1098.81	3	0.0146	4.42	800	828
AT3G19770.2	| Symbols: ATVPS9A, VPS9A, VPS9 | Vacuolar sorting protein 9 (VPS9) domain | chr3:6867742-6869114 FORWARD LENGTH=384	SSDsLSGTNELLNINSETPmK	S4 Phospho, M20 Oxidation	33%, 100%	0.00, 1,000.00	193.19	0.9976	73.33	32.79	2	2332.03	1167.02	2	0.0113	4.86	170	190
AT1G27430.1	| Symbols: | GYF domain-containing protein | chr1:9521045-9526928 REVERSE LENGTH=1492	SPtPVPmGNPSDPNPK	T3 Phospho, M7 Oxidation	0%, 100%	0.00, 1,000.00	186.56	0.9487	18.09	31.01	2	1729.74	865.877	2	0.000533	0.308	50	65
AT1G27430.1	| Symbols: | GYF domain-containing protein | chr1:9521045-9526928 REVERSE LENGTH=1492	sPTPVPmGNPSDPNPK	S1 Phospho, M7 Oxidation	100%, 100%	23.20, 1,000.00	186.59	0.9335	21.61	30.78	2	1729.72	865.868	2	-0.018	-10.4	50	65
AT2G45200.1	| Symbols: GOS12, ATGOS12 | golgi snare 12 | chr2:18637689-18639640 REVERSE LENGTH=239	ASGSmsPGVQVLR	M5 Oxidation, S6 Phospho	100%, 99%	1,000.00, 24.95	135.89	0.9989	34.56	30.41	2	1383.63	692.82	2	0.00459	3.32	141	153
AT5G65700.1	| Symbols: BAM1 | Leucine-rich receptor-like protein kinase family protein | chr5:26281826-26284945 FORWARD LENGTH=1003	DQPmTESAPESELsPK	M4 Oxidation, S14 Phospho	100%, 99%	1,000.00, 20.19	87.44	0.9376	8.08	30.39	2	1840.75	921.382	2	0.00559	3.04	976	991
AT4G38900.1	| Symbols: | Basic-leucine zipper (bZIP) transcription factor family protein | chr4:18139564-18141520 REVERSE LENGTH=553	SVsVDScFmEK	S3 Phospho, M9 Oxidation	100%, 100%	46.29, 1,000.00	120.42	0.9672	14.8	27.23	2	1383.52	692.765	2	0.00731	5.28	319	329
AT1G24180.1	| Symbols: IAR4 | Thiamin diphosphate-binding fold (THDP-binding) superfamily protein | chr1:8560777-8563382 REVERSE LENGTH=393	YHGHsmSDPGSTYR	S5 Phospho, M6 Oxidation	100%, 100%	23.20, 1,000.00	190.23	0.9985	35.07	27.89	2	1689.63	845.821	2	0.00387	2.29	292	305
AT1G24180.1	| Symbols: IAR4 | Thiamin diphosphate-binding fold (THDP-binding) superfamily protein | chr1:8560777-8563382 REVERSE LENGTH=393	YHGHSmsDPGSTYR	M6 Oxidation, S7 Phospho	100%, 2%	1,000.00, 0.00	136.92	0.9517	13.99	27.88	2	1689.63	564.217	3	0.00405	2.39	292	305
AT1G53440.1	| Symbols: | Leucine-rich repeat transmembrane protein kinase | chr1:19945959-19951562 FORWARD LENGTH=1035	SSSsmDGPWVDSSFSDPSK	S4 Phospho, M5 Oxidation	25%, 100%	0.00, 1,000.00	83.88	0.9777	24.16	29.87	2	2097.8	1049.91	2	0.0163	7.78	988	1006
AT3G52400.1	| Symbols: SYP122, ATSYP122 | syntaxin of plants 122 | chr3:19425835-19427032 REVERSE LENGTH=341	TSVADGSsPPHSHNIEmSK	S8 Phospho, M17 Oxidation	50%, 100%	0.00, 1,000.00	203.57	0.995	27.06	31.39	2	2075.87	692.963	3	0.00546	2.63	11	29
AT5G58040.1	| Symbols: ATFIP1[V], FIPS5, ATFIPS5, FIP1[V] | homolog of yeast FIP1 [V] | chr5:23488865-23494000 FORWARD LENGTH=1196	mSFTsPQSAVQEDDGGESK	M1 Oxidation, S5 Phospho	100%, 33%	1,000.00, 0.00	235.96	0.9981	57.59	29.83	2	2094.81	1048.41	2	0.00393	1.88	593	611
AT3G55320.1	| Symbols: PGP20 | P-glycoprotein 20 | chr3:20507391-20513393 REVERSE LENGTH=1408	RQDsFEmR	S4 Phospho, M7 Oxidation	100%, 100%	1,000.00, 1,000.00	55.73	0.9663	9.62	28.09	2	1163.45	582.73	2	0.00281	2.42	744	751
AT4G10750.1	| Symbols: | Phosphoenolpyruvate carboxylase family protein | chr4:6618724-6619800 FORWARD LENGTH=358	mGLVNEsDSEDSSEHDK	M1 Oxidation, S7 Phospho	100%, 100%	1,000.00, 27.96	100.84	0.9199	9.98	28.45	2	1973.72	987.869	2	0.00407	2.06	332	348
AT4G10750.1	| Symbols: | Phosphoenolpyruvate carboxylase family protein | chr4:6618724-6619800 FORWARD LENGTH=358	mGLVNESDsEDSSEHDK	M1 Oxidation, S9 Phospho	100%, 1%	1,000.00, 0.00	105.37	0.9964	20.24	28.67	2	1973.73	987.871	2	0.00849	4.3	332	348
AT2G17410.1	| Symbols: | ARID/BRIGHT DNA-binding domain-containing protein | chr2:7559869-7563474 FORWARD LENGTH=786	SFLLDDASDGNESGtEEDQSAFmK	T15 Phospho, M23 Oxidation	33%, 100%	0.00, 1,000.00	114.27	0.9948	27.01	31.33	2	2688.05	1345.03	2	0.00653	2.43	479	502
AT1G09780.1	| Symbols: | Phosphoglycerate mutase, 2,3-bisphosphoglycerate-independent | chr1:3165550-3167812 REVERSE LENGTH=557	AHGTAVGLPSEDDmGNsEVGHNALGAGR	M14 Oxidation, S17 Phospho	100%, 50%	1,000.00, 0.00	155.97	0.9303	12.59	33.06	2	2814.21	939.078	3	0.00873	3.1	64	91
AT1G20370.1	| Symbols: | Pseudouridine synthase family protein | chr1:7051846-7053588 REVERSE LENGTH=549	VNDETsEGTTmEER	S6 Phospho, M11 Oxidation	25%, 100%	0.00, 1,000.00	107.17	0.9422	12.14	31.8	2	1692.62	847.319	2	0.00541	3.2	527	540
AT1G53310.3	| Symbols: ATPPC1, PEPC1, ATPEPC1, PPC1 | phosphoenolpyruvate carboxylase 1 | chr1:19884261-19888070 REVERSE LENGTH=967	mAsIDVHLR	M1 Oxidation, S3 Phospho	100%, 100%	1,000.00, 1,000.00	193.23	1	65.67	29.03	2	1136.51	569.26	2	0.00115	1.01	9	17
AT3G56850.1	| Symbols: AREB3, DPBF3 | ABA-responsive element binding protein 3 | chr3:21046554-21047894 REVERSE LENGTH=297	ALGsmNLDELLK	S4 Phospho, M5 Oxidation	100%, 100%	1,000.00, 1,000.00	67.42	0.951	9.66	30.46	2	1398.65	700.333	2	0.00407	2.91	40	51
AT4G30780.1	| Symbols: | unknown protein; BEST Arabidopsis thaliana protein match is: unknown protein (TAIR:AT2G24100.1); Has 109 Blast hits to 109 proteins in 18 species: Archae - 0; Bacteria - 0; Metazoa - 1; Fungi - 0; Plants - 95; Viruses - 0; Other Eukary	LWsPGTSSSTmAPAK	S3 Phospho, M11 Oxidation	100%, 100%	112.12, 1,000.00	161.93	0.9994	25.73	30.77	2	1615.7	808.859	2	0.00735	4.55	0	0
AT3G08680.2	| Symbols: | Leucine-rich repeat protein kinase family protein | chr3:2638591-2640590 FORWARD LENGTH=640	ASsPEmIR	S3 Phospho, M6 Oxidation	100%, 100%	27.96, 1,000.00	86.36	0.9881	15.76	26.92	2	985.4	493.707	2	0.00553	5.61	627	634
AT5G41950.1	| Symbols: | Tetratricopeptide repeat (TPR)-like superfamily protein | chr5:16785825-16789360 FORWARD LENGTH=565	NLsGKAETmSTNVER	S3 Phospho, M9 Oxidation	100%, 100%	81.16, 1,000.00	91.87	0.9981	17.99	31.5	2	1731.76	866.885	2	0.00585	3.38	477	491
AT5G41950.1	| Symbols: | Tetratricopeptide repeat (TPR)-like superfamily protein | chr5:16785825-16789360 FORWARD LENGTH=565	ESAsQPAENNPAmDLINR	S4 Phospho, M13 Oxidation	50%, 100%	0.00, 1,000.00	76.7	0.9566	25.38	31.73	2	2051.88	1026.95	2	0.0178	8.69	173	190
AT3G57530.1	| Symbols: CPK32, ATCPK32, CDPK32 | calcium-dependent protein kinase 32 | chr3:21296898-21299351 REVERSE LENGTH=538	EGFQImDTsQR	M6 Oxidation, S9 Phospho	100%, 100%	1,000.00, 23.19	122.07	0.9989	33.79	28.57	2	1406.56	704.287	2	0.00551	3.92	371	381
AT4G26130.1	| Symbols: | unknown protein; FUNCTIONS IN: molecular_function unknown; INVOLVED IN: biological_process unknown; LOCATED IN: endomembrane system; EXPRESSED IN: 23 plant structures; EXPRESSED DURING: 13 growth stages; BEST Arabidopsis thaliana prote	sINmPYFK	S1 Phospho, M4 Oxidation	100%, 100%	122.05, 1,000.00	141.6	0.99	47.61	27.85	2	1094.46	548.235	2	0.00519	4.74	0	0
AT1G11330.1	| Symbols: | S-locus lectin protein kinase family protein | chr1:3810372-3813416 FORWARD LENGTH=840	mEALTsDNESASNQIK	M1 Oxidation, S6 Phospho	100%, 99%	1,000.00, 24.95	267.51	0.9989	46.69	31.13	2	1832.76	917.385	2	0.00629	3.43	488	503
AT1G01440.1	| Symbols: | Protein of unknown function (DUF3133) | chr1:159935-162219 REVERSE LENGTH=664	EDLNESATsPmR	S9 Phospho, M11 Oxidation	99%, 100%	23.19, 1,000.00	151.49	0.9868	17.24	28.97	2	1444.56	723.287	2	0.00579	4.01	25	36
AT5G65410.1	| Symbols: ATHB25, ZFHD2, HB25, ZHD1 | homeobox protein 25 | chr5:26136179-26137018 FORWARD LENGTH=279	ERsEDPmETSSAEAGGGIR	S3 Phospho, M7 Oxidation	100%, 100%	45.56, 1,000.00	143.27	0.9989	24.24	31.22	2	2073.84	692.287	3	0.00871	4.2	173	191
AT5G23720.3	| Symbols: PHS1 | dual specificity protein phosphatase family protein | chr5:7998506-8002594 FORWARD LENGTH=920	cHGKVsmEWRQR	S6 Phospho, M7 Oxidation	100%, 100%	1,000.00, 1,000.00	49.68	0.9454	13.3	30.35	2	1668.69	835.353	2	-0.00943	-5.65	837	848
AT1G19350.4	| Symbols: BES1, BZR2 | Brassinosteroid signalling positive regulator (BZR1) family protein | chr1:6688841-6690165 FORWARD LENGTH=335	TsDGATSTSAAAAAAAmATR	S2 Phospho, M17 Oxidation	49%, 100%	0.00, 1,000.00	210.18	0.9972	41.09	30.99	1	1877.79	939.9	2	0.00333	1.77	2	21
AT4G30890.2	| Symbols: UBP24 | ubiquitin-specific protease 24 | chr4:15036383-15038825 REVERSE LENGTH=551	TDPIGLDNLSmsDGESDPVYK	M11 Oxidation, S12 Phospho	100%, 49%	1,000.00, 0.00	97.25	0.9557	14.22	32.43	2	2347.99	1175	2	0.00853	3.63	132	152
AT5G51820.1	| Symbols: PGM, ATPGMP, PGM1, STF1 | phosphoglucomutase | chr5:21063531-21067933 REVERSE LENGTH=623	ANGGFImSAsHNPGGPEYDWGIK	M7 Oxidation, S10 Phospho	100%, 50%	1,000.00, 0.00	79.72	0.9899	25.65	32.79	2	2500.07	834.363	3	0.0145	5.82	172	194
AT1G74690.1	| Symbols: IQD31 | IQ-domain 31 | chr1:28061498-28063924 REVERSE LENGTH=587	SGGmLETQNVGPEEIsDDEIELPEGK	M4 Oxidation, S16 Phospho	100%, 100%	1,000.00, 49.22	120.47	0.9989	22.33	33	2	2868.24	957.086	3	0.00909	3.17	64	89
AT3G61110.1	| Symbols: ARS27A, RS27A | ribosomal protein S27 | chr3:22611710-22612632 FORWARD LENGTH=86	LVQsPNSFFmDVK	S4 Phospho, M10 Oxidation	100%, 100%	46.67, 1,000.00	174.1	1	47.98	30.78	2	1606.72	804.365	2	0.00525	3.27	26	38
AT1G08720.1	| Symbols: EDR1, ATEDR1 | Protein kinase superfamily protein | chr1:2774089-2779077 FORWARD LENGTH=933	StAGTPEWmAPEVLR	T2 Phospho, M9 Oxidation	33%, 100%	0.00, 1,000.00	62.61	0.9931	20.88	31.41	2	1739.76	870.889	2	0.00367	2.11	826	840
AT1G08720.1	| Symbols: EDR1, ATEDR1 | Protein kinase superfamily protein | chr1:2774089-2779077 FORWARD LENGTH=933	STAGtPEWmAPEVLR	T5 Phospho, M9 Oxidation	33%, 100%	0.00, 1,000.00	66.87	0.9456	18.59	31.53	2	1739.77	870.893	2	0.0131	7.52	826	840
AT1G63480.1	| Symbols: | AT hook motif DNA-binding family protein | chr1:23539872-23541685 REVERSE LENGTH=361	DSsPmSDPNEPK	S3 Phospho, M5 Oxidation	50%, 100%	0.00, 1,000.00	89.95	0.9941	18.86	26.78	2	1398.51	700.26	2	0.00503	3.6	119	130
AT1G63480.1	| Symbols: | AT hook motif DNA-binding family protein | chr1:23539872-23541685 REVERSE LENGTH=361	DsSPmSDPNEPK	S2 Phospho, M5 Oxidation	50%, 100%	0.00, 1,000.00	110.96	0.9962	26.19	26.78	2	1398.51	700.261	2	0.00539	3.85	119	130
AT3G04840.1	| Symbols: | Ribosomal protein S3Ae | chr3:1329751-1331418 FORWARD LENGTH=262	LmDVHGDYsAEDVGVK	M2 Oxidation, S9 Phospho	100%, 100%	1,000.00, 26.20	187.95	0.9969	21.27	30.65	2	1829.76	915.885	2	0.000613	0.335	228	243
AT5G62000.3	| Symbols: ARF2, ARF1-BP, HSS, ORE14 | auxin response factor 2 | chr5:24910859-24914680 FORWARD LENGTH=859	SNIAPsSPDSSmLTR	S6 Phospho, M12 Oxidation	50%, 100%	0.00, 1,000.00	131.34	0.9177	11.06	30.51	2	1657.71	829.862	2	0.00823	4.96	414	428
AT3G01090.1	| Symbols: AKIN10, SNRK1.1, KIN10 | SNF1 kinase homolog 10 | chr3:31437-33977 REVERSE LENGTH=512	mHPAESVAsPVSHR	M1 Oxidation, S9 Phospho	100%, 100%	1,000.00, 43.77	92.79	0.9988	23.92	30.8	2	1599.69	534.238	3	0.00513	3.2	356	369
AT4G24230.1	| Symbols: ACBP3 | acyl-CoA-binding domain 3 | chr4:12567122-12568754 REVERSE LENGTH=364	SSNmVEEsDAEAENEEK	M4 Oxidation, S8 Phospho	100%, 100%	1,000.00, 64.24	161.41	1	47.17	28.35	2	1992.72	997.368	2	0.00735	3.69	196	212
AT3G49470.1	| Symbols: NACA2 | nascent polypeptide-associated complex subunit alpha-like protein 2 | chr3:18341072-18342273 FORWARD LENGTH=217	mPEIGATsQR	M1 Oxidation, S8 Phospho	100%, 99%	1,000.00, 20.98	90.43	0.9662	16.4	32.92	2	1184.5	593.255	2	0.00589	4.97	145	154
AT4G37930.1	| Symbols: SHM1, STM, SHMT1 | serine transhydroxymethyltransferase 1 | chr4:17831891-17834742 REVERSE LENGTH=517	STScymSSLPSEAVDEK	Y5 Phospho, M6 Oxidation	25%, 100%	0.00, 1,000.00	198.75	0.9985	45.52	29.9	2	1985.77	993.894	2	0.00979	4.93	24	40
AT4G37930.1	| Symbols: SHM1, STM, SHMT1 | serine transhydroxymethyltransferase 1 | chr4:17831891-17834742 REVERSE LENGTH=517	STscYmSSLPSEAVDEK	S3 Phospho, M6 Oxidation	33%, 100%	0.00, 1,000.00	206.32	0.9971	54.06	29.73	2	1985.77	993.89	2	0.00283	1.42	24	40
AT4G35300.1	| Symbols: TMT2 | tonoplast monosaccharide transporter2 | chr4:16796432-16799071 REVERSE LENGTH=739	GGsTmSVLSR	S3 Phospho, M5 Oxidation	99%, 100%	23.98, 1,000.00	93.94	0.9936	14.35	28.98	2	1089.46	545.737	2	0.00607	5.57	275	284
AT4G32551.2	| Symbols: LUG | LisH dimerisation motif;WD40/YVTN repeat-like-containing domain | chr4:15707863-15713359 FORWARD LENGTH=969	SAAASGQPAGQVLHSTSGGmsPQVQTR	M20 Oxidation, S21 Phospho	100%, 25%	1,000.00, 0.00	169.3	0.958	14.95	32.74	2	2705.23	902.751	3	0.00879	3.25	262	288
AT4G36150.1	| Symbols: | Disease resistance protein (TIR-NBS-LRR class) family | chr4:17104776-17108711 FORWARD LENGTH=1179	VLsSDVmPDLER	S3 Phospho, M7 Oxidation	100%, 100%	61.94, 1,000.00	113.79	0.9435	16.01	29.46	2	1455.62	728.816	2	-0.0144	-9.92	179	190
AT1G13740.1	| Symbols: AFP2 | ABI five binding protein 2 | chr1:4713969-4715158 FORWARD LENGTH=348	TTsLPAEmEEEWR	S3 Phospho, M8 Oxidation	99%, 100%	21.95, 1,000.00	165.56	0.9952	21.55	29.96	2	1673.67	837.844	2	0.00819	4.89	110	122
AT1G30620.1	| Symbols: HSR8, MUR4, UXE1 | NAD(P)-binding Rossmann-fold superfamily protein | chr1:10855496-10857970 FORWARD LENGTH=419	SmsLGGLDYADPK	M2 Oxidation, S3 Phospho	100%, 100%	1,000.00, 26.20	99.78	0.9404	13.89	29.62	2	1448.59	725.303	2	0.00181	1.25	16	28
AT5G59980.2	| Symbols: | Polymerase/histidinol phosphatase-like | chr5:24147207-24149783 FORWARD LENGTH=705	mATASsDDNLR	M1 Oxidation, S6 Phospho	100%, 33%	1,000.00, 0.00	48.45	0.9935	19.93	26.94	2	1275.48	638.748	2	0.00179	1.4	373	383
AT5G62090.1	| Symbols: SLK2 | SEUSS-like 2 | chr5:24935221-24938540 REVERSE LENGTH=816	SAsINNESYmR	S3 Phospho, M10 Oxidation	99%, 100%	23.19, 1,000.00	144.41	0.9697	19.87	27.94	2	1366.52	684.268	2	-0.00103	-0.751	93	103
AT2G40070.1	| Symbols: | BEST Arabidopsis thaliana protein match is: proline-rich family protein (TAIR:AT3G09000.1); Has 35333 Blast hits to 34131 proteins in 2444 species: Archae - 798; Bacteria - 22429; Metazoa - 974; Fungi - 991; Plants - 531; Viruses - 0;	APmYSSGSsVPAVNR	M3 Oxidation, S9 Phospho	100%, 25%	1,000.00, 0.00	204.54	0.9981	38.58	30.69	2	1617.69	809.852	2	0.00395	2.44	0	0
AT5G60050.1	| Symbols: | BTB/POZ domain-containing protein | chr5:24183680-24185264 REVERSE LENGTH=499	sRFFMEKmNSR	S1 Phospho, M8 Oxidation	100%, 100%	46.13, 26.20	52.81	0.924	7.15	30.11	2	1527.64	764.828	2	0.00611	4	126	136
AT1G60940.2	| Symbols: SNRK2-10, SNRK2.10, SRK2B | SNF1-related protein kinase 2.10 | chr1:22439398-22441896 REVERSE LENGTH=361	QVHAsmGEVR	S5 Phospho, M6 Oxidation	100%, 100%	1,000.00, 1,000.00	79.77	0.9989	14.81	28.85	2	1208.5	605.26	2	0.00367	3.04	350	359
AT1G67310.1	| Symbols: | Calmodulin-binding transcription activator protein with CG-1 and Ankyrin domains | chr1:25198182-25203126 REVERSE LENGTH=1016	VLsmSNSPEAR	S3 Phospho, M4 Oxidation	100%, 100%	27.96, 1,000.00	125.35	0.9986	33.86	29.01	2	1285.54	643.778	2	0.00337	2.62	960	970
AT2G01750.1	| Symbols: ATMAP70-3, MAP70-3 | microtubule-associated proteins 70-3 | chr2:328351-331848 FORWARD LENGTH=629	ISSPSLTmSSsFR	M8 Oxidation, S11 Phospho	100%, 91%	1,000.00, 15.97	108.75	0.9318	12.67	30.55	2	1494.65	748.33	2	0.00347	2.32	26	38
AT3G55610.2	| Symbols: P5CS2 | delta 1-pyrroline-5-carboxylate synthase 2 | chr3:20625005-20628989 REVERSE LENGTH=622	QLVNSsFADLQKPQmELDGK	S6 Phospho, M15 Oxidation	50%, 100%	0.00, 1,000.00	136.74	0.9534	14.94	32.29	2	2343.09	782.038	3	0.0111	4.75	74	93
AT5G40300.1	| Symbols: | Uncharacterised protein family (UPF0497) | chr5:16110778-16112701 FORWARD LENGTH=270	QDQSsPINFEmSSR	S5 Phospho, M11 Oxidation	50%, 100%	0.00, 1,000.00	152.87	0.9478	12.28	29.7	2	1720.68	861.348	2	0.00575	3.34	21	34
AT2G01470.1	| Symbols: STL2P, ATSEC12 | SEC12P-like 2 protein | chr2:212215-214435 REVERSE LENGTH=393	IImDPEKsEDDDESSSSSSSSR	M3 Oxidation, S8 Phospho	100%, 100%	1,000.00, 37.58	153.5	0.9451	8.31	31.23	2	2482.96	828.662	3	0.0106	4.27	36	57
AT3G43210.1	| Symbols: TES, ATNACK2, NACK2 | ATP binding microtubule motor family protein | chr3:15191429-15196021 FORWARD LENGTH=938	LWtDPHNmQHVR	T3 Phospho, M8 Oxidation	100%, 100%	1,000.00, 1,000.00	51.51	0.9691	11.86	30.46	2	1628.69	815.354	2	0.00221	1.36	877	888
AT2G36910.1	| Symbols: ATPGP1, PGP1, ABCB1 | ATP binding cassette subfamily B1 | chr2:15502162-15507050 FORWARD LENGTH=1286	NSVSsPImTR	S5 Phospho, M8 Oxidation	100%, 100%	23.98, 1,000.00	114.96	0.9278	9.42	29.3	2	1186.51	594.263	2	0.00575	4.84	630	639
AT2G37790.1	| Symbols: | NAD(P)-linked oxidoreductase superfamily protein | chr2:15838838-15840752 FORWARD LENGTH=314	GmsFVHETSPYK	M2 Oxidation, S3 Phospho	100%, 100%	1,000.00, 115.81	147.93	0.9994	31.4	29.77	2	1477.6	739.809	2	0.00829	5.61	293	304
AT5G50250.1	| Symbols: CP31B | chloroplast RNA-binding protein 31B | chr5:20452677-20453965 REVERSE LENGTH=289	mTSSVLTPsLK	M1 Oxidation, S9 Phospho	100%, 100%	1,000.00, 22.53	14.83	0.9223	12.04	29.9	2	1258.59	630.303	2	0.00243	1.93	1	11
AT4G13940.1	| Symbols: HOG1, EMB1395, SAHH1, MEE58, ATSAHH1 | S-adenosyl-L-homocysteine hydrolase | chr4:8054931-8056676 FORWARD LENGTH=485	DmsQADFGR	M2 Oxidation, S3 Phospho	100%, 100%	1,000.00, 1,000.00	123.94	0.9992	22.72	25.39	2	1121.39	561.703	2	0.00583	5.2	18	26
AT3G04470.1	| Symbols: | Ankyrin repeat family protein | chr3:1189841-1191853 REVERSE LENGTH=640	SSSSENsSPSWISWmR	S7 Phospho, M15 Oxidation	46%, 100%	0.00, 1,000.00	143.32	0.9984	32.75	30.33	2	1922.76	962.387	2	0.00889	4.62	555	570
AT3G04470.1	| Symbols: | Ankyrin repeat family protein | chr3:1189841-1191853 REVERSE LENGTH=640	SSSSENSsPSWISWmR	S8 Phospho, M15 Oxidation	16%, 100%	0.00, 1,000.00	92.48	0.9963	22.37	30.2	2	1922.76	962.386	2	0.00691	3.59	555	570
AT5G25820.1	| Symbols: | Exostosin family protein | chr5:8997248-8999574 REVERSE LENGTH=654	KILmsIPESR	M4 Oxidation, S5 Phospho	100%, 50%	1,000.00, 0.00	1.74	0.9446	14.48	33.64	2	1268.64	635.326	2	0.0177	13.9	601	610
AT3G06610.1	| Symbols: | DNA-binding enhancer protein-related | chr3:2060837-2061845 FORWARD LENGTH=115	VQsAmASIAASR	S3 Phospho, M5 Oxidation	33%, 100%	0.00, 1,000.00	0	0.9974	13.24	29.9	2	1286.57	644.295	2	0.00581	4.51	42	53
AT1G47500.1	| Symbols: ATRBP47C', RBP47C' | RNA-binding protein 47C' | chr1:17432682-17434805 FORWARD LENGTH=434	TsPTPPPPHWmR	S2 Phospho, M11 Oxidation	33%, 100%	0.00, 1,000.00	93.59	0.957	18.04	34.47	2	1498.65	750.33	2	0.00235	1.57	43	54
AT2G35110.1	| Symbols: GRL, NAP1, NAPP | transcription activators | chr2:14795970-14803525 REVERSE LENGTH=1425	QYYPSQDESmsPTSVR	M10 Oxidation, S11 Phospho	100%, 33%	1,000.00, 0.00	107.33	0.948	12.49	30.18	2	1969.78	985.899	2	0.00675	3.43	6	21
AT5G03700.1	| Symbols: | D-mannose binding lectin protein with Apple-like carbohydrate-binding domain | chr5:965874-967322 REVERSE LENGTH=482	NLGSDsFNSVEmSR	S6 Phospho, M12 Oxidation	50%, 100%	0.00, 1,000.00	173.26	1	41.44	29.2	2	1637.64	819.828	2	0.00141	0.862	468	481
AT5G50380.1	| Symbols: ATEXO70F1, EXO70F1 | exocyst subunit exo70 family protein F1 | chr5:20516382-20518433 REVERSE LENGTH=683	DESmGGSSSGsPSYGQR	M4 Oxidation, S11 Phospho	100%, 33%	1,000.00, 0.00	101.52	0.9989	34.42	27.29	2	1783.64	892.828	2	0.00577	3.23	564	580
AT3G04820.1	| Symbols: | Pseudouridine synthase family protein | chr3:1321453-1325949 REVERSE LENGTH=715	VGStEEIEDESmK	T4 Phospho, M12 Oxidation	1%, 100%	0.00, 1,000.00	163.13	0.9975	38.44	28.06	2	1548.59	775.304	2	0.00237	1.53	632	644
AT1G69220.1	| Symbols: SIK1 | Protein kinase superfamily protein | chr1:26020298-26026119 REVERSE LENGTH=836	mSTTsLPDSITR	M1 Oxidation, S5 Phospho	100%, 25%	1,000.00, 0.00	74.92	0.9808	15.37	30.05	2	1403.61	702.81	2	0.00553	3.94	231	242
AT5G60460.1	| Symbols: | Preprotein translocase Sec, Sec61-beta subunit protein | chr5:24317590-24317919 REVERSE LENGTH=109	LGGGGGVSSGGGSGVGSGsSNmLR	S19 Phospho, M22 Oxidation	49%, 100%	0.00, 1,000.00	168.72	0.9989	44.26	31.88	2	2088.9	1045.46	2	0.00723	3.46	41	64
AT1G48920.1	| Symbols: ATNUC-L1, PARL1, NUC-L1 | nucleolin like 1 | chr1:18098186-18101422 FORWARD LENGTH=557	SsDVEmVDAEK	S2 Phospho, M6 Oxidation	50%, 100%	0.00, 1,000.00	100.53	0.9612	14.33	31.19	2	1304.49	653.252	2	0.00567	4.35	0	0
AT4G00720.1	| Symbols: ATSK32, ASKTHETA, SK32 | shaggy-like protein kinase 32 | chr4:294116-297002 REVERSE LENGTH=472	mLVPGEPNISYIcsR	M1 Oxidation, S14 Phospho	100%, 33%	1,000.00, 0.00	131.65	0.9961	24.37	31.12	2	1830.81	916.414	2	0.00789	4.31	288	302
AT5G56890.1	| Symbols: | Protein kinase superfamily protein | chr5:23010801-23015559 REVERSE LENGTH=1113	GLSTSEmYTGsGR	M7 Oxidation, S11 Phospho	100%, 17%	1,000.00, 0.00	21.1	0.9321	13.77	29.16	2	1440.57	721.293	2	0.0122	8.44	1056	1068
AT5G64420.1	| Symbols: | DNA polymerase V family | chr5:25756416-25761122 FORWARD LENGTH=1306	mNTVANYDSDtAAAAAEVPGVASSGK	M1 Oxidation, T11 Phospho	100%, 25%	1,000.00, 0.00	114.06	0.9973	52.4	32.91	2	2592.12	1297.07	2	0.0137	5.3	36	61
AT1G31870.2	| Symbols: | unknown protein; FUNCTIONS IN: molecular_function unknown; INVOLVED IN: biological_process unknown; LOCATED IN: cytosol, nucleus; EXPRESSED IN: 25 plant structures; EXPRESSED DURING: 15 growth stages; CONTAINS InterPro DOMAIN/s: Protein of unknown function DUF2050, pre-mRNA-splicing factor (InterPro:IPR018609); Has 35333 Blast hits to 34131 proteins in 2444 species: Archae - 798; Bac…	SFGSNADLsPPGR	S9 Phospho	1	150.31	241.29	1	72.24	29.78	2	1383.58	692.799	2	0.00205	1.48	278	290
AT1G31870.2	| Symbols: | unknown protein; FUNCTIONS IN: molecular_function unknown; INVOLVED IN: biological_process unknown; LOCATED IN: cytosol, nucleus; EXPRESSED IN: 25 plant structures; EXPRESSED DURING: 15 growth stages; CONTAINS InterPro DOMAIN/s: Protein of unknown function DUF2050, pre-mRNA-splicing factor (InterPro:IPR018609); Has 35333 Blast hits to 34131 proteins in 2444 species: Archae - 798; Bac…	DSsPPQISK	S3 Phospho	1	23.19	108.79	0.9989	26.58	27.5	2	1037.45	519.731	2	0.00351	3.38	335	343
AT1G31870.2	| Symbols: | unknown protein; FUNCTIONS IN: molecular_function unknown; INVOLVED IN: biological_process unknown; LOCATED IN: cytosol, nucleus; EXPRESSED IN: 25 plant structures; EXPRESSED DURING: 15 growth stages; CONTAINS InterPro DOMAIN/s: Protein of unknown function DUF2050, pre-mRNA-splicing factor (InterPro:IPR018609); Has 35333 Blast hits to 34131 proteins in 2444 species: Archae - 798; Bac…	RDSsPPQISK	S4 Phospho	0.99	21.95	218	0.9987	42.42	29.13	2	1193.55	597.782	2	0.00521	4.36	334	343
AT1G31870.2	| Symbols: | unknown protein; FUNCTIONS IN: molecular_function unknown; INVOLVED IN: biological_process unknown; LOCATED IN: cytosol, nucleus; EXPRESSED IN: 25 plant structures; EXPRESSED DURING: 15 growth stages; CONTAINS InterPro DOMAIN/s: Protein of unknown function DUF2050, pre-mRNA-splicing factor (InterPro:IPR018609); Has 35333 Blast hits to 34131 proteins in 2444 species: Archae - 798; Bac…	EDTQSNIsPPR	S8 Phospho	1	112.13	185.85	1	50.32	29.23	2	1322.56	662.286	2	0.00707	5.34	110	120
AT1G31870.2	| Symbols: | unknown protein; FUNCTIONS IN: molecular_function unknown; INVOLVED IN: biological_process unknown; LOCATED IN: cytosol, nucleus; EXPRESSED IN: 25 plant structures; EXPRESSED DURING: 15 growth stages; CONTAINS InterPro DOMAIN/s: Protein of unknown function DUF2050, pre-mRNA-splicing factor (InterPro:IPR018609); Has 35333 Blast hits to 34131 proteins in 2444 species: Archae - 798; Bac…	DSQDSDLsPQRK	S8 Phospho	1	90.37	186.58	1	53.34	29.73	2	1454.61	728.311	2	0.00385	2.64	296	307
AT1G31870.2	| Symbols: | unknown protein; FUNCTIONS IN: molecular_function unknown; INVOLVED IN: biological_process unknown; LOCATED IN: cytosol, nucleus; EXPRESSED IN: 25 plant structures; EXPRESSED DURING: 15 growth stages; CONTAINS InterPro DOMAIN/s: Protein of unknown function DUF2050, pre-mRNA-splicing factor (InterPro:IPR018609); Has 35333 Blast hits to 34131 proteins in 2444 species: Archae - 798; Bac…	DSQDSDLsPQR	S8 Phospho	1	63.6	171.61	1	35.04	32.32	2	1326.51	664.263	2	0.00235	1.77	296	306
AT1G31870.2	| Symbols: | unknown protein; FUNCTIONS IN: molecular_function unknown; INVOLVED IN: biological_process unknown; LOCATED IN: cytosol, nucleus; EXPRESSED IN: 25 plant structures; EXPRESSED DURING: 15 growth stages; CONTAINS InterPro DOMAIN/s: Protein of unknown function DUF2050, pre-mRNA-splicing factor (InterPro:IPR018609); Has 35333 Blast hits to 34131 proteins in 2444 species: Archae - 798; Bac…	YLSEDLsPPR	S7 Phospho	1	81.39	166.33	0.9983	30.31	29.39	2	1255.55	628.783	2	0.00239	1.9	198	207
AT1G31870.2	| Symbols: | unknown protein; FUNCTIONS IN: molecular_function unknown; INVOLVED IN: biological_process unknown; LOCATED IN: cytosol, nucleus; EXPRESSED IN: 25 plant structures; EXPRESSED DURING: 15 growth stages; CONTAINS InterPro DOMAIN/s: Protein of unknown function DUF2050, pre-mRNA-splicing factor (InterPro:IPR018609); Has 35333 Blast hits to 34131 proteins in 2444 species: Archae - 798; Bac…	DLHGsPVSDVK	S5 Phospho	1	90.37	282.77	1	51.34	30.46	2	1232.55	617.282	2	0.00551	4.47	240	250
AT5G39570.1	| Symbols: | FUNCTIONS IN: molecular_function unknown; INVOLVED IN: biological_process unknown; LOCATED IN: cytosol, nucleus; EXPRESSED IN: 25 plant structures; EXPRESSED DURING: 14 growth stages; BEST Arabidopsis thaliana protein match is: glycine-rich protein (TAIR:AT3G29075.1); Has 30201 Blast hits to 17322 proteins in 780 species: Archae - 12; Bacteria - 1396; Metazoa - 17338; Fungi - 3422; P…	SGsGDDEEGSYGR	S3 Phospho	1	26.2	279.83	0.9995	115.7	25	2	1394.47	698.241	2	0.00515	3.69	337	349
AT5G39570.1	| Symbols: | FUNCTIONS IN: molecular_function unknown; INVOLVED IN: biological_process unknown; LOCATED IN: cytosol, nucleus; EXPRESSED IN: 25 plant structures; EXPRESSED DURING: 14 growth stages; BEST Arabidopsis thaliana protein match is: glycine-rich protein (TAIR:AT3G29075.1); Has 30201 Blast hits to 17322 proteins in 780 species: Archae - 12; Bacteria - 1396; Metazoa - 17338; Fungi - 3422; P…	SEEQEEGsYR	S8 Phospho	1	24.95	245.94	1	42.64	25.87	2	1292.46	647.237	2	0.00401	3.1	307	316
AT5G39570.1	| Symbols: | FUNCTIONS IN: molecular_function unknown; INVOLVED IN: biological_process unknown; LOCATED IN: cytosol, nucleus; EXPRESSED IN: 25 plant structures; EXPRESSED DURING: 14 growth stages; BEST Arabidopsis thaliana protein match is: glycine-rich protein (TAIR:AT3G29075.1); Has 30201 Blast hits to 17322 proteins in 780 species: Archae - 12; Bacteria - 1396; Metazoa - 17338; Fungi - 3422; P…	SEEQEEGsYRK	S8 Phospho	0.5	0	70.57	0.9996	30.9	28.36	2	1420.56	711.285	2	0.00425	2.99	307	317
AT5G39570.1	| Symbols: | FUNCTIONS IN: molecular_function unknown; INVOLVED IN: biological_process unknown; LOCATED IN: cytosol, nucleus; EXPRESSED IN: 25 plant structures; EXPRESSED DURING: 14 growth stages; BEST Arabidopsis thaliana protein match is: glycine-rich protein (TAIR:AT3G29075.1); Has 30201 Blast hits to 17322 proteins in 780 species: Archae - 12; Bacteria - 1396; Metazoa - 17338; Fungi - 3422; P…	YGGNDsDEDEEKK	S6 Phospho	0.99	18.65	97.72	1	45.12	27.51	2	1564.56	522.528	3	0.00452	2.89	352	364
AT5G39570.1	| Symbols: | FUNCTIONS IN: molecular_function unknown; INVOLVED IN: biological_process unknown; LOCATED IN: cytosol, nucleus; EXPRESSED IN: 25 plant structures; EXPRESSED DURING: 14 growth stages; BEST Arabidopsis thaliana protein match is: glycine-rich protein (TAIR:AT3G29075.1); Has 30201 Blast hits to 17322 proteins in 780 species: Archae - 12; Bacteria - 1396; Metazoa - 17338; Fungi - 3422; P…	SGSGDDEEGsYGR	S10 Phospho	1	27.96	237.22	1	82.16	25	2	1394.47	698.241	2	0.00535	3.83	337	349
AT5G39570.1	| Symbols: | FUNCTIONS IN: molecular_function unknown; INVOLVED IN: biological_process unknown; LOCATED IN: cytosol, nucleus; EXPRESSED IN: 25 plant structures; EXPRESSED DURING: 14 growth stages; BEST Arabidopsis thaliana protein match is: glycine-rich protein (TAIR:AT3G29075.1); Has 30201 Blast hits to 17322 proteins in 780 species: Archae - 12; Bacteria - 1396; Metazoa - 17338; Fungi - 3422; P…	TETESEYGsGGGGR	S9 Phospho	0.99	23.2	173.48	1	46.52	26.67	2	1465.54	733.778	2	0.00575	3.92	152	165
AT5G39570.1	| Symbols: | FUNCTIONS IN: molecular_function unknown; INVOLVED IN: biological_process unknown; LOCATED IN: cytosol, nucleus; EXPRESSED IN: 25 plant structures; EXPRESSED DURING: 14 growth stages; BEST Arabidopsis thaliana protein match is: glycine-rich protein (TAIR:AT3G29075.1); Has 30201 Blast hits to 17322 proteins in 780 species: Archae - 12; Bacteria - 1396; Metazoa - 17338; Fungi - 3422; P…	KYGGNDsDEDEEK	S7 Phospho	1	100.67	309.29	1	62.21	27.51	2	1564.56	783.288	2	0.00429	2.74	351	363
AT5G39570.1	| Symbols: | FUNCTIONS IN: molecular_function unknown; INVOLVED IN: biological_process unknown; LOCATED IN: cytosol, nucleus; EXPRESSED IN: 25 plant structures; EXPRESSED DURING: 14 growth stages; BEST Arabidopsis thaliana protein match is: glycine-rich protein (TAIR:AT3G29075.1); Has 30201 Blast hits to 17322 proteins in 780 species: Archae - 12; Bacteria - 1396; Metazoa - 17338; Fungi - 3422; P…	YGGNDsDEDEEK	S6 Phospho	1	217.14	307.68	0.9994	104.4	25	2	1436.47	719.241	2	0.00463	3.22	352	363
AT5G39570.1	| Symbols: | FUNCTIONS IN: molecular_function unknown; INVOLVED IN: biological_process unknown; LOCATED IN: cytosol, nucleus; EXPRESSED IN: 25 plant structures; EXPRESSED DURING: 14 growth stages; BEST Arabidopsis thaliana protein match is: glycine-rich protein (TAIR:AT3G29075.1); Has 30201 Blast hits to 17322 proteins in 780 species: Archae - 12; Bacteria - 1396; Metazoa - 17338; Fungi - 3422; P…	TETEsEYGSGGGGR	S5 Phospho	0.95	17.2	129.19	1	47.95	26.71	2	2198.3	733.775	3	733	-103	152	165
AT5G39570.1	| Symbols: | FUNCTIONS IN: molecular_function unknown; INVOLVED IN: biological_process unknown; LOCATED IN: cytosol, nucleus; EXPRESSED IN: 25 plant structures; EXPRESSED DURING: 14 growth stages; BEST Arabidopsis thaliana protein match is: glycine-rich protein (TAIR:AT3G29075.1); Has 30201 Blast hits to 17322 proteins in 780 species: Archae - 12; Bacteria - 1396; Metazoa - 17338; Fungi - 3422; P…	SGsGDDEEGSYGRK	S3 Phospho	0.99	20.77	145.27	0.9935	35.1	27.17	2	1522.56	762.286	2	0.000628	0.412	337	350
AT5G39570.1	| Symbols: | FUNCTIONS IN: molecular_function unknown; INVOLVED IN: biological_process unknown; LOCATED IN: cytosol, nucleus; EXPRESSED IN: 25 plant structures; EXPRESSED DURING: 14 growth stages; BEST Arabidopsis thaliana protein match is: glycine-rich protein (TAIR:AT3G29075.1); Has 30201 Blast hits to 17322 proteins in 780 species: Archae - 12; Bacteria - 1396; Metazoa - 17338; Fungi - 3422; P…	sEEQEEGSYR	S1 Phospho	1	83.4	104.95	0.9993	25.69	25.77	2	1292.46	647.237	2	0.00319	2.46	307	316
AT5G39570.1	| Symbols: | FUNCTIONS IN: molecular_function unknown; INVOLVED IN: biological_process unknown; LOCATED IN: cytosol, nucleus; EXPRESSED IN: 25 plant structures; EXPRESSED DURING: 14 growth stages; BEST Arabidopsis thaliana protein match is: glycine-rich protein (TAIR:AT3G29075.1); Has 30201 Blast hits to 17322 proteins in 780 species: Archae - 12; Bacteria - 1396; Metazoa - 17338; Fungi - 3422; P…	RPEsGLGSGYGGR	S4 Phospho	1	24.95	77.32	0.9377	7.97	30.11	2	1371.6	686.806	2	0.00395	2.88	173	185
AT5G39570.1	| Symbols: | FUNCTIONS IN: molecular_function unknown; INVOLVED IN: biological_process unknown; LOCATED IN: cytosol, nucleus; EXPRESSED IN: 25 plant structures; EXPRESSED DURING: 14 growth stages; BEST Arabidopsis thaliana protein match is: glycine-rich protein (TAIR:AT3G29075.1); Has 30201 Blast hits to 17322 proteins in 780 species: Archae - 12; Bacteria - 1396; Metazoa - 17338; Fungi - 3422; P…	SEEQEEGsYRKPSYGR	S8 Phospho	0.98	20.98	111.3	0.9989	30.42	31.52	2	1980.83	661.284	3	0.00795	4.01	260	275
AT5G39570.1	| Symbols: | FUNCTIONS IN: molecular_function unknown; INVOLVED IN: biological_process unknown; LOCATED IN: cytosol, nucleus; EXPRESSED IN: 25 plant structures; EXPRESSED DURING: 14 growth stages; BEST Arabidopsis thaliana protein match is: glycine-rich protein (TAIR:AT3G29075.1); Has 30201 Blast hits to 17322 proteins in 780 species: Archae - 12; Bacteria - 1396; Metazoa - 17338; Fungi - 3422; P…	SGSGDDEEGsYGRK	S10 Phospho	1	22.53	70.15	1	32.8	27.28	2	1522.56	762.288	2	0.00337	2.21	337	350
AT4G15545.1	| Symbols: | unknown protein; BEST Arabidopsis thaliana protein match is: unknown protein (TAIR:AT1G16520.1); Has 30201 Blast hits to 17322 proteins in 780 species: Archae - 12; Bacteria - 1396; Metazoa - 17338; Fungi - 3422; Plants - 5037; Viruses - 0; Other Eukaryotes - 2996 (source: NCBI BLink). | chr4:8875932-8877567 FORWARD LENGTH=337	LTPPGsPPILSASGTPK	S6 Phospho	1	36.63	143.55	0.9992	52.29	30.32	2	1698.87	850.441	2	0.00707	4.16	212	228
AT4G15545.1	| Symbols: | unknown protein; BEST Arabidopsis thaliana protein match is: unknown protein (TAIR:AT1G16520.1); Has 30201 Blast hits to 17322 proteins in 780 species: Archae - 12; Bacteria - 1396; Metazoa - 17338; Fungi - 3422; Plants - 5037; Viruses - 0; Other Eukaryotes - 2996 (source: NCBI BLink). | chr4:8875932-8877567 FORWARD LENGTH=337	TTSRPIsPR	S7 Phospho	1	66.42	106.66	0.9988	27.99	29.18	2	1093.53	547.773	2	0.00297	2.71	229	237
AT4G15545.1	| Symbols: | unknown protein; BEST Arabidopsis thaliana protein match is: unknown protein (TAIR:AT1G16520.1); Has 30201 Blast hits to 17322 proteins in 780 species: Archae - 12; Bacteria - 1396; Metazoa - 17338; Fungi - 3422; Plants - 5037; Viruses - 0; Other Eukaryotes - 2996 (source: NCBI BLink). | chr4:8875932-8877567 FORWARD LENGTH=337	SSISIsEPGSQTAR	S6 Phospho	1	27.28	153.1	0.9969	36.91	30.81	2	1498.67	750.342	2	0.00269	1.79	255	268
AT4G15545.1	| Symbols: | unknown protein; BEST Arabidopsis thaliana protein match is: unknown protein (TAIR:AT1G16520.1); Has 30201 Blast hits to 17322 proteins in 780 species: Archae - 12; Bacteria - 1396; Metazoa - 17338; Fungi - 3422; Plants - 5037; Viruses - 0; Other Eukaryotes - 2996 (source: NCBI BLink). | chr4:8875932-8877567 FORWARD LENGTH=337	HSVsFATTR	S4 Phospho	1	38.17	68.65	0.9588	12.58	28.83	2	1084.47	543.245	2	0.00439	4.04	239	247
AT4G15545.1	| Symbols: | unknown protein; BEST Arabidopsis thaliana protein match is: unknown protein (TAIR:AT1G16520.1); Has 30201 Blast hits to 17322 proteins in 780 species: Archae - 12; Bacteria - 1396; Metazoa - 17338; Fungi - 3422; Plants - 5037; Viruses - 0; Other Eukaryotes - 2996 (source: NCBI BLink). | chr4:8875932-8877567 FORWARD LENGTH=337	SsISISEPGSQTAR	S2 Phospho	0	0	136.72	0.9962	27.69	30.86	2	1498.67	750.343	2	0.00491	3.27	255	268
AT2G37340.2	| Symbols: RSZ33, RS2Z33, AT-RS2Z33 | arginine/serine-rich zinc knuckle-containing protein 33 | chr2:15670372-15671477 REVERSE LENGTH=260	NSVVsPVVGAGGDSSK	S5 Phospho	1	112.12	190.72	1	36.82	31.34	2	1538.7	770.359	2	0.00499	3.24	222	237
AT2G37340.2	| Symbols: RSZ33, RS2Z33, AT-RS2Z33 | arginine/serine-rich zinc knuckle-containing protein 33 | chr2:15670372-15671477 REVERSE LENGTH=260	sPVDDDYEPNR	S1 Phospho	1	156.18	190.81	1	56.75	27.96	2	1385.52	693.768	2	0.00683	4.92	241	251
AT2G37340.2	| Symbols: RSZ33, RS2Z33, AT-RS2Z33 | arginine/serine-rich zinc knuckle-containing protein 33 | chr2:15670372-15671477 REVERSE LENGTH=260	EDRsPVDDDYEPNR	S4 Phospho	1	182.67	217.01	1	42.78	29.37	2	1785.69	893.853	2	0.00787	4.4	238	251
AT2G37340.2	| Symbols: RSZ33, RS2Z33, AT-RS2Z33 | arginine/serine-rich zinc knuckle-containing protein 33 | chr2:15670372-15671477 REVERSE LENGTH=260	DRsPVLDDEGSPK	S3 Phospho	1	189.25	196.71	0.9978	20.57	30.38	2	1493.65	747.832	2	0.00991	6.63	179	191
AT2G37340.2	| Symbols: RSZ33, RS2Z33, AT-RS2Z33 | arginine/serine-rich zinc knuckle-containing protein 33 | chr2:15670372-15671477 REVERSE LENGTH=260	IIDGSPPPsPK	S9 Phospho	1	39.54	114.07	0.9353	7.81	29.68	2	1186.57	594.292	2	0.00605	5.09	192	202
AT2G37340.2	| Symbols: RSZ33, RS2Z33, AT-RS2Z33 | arginine/serine-rich zinc knuckle-containing protein 33 | chr2:15670372-15671477 REVERSE LENGTH=260	NSVVsPVVGAGGDSSKEDR	S5 Phospho	1	58.97	146.63	0.9948	19.87	31.97	2	1938.88	970.446	2	0.00871	4.49	222	240
AT3G55460.1	| Symbols: SCL30, At-SCL30 | SC35-like splicing factor 30 | chr3:20561024-20563502 FORWARD LENGTH=262	sPPPPPPR	S1 Phospho	1	1000	67.52	0.99	15.65	28.61	2	923.43	462.722	2	0.00355	3.84	22	29
AT3G55460.1	| Symbols: SCL30, At-SCL30 | SC35-like splicing factor 30 | chr3:20561024-20563502 FORWARD LENGTH=262	GRsPPPPPPR	S3 Phospho	1	1000	174.14	1	56.19	29.58	2	1136.55	569.284	2	0.00449	3.95	20	29
AT3G55460.1	| Symbols: SCL30, At-SCL30 | SC35-like splicing factor 30 | chr3:20561024-20563502 FORWARD LENGTH=262	GEEDENYsR	S8 Phospho	0.5	0	63.88	1	40.97	25	2	1177.39	589.704	2	0.00165	1.4	194	202
AT3G55460.1	| Symbols: SCL30, At-SCL30 | SC35-like splicing factor 30 | chr3:20561024-20563502 FORWARD LENGTH=262	SYsPGYEGAAAAAPDR	S3 Phospho	1	27.96	302.48	0.9972	108.3	29.91	2	1661.68	831.847	2	0.00687	4.13	204	219
AT3G55460.1	| Symbols: SCL30, At-SCL30 | SC35-like splicing factor 30 | chr3:20561024-20563502 FORWARD LENGTH=262	SRsVEVSPR	S3 Phospho	0.99	20.19	130.54	0.9979	23.73	29.61	2	1095.51	548.763	2	0.00495	4.51	254	262
AT4G39680.1	| Symbols: | SAP domain-containing protein | chr4:18414604-18416938 REVERSE LENGTH=633	VPEAQITNSATPTTtPR	T15 Phospho	0.99	22.52	300.3	0.9913	50.52	31.52	2	1862.88	932.445	2	-0.00177	-0.951	407	423
AT4G39680.1	| Symbols: | SAP domain-containing protein | chr4:18414604-18416938 REVERSE LENGTH=633	SDsSVSEDGPK	S3 Phospho	1	53.98	157.07	1	61.13	26.33	2	1186.44	594.228	2	0.00315	2.65	434	444
AT4G39680.1	| Symbols: | SAP domain-containing protein | chr4:18414604-18416938 REVERSE LENGTH=633	VPEAQITNSAtPTTTPR	T11 Phospho	0.99	24.95	216.92	0.9985	32.84	31.38	2	1862.89	932.451	2	0.00991	5.32	407	423
AT4G39680.1	| Symbols: | SAP domain-containing protein | chr4:18414604-18416938 REVERSE LENGTH=633	DAAVVQVAsSEHK	S9 Phospho	1	26.2	278.07	0.9978	46.21	30.62	2	1419.65	710.831	2	0.00871	6.13	169	181
AT4G39680.1	| Symbols: | SAP domain-containing protein | chr4:18414604-18416938 REVERSE LENGTH=633	DAAVVQVASsEHK	S10 Phospho	1	23.98	262.59	0.9989	34.21	30.73	2	1419.65	710.83	2	0.00575	4.05	169	181
AT4G39680.1	| Symbols: | SAP domain-containing protein | chr4:18414604-18416938 REVERSE LENGTH=633	SDSSVsEDGPK	S6 Phospho	1	67.3	172.7	1	65.32	26.33	2	1186.44	594.228	2	0.00311	2.62	434	444
AT4G39680.1	| Symbols: | SAP domain-containing protein | chr4:18414604-18416938 REVERSE LENGTH=633	QSESITsDDK	S7 Phospho	0.01	0	80.48	0.9986	31.12	27.36	2	1188.46	595.237	2	0.00375	3.15	333	342
AT4G39680.1	| Symbols: | SAP domain-containing protein | chr4:18414604-18416938 REVERSE LENGTH=633	SDSsVSEDGPKER	S4 Phospho	0	0	104.98	0.9892	24.92	29.11	2	1471.6	736.805	2	0.0132	8.98	434	446
AT4G39680.1	| Symbols: | SAP domain-containing protein | chr4:18414604-18416938 REVERSE LENGTH=633	NQTTPVTPVEAAFSTETTPVTAEKtPEPTQTK	T25 Phospho	0.14	0	54.66	0.9603	15.16	32.99	2	3480.67	1161.23	3	0.0153	4.39	84	115
AT4G39680.1	| Symbols: | SAP domain-containing protein | chr4:18414604-18416938 REVERSE LENGTH=633	QSESITsDDKSAK	S7 Phospho	0.49	0	146.15	0.9966	28.8	30.11	2	1474.62	738.319	2	0.00529	3.58	333	345
AT4G39680.1	| Symbols: | SAP domain-containing protein | chr4:18414604-18416938 REVERSE LENGTH=633	QSESItSDDK	T6 Phospho	0.98	21.43	62.73	0.9292	13.31	27.51	2	1188.46	595.238	2	0.00693	5.82	333	342
AT4G39680.1	| Symbols: | SAP domain-containing protein | chr4:18414604-18416938 REVERSE LENGTH=633	SDSSVsEDGPKER	S6 Phospho	1	47.95	113.47	0.999	34.39	29.19	2	1471.59	736.802	2	0.00629	4.27	434	446
AT4G39680.1	| Symbols: | SAP domain-containing protein | chr4:18414604-18416938 REVERSE LENGTH=633	NQTTPVTPVEAAFStETTPVTAEKTPEPTQTK	T15 Phospho	0.17	0	116.36	0.9676	16.36	32.95	2	3480.67	1161.23	3	0.0171	4.9	84	115
AT2G46630.1	| Symbols: | unknown protein; LOCATED IN: chloroplast; EXPRESSED IN: 22 plant structures; EXPRESSED DURING: 13 growth stages; Has 110095 Blast hits to 59224 proteins in 2216 species: Archae - 177; Bacteria - 15429; Metazoa - 38345; Fungi - 18843; Plants - 13341; Viruses - 3084; Other Eukaryotes - 20876 (source: NCBI BLink). | chr2:19145529-19146713 FORWARD LENGTH=394	QQQQPLtPPR	T7 Phospho	1	1000	163.33	0.9996	30.91	30.17	2	1271.61	636.811	2	0.00493	3.87	69	78
AT2G46630.1	| Symbols: | unknown protein; LOCATED IN: chloroplast; EXPRESSED IN: 22 plant structures; EXPRESSED DURING: 13 growth stages; Has 110095 Blast hits to 59224 proteins in 2216 species: Archae - 177; Bacteria - 15429; Metazoa - 38345; Fungi - 18843; Plants - 13341; Viruses - 3084; Other Eukaryotes - 20876 (source: NCBI BLink). | chr2:19145529-19146713 FORWARD LENGTH=394	QQDPPsPPR	S6 Phospho	1	1000	65.9	0.9985	13.58	28.65	2	1100.47	551.242	2	0.00491	4.46	60	68
AT2G46630.1	| Symbols: | unknown protein; LOCATED IN: chloroplast; EXPRESSED IN: 22 plant structures; EXPRESSED DURING: 13 growth stages; Has 110095 Blast hits to 59224 proteins in 2216 species: Archae - 177; Bacteria - 15429; Metazoa - 38345; Fungi - 18843; Plants - 13341; Viruses - 3084; Other Eukaryotes - 20876 (source: NCBI BLink). | chr2:19145529-19146713 FORWARD LENGTH=394	APPTsPPQER	S5 Phospho	1	23.98	83.13	0.9398	10.96	29.9	2	1158.51	580.263	2	0.00405	3.49	81	90
AT2G46630.1	| Symbols: | unknown protein; LOCATED IN: chloroplast; EXPRESSED IN: 22 plant structures; EXPRESSED DURING: 13 growth stages; Has 110095 Blast hits to 59224 proteins in 2216 species: Archae - 177; Bacteria - 15429; Metazoa - 38345; Fungi - 18843; Plants - 13341; Viruses - 3084; Other Eukaryotes - 20876 (source: NCBI BLink). | chr2:19145529-19146713 FORWARD LENGTH=394	AAtPPPPPPR	T3 Phospho	1	1000	107.39	0.9962	23.72	29.19	2	1079.52	540.768	2	0.00377	3.49	109	118
ATCG00710.1	| Symbols: PSBH | photosystem II reaction center protein H | chrC:74485-74706 FORWARD LENGTH=73	AtQTVEDSSR	T2 Phospho	1	27.96	109.76	1	45.13	28.08	1	1172.47	587.245	2	0.00383	3.26	2	11
ATCG00710.1	| Symbols: PSBH | photosystem II reaction center protein H | chrC:74485-74706 FORWARD LENGTH=73	ATQtVEDSSR	T4 Phospho	0	0	115.1	0.998	43.62	27.94	1	1172.47	587.244	2	0.00223	1.9	2	11
AT1G16610.1	| Symbols: SR45, RNPS1 | arginine/serine-rich 45 | chr1:5675925-5678686 REVERSE LENGTH=414	VSsPPKPVSAAPK	S3 Phospho	0.5	0	172.75	0.9982	42.89	29.7	2	1343.69	672.851	2	0.00281	2.09	181	193
AT1G16610.1	| Symbols: SR45, RNPS1 | arginine/serine-rich 45 | chr1:5675925-5678686 REVERSE LENGTH=414	GRsPPPPPSK	S3 Phospho	1	145.62	145.15	0.9988	21.9	29.14	2	1098.53	550.27	2	0.00283	2.57	75	84
AT1G16610.1	| Symbols: SR45, RNPS1 | arginine/serine-rich 45 | chr1:5675925-5678686 REVERSE LENGTH=414	RGRsPPPPPSK	S4 Phospho	1	60.5	58.8	0.9985	15.59	29.68	2	1254.63	628.32	2	0.00263	2.09	74	84
AT1G16610.1	| Symbols: SR45, RNPS1 | arginine/serine-rich 45 | chr1:5675925-5678686 REVERSE LENGTH=414	RDAPKsDNAAADAEK	S6 Phospho	1	1000	111.72	0.9893	16.23	30.55	2	1637.7	546.909	3	-0.000618	-0.377	194	208
AT2G27710.3	| Symbols: | 60S acidic ribosomal protein family | chr2:11816929-11817670 FORWARD LENGTH=115	LASVPSGGGGGVAVASATSGGGGGGGAsAAESK	S28 Phospho	1	31.7	118.27	0.9451	8.67	32.93	2	2667.22	890.082	3	0.00873	3.27	62	94
AT2G27710.3	| Symbols: | 60S acidic ribosomal protein family | chr2:11816929-11817670 FORWARD LENGTH=115	KEEKEEsDDDMGFSLFE	S7 Phospho	0.97	14.81	67.23	0.9716	11.78	30.03	2	2113.82	705.613	3	0.00973	4.6	99	115
AT2G27710.3	| Symbols: | 60S acidic ribosomal protein family | chr2:11816929-11817670 FORWARD LENGTH=115	LASVPSGGGGGVAVASATsGGGGGGGASAAESK	S19 Phospho	0.97	20.98	225.45	0.9966	53.2	32.98	2	2667.22	890.079	3	0.00165	0.619	62	94
AT2G27720.2	| Symbols: | 60S acidic ribosomal protein family | chr2:11818696-11819370 FORWARD LENGTH=130	LASVPSGGGGGVAVASATsGGGGGGGAPAAESK	S19 Phospho	0.2	0	217.67	0.9978	45.54	32.91	2	2677.24	893.422	3	0.00856	3.2	77	109
AT5G25780.1	| Symbols: EIF3B-2, EIF3B, ATEIF3B-2 | eukaryotic translation initiation factor 3B-2 | chr5:8973420-8976758 REVERSE LENGTH=714	DGEVsDVEEDEYEAK	S5 Phospho	1	160.4	241.36	1	55.21	28.61	2	1792.67	897.341	2	0.0109	6.07	681	695
AT5G25780.1	| Symbols: EIF3B-2, EIF3B, ATEIF3B-2 | eukaryotic translation initiation factor 3B-2 | chr5:8973420-8976758 REVERSE LENGTH=714	YLVTYHSQEPsNPR	S11 Phospho	1	36.38	60.81	0.9989	22.73	31.59	2	1769.78	885.899	2	0.00513	2.9	264	277
AT2G27100.1	| Symbols: SE | C2H2 zinc-finger protein SERRATE (SE) | chr2:11572587-11576357 FORWARD LENGTH=720	TSEPNsEDEAAGVGK	S6 Phospho	0.99	23.99	188.57	0.9982	68.67	29.42	2	1569.63	785.821	2	0.00867	5.52	294	308
AT2G27100.1	| Symbols: SE | C2H2 zinc-finger protein SERRATE (SE) | chr2:11572587-11576357 FORWARD LENGTH=720	DRsPLPPPR	S3 Phospho	1	1000	168.65	1	41.72	29.11	2	1113.54	557.776	2	0.00497	4.46	74	82
AT2G27100.1	| Symbols: SE | C2H2 zinc-finger protein SERRATE (SE) | chr2:11572587-11576357 FORWARD LENGTH=720	TsEPNSEDEAAGVGK	S2 Phospho	0.5	0	251.47	0.9986	83.92	29.32	2	1569.63	785.82	2	0.00539	3.43	294	308
AT2G27100.1	| Symbols: SE | C2H2 zinc-finger protein SERRATE (SE) | chr2:11572587-11576357 FORWARD LENGTH=720	STSSsPPPPPPSSSLPQQEQEQDQQQLPLR	S5 Phospho	0.15	0	206.45	0.9972	63.25	33.35	2	3349.55	1117.53	3	0.00787	2.35	20	49
AT2G27100.1	| Symbols: SE | C2H2 zinc-finger protein SERRATE (SE) | chr2:11572587-11576357 FORWARD LENGTH=720	SGRTsEPNSEDEAAGVGK	S5 Phospho	0.33	0	138.75	0.9929	23.33	31.41	2	1869.78	935.896	2	0.00377	2.01	291	308
AT2G27100.1	| Symbols: SE | C2H2 zinc-finger protein SERRATE (SE) | chr2:11572587-11576357 FORWARD LENGTH=720	GGPAPFLLsPAFR	S9 Phospho	1	1000	101.6	0.9898	17.69	30.72	2	1408.7	705.359	2	0.0128	9.11	681	693
AT5G52040.1	| Symbols: ATRSP41, RS41, At-RS41 | RNA-binding (RRM/RBD/RNP motifs) family protein | chr5:21131081-21133318 FORWARD LENGTH=356	ERTsPDYGR	S4 Phospho	0.5	0	76.16	0.9606	14.57	27.79	2	1159.47	387.497	3	0.00251	2.16	217	225
AT5G52040.1	| Symbols: ATRSP41, RS41, At-RS41 | RNA-binding (RRM/RBD/RNP motifs) family protein | chr5:21131081-21133318 FORWARD LENGTH=356	VAsPENGAVR	S3 Phospho	1	1000	169.79	1	37.17	28.57	2	1078.48	540.249	2	0.00195	1.8	252	261
AT5G52040.1	| Symbols: ATRSP41, RS41, At-RS41 | RNA-binding (RRM/RBD/RNP motifs) family protein | chr5:21131081-21133318 FORWARD LENGTH=356	GNGYsPER	S5 Phospho	1	27.96	65.37	0.99	24.03	29.64	2	958.357	480.186	2	0.00249	2.59	173	180
AT5G52040.1	| Symbols: ATRSP41, RS41, At-RS41 | RNA-binding (RRM/RBD/RNP motifs) family protein | chr5:21131081-21133318 FORWARD LENGTH=356	ERGsPDYGR	S4 Phospho	1	56.2	53.92	0.9972	15.28	27.13	2	1115.44	558.729	2	0.00317	2.84	199	207
AT5G52040.1	| Symbols: ATRSP41, RS41, At-RS41 | RNA-binding (RRM/RBD/RNP motifs) family protein | chr5:21131081-21133318 FORWARD LENGTH=356	ARLsPDYK	S4 Phospho	1	83.64	165.19	0.99	28.11	29.04	2	1028.47	515.245	2	0.00527	5.12	236	243
AT5G52040.1	| Symbols: ATRSP41, RS41, At-RS41 | RNA-binding (RRM/RBD/RNP motifs) family protein | chr5:21131081-21133318 FORWARD LENGTH=356	GYDGADsPIR	S7 Phospho	1	152.04	180.55	1	32.96	27.77	2	1129.45	565.731	2	0.00391	3.46	336	345
AT5G52040.1	| Symbols: ATRSP41, RS41, At-RS41 | RNA-binding (RRM/RBD/RNP motifs) family protein | chr5:21131081-21133318 FORWARD LENGTH=356	ERtSPDYGR	T3 Phospho	0.5	0	122.66	0.9821	25.6	27.14	2	1159.47	387.496	3	-7.94e-06	-0.00684	217	225
AT4G31580.2	| Symbols: SRZ-22, SRZ22, RSZP22, RSZ22, At-RSZ22 | serine/arginine-rich 22 | chr4:15306983-15308064 FORWARD LENGTH=200	ARsPPPPR	S3 Phospho	1	1000	56.75	0.9257	7.43	28	2	956.462	479.238	2	0.00211	2.2	150	157
AT1G19870.1	| Symbols: iqd32 | IQ-domain 32 | chr1:6895400-6898539 REVERSE LENGTH=794	SsPDLQER	S2 Phospho	0.5	0	141.62	0.99	26.96	26.99	2	1010.41	506.213	2	0.00345	3.41	745	752
AT1G19870.1	| Symbols: iqd32 | IQ-domain 32 | chr1:6895400-6898539 REVERSE LENGTH=794	KVsNPSFIAAQSK	S3 Phospho	1	96.21	361.08	1	76.57	29.95	2	1455.72	728.866	2	0.00593	4.07	457	469
AT1G19870.1	| Symbols: iqd32 | IQ-domain 32 | chr1:6895400-6898539 REVERSE LENGTH=794	VEPEEsESDDVIIVR	S6 Phospho	1	54.16	151.88	1	53.26	31.47	2	1794.8	898.409	2	0.01	5.58	188	202
AT1G19870.1	| Symbols: iqd32 | IQ-domain 32 | chr1:6895400-6898539 REVERSE LENGTH=794	RTsFGYDQEAR	S3 Phospho	0.99	21.95	104.3	0.9771	16.04	29.48	2	1408.58	705.297	2	0.00265	1.88	704	714
AT1G19870.1	| Symbols: iqd32 | IQ-domain 32 | chr1:6895400-6898539 REVERSE LENGTH=794	FEELTSSTGsNK	S10 Phospho	0.2	0	105.56	0.9974	18.57	29.36	2	1378.57	690.294	2	0.00813	5.89	470	481
AT1G19870.1	| Symbols: iqd32 | IQ-domain 32 | chr1:6895400-6898539 REVERSE LENGTH=794	SPsPDNNNVSEK	S3 Phospho	1	47.63	264.82	1	62.71	28.62	2	1366.54	684.279	2	0.00373	2.73	78	89
AT1G19870.1	| Symbols: iqd32 | IQ-domain 32 | chr1:6895400-6898539 REVERSE LENGTH=794	QQQsFSVDEK	S4 Phospho	1	50.64	164.07	1	54.01	28.41	2	1274.52	638.269	2	0.00437	3.42	90	99
AT1G19870.1	| Symbols: iqd32 | IQ-domain 32 | chr1:6895400-6898539 REVERSE LENGTH=794	TEVsPVIVESK	S4 Phospho	1	84.18	193.09	1	40.05	30.51	2	1266.62	634.316	2	0.00575	4.53	139	149
AT1G19870.1	| Symbols: iqd32 | IQ-domain 32 | chr1:6895400-6898539 REVERSE LENGTH=794	TDIDsPDTTNTIK	S5 Phospho	1	26.2	110.06	0.9299	10.62	29.8	2	1499.65	750.833	2	0.0109	7.27	498	510
AT1G19870.1	| Symbols: iqd32 | IQ-domain 32 | chr1:6895400-6898539 REVERSE LENGTH=794	VEGQNVELSEtEK	T11 Phospho	0	0	185.01	0.9872	31.3	30.71	2	1540.68	771.345	2	0.0104	6.78	397	409
AT1G19870.1	| Symbols: iqd32 | IQ-domain 32 | chr1:6895400-6898539 REVERSE LENGTH=794	TsFGYDQEAR	S2 Phospho	0.5	0	121.75	0.9955	27.99	28.18	2	1252.48	627.249	2	0.00633	5.05	705	714
AT1G19870.1	| Symbols: iqd32 | IQ-domain 32 | chr1:6895400-6898539 REVERSE LENGTH=794	sSPDLQER	S1 Phospho	1	27.96	100.61	0.987	21.24	26.87	2	1010.42	506.215	2	0.00815	8.06	745	752
AT1G19870.1	| Symbols: iqd32 | IQ-domain 32 | chr1:6895400-6898539 REVERSE LENGTH=794	VEGQNVELsETEK	S9 Phospho	1	42.13	218.13	0.9982	33.72	30.74	2	1540.67	771.344	2	0.00707	4.58	397	409
AT2G20960.1	| Symbols: pEARLI4 | Arabidopsis phospholipase-like protein (PEARLI 4) family | chr2:9007089-9009611 FORWARD LENGTH=748	RPQtPETRPR	T4 Phospho	1	43.77	99.92	0.9981	20.91	29.72	2	1316.64	439.886	3	0.00226	1.72	215	224
AT2G20960.1	| Symbols: pEARLI4 | Arabidopsis phospholipase-like protein (PEARLI 4) family | chr2:9007089-9009611 FORWARD LENGTH=748	sPLASYFAK	S1 Phospho	1	105.44	104.66	0.9988	21.71	28.74	2	1062.49	532.25	2	0.00695	6.53	66	74
AT2G20960.1	| Symbols: pEARLI4 | Arabidopsis phospholipase-like protein (PEARLI 4) family | chr2:9007089-9009611 FORWARD LENGTH=748	SKtPEPQPTYFEPSSR	T3 Phospho	1	23.2	220.85	0.9984	42.9	31.68	2	1929.86	644.293	3	0.00748	3.87	314	329
AT2G20960.1	| Symbols: pEARLI4 | Arabidopsis phospholipase-like protein (PEARLI 4) family | chr2:9007089-9009611 FORWARD LENGTH=748	DQTPPAsPAR	S7 Phospho	1	66.42	126.17	0.9972	23.05	28.96	2	1118.48	560.246	2	0.000668	0.597	53	62
AT2G20960.1	| Symbols: pEARLI4 | Arabidopsis phospholipase-like protein (PEARLI 4) family | chr2:9007089-9009611 FORWARD LENGTH=748	tPIHESAATGR	T1 Phospho	1	112.7	87.53	0.9986	21.75	29.72	2	1218.55	610.28	2	0.00611	5.01	204	214
AT2G20960.1	| Symbols: pEARLI4 | Arabidopsis phospholipase-like protein (PEARLI 4) family | chr2:9007089-9009611 FORWARD LENGTH=748	tPIHESAATER	T1 Phospho	1	100.67	92.94	0.9995	26.77	30.52	2	1290.56	646.29	2	0.00403	3.12	239	249
AT2G20960.1	| Symbols: pEARLI4 | Arabidopsis phospholipase-like protein (PEARLI 4) family | chr2:9007089-9009611 FORWARD LENGTH=748	DQtPPASPAR	T3 Phospho	1	122.33	174.15	1	37.67	29.23	2	1118.48	560.248	2	0.00481	4.29	53	62
AT1G01320.2	| Symbols: | Tetratricopeptide repeat (TPR)-like superfamily protein | chr1:121582-130099 REVERSE LENGTH=1787	QSDTsPPPSPASK	S5 Phospho	1	27.96	227.53	0.9995	61.53	30.06	2	1377.59	689.8	2	0.00453	3.28	145	157
AT1G01320.2	| Symbols: | Tetratricopeptide repeat (TPR)-like superfamily protein | chr1:121582-130099 REVERSE LENGTH=1787	TAGETsEEDGLK	S6 Phospho	1	24.95	213.64	0.999	63.98	27.91	2	1315.52	658.769	2	0.00531	4.03	1344	1355
AT1G01320.2	| Symbols: | Tetratricopeptide repeat (TPR)-like superfamily protein | chr1:121582-130099 REVERSE LENGTH=1787	SPsYKEVALAPPGSIAK	S3 Phospho	0.5	0	281.21	0.9983	56.4	30.76	2	1793.9	897.958	2	0.00465	2.59	1387	1403
AT1G01320.2	| Symbols: | Tetratricopeptide repeat (TPR)-like superfamily protein | chr1:121582-130099 REVERSE LENGTH=1787	QSDtSPPPSPASK	T4 Phospho	0.33	0	102.51	0.9955	21.47	30.02	2	1377.59	689.801	2	0.00651	4.72	145	157
AT1G01320.2	| Symbols: | Tetratricopeptide repeat (TPR)-like superfamily protein | chr1:121582-130099 REVERSE LENGTH=1787	SPSyKEVALAPPGSIAK	Y4 Phospho	0.01	0	137.78	0.9769	17.51	30.7	2	1793.91	598.976	3	0.0105	5.83	1387	1403
AT4G02510.1	| Symbols: TOC159, TOC86, PPI2, TOC160, ATTOC159 | translocon at the outer envelope membrane of chloroplasts 159 | chr4:1104766-1109360 FORWARD LENGTH=1503	VGADDLsDSEK	S7 Phospho	1	54.16	300.7	1	85.09	27.72	2	1214.48	608.245	2	0.00569	4.68	65	75
AT4G02510.1	| Symbols: TOC159, TOC86, PPI2, TOC160, ATTOC159 | translocon at the outer envelope membrane of chloroplasts 159 | chr4:1104766-1109360 FORWARD LENGTH=1503	VVEGDsAEEDENKLPVEDIVSSR	S6 Phospho	1	177.18	164.22	1	46.46	32.93	2	2595.17	866.065	3	0.0127	4.88	584	606
AT4G02510.1	| Symbols: TOC159, TOC86, PPI2, TOC160, ATTOC159 | translocon at the outer envelope membrane of chloroplasts 159 | chr4:1104766-1109360 FORWARD LENGTH=1503	FDQIGDDDsGEFEPVSDK	S9 Phospho	1	121.86	232.86	1	62.15	30.2	2	2078.81	1040.41	2	0.0114	5.5	273	290
AT4G02510.1	| Symbols: TOC159, TOC86, PPI2, TOC160, ATTOC159 | translocon at the outer envelope membrane of chloroplasts 159 | chr4:1104766-1109360 FORWARD LENGTH=1503	FTsESDSIADSSK	S3 Phospho	1	58.42	270.03	0.9997	69.23	29.24	2	1452.57	727.292	2	0.00405	2.78	299	311
AT4G02510.1	| Symbols: TOC159, TOC86, PPI2, TOC160, ATTOC159 | translocon at the outer envelope membrane of chloroplasts 159 | chr4:1104766-1109360 FORWARD LENGTH=1503	VGADDLsDSEKEKPNLVGDGK	S7 Phospho	1	43.29	173.63	0.9951	30.26	32.54	2	2252.03	1127.02	2	0.00425	1.89	65	85
AT4G02510.1	| Symbols: TOC159, TOC86, PPI2, TOC160, ATTOC159 | translocon at the outer envelope membrane of chloroplasts 159 | chr4:1104766-1109360 FORWARD LENGTH=1503	VVEGDsAEEDENK	S6 Phospho	1	1000	72.1	0.9996	27.02	29.01	2	1499.57	750.793	2	0.00469	3.12	584	596
AT4G02510.1	| Symbols: TOC159, TOC86, PPI2, TOC160, ATTOC159 | translocon at the outer envelope membrane of chloroplasts 159 | chr4:1104766-1109360 FORWARD LENGTH=1503	ELDSSSEAVSGNsDK	S13 Phospho	0.99	21.44	167.52	0.9985	33.18	29.01	2	1603.63	802.822	2	0.00365	2.27	50	64
AT4G02510.1	| Symbols: TOC159, TOC86, PPI2, TOC160, ATTOC159 | translocon at the outer envelope membrane of chloroplasts 159 | chr4:1104766-1109360 FORWARD LENGTH=1503	ELDSSSEAVSGNSDKVGADDLsDSEK	S22 Phospho	0.14	0	64.9	0.9991	41.18	32.67	2	2720.13	907.717	3	0.00959	3.53	50	75
AT4G02510.1	| Symbols: TOC159, TOC86, PPI2, TOC160, ATTOC159 | translocon at the outer envelope membrane of chloroplasts 159 | chr4:1104766-1109360 FORWARD LENGTH=1503	ELDsSSEAVSGNSDK	S4 Phospho	0.5	0	144.78	0.9987	41.77	29.12	2	1603.63	802.822	2	0.00475	2.96	50	64
AT4G02510.1	| Symbols: TOC159, TOC86, PPI2, TOC160, ATTOC159 | translocon at the outer envelope membrane of chloroplasts 159 | chr4:1104766-1109360 FORWARD LENGTH=1503	FTSESDsIADSSK	S7 Phospho	1	48.15	167.5	0.9989	28.41	29.22	2	1452.57	727.293	2	0.00527	3.62	299	311
AT4G02510.1	| Symbols: TOC159, TOC86, PPI2, TOC160, ATTOC159 | translocon at the outer envelope membrane of chloroplasts 159 | chr4:1104766-1109360 FORWARD LENGTH=1503	EVDQEPsGEGVTR	S7 Phospho	1	51.24	83.05	0.9984	17.01	29.89	2	1481.61	741.812	2	0.00613	4.13	614	626
AT4G02510.1	| Symbols: TOC159, TOC86, PPI2, TOC160, ATTOC159 | translocon at the outer envelope membrane of chloroplasts 159 | chr4:1104766-1109360 FORWARD LENGTH=1503	SVTPEPTNPFYASSGQsGK	S17 Phospho	0.25	0	127.55	0.9187	15.88	31.77	2	2032.88	1017.45	2	0.00165	0.81	5	23
AT4G02510.1	| Symbols: TOC159, TOC86, PPI2, TOC160, ATTOC159 | translocon at the outer envelope membrane of chloroplasts 159 | chr4:1104766-1109360 FORWARD LENGTH=1503	KVVEGDsAEEDENKLPVEDIVSSR	S7 Phospho	1	322.32	393.53	1	68.34	32.93	2	2723.26	908.761	3	0.00806	2.96	583	606
AT4G02510.1	| Symbols: TOC159, TOC86, PPI2, TOC160, ATTOC159 | translocon at the outer envelope membrane of chloroplasts 159 | chr4:1104766-1109360 FORWARD LENGTH=1503	AAtGGGSSEGGNFTITSQDGTK	T3 Phospho	0.33	0	146.26	0.9977	34.91	31.63	2	2121.9	1061.96	2	0.0101	4.78	712	733
AT4G28080.1	| Symbols: | Tetratricopeptide repeat (TPR)-like superfamily protein | chr4:13948993-13957840 REVERSE LENGTH=1819	VVVGGSELTSsPK	S11 Phospho	1	27.96	279.86	0.9995	88.16	30.59	2	1338.65	670.331	2	0.00467	3.48	1443	1455
AT4G28080.1	| Symbols: | Tetratricopeptide repeat (TPR)-like superfamily protein | chr4:13948993-13957840 REVERSE LENGTH=1819	DAGDSNSGLsPKPK	S10 Phospho	1	43.77	125.17	0.9989	19.65	30.63	2	1451.63	484.886	3	0.00528	3.64	156	169
AT4G28080.1	| Symbols: | Tetratricopeptide repeat (TPR)-like superfamily protein | chr4:13948993-13957840 REVERSE LENGTH=1819	sPNADSEQIR	S1 Phospho	1	103.68	134.61	1	49.54	28.64	2	1195.49	598.753	2	0.00479	4	543	552
AT4G28080.1	| Symbols: | Tetratricopeptide repeat (TPR)-like superfamily protein | chr4:13948993-13957840 REVERSE LENGTH=1819	TVDGETENLPNGDSsPK	S15 Phospho	0.99	21.95	366.42	0.9985	80.85	30.66	2	1838.76	920.389	2	0.00583	3.17	1529	1545
AT4G28080.1	| Symbols: | Tetratricopeptide repeat (TPR)-like superfamily protein | chr4:13948993-13957840 REVERSE LENGTH=1819	SStPSSLAQR	T3 Phospho	0.99	24.95	204.66	0.9983	39.32	29.01	2	1112.49	557.253	2	0.00601	5.4	533	542
AT4G28080.1	| Symbols: | Tetratricopeptide repeat (TPR)-like superfamily protein | chr4:13948993-13957840 REVERSE LENGTH=1819	GKPGQsPGPVSEENQK	S6 Phospho	1	97.98	124.68	0.9994	20.62	31.69	2	1717.77	573.598	3	0.00605	3.52	1169	1184
AT4G28080.1	| Symbols: | Tetratricopeptide repeat (TPR)-like superfamily protein | chr4:13948993-13957840 REVERSE LENGTH=1819	STNFTsPR	S6 Phospho	1	24.95	154.73	0.99	23.5	27.16	2	988.406	495.21	2	0.00487	4.92	1288	1295
AT4G28080.1	| Symbols: | Tetratricopeptide repeat (TPR)-like superfamily protein | chr4:13948993-13957840 REVERSE LENGTH=1819	LVKPEATVHEDDDsDEGWQEAVPK	S14 Phospho	1	43.64	128.9	0.9733	17.34	33.15	2	2773.23	925.416	3	0.014	5.06	1231	1254
AT4G13350.2	| Symbols: NIG | NSP (nuclear shuttle protein)-interacting GTPase | chr4:7770170-7773321 REVERSE LENGTH=602	sPPYEDGYDR	S1 Phospho	1	56.2	106.64	0.9995	23.97	26.47	2	1277.46	639.74	2	0.00465	3.64	143	152
AT4G13350.2	| Symbols: NIG | NSP (nuclear shuttle protein)-interacting GTPase | chr4:7770170-7773321 REVERSE LENGTH=602	sPGFETGSR	S1 Phospho	1	168.16	183.06	1	63.13	26.78	2	1016.4	509.208	2	0.00591	5.81	164	172
AT4G13350.2	| Symbols: NIG | NSP (nuclear shuttle protein)-interacting GTPase | chr4:7770170-7773321 REVERSE LENGTH=602	KTSEEGSQsPEQVK	S9 Phospho	1	66.42	131.6	0.9983	20.33	30.41	2	1612.7	538.574	3	0.00295	1.83	200	213
AT4G13350.2	| Symbols: NIG | NSP (nuclear shuttle protein)-interacting GTPase | chr4:7770170-7773321 REVERSE LENGTH=602	TSEEGSQsPEQVK	S8 Phospho	1	24.95	258.86	0.9997	69.26	29.74	2	1484.61	743.312	2	0.00573	3.86	201	213
AT4G13350.2	| Symbols: NIG | NSP (nuclear shuttle protein)-interacting GTPase | chr4:7770170-7773321 REVERSE LENGTH=602	SSPGGRsPGFETGSR	S7 Phospho	1	56.46	142.37	0.9973	27.4	30.18	2	1557.66	520.228	3	0.00489	3.14	158	172
AT5G58140.1	| Symbols: PHOT2, NPL1 | phototropin 2 | chr5:23524771-23529993 FORWARD LENGTH=915	APPsPLNDAESLSER	S4 Phospho	1	239.92	346.11	0.9975	106.8	31.33	2	1661.74	831.878	2	0.0111	6.67	6	20
AT5G58140.1	| Symbols: PHOT2, NPL1 | phototropin 2 | chr5:23524771-23529993 FORWARD LENGTH=915	QSDEASKsFR	S8 Phospho	1	43.29	163.1	0.9991	62.31	29.18	2	1233.51	617.76	2	0.00359	2.91	312	321
AT5G58140.1	| Symbols: PHOT2, NPL1 | phototropin 2 | chr5:23524771-23529993 FORWARD LENGTH=915	SLEIFNPSsGK	S9 Phospho	0.5	0	149.21	0.9956	24.16	29.92	2	1257.57	629.793	2	0.00617	4.9	22	32
AT5G58140.1	| Symbols: PHOT2, NPL1 | phototropin 2 | chr5:23524771-23529993 FORWARD LENGTH=915	SsEESTSSESGAFPR	S2 Phospho	0.5	0	290.45	0.9987	76.91	28.85	2	1636.63	819.323	2	0.00659	4.02	105	119
AT5G58140.1	| Symbols: PHOT2, NPL1 | phototropin 2 | chr5:23524771-23529993 FORWARD LENGTH=915	sLEIFNPSSGK	S1 Phospho	1	95.28	90.16	0.9538	9.51	29.92	2	1257.57	629.793	2	0.00731	5.81	22	32
AT5G58140.1	| Symbols: PHOT2, NPL1 | phototropin 2 | chr5:23524771-23529993 FORWARD LENGTH=915	DsWDLSDR	S2 Phospho	1	117.47	124.83	0.99	37.78	26.27	2	1072.39	537.202	2	0.00403	3.75	363	370
AT5G58140.1	| Symbols: PHOT2, NPL1 | phototropin 2 | chr5:23524771-23529993 FORWARD LENGTH=915	RsLEIFNPSSGK	S2 Phospho	1	209.85	164.29	0.9995	24.74	30.66	2	1413.67	707.843	2	0.00539	3.81	21	32
AT5G58140.1	| Symbols: PHOT2, NPL1 | phototropin 2 | chr5:23524771-23529993 FORWARD LENGTH=915	SSEESTSsESGAFPR	S8 Phospho	0.99	26.2	268.85	0.9989	53.51	28.84	2	1636.63	819.323	2	0.00617	3.77	105	119
AT5G58140.1	| Symbols: PHOT2, NPL1 | phototropin 2 | chr5:23524771-23529993 FORWARD LENGTH=915	RSsEESTSSESGAFPR	S3 Phospho	0.01	0	207.08	0.9985	52.74	30.76	2	1792.73	598.586	3	0.0083	4.63	104	119
AT5G58140.1	| Symbols: PHOT2, NPL1 | phototropin 2 | chr5:23524771-23529993 FORWARD LENGTH=915	SSEESTsSESGAFPR	S7 Phospho	0	0	251.58	0.9985	52.19	28.94	2	1636.63	819.324	2	0.00819	5	105	119
AT5G58140.1	| Symbols: PHOT2, NPL1 | phototropin 2 | chr5:23524771-23529993 FORWARD LENGTH=915	SSEESTSSEsGAFPR	S10 Phospho	0.2	0	149.93	0.9983	35.4	28.91	2	1636.63	819.324	2	0.00883	5.39	105	119
AT4G25500.3	| Symbols: ATRSP35, ATRSP40, AT-SRP40, RSP35, RS40, At-RS40 | arginine/serine-rich splicing factor 35 | chr4:13025850-13027243 FORWARD LENGTH=317	NGVGEVEsPIER	S8 Phospho	1	1000	265.04	1	51.62	30.35	2	1364.6	683.308	2	0.00449	3.29	258	269
AT4G25500.3	| Symbols: ATRSP35, ATRSP40, AT-SRP40, RSP35, RS40, At-RS40 | arginine/serine-rich splicing factor 35 | chr4:13025850-13027243 FORWARD LENGTH=317	GAsPVAAYR	S3 Phospho	1	130.85	101.37	1	40	28.62	2	970.432	486.223	2	0.00443	4.56	176	184
AT3G57150.1	| Symbols: NAP57, AtNAP57, CBF5, AtCBF5 | homologue of NAP57 | chr3:21154255-21155952 REVERSE LENGTH=565	KHDDSSDsPAPVTTK	S8 Phospho	1	74.63	372.67	0.9969	73.95	30.79	2	1663.71	832.862	2	0.000788	0.473	443	457
AT3G57150.1	| Symbols: NAP57, AtNAP57, CBF5, AtCBF5 | homologue of NAP57 | chr3:21154255-21155952 REVERSE LENGTH=565	KEEVIEEVAsPK	S10 Phospho	1	1000	177.11	0.9989	16.56	30.12	2	1436.69	719.35	2	0.00575	4	506	517
AT3G57150.1	| Symbols: NAP57, AtNAP57, CBF5, AtCBF5 | homologue of NAP57 | chr3:21154255-21155952 REVERSE LENGTH=565	EEVIEEVAsPK	S9 Phospho	1	1000	204.04	1	48.73	29.82	2	1308.59	655.303	2	0.00581	4.43	507	517
AT3G57150.1	| Symbols: NAP57, AtNAP57, CBF5, AtCBF5 | homologue of NAP57 | chr3:21154255-21155952 REVERSE LENGTH=565	SKDTEAAVDAEDEsAAEK	S14 Phospho	1	269.08	311.8	1	57.05	30.84	2	1944.79	973.403	2	0.00665	3.42	526	543
AT3G57150.1	| Symbols: NAP57, AtNAP57, CBF5, AtCBF5 | homologue of NAP57 | chr3:21154255-21155952 REVERSE LENGTH=565	HDDSSDsPAPVTTK	S7 Phospho	1	50.64	338.26	0.9994	69.75	29.21	2	1535.62	768.816	2	0.00265	1.72	444	457
AT3G57150.1	| Symbols: NAP57, AtNAP57, CBF5, AtCBF5 | homologue of NAP57 | chr3:21154255-21155952 REVERSE LENGTH=565	HDDSsDSPAPVTTK	S5 Phospho	0.49	0	98.41	0.9492	11.89	29.33	2	1535.62	768.817	2	0.00555	3.61	444	457
AT3G57150.1	| Symbols: NAP57, AtNAP57, CBF5, AtCBF5 | homologue of NAP57 | chr3:21154255-21155952 REVERSE LENGTH=565	DTEAAVDAEDEsAAEK	S12 Phospho	1	275.53	250.73	1	42.4	29.66	2	1729.66	865.838	2	0.00497	2.87	528	543
AT3G57150.1	| Symbols: NAP57, AtNAP57, CBF5, AtCBF5 | homologue of NAP57 | chr3:21154255-21155952 REVERSE LENGTH=565	KHDDSsDSPAPVTTK	S6 Phospho	0.49	0	69.31	0.9197	11.63	30.79	2	1663.71	832.864	2	0.00361	2.17	443	457
AT5G43830.1	| Symbols: | Aluminium induced protein with YGL and LRDR motifs | chr5:17622593-17624239 REVERSE LENGTH=251	VDsSGDVcGATFK	S3 Phospho	1	55.92	227.32	0.9994	91.26	28.9	2	1421.56	711.786	2	0.00326	2.29	214	226
AT5G43830.1	| Symbols: | Aluminium induced protein with YGL and LRDR motifs | chr5:17622593-17624239 REVERSE LENGTH=251	VDsSQNWAGHI	S3 Phospho	1	58.42	228.45	0.9996	90.08	29.29	2	1292.52	647.269	2	0.00453	3.5	241	251
AT5G43830.1	| Symbols: | Aluminium induced protein with YGL and LRDR motifs | chr5:17622593-17624239 REVERSE LENGTH=251	TVANSPEALQsPHSSESAFALK	S11 Phospho	1	56.2	241.6	1	64.8	32.88	2	2350.09	1176.05	2	0.00825	3.51	8	29
AT5G43830.1	| Symbols: | Aluminium induced protein with YGL and LRDR motifs | chr5:17622593-17624239 REVERSE LENGTH=251	VDSsQNWAGHI	S4 Phospho	0.5	0	76.48	0.9789	15.73	29.29	2	1292.52	647.269	2	0.00463	3.58	241	251
AT5G43830.1	| Symbols: | Aluminium induced protein with YGL and LRDR motifs | chr5:17622593-17624239 REVERSE LENGTH=251	VDSsGDVcGATFK	S4 Phospho	0.33	0	99	0.9703	16.1	29.06	2	1421.56	711.788	2	0.0078	5.49	214	226
AT5G20280.1	| Symbols: ATSPS1F, SPS1F | sucrose phosphate synthase 1F | chr5:6844994-6849997 REVERSE LENGTH=1043	INsAESMELWASQQK	S3 Phospho	1	26.2	148.42	0.9962	32.38	31.21	2	1800.79	901.401	2	0.0125	6.95	150	164
AT5G20280.1	| Symbols: ATSPS1F, SPS1F | sucrose phosphate synthase 1F | chr5:6844994-6849997 REVERSE LENGTH=1043	DIQDIsLNLK	S6 Phospho	1	1000	155.77	1	32.77	30.52	2	1237.6	619.808	2	0.00615	4.96	695	704
AT5G20280.1	| Symbols: ATSPS1F, SPS1F | sucrose phosphate synthase 1F | chr5:6844994-6849997 REVERSE LENGTH=1043	SsPSLLLR	S2 Phospho	0.5	0	110.8	0.99	20.69	28.91	2	951.482	476.748	2	0.00319	3.35	26	33
AT4G38550.1	| Symbols: | Arabidopsis phospholipase-like protein (PEARLI 4) family | chr4:18025886-18028546 FORWARD LENGTH=612	sPPPSYLSNK	S1 Phospho	1	53.49	87.17	0.9994	21.25	29.8	2	1168.52	585.267	2	0.00363	3.1	41	50
AT4G38550.1	| Symbols: | Arabidopsis phospholipase-like protein (PEARLI 4) family | chr4:18025886-18028546 FORWARD LENGTH=612	STPGsPAHPPGAR	S5 Phospho	1	46.67	135.43	0.9987	29.78	29.97	2	1310.58	656.297	2	0.00323	2.46	28	40
AT4G38550.1	| Symbols: | Arabidopsis phospholipase-like protein (PEARLI 4) family | chr4:18025886-18028546 FORWARD LENGTH=612	SPsPSPFHTPDR	S3 Phospho	0.99	20.77	115.68	0.9921	18.46	29.47	2	1403.59	702.803	2	0.00459	3.27	160	171
AT4G38550.1	| Symbols: | Arabidopsis phospholipase-like protein (PEARLI 4) family | chr4:18025886-18028546 FORWARD LENGTH=612	EQIEDFYEQDDDVtPR	T14 Phospho	1	133.02	325.2	1	70.95	31.09	2	2077.83	1039.92	2	0.00935	4.5	259	274
AT4G38550.1	| Symbols: | Arabidopsis phospholipase-like protein (PEARLI 4) family | chr4:18025886-18028546 FORWARD LENGTH=612	EQFEDLYEQDGDVtPR	T14 Phospho	1	93.9	145.59	0.9996	30.53	30.92	2	2019.82	1010.92	2	0.00765	3.78	219	234
AT4G38550.1	| Symbols: | Arabidopsis phospholipase-like protein (PEARLI 4) family | chr4:18025886-18028546 FORWARD LENGTH=612	NSSPPsPFHPAAYK	S6 Phospho	1	40.66	169.51	0.9996	38.19	30.95	2	1578.69	790.354	2	0.00649	4.11	235	248
AT4G38550.1	| Symbols: | Arabidopsis phospholipase-like protein (PEARLI 4) family | chr4:18025886-18028546 FORWARD LENGTH=612	SNYDKEQFEDLYEQDGDVtPR	T19 Phospho	1	106.34	150.79	0.9991	23.33	32.75	2	2627.08	876.702	3	0.013	4.94	214	234
AT3G17850.1	| Symbols: | Protein kinase superfamily protein | chr3:6109854-6116245 REVERSE LENGTH=1296	LQNVASSSGtGR	T10 Phospho	0.25	0	130.91	0.9908	18.03	29.64	2	1255.56	628.788	2	0.00557	4.43	229	240
AT3G17850.1	| Symbols: | Protein kinase superfamily protein | chr3:6109854-6116245 REVERSE LENGTH=1296	SLsPTLPPSGSR	S3 Phospho	1	23.19	97.6	0.9408	11	29.56	2	1277.61	639.81	2	0.00457	3.57	217	228
AT3G17850.1	| Symbols: | Protein kinase superfamily protein | chr3:6109854-6116245 REVERSE LENGTH=1296	VSNSHLTEESDVLsPR	S14 Phospho	0.99	20.2	124.6	0.9578	14.31	31.86	2	1848.83	925.423	2	0.00565	3.05	669	684
AT3G17850.1	| Symbols: | Protein kinase superfamily protein | chr3:6109854-6116245 REVERSE LENGTH=1296	LQNVAsSSGTGR	S6 Phospho	1	27.96	249.28	0.9992	61.81	29.48	2	1255.56	628.787	2	0.00403	3.21	229	240
AT3G17850.1	| Symbols: | Protein kinase superfamily protein | chr3:6109854-6116245 REVERSE LENGTH=1296	ESEsPANIDR	S4 Phospho	0.5	0	103.08	0.9989	25.72	28.51	2	1196.48	599.245	2	0.00415	3.46	506	515
AT3G17850.1	| Symbols: | Protein kinase superfamily protein | chr3:6109854-6116245 REVERSE LENGTH=1296	LQNVASSsGTGR	S8 Phospho	0.25	0	145.23	0.996	24.55	29.48	2	1255.56	628.787	2	0.00339	2.7	229	240
AT2G33830.1	| Symbols: | Dormancy/auxin associated family protein | chr2:14309768-14310286 REVERSE LENGTH=106	TVAAVAGSPGTPtTPGSAR	T13 Phospho	0.33	0	309.79	0.9981	70.19	31.52	2	1776.85	889.43	2	0.00411	2.31	38	56
AT2G33830.1	| Symbols: | Dormancy/auxin associated family protein | chr2:14309768-14310286 REVERSE LENGTH=106	TVAAVAGSPGTPTtPGSAR	T14 Phospho	0.33	0	154.93	0.9812	18.66	34.89	2	1776.85	889.431	2	0.00637	3.58	38	56
AT2G33830.1	| Symbols: | Dormancy/auxin associated family protein | chr2:14309768-14310286 REVERSE LENGTH=106	TVAAVAGsPGTPTTPGSAR	S8 Phospho	1	74.63	282.65	1	90.62	31.45	2	1776.85	889.431	2	0.00707	3.98	38	56
AT2G33830.1	| Symbols: | Dormancy/auxin associated family protein | chr2:14309768-14310286 REVERSE LENGTH=106	TVAAVAGSPGtPTTPGSAR	T11 Phospho	0	0	204.44	0.9985	47.32	31.46	2	1776.85	593.29	3	0.0067	3.77	38	56
AT2G33830.1	| Symbols: | Dormancy/auxin associated family protein | chr2:14309768-14310286 REVERSE LENGTH=106	TVAAVAGSPGTPTTPGsAR	S17 Phospho	1	26.2	292.1	0.9984	45.93	31.4	2	1776.85	889.432	2	0.00843	4.74	38	56
AT4G05150.1	| Symbols: | Octicosapeptide/Phox/Bem1p family protein | chr4:2660339-2662675 FORWARD LENGTH=477	EVSTLSDPGsPR	S10 Phospho	1	63.89	208.25	1	57.44	29.68	2	1323.57	662.795	2	0.00409	3.09	261	272
AT4G05150.1	| Symbols: | Octicosapeptide/Phox/Bem1p family protein | chr4:2660339-2662675 FORWARD LENGTH=477	EVsTLSDPGSPR	S3 Phospho	1	23.98	119.94	0.9956	23.64	29.6	2	1323.57	662.794	2	0.00235	1.77	261	272
AT4G05150.1	| Symbols: | Octicosapeptide/Phox/Bem1p family protein | chr4:2660339-2662675 FORWARD LENGTH=477	ASsISSLLDSSVNR	S3 Phospho	1	24.95	142.48	0.9983	39.06	30.72	2	1514.7	758.36	2	0.00723	4.77	175	188
AT4G05150.1	| Symbols: | Octicosapeptide/Phox/Bem1p family protein | chr4:2660339-2662675 FORWARD LENGTH=477	ASSISSLLDSsVNR	S11 Phospho	0.48	0	37.39	0.9933	24.27	30.76	2	1514.71	758.36	2	0.00865	5.71	175	188
AT4G05150.1	| Symbols: | Octicosapeptide/Phox/Bem1p family protein | chr4:2660339-2662675 FORWARD LENGTH=477	EVSTLSDPGsPRR	S10 Phospho	1	43.97	153.45	0.9989	30.52	30.71	2	1479.68	740.846	2	0.00481	3.25	261	273
AT4G05150.1	| Symbols: | Octicosapeptide/Phox/Bem1p family protein | chr4:2660339-2662675 FORWARD LENGTH=477	ISTPELPPPVFIKPEsPEPVSTPK	S16 Phospho	1	45.19	109.87	0.9962	19.01	29.55	2	2665.38	889.466	3	0.00996	3.74	290	313
AT4G05150.1	| Symbols: | Octicosapeptide/Phox/Bem1p family protein | chr4:2660339-2662675 FORWARD LENGTH=477	NVAGEEDNDsR	S10 Phospho	1	1000	46.72	0.9433	7.4	26.65	2	1284.47	643.241	2	0.00527	4.1	164	174
AT3G53500.1	| Symbols: RSZ32, RS2Z32, At-RS2Z | RNA-binding (RRM/RBD/RNP motifs) family protein with retrovirus zinc finger-like domain | chr3:19834557-19835896 REVERSE LENGTH=243	DQSLsPDR	S5 Phospho	1	48.15	115.15	0.99	19.68	26.24	2	996.395	499.205	2	0.00367	3.68	171	178
AT3G53500.1	| Symbols: RSZ32, RS2Z32, At-RS2Z | RNA-binding (RRM/RBD/RNP motifs) family protein with retrovirus zinc finger-like domain | chr3:19834557-19835896 REVERSE LENGTH=243	SPIDDEAELSRPsPK	S13 Phospho	1	50.19	195.56	0.9501	11.27	31.91	2	1719.78	860.897	2	0.00677	3.93	224	238
AT3G53500.1	| Symbols: RSZ32, RS2Z32, At-RS2Z | RNA-binding (RRM/RBD/RNP motifs) family protein with retrovirus zinc finger-like domain | chr3:19834557-19835896 REVERSE LENGTH=243	DQsLSPDR	S3 Phospho	1	46.21	113.99	0.99	15.59	31.2	2	996.395	499.205	2	0.00337	3.38	171	178
AT3G53500.1	| Symbols: RSZ32, RS2Z32, At-RS2Z | RNA-binding (RRM/RBD/RNP motifs) family protein with retrovirus zinc finger-like domain | chr3:19834557-19835896 REVERSE LENGTH=243	VIDAsPKR	S5 Phospho	1	1000	91.82	0.99	16.19	28.16	2	964.478	483.246	2	0.00317	3.28	180	187
AT3G53500.1	| Symbols: RSZ32, RS2Z32, At-RS2Z | RNA-binding (RRM/RBD/RNP motifs) family protein with retrovirus zinc finger-like domain | chr3:19834557-19835896 REVERSE LENGTH=243	KVIDAsPK	S6 Phospho	1	1000	79.72	0.962	11.8	28.63	2	936.47	469.242	2	0.00157	1.67	179	186
AT5G24460.1	| Symbols: | unknown protein; INVOLVED IN: biological_process unknown; LOCATED IN: cell wall; EXPRESSED IN: 24 plant structures; EXPRESSED DURING: 15 growth stages; Has 1807 Blast hits to 1807 proteins in 277 species: Archae - 0; Bacteria - 0; Metazoa - 736; Fungi - 347; Plants - 385; Viruses - 0; Other Eukaryotes - 339 (source: NCBI BLink). | chr5:8354815-8355717 FORWARD LENGTH=300	sPPPPPPTQR	S1 Phospho	1	106.83	108.14	1	32.15	29.91	2	1152.54	577.276	2	0.00413	3.58	78	87
AT5G24460.1	| Symbols: | unknown protein; INVOLVED IN: biological_process unknown; LOCATED IN: cell wall; EXPRESSED IN: 24 plant structures; EXPRESSED DURING: 15 growth stages; Has 1807 Blast hits to 1807 proteins in 277 species: Archae - 0; Bacteria - 0; Metazoa - 736; Fungi - 347; Plants - 385; Viruses - 0; Other Eukaryotes - 339 (source: NCBI BLink). | chr5:8354815-8355717 FORWARD LENGTH=300	RsPPPPPPTQR	S2 Phospho	1	198.86	163.87	0.9995	28.11	30.42	2	1308.64	437.22	3	0.00364	2.78	77	87
AT5G53440.1	| Symbols: | unknown protein; FUNCTIONS IN: molecular_function unknown; INVOLVED IN: biological_process unknown; LOCATED IN: cytosol; EXPRESSED IN: 25 plant structures; EXPRESSED DURING: 15 growth stages; Has 1807 Blast hits to 1807 proteins in 277 species: Archae - 0; Bacteria - 0; Metazoa - 736; Fungi - 347; Plants - 385; Viruses - 0; Other Eukaryotes - 339 (source: NCBI BLink). | chr5:21683679…	sIEVEETGHR	S1 Phospho	1	145.62	165.27	1	44.63	29.33	2	1235.52	618.769	2	0.00453	3.66	551	560
AT5G53440.1	| Symbols: | unknown protein; FUNCTIONS IN: molecular_function unknown; INVOLVED IN: biological_process unknown; LOCATED IN: cytosol; EXPRESSED IN: 25 plant structures; EXPRESSED DURING: 15 growth stages; Has 1807 Blast hits to 1807 proteins in 277 species: Archae - 0; Bacteria - 0; Metazoa - 736; Fungi - 347; Plants - 385; Viruses - 0; Other Eukaryotes - 339 (source: NCBI BLink). | chr5:21683679…	sPGTENYTEK	S1 Phospho	1	132.02	222.31	1	66.96	27.48	2	1204.47	603.242	2	0.00415	3.44	184	193
AT5G53440.1	| Symbols: | unknown protein; FUNCTIONS IN: molecular_function unknown; INVOLVED IN: biological_process unknown; LOCATED IN: cytosol; EXPRESSED IN: 25 plant structures; EXPRESSED DURING: 15 growth stages; Has 1807 Blast hits to 1807 proteins in 277 species: Archae - 0; Bacteria - 0; Metazoa - 736; Fungi - 347; Plants - 385; Viruses - 0; Other Eukaryotes - 339 (source: NCBI BLink). | chr5:21683679…	sPDYQDYQDVITGSR	S1 Phospho	1	79.9	227.63	1	73.68	30.65	2	1822.75	912.381	2	0.00681	3.73	427	441
AT5G53440.1	| Symbols: | unknown protein; FUNCTIONS IN: molecular_function unknown; INVOLVED IN: biological_process unknown; LOCATED IN: cytosol; EXPRESSED IN: 25 plant structures; EXPRESSED DURING: 15 growth stages; Has 1807 Blast hits to 1807 proteins in 277 species: Archae - 0; Bacteria - 0; Metazoa - 736; Fungi - 347; Plants - 385; Viruses - 0; Other Eukaryotes - 339 (source: NCBI BLink). | chr5:21683679…	IADVsDSDTSQK	S5 Phospho	1	46.21	202.36	1	48.55	28.85	2	1344.55	673.282	2	0.00365	2.71	985	996
AT5G53440.1	| Symbols: | unknown protein; FUNCTIONS IN: molecular_function unknown; INVOLVED IN: biological_process unknown; LOCATED IN: cytosol; EXPRESSED IN: 25 plant structures; EXPRESSED DURING: 15 growth stages; Has 1807 Blast hits to 1807 proteins in 277 species: Archae - 0; Bacteria - 0; Metazoa - 736; Fungi - 347; Plants - 385; Viruses - 0; Other Eukaryotes - 339 (source: NCBI BLink). | chr5:21683679…	RsPDYQDYQDVITGSR	S2 Phospho	1	124.16	131.38	0.9994	24.16	31.31	2	1978.85	990.432	2	0.00767	3.87	426	441
AT5G53440.1	| Symbols: | unknown protein; FUNCTIONS IN: molecular_function unknown; INVOLVED IN: biological_process unknown; LOCATED IN: cytosol; EXPRESSED IN: 25 plant structures; EXPRESSED DURING: 15 growth stages; Has 1807 Blast hits to 1807 proteins in 277 species: Archae - 0; Bacteria - 0; Metazoa - 736; Fungi - 347; Plants - 385; Viruses - 0; Other Eukaryotes - 339 (source: NCBI BLink). | chr5:21683679…	EYsDSEKETSLK	S3 Phospho	0.49	0	146.89	0.9989	37.84	30	2	1494.62	748.317	2	0.00601	4.02	18	29
AT5G53440.1	| Symbols: | unknown protein; FUNCTIONS IN: molecular_function unknown; INVOLVED IN: biological_process unknown; LOCATED IN: cytosol; EXPRESSED IN: 25 plant structures; EXPRESSED DURING: 15 growth stages; Has 1807 Blast hits to 1807 proteins in 277 species: Archae - 0; Bacteria - 0; Metazoa - 736; Fungi - 347; Plants - 385; Viruses - 0; Other Eukaryotes - 339 (source: NCBI BLink). | chr5:21683679…	AKsVEAGSNLTSPAK	S3 Phospho	1	126.56	243.76	1	65.31	30.96	2	1538.74	770.378	2	0.00751	4.88	810	824
AT3G13570.1	| Symbols: SCL30A, At-SCL30A | SC35-like splicing factor 30A | chr3:4429564-4431602 REVERSE LENGTH=262	GYNsPPAK	S4 Phospho	1	86.89	111.91	0.99	17.12	27.36	2	912.378	457.196	2	0.00407	4.45	163	170
AT3G13570.1	| Symbols: SCL30A, At-SCL30A | SC35-like splicing factor 30A | chr3:4429564-4431602 REVERSE LENGTH=262	GYNsPPAKR	S4 Phospho	1	104.79	123.44	0.9995	25.72	29.49	2	1068.48	535.247	2	0.00323	3.02	163	171
AT3G13570.1	| Symbols: SCL30A, At-SCL30A | SC35-like splicing factor 30A | chr3:4429564-4431602 REVERSE LENGTH=262	sYTPEQAR	S1 Phospho	0.33	0	121.86	0.9193	17	27.32	2	1030.42	516.217	2	0.00783	7.59	227	234
AT3G13570.1	| Symbols: SCL30A, At-SCL30A | SC35-like splicing factor 30A | chr3:4429564-4431602 REVERSE LENGTH=262	SYtPEQAR	T3 Phospho	0.18	26.2	159.85	0.99	35.23	27.36	2	1030.42	516.216	2	0.00549	5.32	227	234
AT1G52380.1	| Symbols: | NUP50 (Nucleoporin 50 kDa) protein | chr1:19509979-19511301 FORWARD LENGTH=440	TPENsPTATDT	S5 Phospho	0.25	0	101.19	0.9929	20.35	26.48	2	1212.46	607.236	2	0.00179	1.47	430	440
AT1G52380.1	| Symbols: | NUP50 (Nucleoporin 50 kDa) protein | chr1:19509979-19511301 FORWARD LENGTH=440	GDsENVQQPSK	S3 Phospho	1	111.64	119.07	0.9961	22.33	28.07	1	1267.51	634.761	2	-0.00153	-1.21	2	12
AT1G52380.1	| Symbols: | NUP50 (Nucleoporin 50 kDa) protein | chr1:19509979-19511301 FORWARD LENGTH=440	LAPAEAVVEDNQKAsDIEEGDEVDSK	S15 Phospho	1	158.78	204.42	1	33.62	33.26	2	2837.26	946.761	3	0.0108	3.81	100	125
AT1G52380.1	| Symbols: | NUP50 (Nucleoporin 50 kDa) protein | chr1:19509979-19511301 FORWARD LENGTH=440	AsDIEEGDEVDSK	S2 Phospho	1	190.74	182.29	1	42.53	28.57	2	1472.56	737.289	2	0.00733	4.97	113	125
AT1G52380.1	| Symbols: | NUP50 (Nucleoporin 50 kDa) protein | chr1:19509979-19511301 FORWARD LENGTH=440	TPENSPtATDT	T7 Phospho	0.25	0	147.93	0.9962	21.03	26.37	2	1212.46	607.237	2	0.00361	2.97	430	440
AT1G52380.1	| Symbols: | NUP50 (Nucleoporin 50 kDa) protein | chr1:19509979-19511301 FORWARD LENGTH=440	DNPGLDDDDDsAELESGTFK	S11 Phospho	1	72.13	95.22	0.9438	10.39	30.49	2	2218.85	1110.43	2	0.0114	5.16	23	42
AT4G15802.1	| Symbols: HSBP, AtHSBP | heat shock factor binding protein | chr4:8986864-8988339 REVERSE LENGTH=86	SGDEPKtPASSS	T7 Phospho	1	100.09	213.39	0.9993	35.96	27.91	2	1241.48	621.749	2	0.00223	1.79	75	86
AT1G07110.1	| Symbols: F2KP, ATF2KP, FKFBP | fructose-2,6-bisphosphatase | chr1:2178363-2183980 REVERSE LENGTH=744	NsEDSGVTVDGSPSAK	S2 Phospho	1	50.19	169.96	1	54.06	30.17	2	1628.66	815.339	2	0.00751	4.61	233	248
AT1G07110.1	| Symbols: F2KP, ATF2KP, FKFBP | fructose-2,6-bisphosphatase | chr1:2178363-2183980 REVERSE LENGTH=744	SVETLsPFQQK	S6 Phospho	1	111.84	280.23	1	73.05	30.32	2	1342.62	672.319	2	0.00591	4.4	271	281
AT1G07110.1	| Symbols: F2KP, ATF2KP, FKFBP | fructose-2,6-bisphosphatase | chr1:2178363-2183980 REVERSE LENGTH=744	sVETLSPFQQK	S1 Phospho	1	90.37	131.6	0.9994	26.36	30.58	2	1342.62	672.318	2	0.00419	3.12	271	281
AT1G07110.1	| Symbols: F2KP, ATF2KP, FKFBP | fructose-2,6-bisphosphatase | chr1:2178363-2183980 REVERSE LENGTH=744	NSEDSGVTVDGsPSAK	S12 Phospho	1	23.2	296.58	0.9989	55.85	30.18	2	1628.66	815.338	2	0.00383	2.35	233	248
AT1G07110.1	| Symbols: F2KP, ATF2KP, FKFBP | fructose-2,6-bisphosphatase | chr1:2178363-2183980 REVERSE LENGTH=744	SLsASSFLIDTK	S3 Phospho	1	53.65	255.61	1	84.54	30.42	2	1347.63	674.824	2	0.000428	0.317	301	312
AT1G07110.1	| Symbols: F2KP, ATF2KP, FKFBP | fructose-2,6-bisphosphatase | chr1:2178363-2183980 REVERSE LENGTH=744	NSEDSGVTVDGSPsAK	S14 Phospho	1	21.95	227.5	0.9974	40.33	34.11	2	1628.67	815.341	2	0.0104	6.39	233	248
AT1G17210.1	| Symbols: ATILP1, ILP1 | IAP-like protein 1 | chr1:5880502-5884657 REVERSE LENGTH=958	ADsVEGTVVDR	S3 Phospho	1	113.53	205.03	1	58.4	33.5	2	1226.52	614.268	2	0.00409	3.33	503	513
AT1G17210.1	| Symbols: ATILP1, ILP1 | IAP-like protein 1 | chr1:5880502-5884657 REVERSE LENGTH=958	KAsGNYEVLGPEYK	S3 Phospho	1	88.06	288.2	1	63.85	31.21	2	1633.74	817.879	2	0.00523	3.2	320	333
AT1G17210.1	| Symbols: ATILP1, ILP1 | IAP-like protein 1 | chr1:5880502-5884657 REVERSE LENGTH=958	QPsGSEVGDR	S3 Phospho	1	50.64	149.17	0.9995	31.82	27.09	2	1110.44	556.227	2	0.00445	4	461	470
AT1G17210.1	| Symbols: ATILP1, ILP1 | IAP-like protein 1 | chr1:5880502-5884657 REVERSE LENGTH=958	NSVASAsASASATPVDR	S7 Phospho	1	24.95	245.65	0.9986	53.64	31.2	2	1669.74	835.875	2	0.00499	2.99	18	34
AT1G17210.1	| Symbols: ATILP1, ILP1 | IAP-like protein 1 | chr1:5880502-5884657 REVERSE LENGTH=958	DGDEVNDDsAGPSK	S9 Phospho	1	47.48	203.8	0.9991	31.36	27.16	2	1484.54	743.276	2	0.00721	4.85	514	527
AT1G17210.1	| Symbols: ATILP1, ILP1 | IAP-like protein 1 | chr1:5880502-5884657 REVERSE LENGTH=958	LGDSQDRVsQSVVR	S9 Phospho	1	34.59	98.93	0.9851	17.44	31.45	2	1624.76	813.388	2	0.00475	2.92	759	772
AT1G17210.1	| Symbols: ATILP1, ILP1 | IAP-like protein 1 | chr1:5880502-5884657 REVERSE LENGTH=958	NSVASASAsASATPVDR	S9 Phospho	0	0	293.88	0.9976	91.79	31.03	2	1669.74	835.877	2	0.00781	4.67	18	34
AT2G03150.1	| Symbols: emb1579 | ATP/GTP-binding protein family | chr2:952313-959004 FORWARD LENGTH=1340	sPGDTSGTPTTGTK	S1 Phospho	1	147.48	252.11	1	84.71	28.96	2	1385.58	693.795	2	0.00455	3.28	734	747
AT2G03150.1	| Symbols: emb1579 | ATP/GTP-binding protein family | chr2:952313-959004 FORWARD LENGTH=1340	KsPGDTSGTPTTGTK	S2 Phospho	1	37.67	137.43	0.9967	36.97	30.64	2	1513.67	505.563	3	0.00124	0.82	733	747
AT2G03150.1	| Symbols: emb1579 | ATP/GTP-binding protein family | chr2:952313-959004 FORWARD LENGTH=1340	DAEKKsPGDTSGTPTTGTK	S6 Phospho	1	53.49	116.21	0.9982	29.24	31.49	2	1956.87	979.442	2	0.00181	0.923	729	747
AT2G03150.1	| Symbols: emb1579 | ATP/GTP-binding protein family | chr2:952313-959004 FORWARD LENGTH=1340	FASGSYLsPSSHGYGQK	S8 Phospho	1	46.21	204.66	0.9983	41.29	31.26	2	1851.79	926.9	2	0.00347	1.87	125	141
AT2G03150.1	| Symbols: emb1579 | ATP/GTP-binding protein family | chr2:952313-959004 FORWARD LENGTH=1340	VAETGDTsDPSAK	S8 Phospho	0.33	0	82.74	0.9859	17.19	29.05	2	1356.55	679.283	2	0.00623	4.59	806	818
AT2G03150.1	| Symbols: emb1579 | ATP/GTP-binding protein family | chr2:952313-959004 FORWARD LENGTH=1340	KSPGDTSGtPTTGTK	T9 Phospho	0.02	0	73.95	0.9438	14.92	30.6	2	1513.67	505.564	3	0.00244	1.61	733	747
AT2G03150.1	| Symbols: emb1579 | ATP/GTP-binding protein family | chr2:952313-959004 FORWARD LENGTH=1340	SGYVPTLPDsPK	S10 Phospho	1	70.16	173.23	1	34.24	30.12	2	1339.61	670.813	2	0.00531	3.96	113	124
AT1G20760.1	| Symbols: | Calcium-binding EF hand family protein | chr1:7209515-7214773 FORWARD LENGTH=1019	FDsFNTSEAGAGFSSQPER	S3 Phospho	1	26.2	233.74	0.9989	109.1	30.81	2	2112.85	1057.43	2	0.011	5.23	898	916
AT1G20760.1	| Symbols: | Calcium-binding EF hand family protein | chr1:7209515-7214773 FORWARD LENGTH=1019	FDsINSSK	S3 Phospho	1	74.63	142.04	0.99	34.29	28.92	2	976.395	489.205	2	0.00515	5.27	920	927
AT1G20760.1	| Symbols: | Calcium-binding EF hand family protein | chr1:7209515-7214773 FORWARD LENGTH=1019	NATEVPsPDYSQGK	S7 Phospho	1	40.66	217.64	0.9988	32.99	29.83	2	1571.65	786.833	2	0.00149	0.946	782	795
AT1G20760.1	| Symbols: | Calcium-binding EF hand family protein | chr1:7209515-7214773 FORWARD LENGTH=1019	FDSFNTsEAGAGFSSQPER	S7 Phospho	0.33	0	99.35	0.9759	24.11	30.98	2	2112.86	705.293	3	0.0157	7.43	898	916
AT1G20760.1	| Symbols: | Calcium-binding EF hand family protein | chr1:7209515-7214773 FORWARD LENGTH=1019	sQDGDYFGSGDDFGGNTAR	S1 Phospho	1	51.44	252.65	1	89.85	28.4	2	2044.74	1023.38	2	-0.00205	-1	826	844
AT1G20760.1	| Symbols: | Calcium-binding EF hand family protein | chr1:7209515-7214773 FORWARD LENGTH=1019	FDsINSSR	S3 Phospho	1	48.75	73.32	0.99	13.53	27.47	2	1004.4	503.208	2	0.00499	4.96	937	944
AT1G20760.1	| Symbols: | Calcium-binding EF hand family protein | chr1:7209515-7214773 FORWARD LENGTH=1019	ENGtVDDGSGPPDSPTHVEDNYGPFSETSDR	T4 Phospho	0.24	0	82.44	0.9736	16.01	32.29	2	3357.34	1120.12	3	0.0138	4.1	728	758
AT1G20760.1	| Symbols: | Calcium-binding EF hand family protein | chr1:7209515-7214773 FORWARD LENGTH=1019	FDSINsSKDFGGPSLSR	S6 Phospho	0.96	20.19	96.86	0.9931	18.14	31.54	2	1892.84	947.426	2	0.00635	3.35	955	971
AT1G20760.1	| Symbols: | Calcium-binding EF hand family protein | chr1:7209515-7214773 FORWARD LENGTH=1019	ENGTVDDGSGPPDSPtHVEDNYGPFSETSDR	T16 Phospho	0.32	0	71.98	0.9398	13.58	32.34	2	3357.34	1120.12	3	0.0165	4.9	728	758
AT1G20760.1	| Symbols: | Calcium-binding EF hand family protein | chr1:7209515-7214773 FORWARD LENGTH=1019	FDSINsSK	S6 Phospho	0.99	23.19	148.79	0.99	31.53	28.65	2	976.395	489.205	2	0.00449	4.59	920	927
AT1G67230.1	| Symbols: LINC1 | little nuclei1 | chr1:25151561-25156032 REVERSE LENGTH=1132	EVEVTNVNsDGDQSDINSK	S9 Phospho	1	100.67	403.36	1	87.09	31.1	2	2128.89	1065.45	2	0.00695	3.26	857	875
AT1G67230.1	| Symbols: LINC1 | little nuclei1 | chr1:25151561-25156032 REVERSE LENGTH=1132	AQEVAADSLsNLDVDGQSR	S10 Phospho	0.5	0	110.03	0.9976	43.14	32.1	2	2053.91	685.643	3	0.0121	5.88	876	894
AT1G67230.1	| Symbols: LINC1 | little nuclei1 | chr1:25151561-25156032 REVERSE LENGTH=1132	VAsEQQGEVVGQR	S3 Phospho	1	1000	226.59	1	72.47	30.23	2	1465.66	733.838	2	0.00553	3.77	999	1011
AT1G67230.1	| Symbols: LINC1 | little nuclei1 | chr1:25151561-25156032 REVERSE LENGTH=1132	AQEVAADsLSNLDVDGQSR	S8 Phospho	1	27.96	313.23	0.9993	84.47	32.17	2	2053.9	1027.96	2	0.00875	4.26	876	894
AT1G67230.1	| Symbols: LINC1 | little nuclei1 | chr1:25151561-25156032 REVERSE LENGTH=1132	sVKDVVDDAK	S1 Phospho	1	1000	176.64	1	52.19	29.6	2	1154.53	578.27	2	0.00311	2.69	908	917
AT1G67230.1	| Symbols: LINC1 | little nuclei1 | chr1:25151561-25156032 REVERSE LENGTH=1132	TRsVKDVVDDAK	S3 Phospho	0.99	21.95	174.69	0.9957	21.12	30.72	2	1411.68	706.847	2	0.00767	5.43	906	917
AT1G67230.1	| Symbols: LINC1 | little nuclei1 | chr1:25151561-25156032 REVERSE LENGTH=1132	DIsPTAAGLGLPVTGGK	S3 Phospho	1	50.64	208.21	0.9977	70.78	30.98	2	1632.81	817.414	2	0.00133	0.813	772	788
AT1G67230.1	| Symbols: LINC1 | little nuclei1 | chr1:25151561-25156032 REVERSE LENGTH=1132	ADsDGEDDESDAEHPGK	S3 Phospho	1	22.53	68.7	0.9966	18.71	29.45	2	1852.63	927.322	2	0.00103	0.555	1103	1119
AT1G67230.1	| Symbols: LINC1 | little nuclei1 | chr1:25151561-25156032 REVERSE LENGTH=1132	TcTTEQDGNEsDGKSDSVTGGAHQR	S11 Phospho	1	33.27	162.24	0.9983	33.42	31.52	2	2716.07	906.365	3	0.00556	2.05	969	993
AT3G13300.2	| Symbols: VCS | Transducin/WD40 repeat-like superfamily protein | chr3:4304085-4309949 FORWARD LENGTH=1309	DcYPStEGTFIPGESK	T6 Phospho	0.33	0	177.21	0.9971	31.92	30.63	2	1866.75	934.382	2	0.0105	5.62	801	816
AT3G13300.2	| Symbols: VCS | Transducin/WD40 repeat-like superfamily protein | chr3:4304085-4309949 FORWARD LENGTH=1309	ESITSASsVAQALSR	S8 Phospho	0.2	0	131.89	0.9936	30.03	31.52	2	1585.74	793.879	2	0.00885	5.58	1114	1128
AT3G13300.2	| Symbols: VCS | Transducin/WD40 repeat-like superfamily protein | chr3:4304085-4309949 FORWARD LENGTH=1309	TLsYPTPPLNLQSPR	S3 Phospho	0.33	0	41.37	0.9175	10.59	31.43	2	1762.87	882.442	2	0.00411	2.33	51	65
AT3G13300.2	| Symbols: VCS | Transducin/WD40 repeat-like superfamily protein | chr3:4304085-4309949 FORWARD LENGTH=1309	TPsADYSVDR	S3 Phospho	1	48.15	184.21	1	51.12	27.54	2	1189.47	595.742	2	0.00435	3.65	655	664
AT3G13300.2	| Symbols: VCS | Transducin/WD40 repeat-like superfamily protein | chr3:4304085-4309949 FORWARD LENGTH=1309	TLSYPTPPLNLQsPR	S13 Phospho	1	38.87	112.55	0.9983	19.58	31.44	2	1762.87	882.442	2	0.00359	2.03	51	65
AT1G72340.1	| Symbols: | NagB/RpiA/CoA transferase-like superfamily protein | chr1:27236898-27238482 FORWARD LENGTH=382	SPsFILDER	S3 Phospho	1	48.15	151.38	0.9987	33.62	29.78	2	1142.51	572.26	2	0.00533	4.66	5	13
AT2G46020.2	| Symbols: CHR2, ATBRM, BRM, CHA2 | transcription regulatory protein SNF2, putative | chr2:18923304-18931769 FORWARD LENGTH=2193	TASTSsAASPSSSSSSVQQQQQQQQQQQQQQQLASR	S6 Phospho	0.08	0	64.94	0.9697	17	33.09	2	3927.77	982.949	4	0.01	2.55	22	57
AT2G46020.2	| Symbols: CHR2, ATBRM, BRM, CHA2 | transcription regulatory protein SNF2, putative | chr2:18923304-18931769 FORWARD LENGTH=2193	VPPQANsPQPPK	S7 Phospho	1	1000	146.89	0.9992	20.59	30.58	2	1338.64	670.327	2	0.00675	5.04	632	643
AT2G46020.2	| Symbols: CHR2, ATBRM, BRM, CHA2 | transcription regulatory protein SNF2, putative | chr2:18923304-18931769 FORWARD LENGTH=2193	LVNEPETEPSsPQR	S11 Phospho	0.49	0	102.94	0.9486	12.92	31.22	2	1661.74	831.875	2	0.00639	3.84	2046	2059
AT2G46020.2	| Symbols: CHR2, ATBRM, BRM, CHA2 | transcription regulatory protein SNF2, putative | chr2:18923304-18931769 FORWARD LENGTH=2193	ETWDGTsPISSSNAGAR	S7 Phospho	1	30.97	218.09	0.9993	64.4	30.86	2	1814.75	908.385	2	0.00745	4.1	1879	1895
AT2G46020.2	| Symbols: CHR2, ATBRM, BRM, CHA2 | transcription regulatory protein SNF2, putative | chr2:18923304-18931769 FORWARD LENGTH=2193	NIDsGNEEEGDIR	S4 Phospho	1	1000	212.75	1	44.43	33.25	2	1526.59	764.304	2	0.00383	2.51	1638	1650
AT2G46020.2	| Symbols: CHR2, ATBRM, BRM, CHA2 | transcription regulatory protein SNF2, putative | chr2:18923304-18931769 FORWARD LENGTH=2193	GLRsPVSGGVPR	S4 Phospho	1	70.88	147.74	0.9914	16.12	29.65	2	1260.64	631.326	2	0.00355	2.81	2134	2145
AT5G03040.3	| Symbols: iqd2 | IQ-domain 2 | chr5:710380-712406 REVERSE LENGTH=461	QSSSsPPPALAPR	S5 Phospho	1	26.2	179.04	0.9989	48.18	30.49	2	1373.64	687.826	2	0.00421	3.06	45	57
AT5G03040.3	| Symbols: iqd2 | IQ-domain 2 | chr5:710380-712406 REVERSE LENGTH=461	LKPQsPLGGTTQENEGFTDK	S5 Phospho	1	29.73	154.97	0.9989	39.44	32.44	2	2226.03	743.017	3	0.00907	4.07	402	421
AT5G03040.3	| Symbols: iqd2 | IQ-domain 2 | chr5:710380-712406 REVERSE LENGTH=461	NSFFSPPtPSR	T8 Phospho	1	24.95	159.35	0.9934	33.77	29.87	2	1315.57	658.792	2	0.00979	7.43	332	342
AT5G03040.3	| Symbols: iqd2 | IQ-domain 2 | chr5:710380-712406 REVERSE LENGTH=461	QSSsSPPPALAPR	S4 Phospho	0.99	23.98	235.38	0.9987	61.65	30.54	2	1373.64	687.827	2	0.00601	4.37	45	57
AT5G03040.3	| Symbols: iqd2 | IQ-domain 2 | chr5:710380-712406 REVERSE LENGTH=461	STISVLsER	S7 Phospho	1	90.37	153.86	0.9991	27.83	28.92	2	1070.5	536.259	2	0.00299	2.79	357	365
AT1G74910.1	| Symbols: | ADP-glucose pyrophosphorylase family protein | chr1:28135770-28138456 REVERSE LENGTH=415	VSsFEALQPATR	S3 Phospho	1	30.97	72.51	0.9936	19.37	30.66	2	1384.65	693.33	2	0.00651	4.7	216	227
AT1G74910.1	| Symbols: | ADP-glucose pyrophosphorylase family protein | chr1:28135770-28138456 REVERSE LENGTH=415	VsSFEALQPATR	S2 Phospho	0	0	104.71	0.9717	15.72	30.75	2	1384.64	693.329	2	0.00371	2.68	216	227
AT1G74910.1	| Symbols: | ADP-glucose pyrophosphorylase family protein | chr1:28135770-28138456 REVERSE LENGTH=415	RVSsFEALQPATR	S4 Phospho	0.99	21.95	116.55	0.9471	13.15	31.08	2	1540.74	771.379	2	0.00417	2.7	215	227
AT4G24100.1	| Symbols: | Protein kinase superfamily protein | chr4:12515223-12519336 FORWARD LENGTH=709	QSQsGPLTSR	S4 Phospho	1	68.84	127.41	0.9997	41.99	29.41	2	1139.5	570.758	2	0.00441	3.86	458	467
AT4G24100.1	| Symbols: | Protein kinase superfamily protein | chr4:12515223-12519336 FORWARD LENGTH=709	APsFSGPLNLSTR	S3 Phospho	1	27.96	150.6	0.9996	68.52	30.89	2	1425.67	713.844	2	0.00707	4.95	497	509
AT4G24100.1	| Symbols: | Protein kinase superfamily protein | chr4:12515223-12519336 FORWARD LENGTH=709	SAsVGNWILEPK	S3 Phospho	1	24.44	162.01	0.9987	37.48	30.35	2	1379.65	690.834	2	0.00553	4	574	585
AT4G24100.1	| Symbols: | Protein kinase superfamily protein | chr4:12515223-12519336 FORWARD LENGTH=709	TVLSHSAsEK	S8 Phospho	0.98	20.19	134.67	0.9991	39.9	28.96	2	1137.51	569.762	2	0.00297	2.61	468	477
AT4G24100.1	| Symbols: | Protein kinase superfamily protein | chr4:12515223-12519336 FORWARD LENGTH=709	RsPQATPLR	S2 Phospho	1	53.49	81.74	0.9989	19.97	28.98	2	1104.55	553.281	2	0.00401	3.63	564	572
AT4G24100.1	| Symbols: | Protein kinase superfamily protein | chr4:12515223-12519336 FORWARD LENGTH=709	sASVGNWILEPK	S1 Phospho	0	0	219.58	0.9987	71.9	30.16	2	1379.65	690.834	2	0.00455	3.29	574	585
AT4G24100.1	| Symbols: | Protein kinase superfamily protein | chr4:12515223-12519336 FORWARD LENGTH=709	ASSNSLsAPIK	S7 Phospho	1	24.95	132.23	1	42.32	30.31	2	1153.54	577.778	2	0.00419	3.63	510	520
AT4G24100.1	| Symbols: | Protein kinase superfamily protein | chr4:12515223-12519336 FORWARD LENGTH=709	ASsNSLSAPIK	S3 Phospho	0.5	0	138.15	0.9961	30.91	30.48	2	1153.54	577.778	2	0.00345	2.99	510	520
AT4G24100.1	| Symbols: | Protein kinase superfamily protein | chr4:12515223-12519336 FORWARD LENGTH=709	FTFVTTTsSLER	S8 Phospho	0.2	0	139.52	0.9856	17.29	30.52	2	1467.67	734.843	2	0.00593	4.04	427	438
AT4G24100.1	| Symbols: | Protein kinase superfamily protein | chr4:12515223-12519336 FORWARD LENGTH=709	APSFsGPLNLSTR	S5 Phospho	0	0	161.5	0.9987	50.99	30.96	2	1425.67	713.843	2	0.00631	4.42	497	509
AT2G34310.1	| Symbols: | unknown protein; FUNCTIONS IN: molecular_function unknown; INVOLVED IN: biological_process unknown; LOCATED IN: cellular_component unknown; EXPRESSED IN: 24 plant structures; EXPRESSED DURING: 13 growth stages; BEST Arabidopsis thaliana protein match is: unknown protein (TAIR:AT1G29530.1); Has 1236 Blast hits to 680 proteins in 89 species: Archae - 0; Bacteria - 0; Metazoa - 473; Fun…	DPsPPPLSSLGK	S3 Phospho	1	107.02	139.64	1	48.71	29.75	2	1273.6	637.807	2	0.00355	2.78	65	76
AT2G34310.1	| Symbols: | unknown protein; FUNCTIONS IN: molecular_function unknown; INVOLVED IN: biological_process unknown; LOCATED IN: cellular_component unknown; EXPRESSED IN: 24 plant structures; EXPRESSED DURING: 13 growth stages; BEST Arabidopsis thaliana protein match is: unknown protein (TAIR:AT1G29530.1); Has 1236 Blast hits to 680 proteins in 89 species: Archae - 0; Bacteria - 0; Metazoa - 473; Fun…	SDEKEEILsPR	S9 Phospho	1	187.62	159.97	0.9992	20.41	30.24	2	1381.62	691.815	2	0.00313	2.26	179	189
AT2G34310.1	| Symbols: | unknown protein; FUNCTIONS IN: molecular_function unknown; INVOLVED IN: biological_process unknown; LOCATED IN: cellular_component unknown; EXPRESSED IN: 24 plant structures; EXPRESSED DURING: 13 growth stages; BEST Arabidopsis thaliana protein match is: unknown protein (TAIR:AT1G29530.1); Has 1236 Blast hits to 680 proteins in 89 species: Archae - 0; Bacteria - 0; Metazoa - 473; Fun…	DSDGNLSsPGSQGNEEFGTR	S8 Phospho	0.49	0	129.06	0.9936	21.68	30.63	2	2132.84	1067.43	2	0.0118	5.55	45	64
AT2G29210.1	| Symbols: | splicing factor PWI domain-containing protein | chr2:12558156-12562168 FORWARD LENGTH=878	LPsPPVAQR	S3 Phospho	1	1000	125.73	0.9996	31.09	29.26	2	1043.52	522.768	2	0.00441	4.22	451	459
AT2G29210.1	| Symbols: | splicing factor PWI domain-containing protein | chr2:12558156-12562168 FORWARD LENGTH=878	AGLPsPPPAQR	S5 Phospho	1	1000	95.59	0.9994	20.32	29.61	2	1169.56	585.789	2	0.00429	3.66	468	478
AT2G29210.1	| Symbols: | splicing factor PWI domain-containing protein | chr2:12558156-12562168 FORWARD LENGTH=878	LPsPSIEQR	S3 Phospho	1	50.64	110.89	0.9536	11.02	29.04	2	1105.52	553.769	2	0.00617	5.57	442	450
AT2G29210.1	| Symbols: | splicing factor PWI domain-containing protein | chr2:12558156-12562168 FORWARD LENGTH=878	RAGLPsPPPAQR	S6 Phospho	1	1000	122.47	0.9988	15.45	30.21	2	1325.66	663.839	2	0.00363	2.73	467	478
AT1G70770.1	| Symbols: | Protein of unknown function DUF2359, transmembrane | chr1:26688622-26691185 REVERSE LENGTH=610	SNGYGDDGYDFDGsDDEIATLK	S14 Phospho	0.95	17.99	96.59	1	46.13	30.26	2	2432.93	1217.47	2	0.0118	4.87	99	120
AT1G70770.1	| Symbols: | Protein of unknown function DUF2359, transmembrane | chr1:26688622-26691185 REVERSE LENGTH=610	MTAIDsDDDGVVR	S6 Phospho	1	147.48	190.61	1	33.67	29.48	2	1472.59	737.304	2	0.00819	5.56	82	94
AT1G10290.1	| Symbols: ADL6, DRP2A | dynamin-like protein 6 | chr1:3370774-3377120 FORWARD LENGTH=914	AAAASSYSDNSGTESsPR	S16 Phospho	1	24.95	239.39	0.9989	50.49	29.95	2	1836.72	613.248	3	0.00591	3.22	822	839
AT1G10290.1	| Symbols: ADL6, DRP2A | dynamin-like protein 6 | chr1:3370774-3377120 FORWARD LENGTH=914	ATsPQPDGPTAGGSLK	S3 Phospho	1	23.98	228.87	0.9979	50.18	31.14	2	1562.7	782.358	2	0.00311	1.99	531	546
AT1G10290.1	| Symbols: ADL6, DRP2A | dynamin-like protein 6 | chr1:3370774-3377120 FORWARD LENGTH=914	YSDPAQNGDAAsPGSGSNR	S12 Phospho	1	70.88	187.1	1	54.07	29.93	2	1929.76	965.885	2	0.00653	3.38	876	894
AT1G10290.1	| Symbols: ADL6, DRP2A | dynamin-like protein 6 | chr1:3370774-3377120 FORWARD LENGTH=914	QSLsEGSLDK	S4 Phospho	1	50.64	156.67	1	72.29	29.21	2	1142.49	572.252	2	0.00389	3.4	709	718
AT1G10290.1	| Symbols: ADL6, DRP2A | dynamin-like protein 6 | chr1:3370774-3377120 FORWARD LENGTH=914	QLsIHDNR	S3 Phospho	1	1000	114.23	0.99	29.72	28.89	2	1061.47	531.742	2	0.00381	3.58	814	821
AT1G10290.1	| Symbols: ADL6, DRP2A | dynamin-like protein 6 | chr1:3370774-3377120 FORWARD LENGTH=914	RYsDPAQNGDAASPGSGSNR	S3 Phospho	0.99	20.19	146.77	0.9944	24.54	31.48	2	2085.86	696.294	3	0.0112	5.37	875	894
AT4G27430.1	| Symbols: CIP7 | COP1-interacting protein 7 | chr4:13718817-13722736 FORWARD LENGTH=1058	DNDsEPEELLR	S4 Phospho	1	1000	90.09	0.9919	12.76	29.1	2	1395.56	698.79	2	0.00897	6.42	474	484
AT4G27430.1	| Symbols: CIP7 | COP1-interacting protein 7 | chr4:13718817-13722736 FORWARD LENGTH=1058	HYSEDVGEVQASQEKPVsPK	S18 Phospho	1	37.58	253.59	0.9974	39.19	32.64	2	2293.03	765.35	3	0.00245	1.07	975	994
AT4G27430.1	| Symbols: CIP7 | COP1-interacting protein 7 | chr4:13718817-13722736 FORWARD LENGTH=1058	WNSEETsPK	S7 Phospho	1	26.2	144.36	0.9987	21.98	27.05	2	1156.45	579.232	2	0.00493	4.26	1034	1042
AT4G27430.1	| Symbols: CIP7 | COP1-interacting protein 7 | chr4:13718817-13722736 FORWARD LENGTH=1058	QVDALPAVAsVDDFK	S10 Phospho	1	1000	89.77	0.9894	11.64	31.46	2	1653.77	827.894	2	0.00801	4.84	906	920
AT1G59610.1	| Symbols: ADL3, CF1, DRP2B, DL3 | dynamin-like 3 | chr1:21893413-21900780 FORWARD LENGTH=920	ATsPQPDGPSSTGGSLK	S3 Phospho	0.5	0	218.44	0.9986	47.09	31.29	2	1665.73	833.873	2	0.00651	3.9	531	547
AT1G59610.1	| Symbols: ADL3, CF1, DRP2B, DL3 | dynamin-like 3 | chr1:21893413-21900780 FORWARD LENGTH=920	AAAASSWSDNSGTESsPR	S16 Phospho	1	27.96	424.91	0.9988	115.1	30.1	2	1859.74	930.875	2	0.00413	2.22	829	846
AT1G59610.1	| Symbols: ADL3, CF1, DRP2B, DL3 | dynamin-like 3 | chr1:21893413-21900780 FORWARD LENGTH=920	AAAASSWSDNSGTEsSPR	S15 Phospho	0.49	0	213.77	0.9932	32.05	29.87	2	1859.73	930.874	2	0.000548	0.295	829	846
AT1G59610.1	| Symbols: ADL3, CF1, DRP2B, DL3 | dynamin-like 3 | chr1:21893413-21900780 FORWARD LENGTH=920	RYsDPAQNGEDSSGSGGSSR	S3 Phospho	1	24.95	67.87	0.9979	17.64	30.09	2	2092.81	1047.41	2	0.00325	1.55	881	900
AT1G59610.1	| Symbols: ADL3, CF1, DRP2B, DL3 | dynamin-like 3 | chr1:21893413-21900780 FORWARD LENGTH=920	AtSPQPDGPSSTGGSLK	T2 Phospho	0.01	0	213.56	0.9986	60.43	31.29	2	1665.73	833.873	2	0.00647	3.88	531	547
AT1G11360.1	| Symbols: | Adenine nucleotide alpha hydrolases-like superfamily protein | chr1:3822171-3822899 REVERSE LENGTH=242	KSPTVVTVQPSsPR	S12 Phospho	0.99	21.43	310.95	0.9988	57.22	30.5	2	1561.79	781.904	2	0.00681	4.36	13	26
AT1G11360.1	| Symbols: | Adenine nucleotide alpha hydrolases-like superfamily protein | chr1:3822171-3822899 REVERSE LENGTH=242	SPTVVTVQPSsPR	S11 Phospho	0.5	0	292.89	0.9987	73.25	30.35	2	1433.7	717.856	2	0.00553	3.85	14	26
AT1G11360.1	| Symbols: | Adenine nucleotide alpha hydrolases-like superfamily protein | chr1:3822171-3822899 REVERSE LENGTH=242	FPIStPTAGAQR	T5 Phospho	1	27.96	174.54	0.9953	28.99	30.58	2	1324.62	663.319	2	0.00661	4.98	27	38
AT2G43680.2	| Symbols: IQD14 | IQ-domain 14 | chr2:18109302-18111587 FORWARD LENGTH=668	GASPQAISSKPPsPR	S13 Phospho	1	29.73	77.14	0.9704	13.79	30.97	2	1558.76	520.593	3	0.00636	4.08	204	218
AT2G43680.2	| Symbols: IQD14 | IQ-domain 14 | chr2:18109302-18111587 FORWARD LENGTH=668	GPGsPGGVVLEK	S4 Phospho	1	1000	226.57	1	65.5	29.98	2	1175.57	588.79	2	0.00619	5.26	626	637
AT2G43680.2	| Symbols: IQD14 | IQ-domain 14 | chr2:18109302-18111587 FORWARD LENGTH=668	QNPLAsPAPSYSQPQR	S6 Phospho	1	43.97	134.5	0.9991	29.44	32.5	2	1819.83	910.922	2	0.00395	2.17	471	486
AT2G43680.2	| Symbols: IQD14 | IQ-domain 14 | chr2:18109302-18111587 FORWARD LENGTH=668	AEPPTLDTPRPPsPR	S13 Phospho	1	84.78	164.74	0.9953	23.01	31.15	2	1709.82	855.919	2	0.00875	5.11	219	233
AT2G43680.2	| Symbols: IQD14 | IQ-domain 14 | chr2:18109302-18111587 FORWARD LENGTH=668	TLSPKPPsPR	S8 Phospho	1	63.12	101.9	0.9593	11.77	29.68	2	1158.58	580.3	2	0.00457	3.94	125	134
AT2G43680.2	| Symbols: IQD14 | IQ-domain 14 | chr2:18109302-18111587 FORWARD LENGTH=668	SLSPKPPsPR	S8 Phospho	1	23.99	71.97	0.9416	10.86	29.25	2	1144.57	573.292	2	0.00415	3.62	140	149
AT2G43680.2	| Symbols: IQD14 | IQ-domain 14 | chr2:18109302-18111587 FORWARD LENGTH=668	LcPsPLSQSSK	S4 Phospho	1	60.34	109.95	0.9985	13.83	29.69	2	1282.57	642.291	2	0.00356	2.78	495	505
AT3G20250.1	| Symbols: APUM5, PUM5 | pumilio 5 | chr3:7059098-7062660 REVERSE LENGTH=961	QASHEDNNLSVFGAsPPSSVASR	S15 Phospho	1	64.24	109.49	0.9808	10.85	32.53	2	2436.08	813.034	3	0.0084	3.45	289	311
AT3G20250.1	| Symbols: APUM5, PUM5 | pumilio 5 | chr3:7059098-7062660 REVERSE LENGTH=961	AIENYDsEEEIR	S7 Phospho	1	50.64	203.46	1	51.44	29.71	2	1546.62	774.319	2	0.00425	2.74	92	103
AT1G15400.2	| Symbols: | unknown protein; FUNCTIONS IN: molecular_function unknown; INVOLVED IN: biological_process unknown; LOCATED IN: plasma membrane; EXPRESSED IN: 23 plant structures; EXPRESSED DURING: 13 growth stages; BEST Arabidopsis thaliana protein match is: unknown protein (TAIR:AT1G80180.1); Has 82 Blast hits to 82 proteins in 16 species: Archae - 0; Bacteria - 4; Metazoa - 0; Fungi - 0; Plants -…	VSPAVDPPsPR	S9 Phospho	1	249.61	235.44	1	59.12	30.02	2	1200.56	601.286	2	0.00345	2.87	99	109
AT1G15400.2	| Symbols: | unknown protein; FUNCTIONS IN: molecular_function unknown; INVOLVED IN: biological_process unknown; LOCATED IN: plasma membrane; EXPRESSED IN: 23 plant structures; EXPRESSED DURING: 13 growth stages; BEST Arabidopsis thaliana protein match is: unknown protein (TAIR:AT1G80180.1); Has 82 Blast hits to 82 proteins in 16 species: Archae - 0; Bacteria - 4; Metazoa - 0; Fungi - 0; Plants -…	QGsSGIVFDDR	S3 Phospho	1	30.97	189.3	1	76.15	28.83	2	1259.52	630.77	2	0.00601	4.77	14	24
AT1G15400.2	| Symbols: | unknown protein; FUNCTIONS IN: molecular_function unknown; INVOLVED IN: biological_process unknown; LOCATED IN: plasma membrane; EXPRESSED IN: 23 plant structures; EXPRESSED DURING: 13 growth stages; BEST Arabidopsis thaliana protein match is: unknown protein (TAIR:AT1G80180.1); Has 82 Blast hits to 82 proteins in 16 species: Archae - 0; Bacteria - 4; Metazoa - 0; Fungi - 0; Plants -…	RQGsSGIVFDDR	S4 Phospho	1	26.2	147.29	0.9194	12.7	30.35	2	1415.62	708.818	2	0.00231	1.63	13	24
AT1G15400.2	| Symbols: | unknown protein; FUNCTIONS IN: molecular_function unknown; INVOLVED IN: biological_process unknown; LOCATED IN: plasma membrane; EXPRESSED IN: 23 plant structures; EXPRESSED DURING: 13 growth stages; BEST Arabidopsis thaliana protein match is: unknown protein (TAIR:AT1G80180.1); Has 82 Blast hits to 82 proteins in 16 species: Archae - 0; Bacteria - 4; Metazoa - 0; Fungi - 0; Plants -…	QGSsGIVFDDR	S4 Phospho	0.5	0	136.55	0.9789	36.02	27.65	2	1259.5	630.758	2	-0.0177	-14	14	24
AT4G22670.1	| Symbols: AtHip1, HIP1, TPR11 | HSP70-interacting protein 1 | chr4:11918236-11920671 FORWARD LENGTH=441	VEEEEEEDEIVEsDVELEGDTVEPDNDPPQK	S13 Phospho	1	18.95	102.85	0.9964	22.85	33.05	2	3621.49	1208.17	3	0.0122	3.36	77	107
AT4G22670.1	| Symbols: AtHip1, HIP1, TPR11 | HSP70-interacting protein 1 | chr4:11918236-11920671 FORWARD LENGTH=441	VEEEEEEDEIVESDVELEGDtVEPDNDPPQK	T21 Phospho	0.5	0	42.42	0.9514	14.49	32.99	2	3621.49	1208.17	3	0.011	3.03	77	107
AT3G61860.1	| Symbols: ATRSP31, RSP31, At-RS31, RS31 | RNA-binding (RRM/RBD/RNP motifs) family protein | chr3:22900311-22902159 REVERSE LENGTH=264	RPsPDYGR	S3 Phospho	1	74.63	133.37	0.99	18.71	28.01	2	1026.43	514.223	2	0.00359	3.49	189	196
AT3G61860.1	| Symbols: ATRSP31, RSP31, At-RS31, RS31 | RNA-binding (RRM/RBD/RNP motifs) family protein | chr3:22900311-22902159 REVERSE LENGTH=264	RRPsPDYGR	S4 Phospho	1	64.24	69.57	0.9951	12.73	30.02	2	1182.53	395.185	3	0.00264	2.23	188	196
AT1G29400.2	| Symbols: AML5, ML5 | MEI2-like protein 5 | chr1:10290393-10293696 REVERSE LENGTH=800	sPVFGLSPTR	S1 Phospho	1	145.71	156.27	1	36.37	30.41	2	1139.54	570.778	2	0.00405	3.55	384	393
AT1G29400.2	| Symbols: AML5, ML5 | MEI2-like protein 5 | chr1:10290393-10293696 REVERSE LENGTH=800	SPVFGLsPTR	S7 Phospho	1	27.96	109.06	0.9392	11.89	30.36	2	1139.54	570.779	2	0.00585	5.13	384	393
AT1G29400.2	| Symbols: AML5, ML5 | MEI2-like protein 5 | chr1:10290393-10293696 REVERSE LENGTH=800	DGFsLIDDTAVSR	S4 Phospho	1	122.05	163.49	1	66.99	30.38	2	1474.64	738.327	2	0.00575	3.9	50	62
AT2G29140.1	| Symbols: APUM3, PUM3 | pumilio 3 | chr2:12531392-12535060 FORWARD LENGTH=964	VPsPcLTPIGSGR	S3 Phospho	1	171.35	250.03	1	53.77	30.1	2	1419.66	710.839	2	0.00466	3.28	266	278
AT2G29140.1	| Symbols: APUM3, PUM3 | pumilio 3 | chr2:12531392-12535060 FORWARD LENGTH=964	NGtPDPQGIAR	T3 Phospho	1	1000	146.66	1	34.4	29.73	2	1204.53	603.272	2	0.00595	4.93	255	265
AT1G08680.2	| Symbols: ZIGA4 | ARF GAP-like zinc finger-containing protein ZIGA4 | chr1:2762820-2768387 FORWARD LENGTH=648	ASsFVYSPGR	S3 Phospho	1	26.2	122.91	0.9989	35.04	29.09	2	1149.49	575.753	2	0.00521	4.53	190	199
AT1G08680.2	| Symbols: ZIGA4 | ARF GAP-like zinc finger-containing protein ZIGA4 | chr1:2762820-2768387 FORWARD LENGTH=648	ASDySVSSAGDPFR	Y4 Phospho	0	0	117.69	0.9543	12.43	28.74	2	1537.61	769.814	2	0.00551	3.58	218	231
AT1G08680.2	| Symbols: ZIGA4 | ARF GAP-like zinc finger-containing protein ZIGA4 | chr1:2762820-2768387 FORWARD LENGTH=648	ASDYSVSsAGDPFR	S8 Phospho	0.99	24.95	125.78	0.9987	33.93	28.74	2	1537.61	769.814	2	0.00549	3.57	218	231
AT1G08680.2	| Symbols: ZIGA4 | ARF GAP-like zinc finger-containing protein ZIGA4 | chr1:2762820-2768387 FORWARD LENGTH=648	ASSFVYsPGR	S7 Phospho	1	30.97	144.6	1	32.89	29.09	2	1149.49	575.752	2	0.00423	3.67	190	199
AT1G08680.2	| Symbols: ZIGA4 | ARF GAP-like zinc finger-containing protein ZIGA4 | chr1:2762820-2768387 FORWARD LENGTH=648	SDIQsPNFQQEAEFR	S5 Phospho	1	39.21	241.5	1	102.3	31.25	2	1874.79	938.404	2	0.00933	4.97	232	246
AT1G08680.2	| Symbols: ZIGA4 | ARF GAP-like zinc finger-containing protein ZIGA4 | chr1:2762820-2768387 FORWARD LENGTH=648	sDIQSPNFQQEAEFR	S1 Phospho	0.02	0	160.32	0.9986	46.55	31.16	2	1874.79	938.402	2	0.00571	3.04	232	246
AT1G08680.2	| Symbols: ZIGA4 | ARF GAP-like zinc finger-containing protein ZIGA4 | chr1:2762820-2768387 FORWARD LENGTH=648	AsDYSVSSAGDPFR	S2 Phospho	0.01	0	145.91	0.9957	19.58	28.81	2	1537.61	769.814	2	0.00465	3.02	218	231
AT2G29190.1	| Symbols: APUM2, PUM2 | pumilio 2 | chr2:12544260-12548071 REVERSE LENGTH=972	NGtPDPQAIAR	T3 Phospho	1	1000	95.94	0.9979	14.72	29.51	2	1218.54	610.278	2	0.00201	1.65	267	277
AT5G04420.1	| Symbols: | Galactose oxidase/kelch repeat superfamily protein | chr5:1246867-1249455 REVERSE LENGTH=514	SAsDEEEDGTVQR	S3 Phospho	1	26.2	251.95	0.9996	90.77	27.99	2	1501.56	751.788	2	0.00521	3.47	490	502
AT5G04420.1	| Symbols: | Galactose oxidase/kelch repeat superfamily protein | chr5:1246867-1249455 REVERSE LENGTH=514	TESSsADNIQEDDGSSLR	S5 Phospho	0.25	0	145.12	0.9953	19.73	30.82	2	1989.79	664.27	3	0.00815	4.09	79	96
AT5G04420.1	| Symbols: | Galactose oxidase/kelch repeat superfamily protein | chr5:1246867-1249455 REVERSE LENGTH=514	LKTESSsADNIQEDDGSSLR	S7 Phospho	0.25	0	145.96	0.998	39.54	32.27	2	2230.97	1116.49	2	0.00895	4.01	77	96
AT2G07360.1	| Symbols: | SH3 domain-containing protein | chr2:3047623-3057099 REVERSE LENGTH=1196	SYEsDDEEPR	S4 Phospho	0.99	23.2	139.71	1	48.04	25.31	2	1305.45	653.73	2	0.00525	4.02	1122	1131
AT2G07360.1	| Symbols: | SH3 domain-containing protein | chr2:3047623-3057099 REVERSE LENGTH=1196	TSsISAGPGR	S3 Phospho	1	54.16	134.79	0.999	38.99	28.43	2	1011.44	506.729	2	0.00433	4.27	539	548
AT2G07360.1	| Symbols: | SH3 domain-containing protein | chr2:3047623-3057099 REVERSE LENGTH=1196	YQSTYEGYGsPIR	S10 Phospho	0.5	0	174.1	0.9989	36.65	30.49	2	1599.67	800.84	2	0.00461	2.88	1081	1093
AT2G07360.1	| Symbols: | SH3 domain-containing protein | chr2:3047623-3057099 REVERSE LENGTH=1196	EsFENPVAGSGSR	S2 Phospho	1	146.81	121.12	1	32.45	29.19	2	1415.57	708.794	2	0.00119	0.839	1109	1121
AT2G07360.1	| Symbols: | SH3 domain-containing protein | chr2:3047623-3057099 REVERSE LENGTH=1196	SYEsDDEEPRK	S4 Phospho	1	72.58	99.27	0.9576	11.07	27.15	2	1433.54	717.775	2	0.000848	0.591	1122	1132
AT2G07360.1	| Symbols: | SH3 domain-containing protein | chr2:3047623-3057099 REVERSE LENGTH=1196	YQSTYEGYGsPIREEPPPPYSYSEPQSR	S10 Phospho	0.2	0	108.38	0.9749	16.74	33.45	2	3343.45	1115.49	3	0.0119	3.55	1081	1108
AT2G07360.1	| Symbols: | SH3 domain-containing protein | chr2:3047623-3057099 REVERSE LENGTH=1196	RTSsISAGPGR	S4 Phospho	1	23.19	155.34	0.9961	29.13	30.05	2	1167.54	584.779	2	0.00357	3.05	538	548
AT1G59870.1	| Symbols: PEN3, PDR8, ATPDR8, ABCG36, ATABCG36 | ABC-2 and Plant PDR ABC-type transporter family protein | chr1:22034661-22039844 FORWARD LENGTH=1469	NIEDIFSSGsR	S10 Phospho	0.33	0	227.43	0.999	45.34	29.39	2	1303.55	652.782	2	0.00561	4.3	31	41
AT1G59870.1	| Symbols: PEN3, PDR8, ATPDR8, ABCG36, ATABCG36 | ABC-2 and Plant PDR ABC-type transporter family protein | chr1:22034661-22039844 FORWARD LENGTH=1469	SLsTADGNR	S3 Phospho	1	51.06	157.58	0.9983	43.19	26.36	2	999.405	500.71	2	0.00235	2.35	823	831
AT1G59870.1	| Symbols: PEN3, PDR8, ATPDR8, ABCG36, ATABCG36 | ABC-2 and Plant PDR ABC-type transporter family protein | chr1:22034661-22039844 FORWARD LENGTH=1469	TQsVNDDEEALK	S3 Phospho	1	46.21	191.2	0.9989	31.13	29.55	2	1427.59	714.801	2	0.00581	4.07	43	54
AT1G59870.1	| Symbols: PEN3, PDR8, ATPDR8, ABCG36, ATABCG36 | ABC-2 and Plant PDR ABC-type transporter family protein | chr1:22034661-22039844 FORWARD LENGTH=1469	NIEDIFSSGsRR	S10 Phospho	0.33	0	87.57	0.9275	12.28	30.59	2	1459.65	730.832	2	0.00357	2.44	31	42
AT1G59870.1	| Symbols: PEN3, PDR8, ATPDR8, ABCG36, ATABCG36 | ABC-2 and Plant PDR ABC-type transporter family protein | chr1:22034661-22039844 FORWARD LENGTH=1469	sLSTADGNR	S1 Phospho	1	27.96	120.15	0.9989	30.66	26.48	2	999.405	500.71	2	0.00313	3.13	823	831
AT1G59870.1	| Symbols: PEN3, PDR8, ATPDR8, ABCG36, ATABCG36 | ABC-2 and Plant PDR ABC-type transporter family protein | chr1:22034661-22039844 FORWARD LENGTH=1469	RTQsVNDDEEALK	S4 Phospho	0.99	21.95	148.71	0.9947	19.58	30.71	2	1583.69	792.853	2	0.00745	4.7	42	54
AT1G15750.3	| Symbols: WSIP1, TPL | Transducin family protein / WD-40 repeat family protein | chr1:5415086-5420359 REVERSE LENGTH=1131	APsPVNNPLLGGIPK	S3 Phospho	1	1000	449.13	0.9992	101.4	29.37	2	1552.81	777.412	2	0.00709	4.56	212	226
AT1G15750.3	| Symbols: WSIP1, TPL | Transducin family protein / WD-40 repeat family protein | chr1:5415086-5420359 REVERSE LENGTH=1131	tPPTNASLDYPSADSEHVSK	T1 Phospho	1	26.2	186.18	0.9987	53.47	32.08	2	2194.95	1098.48	2	0.0107	4.89	286	305
AT3G05420.2	| Symbols: ACBP4 | acyl-CoA binding protein 4 | chr3:1561880-1567047 FORWARD LENGTH=669	DIEsEVEVSQEGR	S4 Phospho	1	207.15	318.26	1	81.52	30.3	2	1555.65	778.832	2	0.00807	5.18	513	525
AT3G05420.2	| Symbols: ACBP4 | acyl-CoA binding protein 4 | chr3:1561880-1567047 FORWARD LENGTH=669	ATsGPAYPER	S3 Phospho	1	58.42	162.02	0.9987	39.85	28.31	2	1127.47	564.743	2	0.00575	5.09	6	15
AT3G05420.2	| Symbols: ACBP4 | acyl-CoA binding protein 4 | chr3:1561880-1567047 FORWARD LENGTH=669	TLEAPLPGsLSAVNNATTR	S9 Phospho	1	60.18	273.47	1	69.45	31.45	2	1990.98	996.496	2	0.00525	2.63	494	512
AT3G05420.2	| Symbols: ACBP4 | acyl-CoA binding protein 4 | chr3:1561880-1567047 FORWARD LENGTH=669	TLEAPLPGSLsAVNNATTR	S11 Phospho	0.99	24.95	264.21	0.9989	51.34	31.43	2	1990.98	996.497	2	0.00737	3.7	494	512
AT1G42550.1	| Symbols: PMI1 | plastid movement impaired1 | chr1:15977131-15979734 FORWARD LENGTH=843	SGEsVDDESENYLSDLGK	S4 Phospho	1	48.43	304.56	0.9965	112.6	30.48	2	2022.8	1012.41	2	0.00895	4.42	504	521
AT1G42550.1	| Symbols: PMI1 | plastid movement impaired1 | chr1:15977131-15979734 FORWARD LENGTH=843	NFANsFGR	S5 Phospho	1	1000	105.49	0.99	18.87	28.04	2	991.393	496.704	2	0.00167	1.68	310	317
AT1G42550.1	| Symbols: PMI1 | plastid movement impaired1 | chr1:15977131-15979734 FORWARD LENGTH=843	TNsLALPR	S3 Phospho	1	50.64	152.82	0.99	48.65	28.44	2	950.46	476.237	2	0.00119	1.25	39	46
AT1G42550.1	| Symbols: PMI1 | plastid movement impaired1 | chr1:15977131-15979734 FORWARD LENGTH=843	TSFSVPsPK	S7 Phospho	1	40.66	140.86	0.9962	24.28	33.15	2	1028.46	515.24	2	0.00683	6.63	322	330
AT3G05900.1	| Symbols: | neurofilament protein-related | chr3:1761408-1763854 REVERSE LENGTH=673	YVVDEPSKDETTsESGSALcPEK	S13 Phospho	0.25	0	228.9	0.998	60.65	33.05	2	2607.1	870.042	3	0.0107	4.09	412	434
AT3G05900.1	| Symbols: | neurofilament protein-related | chr3:1761408-1763854 REVERSE LENGTH=673	VVPTNQDsDTEPKK	S8 Phospho	0.99	21.95	74.53	0.9736	11.78	31.39	2	1636.74	819.378	2	0.00609	3.72	493	506
AT3G05900.1	| Symbols: | neurofilament protein-related | chr3:1761408-1763854 REVERSE LENGTH=673	TSESGSALsPEK	S9 Phospho	1	74.63	206.3	1	60.69	29.53	2	1271.53	636.774	2	0.00519	4.08	481	492
AT3G05900.1	| Symbols: | neurofilament protein-related | chr3:1761408-1763854 REVERSE LENGTH=673	TsESGSALSPEK	S2 Phospho	0.33	0	134.03	0.9951	23.72	29.48	2	1271.53	636.773	2	0.00307	2.41	481	492
AT3G05900.1	| Symbols: | neurofilament protein-related | chr3:1761408-1763854 REVERSE LENGTH=673	KETEEDVSsPADIIEK	S9 Phospho	0.33	0	161.64	0.9921	19.04	31.87	2	1868.84	935.425	2	0.00633	3.38	448	463
AT3G05900.1	| Symbols: | neurofilament protein-related | chr3:1761408-1763854 REVERSE LENGTH=673	VVPTNQDsDTEPK	S8 Phospho	1	47.48	150.44	0.9996	34.9	30.57	2	1508.65	755.331	2	0.00691	4.58	493	505
AT3G48050.2	| Symbols: | BAH domain ;TFIIS helical bundle-like domain | chr3:17734270-17739412 REVERSE LENGTH=1613	SAPsPGSGGNVSK	S4 Phospho	1	44.18	102.84	0.9989	23.29	29.19	2	1223.52	612.768	2	0.00389	3.18	478	490
AT3G48050.2	| Symbols: | BAH domain ;TFIIS helical bundle-like domain | chr3:17734270-17739412 REVERSE LENGTH=1613	GRsPAQSVSGGSLEDPAPVNSR	S3 Phospho	1	49.22	247.93	0.9956	27.11	32.54	2	2247.03	750.019	3	0.00589	2.62	629	650
AT3G48050.2	| Symbols: | BAH domain ;TFIIS helical bundle-like domain | chr3:17734270-17739412 REVERSE LENGTH=1613	SNNVFQGSSSSAsPR	S13 Phospho	1	32.43	214.11	0.997	25.85	29.78	2	1603.67	802.84	2	0.00369	2.3	565	579
AT3G48050.2	| Symbols: | BAH domain ;TFIIS helical bundle-like domain | chr3:17734270-17739412 REVERSE LENGTH=1613	ILNDSDsGELKDIK	S7 Phospho	0.99	20.98	198.19	0.9813	36.23	31.12	2	1625.73	813.871	2	-0.028	-17.2	906	919
AT3G48050.2	| Symbols: | BAH domain ;TFIIS helical bundle-like domain | chr3:17734270-17739412 REVERSE LENGTH=1613	DILTGSQEAAGsPLVAGDER	S12 Phospho	1	43.77	178.54	1	40.07	32.39	2	2064.95	1033.48	2	0.01	4.86	694	713
AT3G48050.2	| Symbols: | BAH domain ;TFIIS helical bundle-like domain | chr3:17734270-17739412 REVERSE LENGTH=1613	VSsPVHAVK	S3 Phospho	1	24.95	92.57	0.9962	18	28.76	2	1002.49	502.254	2	0.00317	3.16	651	659
AT3G48050.2	| Symbols: | BAH domain ;TFIIS helical bundle-like domain | chr3:17734270-17739412 REVERSE LENGTH=1613	SSNsDTEDLQR	S4 Phospho	1	54.16	219.63	1	54.7	27.65	2	1330.51	666.261	2	0.00417	3.13	866	876
AT3G48050.2	| Symbols: | BAH domain ;TFIIS helical bundle-like domain | chr3:17734270-17739412 REVERSE LENGTH=1613	ILNDSDsGELK	S7 Phospho	0.5	0	145.56	0.9987	36.38	29.57	2	1269.56	635.785	2	0.00619	4.87	906	916
AT3G48050.2	| Symbols: | BAH domain ;TFIIS helical bundle-like domain | chr3:17734270-17739412 REVERSE LENGTH=1613	TSDADGDEAGEcTsAAR	S14 Phospho	0.5	0	163.01	0.9963	23.29	27.19	2	1791.63	896.823	2	0.00674	3.76	1096	1112
AT3G48050.2	| Symbols: | BAH domain ;TFIIS helical bundle-like domain | chr3:17734270-17739412 REVERSE LENGTH=1613	KSNNVFQGSSSSAsPR	S14 Phospho	0.01	0	168.65	0.9985	37.03	31.32	2	1731.76	578.262	3	0.00645	3.72	564	579
AT3G48050.2	| Symbols: | BAH domain ;TFIIS helical bundle-like domain | chr3:17734270-17739412 REVERSE LENGTH=1613	DTSAGLDSSVtK	T11 Phospho	0.33	0	98.34	0.9318	10.28	29.03	2	1259.53	630.774	2	0.00501	3.97	1041	1052
AT3G48050.2	| Symbols: | BAH domain ;TFIIS helical bundle-like domain | chr3:17734270-17739412 REVERSE LENGTH=1613	cVATsPGSTR	S5 Phospho	1	24.95	136.66	0.9964	19.99	27.97	2	1114.45	558.233	2	0.00452	4.05	468	477
AT3G48050.2	| Symbols: | BAH domain ;TFIIS helical bundle-like domain | chr3:17734270-17739412 REVERSE LENGTH=1613	TsDADGDEAGEcTSAAR	S2 Phospho	0.5	0	167.06	0.9983	37.16	29.49	2	1791.63	896.822	2	0.00468	2.61	1096	1112
AT4G31880.1	| Symbols: | LOCATED IN: cytosol, chloroplast; EXPRESSED IN: 24 plant structures; EXPRESSED DURING: 14 growth stages; BEST Arabidopsis thaliana protein match is: Tudor/PWWP/MBT superfamily protein (TAIR:AT1G15940.1); Has 137162 Blast hits to 70781 proteins in 2973 species: Archae - 289; Bacteria - 24182; Metazoa - 56725; Fungi - 20130; Plants - 6559; Viruses - 758; Other Eukaryotes - 28519 (sourc…	ESSTEEVKPSASIATEEVsEEPNTSEPQVTK	S19 Phospho	1	21.95	144.86	0.9961	25.66	33.25	2	3398.52	1133.85	3	0.00917	2.7	459	489
AT4G31880.1	| Symbols: | LOCATED IN: cytosol, chloroplast; EXPRESSED IN: 24 plant structures; EXPRESSED DURING: 14 growth stages; BEST Arabidopsis thaliana protein match is: Tudor/PWWP/MBT superfamily protein (TAIR:AT1G15940.1); Has 137162 Blast hits to 70781 proteins in 2973 species: Archae - 289; Bacteria - 24182; Metazoa - 56725; Fungi - 20130; Plants - 6559; Viruses - 758; Other Eukaryotes - 28519 (sourc…	QTVEEsPNSNTK	S6 Phospho	1	74.63	206.67	1	80.31	29.49	2	1412.59	707.301	2	0.00565	4	582	593
AT4G31880.1	| Symbols: | LOCATED IN: cytosol, chloroplast; EXPRESSED IN: 24 plant structures; EXPRESSED DURING: 14 growth stages; BEST Arabidopsis thaliana protein match is: Tudor/PWWP/MBT superfamily protein (TAIR:AT1G15940.1); Has 137162 Blast hits to 70781 proteins in 2973 species: Archae - 289; Bacteria - 24182; Metazoa - 56725; Fungi - 20130; Plants - 6559; Viruses - 758; Other Eukaryotes - 28519 (sourc…	AAEIStPERTDAPK	T6 Phospho	0.5	0	251.27	0.9983	42.93	30.85	2	1564.72	783.366	2	0.00321	2.05	284	297
AT4G31880.1	| Symbols: | LOCATED IN: cytosol, chloroplast; EXPRESSED IN: 24 plant structures; EXPRESSED DURING: 14 growth stages; BEST Arabidopsis thaliana protein match is: Tudor/PWWP/MBT superfamily protein (TAIR:AT1G15940.1); Has 137162 Blast hits to 70781 proteins in 2973 species: Archae - 289; Bacteria - 24182; Metazoa - 56725; Fungi - 20130; Plants - 6559; Viruses - 758; Other Eukaryotes - 28519 (sourc…	DVLTSPPVDSSVTAATSsENEK	S18 Phospho	0.33	0	134.75	0.9886	18.62	32.55	2	2313.04	1157.52	2	0.00905	3.91	394	415
AT4G31880.1	| Symbols: | LOCATED IN: cytosol, chloroplast; EXPRESSED IN: 24 plant structures; EXPRESSED DURING: 14 growth stages; BEST Arabidopsis thaliana protein match is: Tudor/PWWP/MBT superfamily protein (TAIR:AT1G15940.1); Has 137162 Blast hits to 70781 proteins in 2973 species: Archae - 289; Bacteria - 24182; Metazoa - 56725; Fungi - 20130; Plants - 6559; Viruses - 758; Other Eukaryotes - 28519 (sourc…	WSPLDESELSQDEEAADQtGQEEDASTVPLTK	T19 Phospho	0.25	0	43.23	0.9523	15.51	33.32	2	3584.54	1195.85	3	0.0173	4.82	657	688
AT4G31880.1	| Symbols: | LOCATED IN: cytosol, chloroplast; EXPRESSED IN: 24 plant structures; EXPRESSED DURING: 14 growth stages; BEST Arabidopsis thaliana protein match is: Tudor/PWWP/MBT superfamily protein (TAIR:AT1G15940.1); Has 137162 Blast hits to 70781 proteins in 2973 species: Archae - 289; Bacteria - 24182; Metazoa - 56725; Fungi - 20130; Plants - 6559; Viruses - 758; Other Eukaryotes - 28519 (sourc…	AAEIStPER	T6 Phospho	0.5	0	173.05	0.9965	24.38	28.16	2	1052.46	527.237	2	0.00455	4.32	284	292
AT4G31880.1	| Symbols: | LOCATED IN: cytosol, chloroplast; EXPRESSED IN: 24 plant structures; EXPRESSED DURING: 14 growth stages; BEST Arabidopsis thaliana protein match is: Tudor/PWWP/MBT superfamily protein (TAIR:AT1G15940.1); Has 137162 Blast hits to 70781 proteins in 2973 species: Archae - 289; Bacteria - 24182; Metazoa - 56725; Fungi - 20130; Plants - 6559; Viruses - 758; Other Eukaryotes - 28519 (sourc…	AAEIStPERTDAPKDESGK	T6 Phospho	0.48	0	156.99	0.9865	18.05	32.51	2	2080.94	694.654	3	0.00736	3.54	284	302
AT4G31880.1	| Symbols: | LOCATED IN: cytosol, chloroplast; EXPRESSED IN: 24 plant structures; EXPRESSED DURING: 14 growth stages; BEST Arabidopsis thaliana protein match is: Tudor/PWWP/MBT superfamily protein (TAIR:AT1G15940.1); Has 137162 Blast hits to 70781 proteins in 2973 species: Archae - 289; Bacteria - 24182; Metazoa - 56725; Fungi - 20130; Plants - 6559; Viruses - 758; Other Eukaryotes - 28519 (sourc…	AIDEESLHTSsGDNEKPAVSSGK	S11 Phospho	0.33	0	210.49	0.9878	25.42	32.99	2	2437.07	813.363	3	0.00369	1.51	549	571
AT4G01290.2	| Symbols: | unknown protein; FUNCTIONS IN: molecular_function unknown; INVOLVED IN: biological_process unknown; LOCATED IN: cellular_component unknown; EXPRESSED IN: 24 plant structures; EXPRESSED DURING: 15 growth stages; Has 1797 Blast hits to 1352 proteins in 216 species: Archae - 0; Bacteria - 202; Metazoa - 850; Fungi - 267; Plants - 109; Viruses - 0; Other Eukaryotes - 369 (source: NCBI BL…	LSsISTPTEIQGYPIK	S3 Phospho	0.5	0	79.8	0.9462	13.04	31.04	2	1812.9	907.455	2	0.00499	2.75	403	418
AT4G01290.2	| Symbols: | unknown protein; FUNCTIONS IN: molecular_function unknown; INVOLVED IN: biological_process unknown; LOCATED IN: cellular_component unknown; EXPRESSED IN: 24 plant structures; EXPRESSED DURING: 15 growth stages; Has 1797 Blast hits to 1352 proteins in 216 species: Archae - 0; Bacteria - 202; Metazoa - 850; Fungi - 267; Plants - 109; Viruses - 0; Other Eukaryotes - 369 (source: NCBI BL…	NDYSSsPPTR	S6 Phospho	0.99	24.95	178.68	0.997	26	27.16	2	1202.47	602.241	2	0.00639	5.31	84	93
AT4G01290.2	| Symbols: | unknown protein; FUNCTIONS IN: molecular_function unknown; INVOLVED IN: biological_process unknown; LOCATED IN: cellular_component unknown; EXPRESSED IN: 24 plant structures; EXPRESSED DURING: 15 growth stages; Has 1797 Blast hits to 1352 proteins in 216 species: Archae - 0; Bacteria - 202; Metazoa - 850; Fungi - 267; Plants - 109; Viruses - 0; Other Eukaryotes - 369 (source: NCBI BL…	VEEIRsPQTINK	S6 Phospho	1	112.12	289.29	1	49.61	30.69	2	1492.73	747.374	2	0.00523	3.5	467	478
AT4G01290.2	| Symbols: | unknown protein; FUNCTIONS IN: molecular_function unknown; INVOLVED IN: biological_process unknown; LOCATED IN: cellular_component unknown; EXPRESSED IN: 24 plant structures; EXPRESSED DURING: 15 growth stages; Has 1797 Blast hits to 1352 proteins in 216 species: Archae - 0; Bacteria - 202; Metazoa - 850; Fungi - 267; Plants - 109; Viruses - 0; Other Eukaryotes - 369 (source: NCBI BL…	sLEHSDGPSILDK	S1 Phospho	1	66.42	164.44	1	65.6	30.95	2	1476.65	739.334	2	0.00443	3	431	443
AT4G01290.2	| Symbols: | unknown protein; FUNCTIONS IN: molecular_function unknown; INVOLVED IN: biological_process unknown; LOCATED IN: cellular_component unknown; EXPRESSED IN: 24 plant structures; EXPRESSED DURING: 15 growth stages; Has 1797 Blast hits to 1352 proteins in 216 species: Archae - 0; Bacteria - 202; Metazoa - 850; Fungi - 267; Plants - 109; Viruses - 0; Other Eukaryotes - 369 (source: NCBI BL…	RNDYSSsPPTR	S7 Phospho	0.25	0	52.81	0.9323	13.7	29.3	2	1358.57	680.292	2	0.00787	5.79	83	93
AT4G29440.2	| Symbols: | Regulator of Vps4 activity in the MVB pathway protein | chr4:14473942-14477683 REVERSE LENGTH=1062	ASPDQDsPPK	S7 Phospho	1	100.79	111.69	0.9852	15.03	28.82	2	1120.46	561.236	2	0.0128	11.4	921	930
AT4G29440.2	| Symbols: | Regulator of Vps4 activity in the MVB pathway protein | chr4:14473942-14477683 REVERSE LENGTH=1062	TQEEsDAETPTGLK	S5 Phospho	1	74.45	189.32	0.9995	37.72	34.43	2	1584.66	793.337	2	0.00351	2.21	637	650
AT4G29440.2	| Symbols: | Regulator of Vps4 activity in the MVB pathway protein | chr4:14473942-14477683 REVERSE LENGTH=1062	YFFPsDTEDQGDDSK	S5 Phospho	1	50.64	258.18	1	85.85	28.32	2	1829.68	915.846	2	0.00931	5.08	622	636
AT4G29440.2	| Symbols: | Regulator of Vps4 activity in the MVB pathway protein | chr4:14473942-14477683 REVERSE LENGTH=1062	TVTsPDPETPAK	S4 Phospho	1	49.9	174.52	0.9974	39.6	29.56	2	1321.59	661.802	2	0.00857	6.48	1026	1037
AT4G29440.2	| Symbols: | Regulator of Vps4 activity in the MVB pathway protein | chr4:14473942-14477683 REVERSE LENGTH=1062	VSFDEEsPPK	S7 Phospho	1	72.13	85.51	0.9689	9.11	28.68	2	1213.5	607.755	2	0.00459	3.78	849	858
AT4G29440.2	| Symbols: | Regulator of Vps4 activity in the MVB pathway protein | chr4:14473942-14477683 REVERSE LENGTH=1062	YFFPSDtEDQGDDSK	T7 Phospho	0.5	0	125.13	0.9943	23.2	28.3	2	1829.68	915.846	2	0.00981	5.36	622	636
AT3G53710.1	| Symbols: AGD6 | ARF-GAP domain 6 | chr3:19903730-19905419 REVERSE LENGTH=459	NQsANDFR	S3 Phospho	1	1000	135.59	0.99	25.5	25.72	2	1030.39	516.203	2	0.00385	3.73	167	174
AT3G53710.1	| Symbols: AGD6 | ARF-GAP domain 6 | chr3:19903730-19905419 REVERSE LENGTH=459	SKsSEDIYTR	S3 Phospho	1	63.19	183.13	0.9986	34.92	29.61	2	1264.54	633.277	2	0.00477	3.77	186	195
AT3G45780.2	| Symbols: PHOT1, NPH1, JK224, RPT1 | phototropin 1 | chr3:16818557-16823960 FORWARD LENGTH=996	DERPEsVDDK	S6 Phospho	1	1000	151.08	0.9991	20.68	28.63	2	1268.5	635.256	2	0.00439	3.46	445	454
AT3G45780.2	| Symbols: PHOT1, NPH1, JK224, RPT1 | phototropin 1 | chr3:16818557-16823960 FORWARD LENGTH=996	GTsPQPRPQQEPAPSNPVR	S3 Phospho	1	24.44	314.75	0.9982	40.52	32.11	2	2122	708.341	3	0.00608	2.86	56	74
AT5G61210.1	| Symbols: SNAP33, ATSNAP33, SNP33, ATSNAP33B | soluble N-ethylmaleimide-sensitive factor adaptor protein 33 | chr5:24624027-24625366 FORWARD LENGTH=300	SSKPNPFDsDDESDNK	S9 Phospho	1	43.97	167.85	1	39.81	29.49	2	1860.71	931.364	2	0.00881	4.73	21	36
AT1G16520.1	| Symbols: | unknown protein; FUNCTIONS IN: molecular_function unknown; INVOLVED IN: biological_process unknown; LOCATED IN: plasma membrane; EXPRESSED IN: 22 plant structures; EXPRESSED DURING: 13 growth stages; BEST Arabidopsis thaliana protein m	ATLWYPSSQQSSAANsPPR	S16 Phospho	0.99	21.95	221.12	0.9978	43.9	32.4	2	2126.95	1064.48	2	0.0102	4.82	0	0
AT1G16520.1	| Symbols: | unknown protein; FUNCTIONS IN: molecular_function unknown; INVOLVED IN: biological_process unknown; LOCATED IN: plasma membrane; EXPRESSED IN: 22 plant structures; EXPRESSED DURING: 13 growth stages; BEST Arabidopsis thaliana protein m	IISTSVsPR	S7 Phospho	0.98	21.44	130.9	0.9991	37.9	30.48	2	1038.51	520.263	2	0.00133	1.28	0	0
AT1G16520.1	| Symbols: | unknown protein; FUNCTIONS IN: molecular_function unknown; INVOLVED IN: biological_process unknown; LOCATED IN: plasma membrane; EXPRESSED IN: 22 plant structures; EXPRESSED DURING: 13 growth stages; BEST Arabidopsis thaliana protein m	LtPTATPK	T2 Phospho	1	53.97	75.85	0.972	11.55	28.4	2	907.445	454.73	2	0.00307	3.38	0	0
AT1G16520.1	| Symbols: | unknown protein; FUNCTIONS IN: molecular_function unknown; INVOLVED IN: biological_process unknown; LOCATED IN: plasma membrane; EXPRESSED IN: 22 plant structures; EXPRESSED DURING: 13 growth stages; BEST Arabidopsis thaliana protein m	KITSMAIAsR	S9 Phospho	1	89.92	104.62	0.945	10.26	29.32	2	1156.57	579.292	2	0.00109	0.94	0	0
AT5G21160.2	| Symbols: | LA RNA-binding protein | chr5:7198817-7203879 REVERSE LENGTH=832	LSSSPQcTLSGSsPPVGSLPK	S13 Phospho	0.33	0	140.98	0.9934	24.66	31.98	2	2165.01	1083.51	2	0.00528	2.44	632	652
AT5G21160.2	| Symbols: | LA RNA-binding protein | chr5:7198817-7203879 REVERSE LENGTH=832	STSAETIGDGDKDsPK	S14 Phospho	1	266.83	409.85	1	86.47	30.3	2	1686.71	844.36	2	0.00615	3.64	365	380
AT5G21160.2	| Symbols: | LA RNA-binding protein | chr5:7198817-7203879 REVERSE LENGTH=832	KSTSAETIGDGDKDsPK	S15 Phospho	1	128.78	136.53	0.9991	21.9	31.32	2	1814.8	908.406	2	0.00421	2.32	364	380
AT5G21160.2	| Symbols: | LA RNA-binding protein | chr5:7198817-7203879 REVERSE LENGTH=832	LSSSPQcTLSGSSPPVGsLPK	S18 Phospho	0.12	0	56.78	0.9346	9.84	31.97	2	2165.02	1083.52	2	0.00988	4.56	632	652
AT5G21160.2	| Symbols: | LA RNA-binding protein | chr5:7198817-7203879 REVERSE LENGTH=832	SITsGDNFGNPSK	S4 Phospho	1	26.2	197.88	0.999	56.43	28.89	2	1402.58	702.299	2	0.00623	4.44	381	393
AT5G21160.2	| Symbols: | LA RNA-binding protein | chr5:7198817-7203879 REVERSE LENGTH=832	LVIVTQNsGK	S8 Phospho	0.99	18.44	147.66	0.995	19.36	29.52	2	1137.58	569.799	2	0.00441	3.87	483	492
AT5G21160.2	| Symbols: | LA RNA-binding protein | chr5:7198817-7203879 REVERSE LENGTH=832	LSsSPQcTLSGSSPPVGSLPK	S3 Phospho	0	0	204.66	0.998	37.71	31.96	2	2165.02	1083.52	2	0.00828	3.82	632	652
AT3G50670.1	| Symbols: U1-70K, U1SNRNP | U1 small nuclear ribonucleoprotein-70K | chr3:18826476-18829492 REVERSE LENGTH=427	TSQsEEPSRPR	S4 Phospho	1	39.54	125.01	1	39.42	29.5	2	1352.57	451.865	3	0.00154	1.14	252	262
AT3G50670.1	| Symbols: U1-70K, U1SNRNP | U1 small nuclear ribonucleoprotein-70K | chr3:18826476-18829492 REVERSE LENGTH=427	ELsHEQPR	S3 Phospho	1	1000	90.92	0.99	24.36	27.13	2	1074.45	538.234	2	0.00319	2.96	280	287
AT3G50670.1	| Symbols: U1-70K, U1SNRNP | U1 small nuclear ribonucleoprotein-70K | chr3:18826476-18829492 REVERSE LENGTH=427	TsQSEEPSRPR	S2 Phospho	0.01	0	161.42	0.9981	57.08	29.54	2	1352.57	677.295	2	0.00273	2.02	252	262
AT3G50670.1	| Symbols: U1-70K, U1SNRNP | U1 small nuclear ribonucleoprotein-70K | chr3:18826476-18829492 REVERSE LENGTH=427	SEsREYVR	S3 Phospho	0	0	65.51	0.9502	9.64	29.16	2	1104.46	553.239	2	0.00379	3.43	420	427
AT5G46750.1	| Symbols: AGD9 | ARF-GAP domain 9 | chr5:18969950-18971817 REVERSE LENGTH=402	sISSAQFFGNQNR	S1 Phospho	1	50.64	261.76	0.9996	77.59	30.48	2	1534.66	768.338	2	0.00457	2.97	307	319
AT5G46750.1	| Symbols: AGD9 | ARF-GAP domain 9 | chr5:18969950-18971817 REVERSE LENGTH=402	QEAAVVSsPK	S8 Phospho	0.5	0	160.9	0.9988	45.6	28.67	2	1094.5	548.259	2	0.00311	2.84	162	171
AT5G46750.1	| Symbols: AGD9 | ARF-GAP domain 9 | chr5:18969950-18971817 REVERSE LENGTH=402	ESSLKQEAAVVSsPK	S13 Phospho	0.99	21.95	334.04	0.9841	58.02	30.97	2	1638.78	820.399	2	-0.00373	-2.28	157	171
AT5G46750.1	| Symbols: AGD9 | ARF-GAP domain 9 | chr5:18969950-18971817 REVERSE LENGTH=402	SIsSAQFFGNQNR	S3 Phospho	1	58.42	286.64	0.9976	81.09	30.68	2	1534.67	768.341	2	0.0107	6.97	307	319
AT5G46750.1	| Symbols: AGD9 | ARF-GAP domain 9 | chr5:18969950-18971817 REVERSE LENGTH=402	DNLYEQKPEEPVPVIPAAsPTNDTSAAGSSFASR	S19 Phospho	0.99	21.95	165.05	0.9989	38.25	33.21	2	3624.67	1209.23	3	0.0104	2.86	207	240
AT5G46750.1	| Symbols: AGD9 | ARF-GAP domain 9 | chr5:18969950-18971817 REVERSE LENGTH=402	SISsAQFFGNQNR	S4 Phospho	0.33	0	84.44	0.9872	17.7	30.48	2	1534.66	768.338	2	0.00473	3.08	307	319
AT5G46750.1	| Symbols: AGD9 | ARF-GAP domain 9 | chr5:18969950-18971817 REVERSE LENGTH=402	QEAAVVsSPK	S7 Phospho	0	0	134.13	0.9975	41.93	28.95	2	1094.51	548.261	2	0.00641	5.85	162	171
AT1G80180.1	| Symbols: | unknown protein; FUNCTIONS IN: molecular_function unknown; INVOLVED IN: biological_process unknown; LOCATED IN: plasma membrane; EXPRESSED IN: 21 plant structures; EXPRESSED DURING: 10 growth stages; BEST Arabidopsis thaliana protein m	QGsSGIVWDDR	S3 Phospho	1	30.97	173.05	1	63.84	28.85	2	1298.54	650.276	2	0.00719	5.53	0	0
AT1G80180.1	| Symbols: | unknown protein; FUNCTIONS IN: molecular_function unknown; INVOLVED IN: biological_process unknown; LOCATED IN: plasma membrane; EXPRESSED IN: 21 plant structures; EXPRESSED DURING: 10 growth stages; BEST Arabidopsis thaliana protein m	RQGsSGIVWDDR	S4 Phospho	1	26.2	171.17	0.9794	15.3	30.18	2	1454.63	728.325	2	0.00425	2.92	0	0
AT1G35580.2	| Symbols: CINV1 | cytosolic invertase 1 | chr1:13122460-13124808 REVERSE LENGTH=551	SVLDTPLSsAR	S9 Phospho	0.33	0	90.1	0.9182	9.93	29.98	2	1224.58	613.298	2	0.00563	4.59	66	76
AT1G35580.2	| Symbols: CINV1 | cytosolic invertase 1 | chr1:13122460-13124808 REVERSE LENGTH=551	SVLDtPLSSAR	T5 Phospho	1	61.87	134.93	1	31.88	30	2	1224.58	613.298	2	0.00619	5.05	66	76
AT1G79280.3	| Symbols: NUA | nuclear pore anchor | chr1:29819176-29832809 REVERSE LENGTH=2094	RAPsPGGGSSTIVTLADR	S4 Phospho	1	53.4	291.18	0.9982	67.16	31.51	2	1820.88	607.968	3	0.00419	2.3	2020	2037
AT1G79280.3	| Symbols: NUA | nuclear pore anchor | chr1:29819176-29832809 REVERSE LENGTH=2094	SSDLsPAVVPGR	S5 Phospho	1	63.6	163.15	1	51.25	29.28	2	1263.59	632.803	2	0.00607	4.8	659	670
AT1G79280.3	| Symbols: NUA | nuclear pore anchor | chr1:29819176-29832809 REVERSE LENGTH=2094	APsPGGGSSTIVTLADR	S3 Phospho	1	196	342.49	0.9994	109.8	31.09	2	1664.78	833.399	2	0.00653	3.92	2021	2037
AT1G79280.3	| Symbols: NUA | nuclear pore anchor | chr1:29819176-29832809 REVERSE LENGTH=2094	EEVQPETLATPTQsPSR	S14 Phospho	0.2	0	137.62	0.9942	25.45	32.61	2	1948.89	975.45	2	0.00759	3.89	1916	1932
AT1G79280.3	| Symbols: NUA | nuclear pore anchor | chr1:29819176-29832809 REVERSE LENGTH=2094	SPEKEEVQPETLATPTQsPSR	S18 Phospho	0.02	0	211.87	0.9904	26.25	33.12	2	2390.11	797.712	3	0.0127	5.33	1912	1932
AT1G79280.3	| Symbols: NUA | nuclear pore anchor | chr1:29819176-29832809 REVERSE LENGTH=2094	APSPGGGSStIVTLADR	T10 Phospho	0.25	0	70.12	0.9731	15.73	31.1	2	1664.78	555.935	3	0.00659	3.96	2021	2037
AT1G79280.3	| Symbols: NUA | nuclear pore anchor | chr1:29819176-29832809 REVERSE LENGTH=2094	RAPSPGGGSsTIVTLADR	S10 Phospho	0	0	232.64	0.9982	45.82	31.46	2	1820.88	607.968	3	0.00455	2.5	2020	2037
AT1G79280.3	| Symbols: NUA | nuclear pore anchor | chr1:29819176-29832809 REVERSE LENGTH=2094	SPEKEEVQPETLATPtQSPSR	T16 Phospho	1	53.49	264.37	0.9929	29.88	33.17	2	2390.11	797.711	3	0.0114	4.78	1912	1932
AT3G29075.1	| Symbols: | glycine-rich protein | chr3:11051645-11052629 REVERSE LENGTH=294	KDGNNsEDDEFK	S6 Phospho	1	1000	211.73	1	49.35	26.89	2	1476.54	739.279	2	0.00181	1.22	0	0
AT3G29075.1	| Symbols: | glycine-rich protein | chr3:11051645-11052629 REVERSE LENGTH=294	DGNNsEDDEFK	S5 Phospho	1	1000	232.03	1	65.55	25	2	1348.45	675.233	2	0.00475	3.52	0	0
AT3G29075.1	| Symbols: | glycine-rich protein | chr3:11051645-11052629 REVERSE LENGTH=294	DGNNsEDDEFKK	S5 Phospho	1	1000	278.57	1	69.49	26.99	2	1476.54	739.28	2	0.00393	2.66	0	0
AT3G29075.1	| Symbols: | glycine-rich protein | chr3:11051645-11052629 REVERSE LENGTH=294	KDGNNsEDDEFKK	S6 Phospho	1	1000	123.58	0.9991	23.18	30.02	2	1604.64	803.327	2	0.00313	1.95	0	0
AT3G07810.2	| Symbols: | RNA-binding (RRM/RBD/RNP motifs) family protein | chr3:2492875-2495102 FORWARD LENGTH=495	ELsPGPSR	S3 Phospho	1	77.52	91.75	0.99	21.01	26.73	2	921.399	461.707	2	0.00311	3.37	187	194
AT3G07810.2	| Symbols: | RNA-binding (RRM/RBD/RNP motifs) family protein | chr3:2492875-2495102 FORWARD LENGTH=495	sPLGAGYSYGVNR	S1 Phospho	1	117.08	151.72	1	34.79	30.88	2	1419.62	710.818	2	0.00263	1.85	195	207
AT3G07810.2	| Symbols: | RNA-binding (RRM/RBD/RNP motifs) family protein | chr3:2492875-2495102 FORWARD LENGTH=495	SNSSsIQGSPGGPGR	S5 Phospho	0.3	24.95	137.45	0.9947	19.82	30.44	2	1466.62	734.318	2	0.00695	4.73	92	106
AT3G07810.2	| Symbols: | RNA-binding (RRM/RBD/RNP motifs) family protein | chr3:2492875-2495102 FORWARD LENGTH=495	SNSSSIQGsPGGPGR	S9 Phospho	1	165.62	321.84	0.9995	107.1	30.43	2	1466.62	734.317	2	0.00375	2.55	92	106
AT3G07810.2	| Symbols: | RNA-binding (RRM/RBD/RNP motifs) family protein | chr3:2492875-2495102 FORWARD LENGTH=495	SSsPGYVGSYSVNK	S3 Phospho	1	27.96	253.22	0.9988	62.72	30.11	2	1510.64	756.327	2	0.00529	3.5	472	485
AT3G07810.2	| Symbols: | RNA-binding (RRM/RBD/RNP motifs) family protein | chr3:2492875-2495102 FORWARD LENGTH=495	SNsSSIQGSPGGPGR	S3 Phospho	1	52.4	235.26	0.9993	69.63	30.43	2	1466.62	734.318	2	0.00635	4.33	92	106
AT1G80930.1	| Symbols: | MIF4G domain-containing protein / MA3 domain-containing protein | chr1:30405774-30409499 REVERSE LENGTH=900	AsDDDEEGEIR	S2 Phospho	1	1000	155.88	0.9993	25.71	26.47	2	1314.47	658.242	2	0.00757	5.75	212	222
AT1G80930.1	| Symbols: | MIF4G domain-containing protein / MA3 domain-containing protein | chr1:30405774-30409499 REVERSE LENGTH=900	ETsDDEELAR	S3 Phospho	1	55.92	190.91	0.9993	74.97	27.75	2	1243.47	622.74	2	0.00489	3.93	78	87
AT1G80930.1	| Symbols: | MIF4G domain-containing protein / MA3 domain-containing protein | chr1:30405774-30409499 REVERSE LENGTH=900	VIADKPsDEEDDR	S7 Phospho	1	1000	209.74	0.9996	31.01	30.02	2	1567.65	784.83	2	0.00447	2.85	181	193
AT1G80930.1	| Symbols: | MIF4G domain-containing protein / MA3 domain-containing protein | chr1:30405774-30409499 REVERSE LENGTH=900	IEVDsDGDGER	S5 Phospho	1	1000	223.86	1	53.84	27.08	2	1270.48	636.246	2	0.00527	4.14	108	118
AT1G80930.1	| Symbols: | MIF4G domain-containing protein / MA3 domain-containing protein | chr1:30405774-30409499 REVERSE LENGTH=900	KETsDDEELAR	S4 Phospho	0.5	0	102.65	0.9939	27.39	29.05	2	1371.56	686.786	2	0.00131	0.953	77	87
AT1G80930.1	| Symbols: | MIF4G domain-containing protein / MA3 domain-containing protein | chr1:30405774-30409499 REVERSE LENGTH=900	RIEVDsDGDGER	S6 Phospho	1	1000	143.36	0.9986	17	29.34	2	1426.58	714.296	2	0.00365	2.56	107	118
AT1G80930.1	| Symbols: | MIF4G domain-containing protein / MA3 domain-containing protein | chr1:30405774-30409499 REVERSE LENGTH=900	VIADKPsDEEDDRQR	S7 Phospho	1	1000	110.3	0.9948	12.58	31.45	2	1851.8	618.276	3	0.00443	2.39	181	195
AT2G43160.4	| Symbols: | ENTH/VHS family protein | chr2:17948884-17952920 FORWARD LENGTH=646	sVDNYGSR	S1 Phospho	1	75.44	76.82	0.99	17.29	26.88	2	976.37	489.192	2	0.00525	5.37	236	243
AT2G43160.4	| Symbols: | ENTH/VHS family protein | chr2:17948884-17952920 FORWARD LENGTH=646	SRsVDNYGSR	S3 Phospho	1	49.21	230.84	0.9991	49.67	29.32	2	1219.5	610.758	2	0.00311	2.55	234	243
AT2G43160.4	| Symbols: | ENTH/VHS family protein | chr2:17948884-17952920 FORWARD LENGTH=646	SVDNYGsR	S7 Phospho	0.99	19.53	107.34	0.99	27.35	26.56	2	976.369	489.192	2	0.00395	4.04	236	243
AT2G43160.4	| Symbols: | ENTH/VHS family protein | chr2:17948884-17952920 FORWARD LENGTH=646	KFsEQNIGAPPSYEEAVSDSR	S3 Phospho	1	135.37	303.92	1	50.76	33.03	2	2390.05	797.691	3	0.00777	3.25	280	300
AT2G43160.4	| Symbols: | ENTH/VHS family protein | chr2:17948884-17952920 FORWARD LENGTH=646	DGGETPQVTAPGAASPPPPQVAAPEAAsPPTGTNTANTTATFVNESPSQK	S28 Phospho	0.28	0	136.75	0.9977	31.95	32.38	2	4893.28	1224.33	4	0.0198	4.04	308	357
AT3G49590.1	| Symbols: | Autophagy-related protein 13 | chr3:18377892-18380104 FORWARD LENGTH=603	StSDALEELR	T2 Phospho	0.33	0	147.98	0.9977	34.44	29.08	2	1199.51	600.764	2	0.00687	5.72	571	580
AT3G49590.1	| Symbols: | Autophagy-related protein 13 | chr3:18377892-18380104 FORWARD LENGTH=603	TSSSISQsLPLGR	S8 Phospho	1	24.95	175.03	0.9991	39.58	30.86	2	1411.68	706.846	2	0.00657	4.65	506	518
AT3G49590.1	| Symbols: | Autophagy-related protein 13 | chr3:18377892-18380104 FORWARD LENGTH=603	TSsSISQSLPLGR	S3 Phospho	0.49	0	128	0.9929	20.07	30.72	2	1411.68	706.847	2	0.00775	5.48	506	518
AT3G49590.1	| Symbols: | Autophagy-related protein 13 | chr3:18377892-18380104 FORWARD LENGTH=603	FSGVLSSSDsPR	S10 Phospho	0.99	24.95	295.54	0.9996	83.34	30.03	2	1317.57	659.79	2	0.00623	4.72	449	460
AT3G49590.1	| Symbols: | Autophagy-related protein 13 | chr3:18377892-18380104 FORWARD LENGTH=603	SVEGHsFTGR	S6 Phospho	0.98	20.98	35.25	0.9881	17.05	28.17	2	1155.48	578.747	2	0.00751	6.49	263	272
AT3G49590.1	| Symbols: | Autophagy-related protein 13 | chr3:18377892-18380104 FORWARD LENGTH=603	FSGVLSSsDSPR	S8 Phospho	0.57	26.2	163.83	0.994	21.62	30	2	1317.57	659.791	2	0.00729	5.53	449	460
AT3G49590.1	| Symbols: | Autophagy-related protein 13 | chr3:18377892-18380104 FORWARD LENGTH=603	YVSSNFsEPGR	S7 Phospho	0.97	17.78	83.94	0.9985	21.99	29.13	2	1321.54	661.778	2	0.00727	5.5	380	390
AT3G49590.1	| Symbols: | Autophagy-related protein 13 | chr3:18377892-18380104 FORWARD LENGTH=603	SPsSQDSLPGIALYR	S3 Phospho	0.01	0	157.87	0.9959	24.99	31.31	2	1669.78	835.895	2	0.00497	2.97	404	418
AT3G49590.1	| Symbols: | Autophagy-related protein 13 | chr3:18377892-18380104 FORWARD LENGTH=603	STsDALEELR	S3 Phospho	1	48.15	165.24	0.9987	39.02	29.12	2	1199.51	600.762	2	0.00315	2.62	571	580
AT2G39730.1	| Symbols: RCA | rubisco activase | chr2:16570951-16573345 REVERSE LENGTH=474	GLAYDtSDDQQDITR	T6 Phospho	1	30.97	354.07	0.9964	117	30.47	2	1776.73	889.371	2	0.00643	3.62	73	87
AT2G39730.1	| Symbols: RCA | rubisco activase | chr2:16570951-16573345 REVERSE LENGTH=474	sDDGTcVYNF	S1 Phospho	0.33	0	26.16	0.9985	20.25	25	2	1256.41	629.213	2	0.00644	5.12	465	474
AT2G39730.1	| Symbols: RCA | rubisco activase | chr2:16570951-16573345 REVERSE LENGTH=474	GLAYDTsDDQQDITR	S7 Phospho	0.49	0	114.75	0.9409	11.75	30.46	2	1776.73	593.25	3	0.00744	4.19	73	87
AT1G47200.1	| Symbols: WPP2 | WPP domain protein 2 | chr1:17298181-17298723 REVERSE LENGTH=180	DDAGPAsEEEK	S7 Phospho	1	1000	93.91	0.9985	15.65	25.79	2	1226.44	614.228	2	0.00645	5.25	167	177
AT1G47200.1	| Symbols: WPP2 | WPP domain protein 2 | chr1:17298181-17298723 REVERSE LENGTH=180	DDAGPAsEEEKSEA	S7 Phospho	1	115.81	267.59	1	61.11	27.05	2	1513.55	757.783	2	0.00465	3.07	167	180
AT1G47200.1	| Symbols: WPP2 | WPP domain protein 2 | chr1:17298181-17298723 REVERSE LENGTH=180	DDAGPASEEEKsEA	S12 Phospho	0.5	0	59.16	0.9996	25.47	27.13	2	1513.55	757.783	2	0.00527	3.48	167	180
AT1G16860.1	| Symbols: | Ubiquitin-specific protease family C19-related protein | chr1:5768280-5770183 FORWARD LENGTH=474	SsGPQSGGVTR	S2 Phospho	0.5	0	138.15	0.9987	54.75	28.69	2	1111.47	556.742	2	0.00307	2.76	124	134
AT1G16860.1	| Symbols: | Ubiquitin-specific protease family C19-related protein | chr1:5768280-5770183 FORWARD LENGTH=474	sGPIPGAPSR	S1 Phospho	1	98.63	96.48	0.9994	19.68	28.98	2	1017.47	509.741	2	0.00311	3.05	64	73
AT4G27450.1	| Symbols: | Aluminium induced protein with YGL and LRDR motifs | chr4:13727665-13728683 REVERSE LENGTH=250	VDsEGVLcGANFK	S3 Phospho	1	1000	220.75	0.9992	102.1	29.97	2	1474.62	738.318	2	0.0058	3.93	217	229
AT4G27450.1	| Symbols: | Aluminium induced protein with YGL and LRDR motifs | chr4:13727665-13728683 REVERSE LENGTH=250	RGsEANWSL	S3 Phospho	1	84.78	80.85	0.9793	10.43	27.46	2	1098.45	550.233	2	0.00243	2.21	242	250
AT1G59710.1	| Symbols: | Protein of unknown function (DUF569) | chr1:21938623-21939673 FORWARD LENGTH=300	QESTDSLAVGsPPK	S11 Phospho	1	61.63	137.05	0.999	20.3	30.92	2	1494.67	748.34	2	0.00495	3.31	194	207
AT1G59710.1	| Symbols: | Protein of unknown function (DUF569) | chr1:21938623-21939673 FORWARD LENGTH=300	QEStDSLAVGSPPK	T4 Phospho	0.99	23.98	190.04	0.9986	37.3	30.81	2	1494.67	748.341	2	0.00759	5.07	194	207
AT1G59710.1	| Symbols: | Protein of unknown function (DUF569) | chr1:21938623-21939673 FORWARD LENGTH=300	QESTDSLAVGsPPKSEGR	S11 Phospho	1	63.52	244.41	1	55.82	31.82	2	1923.86	962.938	2	0.00431	2.24	194	211
AT3G60240.2	| Symbols: EIF4G, CUM2 | eukaryotic translation initiation factor 4G | chr3:22261842-22268295 FORWARD LENGTH=1723	STEGSSHASSEISGSsPQEK	S16 Phospho	1	27.96	295.34	0.9979	50.64	30.79	2	2070.84	1036.43	2	0.00355	1.71	693	712
AT3G60240.2	| Symbols: EIF4G, CUM2 | eukaryotic translation initiation factor 4G | chr3:22261842-22268295 FORWARD LENGTH=1723	ASDLsPEVSSAR	S5 Phospho	0.44	25.23	96.6	0.9978	21.16	29.66	2	1297.56	649.787	2	0.00431	3.32	1502	1513
AT3G60240.2	| Symbols: EIF4G, CUM2 | eukaryotic translation initiation factor 4G | chr3:22261842-22268295 FORWARD LENGTH=1723	QVLQGPSATVNsPR	S12 Phospho	1	63.6	266.71	0.9991	47.82	30.64	2	1532.74	767.378	2	0.00615	4.01	1514	1527
AT3G60240.2	| Symbols: EIF4G, CUM2 | eukaryotic translation initiation factor 4G | chr3:22261842-22268295 FORWARD LENGTH=1723	TAsDKLDER	S3 Phospho	1	23.2	104.28	0.996	19.58	28.62	2	1113.47	557.744	2	0.00319	2.86	720	728
AT3G60240.2	| Symbols: EIF4G, CUM2 | eukaryotic translation initiation factor 4G | chr3:22261842-22268295 FORWARD LENGTH=1723	RPsNVAGDDR	S3 Phospho	1	1000	72.34	0.9918	11.55	28.22	2	1165.49	583.753	2	0.00341	2.92	979	988
AT5G56030.1	| Symbols: HSP81-2, ERD8, HSP90.2, AtHsp90.2 | heat shock protein 81-2 | chr5:22686923-22689433 FORWARD LENGTH=699	EIsDDEEEEEK	S3 Phospho	1	1000	169.49	1	39.15	26.63	2	1430.5	716.258	2	0.00383	2.67	217	227
AT5G56030.1	| Symbols: HSP81-2, ERD8, HSP90.2, AtHsp90.2 | heat shock protein 81-2 | chr5:22686923-22689433 FORWARD LENGTH=699	EIsDDEEEEEKK	S3 Phospho	1	1000	218.83	1	63.71	28.77	2	1558.6	780.305	2	0.00253	1.62	217	228
AT5G56030.1	| Symbols: HSP81-2, ERD8, HSP90.2, AtHsp90.2 | heat shock protein 81-2 | chr5:22686923-22689433 FORWARD LENGTH=699	TIEKEIsDDEEEEEK	S7 Phospho	1	132.33	220.45	1	54.15	30.8	2	1901.77	951.893	2	0.00361	1.9	213	227
AT5G56030.1	| Symbols: HSP81-2, ERD8, HSP90.2, AtHsp90.2 | heat shock protein 81-2 | chr5:22686923-22689433 FORWARD LENGTH=699	EIsDDEEEEEKKDEEGK	S3 Phospho	1	1000	141.13	0.9984	18.66	30.51	2	2116.82	706.615	3	0.00319	1.51	217	233
AT3G26400.1	| Symbols: EIF4B1 | eukaryotic translation initiation factor 4B1 | chr3:9666616-9669081 FORWARD LENGTH=532	AGsIDETR	S3 Phospho	1	83.7	81.83	0.99	18.15	26.68	2	927.373	464.694	2	0.00275	2.96	478	485
AT3G26400.1	| Symbols: EIF4B1 | eukaryotic translation initiation factor 4B1 | chr3:9666616-9669081 FORWARD LENGTH=532	SStFGSSFGDSGQEER	T3 Phospho	1	26.2	283.51	0.9988	68.58	28.67	2	1756.67	879.34	2	0.00741	4.21	237	252
AT3G26400.1	| Symbols: EIF4B1 | eukaryotic translation initiation factor 4B1 | chr3:9666616-9669081 FORWARD LENGTH=532	QKPVERPGsGAGR	S9 Phospho	1	1000	77.4	0.9742	10.56	30.76	2	1417.69	473.569	3	0.00284	2	454	466
AT5G04990.1	| Symbols: SUN1, ATSUN1 | SAD1/UNC-84 domain protein 1 | chr5:1471698-1473770 REVERSE LENGTH=471	SVsAATGTNTTATQR	S3 Phospho	0.99	20.77	205.9	0.9984	35.93	30.56	2	1544.69	773.351	2	0.00501	3.24	75	89
AT5G04990.1	| Symbols: SUN1, ATSUN1 | SAD1/UNC-84 domain protein 1 | chr5:1471698-1473770 REVERSE LENGTH=471	RSVsAATGTNTTATQR	S4 Phospho	0.25	0	117.66	0.9981	36.1	31.5	2	1700.79	567.937	3	0.00541	3.18	74	89
AT5G04990.1	| Symbols: SUN1, ATSUN1 | SAD1/UNC-84 domain protein 1 | chr5:1471698-1473770 REVERSE LENGTH=471	DLsRGEATLDR	S3 Phospho	1	39.42	46.02	0.9986	23.54	30.15	2	1311.59	656.8	2	0.00347	2.64	52	62
AT5G04990.1	| Symbols: SUN1, ATSUN1 | SAD1/UNC-84 domain protein 1 | chr5:1471698-1473770 REVERSE LENGTH=471	sVSAATGTNTTATQR	S1 Phospho	1	54.16	220.72	0.9994	75.22	30.69	2	1544.69	773.351	2	0.00407	2.63	75	89
AT5G04990.1	| Symbols: SUN1, ATSUN1 | SAD1/UNC-84 domain protein 1 | chr5:1471698-1473770 REVERSE LENGTH=471	sQGQDLGPVTR	S1 Phospho	1	204.82	195.1	1	71.95	29.24	2	1236.55	619.282	2	-0.00117	-0.947	63	73
AT5G04990.1	| Symbols: SUN1, ATSUN1 | SAD1/UNC-84 domain protein 1 | chr5:1471698-1473770 REVERSE LENGTH=471	GEATLDRsQGQDLGPVTR	S8 Phospho	1	69.63	164.14	0.9528	13.98	31.82	2	1978.92	660.646	3	0.00616	3.11	56	73
AT2G37550.2	| Symbols: ASP1, AGD7 | ARF-GAP domain 7 | chr2:15755544-15757456 REVERSE LENGTH=456	SKsSEDIYSR	S3 Phospho	1	63.19	253.4	0.9987	50.52	28.84	2	1250.52	626.269	2	0.00495	3.95	189	198
AT2G37550.2	| Symbols: ASP1, AGD7 | ARF-GAP domain 7 | chr2:15755544-15757456 REVERSE LENGTH=456	TANSsFGGSQSSSSGHNNSYR	S5 Phospho	1	42.13	225.83	0.9989	51.16	30.9	2	2210.87	737.964	3	0.00912	4.12	363	383
AT2G37550.2	| Symbols: ASP1, AGD7 | ARF-GAP domain 7 | chr2:15755544-15757456 REVERSE LENGTH=456	NQsAGDFR	S3 Phospho	1	1000	140.84	0.99	30.73	25.05	2	973.369	487.692	2	0.00373	3.83	171	178
AT2G37550.2	| Symbols: ASP1, AGD7 | ARF-GAP domain 7 | chr2:15755544-15757456 REVERSE LENGTH=456	TANsSFGGSQSSSSGHNNSYR	S4 Phospho	0.33	0	251.57	0.9977	84.14	30.85	2	2210.87	1106.44	2	0.00505	2.28	363	383
AT4G11740.1	| Symbols: SAY1 | Ubiquitin-like superfamily protein | chr4:7071955-7075256 FORWARD LENGTH=564	AQPRPPsPSLTAQR	S7 Phospho	1	54.16	155.8	0.9957	23.33	30.78	2	1584.78	793.398	2	0.00475	2.99	388	401
AT4G11740.1	| Symbols: SAY1 | Ubiquitin-like superfamily protein | chr4:7071955-7075256 FORWARD LENGTH=564	LAAPSSPFDDDsDDVDEQPLVR	S12 Phospho	0.98	19.53	156.88	0.9983	54.01	32.62	2	2467.05	1234.53	2	0.0106	4.31	284	305
AT4G11740.1	| Symbols: SAY1 | Ubiquitin-like superfamily protein | chr4:7071955-7075256 FORWARD LENGTH=564	SGsPEEEHASINPAER	S3 Phospho	0.5	0	254.98	0.9987	59.64	30.96	2	1788.74	895.377	2	0.00791	4.42	326	341
AT4G11740.1	| Symbols: SAY1 | Ubiquitin-like superfamily protein | chr4:7071955-7075256 FORWARD LENGTH=564	AASGSLAPPNADRsR	S14 Phospho	1	172.93	156.11	0.9986	14.06	31.06	2	1548.71	775.363	2	0.00711	4.59	311	325
AT4G11740.1	| Symbols: SAY1 | Ubiquitin-like superfamily protein | chr4:7071955-7075256 FORWARD LENGTH=564	LAAPSsPFDDDSDDVDEQPLVR	S6 Phospho	0.5	0	200.26	0.9973	60.62	32.7	2	2467.06	1234.54	2	0.0136	5.53	284	305
AT4G11740.1	| Symbols: SAY1 | Ubiquitin-like superfamily protein | chr4:7071955-7075256 FORWARD LENGTH=564	AAsGSLAPPNADR	S3 Phospho	1	54.16	151.19	0.9997	39.09	29.76	2	1305.58	653.795	2	0.00457	3.5	311	323
AT1G18210.2	| Symbols: | Calcium-binding EF-hand family protein | chr1:6268273-6268785 REVERSE LENGTH=170	SSsSAAEIR	S3 Phospho	1	30.97	151.91	0.9996	47.48	28.04	2	986.411	494.213	2	0.00455	4.61	86	94
AT4G10730.1	| Symbols: | Protein kinase superfamily protein | chr4:6609793-6614786 REVERSE LENGTH=711	ASANSLsAPIK	S7 Phospho	1	48.15	216.62	1	53.7	30.06	2	1137.55	569.781	2	0.00433	3.8	525	535
AT4G10730.1	| Symbols: | Protein kinase superfamily protein | chr4:6609793-6614786 REVERSE LENGTH=711	APSFsGPLNLPNR	S5 Phospho	0.5	0	88.14	0.9496	12.68	30.28	2	1448.69	725.351	2	0.00589	4.06	512	524
AT4G10730.1	| Symbols: | Protein kinase superfamily protein | chr4:6609793-6614786 REVERSE LENGTH=711	LQTHSGPLSsGVVLINSDSEK	S10 Phospho	0.25	0	148.64	0.9961	29.39	31.85	2	2247.09	750.037	3	0.00985	4.38	472	492
AT4G10730.1	| Symbols: | Protein kinase superfamily protein | chr4:6609793-6614786 REVERSE LENGTH=711	APsFSGPLNLPNR	S3 Phospho	1	81.61	187.92	1	54.55	30.26	2	1448.69	725.351	2	0.00547	3.77	512	524
AT4G10730.1	| Symbols: | Protein kinase superfamily protein | chr4:6609793-6614786 REVERSE LENGTH=711	SAsVGNWILDSK	S3 Phospho	0.99	19.53	110.3	0.9874	18.98	29.97	2	1355.61	678.815	2	0.00217	1.6	577	588
AT4G10730.1	| Symbols: | Protein kinase superfamily protein | chr4:6609793-6614786 REVERSE LENGTH=711	sASVGNWILDSK	S1 Phospho	0.01	0	111.53	0.9884	28.14	30	2	1355.61	678.814	2	0.000948	0.699	577	588
AT1G68790.1	| Symbols: LINC3 | little nuclei3 | chr1:25834932-25839157 REVERSE LENGTH=1085	ITESEQAAGDsDEGVDSITTGGR	S11 Phospho	1	37.11	182.07	0.9984	41.82	31.97	2	2373.99	792.337	3	0.00838	3.53	900	922
AT1G68790.1	| Symbols: LINC3 | little nuclei3 | chr1:25834932-25839157 REVERSE LENGTH=1085	sQEELDNINYTK	S1 Phospho	1	125.14	151.77	1	40.03	30.42	2	1532.65	767.332	2	0.00943	6.15	636	647
AT1G68790.1	| Symbols: LINC3 | little nuclei3 | chr1:25834932-25839157 REVERSE LENGTH=1085	DSKPsDGETPR	S5 Phospho	1	26.2	69.66	0.9945	17.69	28.63	2	1267.51	634.764	2	0.00461	3.63	880	890
AT1G68790.1	| Symbols: LINC3 | little nuclei3 | chr1:25834932-25839157 REVERSE LENGTH=1085	AEEALNIsPSAENSK	S8 Phospho	1	27.96	157.82	0.9901	27.15	31.32	2	1638.72	820.37	2	0.0112	6.81	757	771
AT2G47400.1	| Symbols: CP12-1, CP12 | CP12 domain-containing protein 1 | chr2:19446889-19447263 FORWARD LENGTH=124	AtSEGEISEK	T2 Phospho	1	55.92	158.05	0.9987	51.37	27.92	2	1129.46	565.737	2	0.00509	4.5	47	56
AT2G47400.1	| Symbols: CP12-1, CP12 | CP12 domain-containing protein 1 | chr2:19446889-19447263 FORWARD LENGTH=124	ATsEGEISEK	S3 Phospho	1	61.94	150.16	0.9989	39.54	28.02	2	1129.46	565.737	2	0.00451	3.99	47	56
AT5G54430.1	| Symbols: ATPHOS32, PHOS32 | Adenine nucleotide alpha hydrolases-like superfamily protein | chr5:22097563-22099693 REVERSE LENGTH=242	IHHPPsPR	S6 Phospho	1	1000	116.52	0.99	13.89	28.94	2	1019.47	510.743	2	0.000788	0.772	16	23
AT5G38640.1	| Symbols: | NagB/RpiA/CoA transferase-like superfamily protein | chr5:15468020-15470674 REVERSE LENGTH=642	DFPDGSTTAsPGR	S10 Phospho	1	43.29	178.71	0.999	51.87	28.69	2	1386.55	694.283	2	0.00597	4.3	99	111
AT5G38640.1	| Symbols: | NagB/RpiA/CoA transferase-like superfamily protein | chr5:15468020-15470674 REVERSE LENGTH=642	VAVAGAAASAVsPSSFSYSSR	S12 Phospho	1	24.95	461.69	0.9996	99.85	32.11	2	2050.95	1026.48	2	0.0102	4.99	77	97
AT5G38640.1	| Symbols: | NagB/RpiA/CoA transferase-like superfamily protein | chr5:15468020-15470674 REVERSE LENGTH=642	LNsSDTFPLR	S3 Phospho	1	27.96	159.34	0.9997	47.16	29.75	2	1228.55	615.284	2	0.00543	4.41	67	76
AT5G38640.1	| Symbols: | NagB/RpiA/CoA transferase-like superfamily protein | chr5:15468020-15470674 REVERSE LENGTH=642	RDFPDGSTTAsPGR	S11 Phospho	1	43.29	122.48	0.9308	11.37	30.27	2	1542.65	772.332	2	0.00293	1.9	98	111
AT5G03280.1	| Symbols: EIN2, PIR2, CKR1, ERA3, ORE3, ORE2, ATEIN2 | NRAMP metal ion transporter family protein | chr5:788589-793066 FORWARD LENGTH=1294	SLSGEGGsGTGSLSR	S8 Phospho	1	42.13	185.66	0.9985	49.06	29.37	2	1430.61	716.313	2	0.00741	5.17	648	662
AT5G03280.1	| Symbols: EIN2, PIR2, CKR1, ERA3, ORE3, ORE2, ATEIN2 | NRAMP metal ion transporter family protein | chr5:788589-793066 FORWARD LENGTH=1294	AAPTSNFTVGSDGPPsFR	S16 Phospho	0.94	17.99	49.77	0.9256	9.6	31.96	2	1886.83	944.422	2	0.00915	4.85	630	647
AT5G03280.1	| Symbols: EIN2, PIR2, CKR1, ERA3, ORE3, ORE2, ATEIN2 | NRAMP metal ion transporter family protein | chr5:788589-793066 FORWARD LENGTH=1294	SLSGEGGSGTGsLSR	S12 Phospho	0.98	19.53	205.93	0.9829	57.38	30.07	2	1430.63	716.323	2	0.0268	18.7	648	662
AT5G03280.1	| Symbols: EIN2, PIR2, CKR1, ERA3, ORE3, ORE2, ATEIN2 | NRAMP metal ion transporter family protein | chr5:788589-793066 FORWARD LENGTH=1294	SLsGEGGSGTGSLSR	S3 Phospho	1	51.15	182.01	0.9978	34.63	33.99	2	1430.61	716.314	2	0.00877	6.12	648	662
AT5G64330.1	| Symbols: NPH3, RPT3, JK218 | Phototropic-responsive NPH3 family protein | chr5:25727568-25730225 FORWARD LENGTH=746	APSPSTTNFAGSsPR	S13 Phospho	0.5	0	215.93	0.9958	42.29	30.6	2	1555.67	778.841	2	0.00151	0.969	211	225
AT5G64330.1	| Symbols: NPH3, RPT3, JK218 | Phototropic-responsive NPH3 family protein | chr5:25727568-25730225 FORWARD LENGTH=746	APsPSTTNFAGSSPR	S3 Phospho	1	77.86	249.03	1	57.3	30.51	2	1555.67	778.842	2	0.00297	1.91	211	225
AT5G64330.1	| Symbols: NPH3, RPT3, JK218 | Phototropic-responsive NPH3 family protein | chr5:25727568-25730225 FORWARD LENGTH=746	DSSFYcsPSR	S7 Phospho	1	27.96	148.48	0.9962	30.61	25.9	2	1284.45	643.233	2	0.00412	3.21	231	240
AT5G47690.3	| Symbols: | binding | chr5:19317899-19327014 FORWARD LENGTH=1607	EAEENAETsDNETLGAWK	S9 Phospho	1	55.92	407.97	0.9993	97.62	30.75	2	2072.83	1037.42	2	0.00735	3.54	1578	1595
AT5G47690.3	| Symbols: | binding | chr5:19317899-19327014 FORWARD LENGTH=1607	SSALPIETEYsGEAGEEK	S11 Phospho	0.33	0	97.92	0.9267	10.95	31.77	2	1975.84	988.926	2	0.00695	3.51	1502	1519
AT5G47690.3	| Symbols: | binding | chr5:19317899-19327014 FORWARD LENGTH=1607	NVSLDSHDENsDQEK	S11 Phospho	1	84.78	217.41	1	77.23	29.52	2	1795.7	898.855	2	0.00645	3.59	1279	1293
AT5G47690.3	| Symbols: | binding | chr5:19317899-19327014 FORWARD LENGTH=1607	DEDPVTTtPK	T8 Phospho	0.33	0	147.73	0.9956	22.42	28.21	2	1181.49	591.753	2	0.00569	4.81	1456	1465
AT5G47690.3	| Symbols: | binding | chr5:19317899-19327014 FORWARD LENGTH=1607	EAEENAEtSDNETLGAWK	T8 Phospho	0.33	0	200.26	0.9946	32.42	30.55	2	2072.82	1037.42	2	0.00175	0.843	1578	1595
AT5G47690.3	| Symbols: | binding | chr5:19317899-19327014 FORWARD LENGTH=1607	NVSLDsHDENSDQEK	S6 Phospho	1	23.2	70.38	0.9276	6.46	29.61	2	1795.7	898.856	2	0.00761	4.23	1279	1293
AT4G35890.1	| Symbols: | winged-helix DNA-binding transcription factor family protein | chr4:16997433-17000410 FORWARD LENGTH=523	GESEPIAAAAAVAGPSsPQSR	S17 Phospho	0.5	0	296.02	0.9984	63.85	32.09	2	2031.93	1016.97	2	0.00615	3.02	51	71
AT4G35890.1	| Symbols: | winged-helix DNA-binding transcription factor family protein | chr4:16997433-17000410 FORWARD LENGTH=523	ISGNHGsPTASVAQSPR	S7 Phospho	0.49	0	79.26	0.9507	16.21	31.77	2	1744.8	873.407	2	0.0105	6	19	35
AT4G35890.1	| Symbols: | winged-helix DNA-binding transcription factor family protein | chr4:16997433-17000410 FORWARD LENGTH=523	ISGNHGSPTASVAQsPR	S15 Phospho	1	89.92	233.79	0.9995	44.98	31.76	2	1744.79	873.404	2	0.00483	2.77	19	35
AT4G35890.1	| Symbols: | winged-helix DNA-binding transcription factor family protein | chr4:16997433-17000410 FORWARD LENGTH=523	QVsSPWTQIVR	S3 Phospho	1	30.97	137.88	0.9988	31.54	30.34	2	1379.66	690.839	2	0.00379	2.74	40	50
AT4G35890.1	| Symbols: | winged-helix DNA-binding transcription factor family protein | chr4:16997433-17000410 FORWARD LENGTH=523	ISGNHGSPtASVAQSPR	T9 Phospho	0.33	0	113.59	0.9958	29.66	31.77	2	1744.8	582.606	3	0.00797	4.57	19	35
AT3G06700.2	| Symbols: | Ribosomal L29e protein family | chr3:2117519-2117800 REVERSE LENGTH=61	AGENAsAEE	S6 Phospho	1	1000	83.07	1	46.92	25	2	956.314	479.164	2	0.00137	1.43	53	61
AT1G29930.1	| Symbols: CAB1, AB140, CAB140, LHCB1.3 | chlorophyll A/B binding protein 1 | chr1:10478071-10478874 FORWARD LENGTH=267	GPsGSPWYGSDR	S3 Phospho	1	27.96	104.1	0.9988	27.49	28.29	2	1344.52	673.266	2	0.00367	2.73	44	55
AT1G29930.1	| Symbols: CAB1, AB140, CAB140, LHCB1.3 | chlorophyll A/B binding protein 1 | chr1:10478071-10478874 FORWARD LENGTH=267	GPSGSPWYGsDR	S10 Phospho	1	46.21	255.61	1	66.81	28.29	2	1344.52	673.266	2	0.00353	2.62	44	55
AT1G29930.1	| Symbols: CAB1, AB140, CAB140, LHCB1.3 | chlorophyll A/B binding protein 1 | chr1:10478071-10478874 FORWARD LENGTH=267	GPSGsPWYGSDR	S5 Phospho	1	40.2	169.63	1	54.29	28.47	2	1344.52	673.267	2	0.00659	4.9	44	55
AT1G29930.1	| Symbols: CAB1, AB140, CAB140, LHCB1.3 | chlorophyll A/B binding protein 1 | chr1:10478071-10478874 FORWARD LENGTH=267	LSPAASEVLGsGR	S11 Phospho	1	37.49	165.47	0.9996	37.4	29.95	2	1322.63	662.322	2	0.00543	4.1	20	32
AT1G29930.1	| Symbols: CAB1, AB140, CAB140, LHCB1.3 | chlorophyll A/B binding protein 1 | chr1:10478071-10478874 FORWARD LENGTH=267	LSPAAsEVLGSGR	S6 Phospho	0.03	0	85.37	0.9443	11.69	29.93	2	1322.63	662.322	2	0.00585	4.42	20	32
AT5G63420.1	| Symbols: emb2746 | RNA-metabolising metallo-beta-lactamase family protein | chr5:25400515-25405807 FORWARD LENGTH=911	ENSRDDDELADAsDSETK	S13 Phospho	1	27.96	117.99	0.9965	19.39	29.68	2	2075.79	1038.9	2	0.00695	3.35	793	810
AT5G63420.1	| Symbols: emb2746 | RNA-metabolising metallo-beta-lactamase family protein | chr5:25400515-25405807 FORWARD LENGTH=911	DDDELADAsDSETK	S9 Phospho	1	26.2	307.53	1	67.95	27.09	2	1589.57	795.791	2	0.00533	3.35	797	810
AT5G63420.1	| Symbols: emb2746 | RNA-metabolising metallo-beta-lactamase family protein | chr5:25400515-25405807 FORWARD LENGTH=911	DDDELADASDSEtK	T13 Phospho	0.33	0	178.33	0.9965	21.04	28.31	2	1589.57	795.791	2	0.00563	3.54	797	810
AT1G75100.1	| Symbols: JAC1 | J-domain protein required for chloroplast accumulation response 1 | chr1:28191108-28193769 REVERSE LENGTH=651	SSLDSsPIPDK	S6 Phospho	0.5	0	157.88	0.9942	20.38	29.24	2	1224.53	613.274	2	0.00653	5.33	383	393
AT1G75100.1	| Symbols: JAC1 | J-domain protein required for chloroplast accumulation response 1 | chr1:28191108-28193769 REVERSE LENGTH=651	TSsKADVVSTAK	S3 Phospho	0.97	18.44	94.33	0.9925	19.25	30.47	2	1272.6	637.307	2	0.00319	2.5	171	182
AT1G75100.1	| Symbols: JAC1 | J-domain protein required for chloroplast accumulation response 1 | chr1:28191108-28193769 REVERSE LENGTH=651	GASVGAGGESLGQsSR	S14 Phospho	1	24.95	243.81	0.9989	66.69	30.63	2	1498.65	750.331	2	0.00509	3.39	424	439
AT1G75100.1	| Symbols: JAC1 | J-domain protein required for chloroplast accumulation response 1 | chr1:28191108-28193769 REVERSE LENGTH=651	HsFSESALR	S2 Phospho	1	86.89	156.92	0.9988	25.87	27.94	2	1112.47	557.241	2	0.00255	2.29	55	63
AT1G75100.1	| Symbols: JAC1 | J-domain protein required for chloroplast accumulation response 1 | chr1:28191108-28193769 REVERSE LENGTH=651	VNESSsLPGSR	S6 Phospho	0.99	21.95	141.31	0.9654	21.47	29.29	2	1211.53	606.772	2	0.0104	8.58	106	116
AT1G75100.1	| Symbols: JAC1 | J-domain protein required for chloroplast accumulation response 1 | chr1:28191108-28193769 REVERSE LENGTH=651	GAsVGAGGESLGQSSR	S3 Phospho	1	140.51	176.21	1	47.7	30.07	2	1498.62	750.319	2	-0.0175	-11.7	424	439
AT1G75100.1	| Symbols: JAC1 | J-domain protein required for chloroplast accumulation response 1 | chr1:28191108-28193769 REVERSE LENGTH=651	ETVSSSPLsR	S9 Phospho	0.97	19.23	89.68	0.9713	13.81	29.2	2	1141.51	571.76	2	0.00367	3.21	161	170
AT4G30160.1	| Symbols: VLN4, ATVLN4 | villin 4 | chr4:14754528-14759511 FORWARD LENGTH=974	NLsTPPPVVR	S3 Phospho	1	30.97	100.83	0.9984	18.97	33.06	2	1158.59	580.3	2	0.00515	4.44	804	813
AT4G30160.1	| Symbols: VLN4, ATVLN4 | villin 4 | chr4:14754528-14759511 FORWARD LENGTH=974	TPEsPAPESNSK	S4 Phospho	1	37.15	103.61	0.9942	22.54	29.07	2	1322.54	662.278	2	0.00251	1.89	863	874
AT4G30160.1	| Symbols: VLN4, ATVLN4 | villin 4 | chr4:14754528-14759511 FORWARD LENGTH=974	GRsPAFNALAATFESQNAR	S3 Phospho	1	186.05	256.9	1	45.19	32.12	2	2086.97	696.663	3	0.00981	4.7	785	803
AT4G30160.1	| Symbols: VLN4, ATVLN4 | villin 4 | chr4:14754528-14759511 FORWARD LENGTH=974	tPESPAPESNSK	T1 Phospho	0	0	116.32	0.9982	32.1	28.93	2	1322.54	662.278	2	0.00311	2.35	863	874
AT5G10470.1	| Symbols: KCA1, KAC1 | kinesin like protein for actin based chloroplast movement 1 | chr5:3290121-3297248 REVERSE LENGTH=1273	RNsISTPSLPPK	S3 Phospho	1	42.13	125.62	0.9689	13.72	29.92	2	1375.69	688.853	2	0.00515	3.74	44	55
AT5G10470.1	| Symbols: KCA1, KAC1 | kinesin like protein for actin based chloroplast movement 1 | chr5:3290121-3297248 REVERSE LENGTH=1273	SDAALLNLEEGSsPIPNPSTAAEDSR	S13 Phospho	0.33	0	56.76	0.9917	19.46	33.1	2	2720.23	1361.12	2	0.00905	3.32	1038	1063
AT5G10470.1	| Symbols: KCA1, KAC1 | kinesin like protein for actin based chloroplast movement 1 | chr5:3290121-3297248 REVERSE LENGTH=1273	AsPNIQPANVNR	S2 Phospho	1	1000	150.52	1	39.58	30.29	2	1359.64	680.825	2	0.00561	4.12	673	684
AT5G10470.1	| Symbols: KCA1, KAC1 | kinesin like protein for actin based chloroplast movement 1 | chr5:3290121-3297248 REVERSE LENGTH=1273	GEGYSAEAVALPStPNK	T14 Phospho	0.5	0	315.14	0.9986	71.43	31.73	2	1769.79	885.904	2	0.00627	3.54	685	701
AT1G73350.1	| Symbols: | unknown protein; FUNCTIONS IN: molecular_function unknown; INVOLVED IN: biological_process unknown; LOCATED IN: nucleus; EXPRESSED IN: 25 plant structures; EXPRESSED DURING: 15 growth stages; Has 46 Blast hits to 46 proteins in 19 species: Archae - 0; Bacteria - 0; Metazoa - 3; Fungi - 3; Plants - 36; Viruses - 0; Other Eukaryotes - 4 (source: NCBI BLink). | chr1:27575683-27577126 RE…	ISTPSSPSLsPPVR	S10 Phospho	0.99	21.95	106.3	0.9951	23.71	30.55	2	1503.74	752.876	2	0.00393	2.61	134	147
AT1G73350.1	| Symbols: | unknown protein; FUNCTIONS IN: molecular_function unknown; INVOLVED IN: biological_process unknown; LOCATED IN: nucleus; EXPRESSED IN: 25 plant structures; EXPRESSED DURING: 15 growth stages; Has 46 Blast hits to 46 proteins in 19 species: Archae - 0; Bacteria - 0; Metazoa - 3; Fungi - 3; Plants - 36; Viruses - 0; Other Eukaryotes - 4 (source: NCBI BLink). | chr1:27575683-27577126 RE…	ISTPSsPSLSPPVR	S6 Phospho	0.33	0	115.91	0.9928	20.77	30.48	2	1503.74	752.878	2	0.00843	5.6	134	147
AT1G73350.1	| Symbols: | unknown protein; FUNCTIONS IN: molecular_function unknown; INVOLVED IN: biological_process unknown; LOCATED IN: nucleus; EXPRESSED IN: 25 plant structures; EXPRESSED DURING: 15 growth stages; Has 46 Blast hits to 46 proteins in 19 species: Archae - 0; Bacteria - 0; Metazoa - 3; Fungi - 3; Plants - 36; Viruses - 0; Other Eukaryotes - 4 (source: NCBI BLink). | chr1:27575683-27577126 RE…	ISTPSSPsLSPPVR	S8 Phospho	0.99	25.23	152.85	0.9943	20.64	30.29	2	1503.74	752.878	2	0.00781	5.19	134	147
AT1G04080.2	| Symbols: PRP39 | Tetratricopeptide repeat (TPR)-like superfamily protein | chr1:1053171-1056550 FORWARD LENGTH=582	SQVDGSTEQsPK	S10 Phospho	1	74.63	265.47	1	89.64	28.87	2	1341.55	671.781	2	0.00285	2.12	109	120
AT1G04080.2	| Symbols: PRP39 | Tetratricopeptide repeat (TPR)-like superfamily protein | chr1:1053171-1056550 FORWARD LENGTH=582	SQVDGSTEQsPKLESASSTEPEELKK	S10 Phospho	0.94	15.47	275.33	0.9988	51.6	33.2	2	2870.32	718.587	4	0.0112	3.89	109	134
AT1G04080.2	| Symbols: PRP39 | Tetratricopeptide repeat (TPR)-like superfamily protein | chr1:1053171-1056550 FORWARD LENGTH=582	SQVDGsTEQSPK	S6 Phospho	0.33	0	86.57	0.9867	17.72	28.96	2	1341.55	671.782	2	0.00357	2.66	109	120
AT1G04080.2	| Symbols: PRP39 | Tetratricopeptide repeat (TPR)-like superfamily protein | chr1:1053171-1056550 FORWARD LENGTH=582	SQVDGSTEQsPKLESASSTEPEELK	S10 Phospho	0.33	0	202.85	0.9933	25.54	33.23	2	2742.22	915.081	3	0.00908	3.31	109	133
AT1G53165.1	| Symbols: ATMAP4K ALPHA1 | Protein kinase superfamily protein | chr1:19814386-19819233 FORWARD LENGTH=680	SQQVsDDEEDDSK	S5 Phospho	1	92.54	176.54	1	35.6	26.9	2	1560.56	781.286	2	0.0113	7.22	543	555
AT1G53165.1	| Symbols: ATMAP4K ALPHA1 | Protein kinase superfamily protein | chr1:19814386-19819233 FORWARD LENGTH=680	EFSsNANFSPLAR	S4 Phospho	0.5	0	150.13	0.9979	31.02	30.8	2	1518.66	760.335	2	0.00555	3.65	651	663
AT1G53165.1	| Symbols: ATMAP4K ALPHA1 | Protein kinase superfamily protein | chr1:19814386-19819233 FORWARD LENGTH=680	SSsASEDSISNLAEAK	S3 Phospho	1	26.2	240.03	0.9986	60.97	30.64	2	1674.7	838.359	2	0.00519	3.1	477	492
AT3G48060.1	| Symbols: | BAH domain ;TFIIS helical bundle-like domain | chr3:17743234-17748372 REVERSE LENGTH=1611	ENILDDSDsGEVK	S9 Phospho	0.01	0	127.22	0.9934	27.25	29.86	2	1499.6	750.809	2	0.00107	0.712	904	916
AT4G32285.1	| Symbols: | ENTH/ANTH/VHS superfamily protein | chr4:15586003-15587910 FORWARD LENGTH=635	sFGDVNEIGAR	S1 Phospho	1	1000	226.46	1	86.59	29.23	2	1243.53	622.771	2	0.00457	3.67	207	217
AT4G32285.1	| Symbols: | ENTH/ANTH/VHS superfamily protein | chr4:15586003-15587910 FORWARD LENGTH=635	SRsFGDVNEIGAR	S3 Phospho	0.99	20.77	199.88	0.9925	20.13	30.7	2	1486.66	744.337	2	0.00297	2	205	217
AT4G32285.1	| Symbols: | ENTH/ANTH/VHS superfamily protein | chr4:15586003-15587910 FORWARD LENGTH=635	DDFRsPPPR	S5 Phospho	1	1000	76.64	0.9291	8.64	28.1	2	1165.5	583.756	2	0.00587	5.03	181	189
AT5G46070.1	| Symbols: | Guanylate-binding family protein | chr5:18683468-18688397 FORWARD LENGTH=1082	DSPADSASPsPR	S10 Phospho	1	74.96	265	0.9985	68.15	28.14	2	1265.5	633.755	2	0.00295	2.33	11	22
AT5G46070.1	| Symbols: | Guanylate-binding family protein | chr5:18683468-18688397 FORWARD LENGTH=1082	GGKDsPADSASPSPR	S5 Phospho	1	20.37	88.59	0.9645	9.84	30.11	2	1507.63	503.552	3	0.00336	2.23	8	22
AT5G46070.1	| Symbols: | Guanylate-binding family protein | chr5:18683468-18688397 FORWARD LENGTH=1082	GGKDSPADSASPsPR	S13 Phospho	1	50.64	370.02	0.9995	77.42	30.15	2	1507.63	754.824	2	0.00323	2.14	8	22
AT5G46070.1	| Symbols: | Guanylate-binding family protein | chr5:18683468-18688397 FORWARD LENGTH=1082	DSPADSAsPSPR	S8 Phospho	0.33	0	187.54	0.9988	46.41	28.33	2	1265.5	633.756	2	0.00463	3.65	11	22
AT5G46070.1	| Symbols: | Guanylate-binding family protein | chr5:18683468-18688397 FORWARD LENGTH=1082	GGKDSPADSAsPSPR	S11 Phospho	0.33	0	86.04	0.9962	26.09	30.16	2	1507.64	754.825	2	0.00511	3.39	8	22
AT3G15450.1	| Symbols: | Aluminium induced protein with YGL and LRDR motifs | chr3:5213050-5213998 FORWARD LENGTH=253	IDsEGVLcGASFK	S3 Phospho	1	109.69	108.84	0.9962	12.59	30.73	2	1461.63	731.821	2	0.0059	4.04	216	228
AT3G15450.1	| Symbols: | Aluminium induced protein with YGL and LRDR motifs | chr3:5213050-5213998 FORWARD LENGTH=253	RGsEANWALANSR	S3 Phospho	1	169.91	159.23	0.9991	24.98	30.9	2	1510.67	756.343	2	0.00283	1.87	241	253
AT3G15450.1	| Symbols: | Aluminium induced protein with YGL and LRDR motifs | chr3:5213050-5213998 FORWARD LENGTH=253	IDSEGVLcGAsFK	S11 Phospho	1	114.24	156.84	1	39.22	30.75	2	1461.63	731.822	2	0.00784	5.36	216	228
AT5G10470.2	| Symbols: KAC1 | kinesin like protein for actin based chloroplast movement 1 | chr5:3290121-3297248 REVERSE LENGTH=1274	AsPNIQPANVNSR	S2 Phospho	1	196.95	149.37	0.9995	30.71	31.48	2	1446.67	724.341	2	0.00535	3.69	673	685
AT1G08420.2	| Symbols: BSL2 | BRI1 suppressor 1 (BSU1)-like 2 | chr1:2649959-2656564 FORWARD LENGTH=1013	QLsIDQFENEGR	S3 Phospho	1	1000	233.26	1	68.99	30.16	2	1514.65	758.332	2	0.00805	5.31	620	631
AT1G08420.2	| Symbols: BSL2 | BRI1 suppressor 1 (BSU1)-like 2 | chr1:2649959-2656564 FORWARD LENGTH=1013	LIHPLPPALSsPETSPER	S11 Phospho	0.5	0	155.74	0.987	26.04	30.84	2	2020.02	674.346	3	0.0141	6.99	960	977
AT2G38410.1	| Symbols: | ENTH/VHS/GAT family protein | chr2:16086912-16090047 REVERSE LENGTH=671	DSSSIAGSSsPIPATVSTGK	S10 Phospho	0.33	0	141.42	0.9944	42.26	31.72	2	1927.89	964.953	2	0.013	6.76	349	368
AT2G38410.1	| Symbols: | ENTH/VHS/GAT family protein | chr2:16086912-16090047 REVERSE LENGTH=671	SLQQSNsFPTR	S7 Phospho	1	72.58	169.11	0.9996	34.29	29.93	2	1343.59	672.804	2	0.00571	4.25	590	600
AT2G38410.1	| Symbols: | ENTH/VHS/GAT family protein | chr2:16086912-16090047 REVERSE LENGTH=671	HDAIASGSPLPVQASGSPLSVQAsKPADSSPK	S24 Phospho	0.25	0	130.51	0.9936	30.99	31.65	2	3165.55	1056.19	3	0.0178	5.61	312	343
AT2G38410.1	| Symbols: | ENTH/VHS/GAT family protein | chr2:16086912-16090047 REVERSE LENGTH=671	DSSsIAGSSSPIPATVSTGK	S4 Phospho	0.17	0	94.21	0.9389	12.82	31.8	2	1927.88	643.635	3	0.00517	2.68	349	368
AT2G38410.1	| Symbols: | ENTH/VHS/GAT family protein | chr2:16086912-16090047 REVERSE LENGTH=671	RsPDASPIITPPVSHPPLR	S2 Phospho	1	33.47	227.57	0.9989	25.85	29.59	2	2116.09	706.37	3	0.00604	2.85	146	164
AT2G38410.1	| Symbols: | ENTH/VHS/GAT family protein | chr2:16086912-16090047 REVERSE LENGTH=671	DSsSIAGSSSPIPATVSTGK	S3 Phospho	0.17	0	116.8	0.9868	23.87	31.72	2	1927.89	643.638	3	0.013	6.73	349	368
AT2G27210.2	| Symbols: BSL3 | BRI1 suppressor 1 (BSU1)-like 3 | chr2:11630188-11636182 FORWARD LENGTH=1001	LIHPLPPAITsPETSPER	S11 Phospho	0.25	0	121.77	0.9946	31.37	30.45	2	2034.03	679.017	3	0.0114	5.62	949	966
AT4G00238.1	| Symbols: | DNA-binding storekeeper protein-related transcriptional regulator | chr4:104092-105129 REVERSE LENGTH=345	sGNNEGATESPAVK	S1 Phospho	1	169.52	246.49	1	62.5	29.54	2	1439.6	720.807	2	0.00591	4.1	96	109
AT4G00238.1	| Symbols: | DNA-binding storekeeper protein-related transcriptional regulator | chr4:104092-105129 REVERSE LENGTH=345	SGNNEGATEsPAVK	S10 Phospho	1	24.95	150.75	0.9979	28.06	29.53	2	1439.6	720.808	2	0.00783	5.43	96	109
AT4G00238.1	| Symbols: | DNA-binding storekeeper protein-related transcriptional regulator | chr4:104092-105129 REVERSE LENGTH=345	EGAAEsPAVK	S6 Phospho	1	1000	78.6	0.9695	9.61	27.32	2	1037.45	519.731	2	0.00501	4.82	72	81
AT5G42950.1	| Symbols: | GYF domain-containing protein | chr5:17224436-17231044 FORWARD LENGTH=1714	RQPsLVFDR	S4 Phospho	1	1000	120.84	1	35.33	30.48	2	1196.58	599.295	2	0.00587	4.9	524	532
AT5G42950.1	| Symbols: | GYF domain-containing protein | chr5:17224436-17231044 FORWARD LENGTH=1714	SASsPSQAVSQSSSQSK	S4 Phospho	0.49	0	205.72	0.9986	55.01	31.23	2	1731.74	866.875	2	0.00527	3.04	1472	1488
AT5G42950.1	| Symbols: | GYF domain-containing protein | chr5:17224436-17231044 FORWARD LENGTH=1714	SAsSPSQAVSQSSSQSK	S3 Phospho	1	30.97	340.54	0.9956	118.8	31.19	2	1731.74	866.876	2	0.00541	3.12	1472	1488
AT5G42950.1	| Symbols: | GYF domain-containing protein | chr5:17224436-17231044 FORWARD LENGTH=1714	SASSPSQAVSQSSsQSK	S14 Phospho	0.2	0	131.1	0.9957	23.07	31.17	2	1731.74	866.875	2	0.00503	2.9	1472	1488
AT5G42950.1	| Symbols: | GYF domain-containing protein | chr5:17224436-17231044 FORWARD LENGTH=1714	sIPSPYSYWPGR	S1 Phospho	1	56.2	89.95	0.9937	18.65	30.33	2	1488.64	745.328	2	-0.00169	-1.14	716	727
AT5G42950.1	| Symbols: | GYF domain-containing protein | chr5:17224436-17231044 FORWARD LENGTH=1714	SASSPSQAVSQSSSQsK	S16 Phospho	0.2	0	89.41	0.9481	13.14	31.23	2	1731.74	866.875	2	0.00533	3.07	1472	1488
AT5G42950.1	| Symbols: | GYF domain-containing protein | chr5:17224436-17231044 FORWARD LENGTH=1714	QGDFPHLTSQNsWGTK	S12 Phospho	0.97	18.44	195.02	0.9996	45.22	31.26	2	1881.81	941.913	2	0.00649	3.45	1509	1524
AT5G42950.1	| Symbols: | GYF domain-containing protein | chr5:17224436-17231044 FORWARD LENGTH=1714	SASSPSQAVsQSSSQSK	S10 Phospho	1	23.2	133.6	0.9959	23.81	31.28	2	1731.74	866.877	2	0.00811	4.68	1472	1488
AT5G03730.1	| Symbols: CTR1, SIS1, AtCTR1 | Protein kinase superfamily protein | chr5:974958-979660 REVERSE LENGTH=821	TsPSSAETVSHR	S2 Phospho	0.5	0	133.33	0.9957	23.62	29.52	2	1337.57	669.791	2	0.00631	4.71	203	214
AT1G80490.1	| Symbols: TPR1 | TOPLESS-related 1 | chr1:30261094-30266446 REVERSE LENGTH=1119	APsPVNNPLLGSLPK	S3 Phospho	1	63.83	74.25	0.9432	7.48	29.42	2	1582.82	792.416	2	0.00525	3.31	212	226
AT1G80490.1	| Symbols: TPR1 | TOPLESS-related 1 | chr1:30261094-30266446 REVERSE LENGTH=1119	tPPSNSAVDYPSGDSDHVSK	T1 Phospho	1	26.2	149.77	0.9996	46.41	31.54	2	2138.89	1070.45	2	0.00575	2.69	285	304
AT5G57610.1	| Symbols: | Protein kinase superfamily protein with octicosapeptide/Phox/Bem1p domain | chr5:23325307-23329099 FORWARD LENGTH=1054	LQQYPDsPR	S7 Phospho	1	67.98	152.38	0.9991	20.85	29.41	2	1182.51	592.264	2	0.00529	4.47	163	171
AT5G57610.1	| Symbols: | Protein kinase superfamily protein with octicosapeptide/Phox/Bem1p domain | chr5:23325307-23329099 FORWARD LENGTH=1054	KLQQYPDsPR	S8 Phospho	0.98	17.2	83.16	0.9989	18.94	30.24	2	1310.61	656.311	2	0.00439	3.35	162	171
AT5G57610.1	| Symbols: | Protein kinase superfamily protein with octicosapeptide/Phox/Bem1p domain | chr5:23325307-23329099 FORWARD LENGTH=1054	TFQEFPSsPSSAR	S8 Phospho	0.99	21.43	133.76	0.9356	11.14	30.43	2	1519.64	760.828	2	0.00613	4.03	251	263
AT3G28920.1	| Symbols: AtHB34, HB34, ZHD9 | homeobox protein 34 | chr3:10940598-10941536 REVERSE LENGTH=312	sPEPESETPTR	S1 Phospho	1	162.6	185.49	1	51.98	28.81	2	1308.53	655.271	2	0.00461	3.52	13	23
AT3G28920.1	| Symbols: AtHB34, HB34, ZHD9 | homeobox protein 34 | chr3:10940598-10941536 REVERSE LENGTH=312	NDNGIGGENsNDDGVR	S10 Phospho	1	1000	226.07	1	57.29	28.95	2	1711.66	856.835	2	0.0115	6.7	264	279
AT3G13920.1	| Symbols: EIF4A1, RH4, TIF4A1 | eukaryotic translation initiation factor 4A1 | chr3:4592635-4594128 REVERSE LENGTH=412	VHAcVGGTsVR	S9 Phospho	0	0	187.83	0.9961	23.07	28.98	2	1221.54	611.776	2	0.00396	3.24	138	148
AT3G13920.1	| Symbols: EIF4A1, RH4, TIF4A1 | eukaryotic translation initiation factor 4A1 | chr3:4592635-4594128 REVERSE LENGTH=412	VHAcVGGtSVR	T8 Phospho	1	23.98	195.11	0.9988	35.86	29	2	1221.54	611.776	2	0.00532	4.35	138	148
AT3G13920.1	| Symbols: EIF4A1, RH4, TIF4A1 | eukaryotic translation initiation factor 4A1 | chr3:4592635-4594128 REVERSE LENGTH=412	AGsAPEGTQFDAR	S3 Phospho	1	123.45	171.32	1	63.65	28.45	1	1385.57	693.791	2	0.00581	4.19	2	14
AT2G02070.1	| Symbols: AtIDD5, IDD5 | indeterminate(ID)-domain 5 | chr2:505523-509154 FORWARD LENGTH=602	TPNSDAEVIALsPK	S12 Phospho	1	210.53	252.16	1	42	30.7	2	1520.72	761.367	2	0.00699	4.59	60	73
AT2G30710.1	| Symbols: | Ypt/Rab-GAP domain of gyp1p superfamily protein | chr2:13086147-13088991 REVERSE LENGTH=440	SLsENDAGR	S3 Phospho	1	60.18	167.66	0.9994	42.14	25.89	2	1027.4	514.708	2	0.00375	3.64	56	64
AT2G30710.1	| Symbols: | Ypt/Rab-GAP domain of gyp1p superfamily protein | chr2:13086147-13088991 REVERSE LENGTH=440	SDPPPYPIsPTYQR	S9 Phospho	0.99	24.95	117.98	0.9968	20.23	31.31	2	1696.76	849.386	2	0.00809	4.76	42	55
AT2G30710.1	| Symbols: | Ypt/Rab-GAP domain of gyp1p superfamily protein | chr2:13086147-13088991 REVERSE LENGTH=440	SDPPPYPISPtYQR	T11 Phospho	0	0	124.72	0.9675	15.9	31.32	2	1696.75	849.384	2	0.00427	2.51	42	55
AT5G67220.1	| Symbols: | FMN-linked oxidoreductases superfamily protein | chr5:26820276-26821926 REVERSE LENGTH=423	DGQIEETVDTAPASLGsPSR	S17 Phospho	0.99	23.2	438.46	0.999	88.37	32.24	2	2108.94	1055.48	2	0.00985	4.67	48	67
AT5G67220.1	| Symbols: | FMN-linked oxidoreductases superfamily protein | chr5:26820276-26821926 REVERSE LENGTH=423	IDTLTPQDsPQRV	S9 Phospho	1	63.52	113	0.9424	10.85	34.86	2	1548.72	775.368	2	0.00237	1.53	411	423
AT5G67220.1	| Symbols: | FMN-linked oxidoreductases superfamily protein | chr5:26820276-26821926 REVERSE LENGTH=423	IDTLTPQDsPQR	S9 Phospho	1	34.46	95.06	0.9346	8.19	30.16	2	1449.66	725.836	2	0.00765	5.27	411	422
AT2G17290.1	| Symbols: CPK6, ATCDPK3, ATCPK6 | Calcium-dependent protein kinase family protein | chr2:7517005-7519239 FORWARD LENGTH=544	STTTtVSSVHSPTTDQDFSK	T5 Phospho	0.14	0	84.81	0.9826	17.71	32.1	2	2204.96	1103.49	2	0.0106	4.83	27	46
AT2G17290.1	| Symbols: CPK6, ATCDPK3, ATCPK6 | Calcium-dependent protein kinase family protein | chr2:7517005-7519239 FORWARD LENGTH=544	STTTTVSSVHsPTTDQDFSK	S11 Phospho	1	27.96	173.15	0.9989	35.17	32.13	2	2204.96	1103.49	2	0.00845	3.83	27	46
AT3G46440.1	| Symbols: UXS5 | UDP-XYL synthase 5 | chr3:17089268-17091611 REVERSE LENGTH=341	QTSPKPPPsPSPLR	S9 Phospho	1	20.2	106.74	0.9836	14.84	30.6	2	1567.78	523.601	3	0.00497	3.17	7	20
AT3G46440.1	| Symbols: UXS5 | UDP-XYL synthase 5 | chr3:17089268-17091611 REVERSE LENGTH=341	QTsPKPPPSPSPLR	S3 Phospho	0.5	0	101.56	0.9958	22.08	30.57	2	1567.78	784.898	2	0.00605	3.86	7	20
AT3G46440.1	| Symbols: UXS5 | UDP-XYL synthase 5 | chr3:17089268-17091611 REVERSE LENGTH=341	QtSPKPPPSPSPLR	T2 Phospho	0.5	0	108.49	0.996	24.61	30.6	2	1567.78	784.898	2	0.00511	3.26	7	20
AT5G55230.2	| Symbols: MAP65-1 | microtubule-associated proteins 65-1 | chr5:22402716-22405182 FORWARD LENGTH=616	EEAASSPVSGAADHQVPAsP	S19 Phospho	1	196.12	320.52	1	59.87	31.31	2	1985.84	993.929	2	0.00663	3.34	597	616
AT5G55230.2	| Symbols: MAP65-1 | microtubule-associated proteins 65-1 | chr5:22402716-22405182 FORWARD LENGTH=616	EEAAsSPVSGAADHQVPASP	S5 Phospho	0.25	0	53.64	0.9515	13.45	31.33	2	1985.84	662.955	3	0.00646	3.25	597	616
AT1G34220.2	| Symbols: | Regulator of Vps4 activity in the MVB pathway protein | chr1:12463102-12465911 REVERSE LENGTH=619	QNsSFSSYGDLTPQR	S3 Phospho	1	55.92	279.44	0.9994	116.9	30.77	2	1765.74	883.875	2	0.00539	3.05	467	481
AT1G34220.2	| Symbols: | Regulator of Vps4 activity in the MVB pathway protein | chr1:12463102-12465911 REVERSE LENGTH=619	NYsPPSIDAVGPIPTK	S3 Phospho	1	26.2	223.26	0.9997	64.92	30.98	2	1734.83	868.422	2	0.00635	3.66	325	340
AT1G34220.2	| Symbols: | Regulator of Vps4 activity in the MVB pathway protein | chr1:12463102-12465911 REVERSE LENGTH=619	QNSsFSSYGDLTPQR	S4 Phospho	0.5	0	199.1	0.9986	52.24	30.77	2	1765.74	883.876	2	0.00573	3.24	467	481
AT1G34220.2	| Symbols: | Regulator of Vps4 activity in the MVB pathway protein | chr1:12463102-12465911 REVERSE LENGTH=619	QNSSFSSyGDLTPQR	Y8 Phospho	0.2	0	98.64	0.9921	20.27	30.85	2	1765.74	589.588	3	0.00992	5.62	467	481
AT1G34220.2	| Symbols: | Regulator of Vps4 activity in the MVB pathway protein | chr1:12463102-12465911 REVERSE LENGTH=619	QNSSFsSYGDLTPQR	S6 Phospho	0.01	0	157.28	0.9954	58.58	30.93	2	1765.74	883.879	2	0.012	6.82	467	481
AT3G23900.1	| Symbols: | RNA recognition motif (RRM)-containing protein | chr3:8631941-8635852 REVERSE LENGTH=987	sVEDSADIKDK	S1 Phospho	1	84.46	148.18	1	37.47	29.59	2	1285.55	643.783	2	0.00717	5.57	661	671
AT3G23900.1	| Symbols: | RNA recognition motif (RRM)-containing protein | chr3:8631941-8635852 REVERSE LENGTH=987	VDDGDANsDSSQQER	S8 Phospho	1	50.64	211.03	1	44.99	27.85	2	1701.62	851.815	2	0.00397	2.33	921	935
AT3G23900.1	| Symbols: | RNA recognition motif (RRM)-containing protein | chr3:8631941-8635852 REVERSE LENGTH=987	SKENPPSSSsVER	S10 Phospho	0.25	0	140.14	0.9987	45.31	30.16	2	1482.64	742.327	2	0.00499	3.36	955	967
AT3G23900.1	| Symbols: | RNA recognition motif (RRM)-containing protein | chr3:8631941-8635852 REVERSE LENGTH=987	sVEDSADIK	S1 Phospho	1	75.44	109.37	0.9989	20.38	27.12	2	1042.43	522.221	2	0.00505	4.84	661	669
AT3G23900.1	| Symbols: | RNA recognition motif (RRM)-containing protein | chr3:8631941-8635852 REVERSE LENGTH=987	ENPPSSSsVER	S8 Phospho	0.25	0	119.62	0.9966	28.36	28.54	2	1267.51	634.764	2	0.00455	3.59	957	967
AT5G12350.1	| Symbols: | Regulator of chromosome condensation (RCC1) family with FYVE zinc finger domain | chr5:3995789-4000545 FORWARD LENGTH=1075	SDGTPSEANsPR	S10 Phospho	1	39.54	122.57	0.9778	15.06	28.29	2	1296.5	649.257	2	0.00185	1.42	142	153
AT5G12350.1	| Symbols: | Regulator of chromosome condensation (RCC1) family with FYVE zinc finger domain | chr5:3995789-4000545 FORWARD LENGTH=1075	STtPTPTLSGLATPK	T3 Phospho	1	27.96	140.6	0.9953	28.57	30.66	2	1550.76	776.389	2	0.00401	2.58	843	857
AT5G12350.1	| Symbols: | Regulator of chromosome condensation (RCC1) family with FYVE zinc finger domain | chr5:3995789-4000545 FORWARD LENGTH=1075	FFSAsVPGSR	S5 Phospho	1	24.95	121.66	1	41.61	29.69	2	1133.49	567.754	2	0.00305	2.69	816	825
AT5G12350.1	| Symbols: | Regulator of chromosome condensation (RCC1) family with FYVE zinc finger domain | chr5:3995789-4000545 FORWARD LENGTH=1075	SPPSLNSFGSsPGR	S11 Phospho	0.99	23.19	221.62	0.9985	33.05	30.11	2	1468.64	735.328	2	0.00565	3.84	947	960
AT5G12350.1	| Symbols: | Regulator of chromosome condensation (RCC1) family with FYVE zinc finger domain | chr5:3995789-4000545 FORWARD LENGTH=1075	SFNPVFGAsK	S9 Phospho	1	45.98	43.9	0.999	16.81	29.16	2	1132.5	567.257	2	0.00405	3.57	805	814
AT4G24275.1	| Symbols: | Identified as a screen for stress-responsive genes. | chr4:12588579-12588959 FORWARD LENGTH=126	sVSASAQAVPSPIK	S1 Phospho	1	54.16	249.81	0.9992	77	30.5	2	1420.7	711.359	2	0.00679	4.77	44	57
AT4G24275.1	| Symbols: | Identified as a screen for stress-responsive genes. | chr4:12588579-12588959 FORWARD LENGTH=126	SVsASAQAVPSPIK	S3 Phospho	1	26.2	163.97	0.992	45.84	30.37	2	1420.71	711.361	2	0.0118	8.29	44	57
AT1G21630.1	| Symbols: | Calcium-binding EF hand family protein | chr1:7581457-7587796 FORWARD LENGTH=1218	YDsFNAQSYDSSSNNNASETPK	S3 Phospho	0.5	0	306.07	0.9985	98.32	30.87	2	2504.97	1253.49	2	0.00605	2.41	1143	1164
AT1G21630.1	| Symbols: | Calcium-binding EF hand family protein | chr1:7581457-7587796 FORWARD LENGTH=1218	GIEADSsPR	S7 Phospho	0.99	21.95	147.28	0.9963	25.73	26.99	2	1010.41	506.213	2	0.00347	3.43	861	869
AT1G21630.1	| Symbols: | Calcium-binding EF hand family protein | chr1:7581457-7587796 FORWARD LENGTH=1218	KGIEADSsPR	S8 Phospho	0.5	0	84.44	0.9965	30.31	29.25	2	1138.51	570.261	2	0.00483	4.24	860	869
AT1G21630.1	| Symbols: | Calcium-binding EF hand family protein | chr1:7581457-7587796 FORWARD LENGTH=1218	FDsFNYQR	S3 Phospho	1	93.05	174.76	0.99	44.93	26.77	2	1155.44	578.729	2	0.00455	3.93	1135	1142
AT1G21630.1	| Symbols: | Calcium-binding EF hand family protein | chr1:7581457-7587796 FORWARD LENGTH=1218	StSEPDPFASR	T2 Phospho	1	30.97	129.09	0.9532	12.72	28.32	2	1272.51	637.261	2	0.00501	3.93	1124	1134
AT1G21630.1	| Symbols: | Calcium-binding EF hand family protein | chr1:7581457-7587796 FORWARD LENGTH=1218	YDSFNAQSyDSSSNNNASETPK	Y9 Phospho	0.25	0	112.54	0.932	10.93	30.87	2	2504.97	835.997	3	0.00727	2.9	1143	1164
AT1G21630.1	| Symbols: | Calcium-binding EF hand family protein | chr1:7581457-7587796 FORWARD LENGTH=1218	STsEPDPFASR	S3 Phospho	0.33	0	78.07	0.9605	13.49	28.32	2	1272.51	637.261	2	0.00543	4.26	1124	1134
AT1G21630.1	| Symbols: | Calcium-binding EF hand family protein | chr1:7581457-7587796 FORWARD LENGTH=1218	FDsFNSNNNDAFSLSR	S3 Phospho	1	56.2	249.32	0.9971	134.6	30.59	2	1913.76	957.887	2	0.00125	0.652	1103	1118
AT1G21630.1	| Symbols: | Calcium-binding EF hand family protein | chr1:7581457-7587796 FORWARD LENGTH=1218	YDSFNAQsYDSSSNNNASETPK	S8 Phospho	0.36	17.18	180.65	0.9981	39.37	30.97	2	2504.97	835.998	3	0.0124	4.95	1143	1164
AT3G48740.1	| Symbols: SWEET11, AtSWEET11 | Nodulin MtN3 family protein | chr3:18052814-18054663 REVERSE LENGTH=289	AEIEDGQtPK	T8 Phospho	1	1000	180.51	1	39.98	28.52	2	1166.49	584.253	2	0.00571	4.89	269	278
AT3G48740.1	| Symbols: SWEET11, AtSWEET11 | Nodulin MtN3 family protein | chr3:18052814-18054663 REVERSE LENGTH=289	LGTVSsPEPISVVR	S6 Phospho	1	26.2	122.06	0.9469	13.06	30.19	2	1519.77	760.894	2	0.00793	5.21	243	256
AT3G48740.1	| Symbols: SWEET11, AtSWEET11 | Nodulin MtN3 family protein | chr3:18052814-18054663 REVERSE LENGTH=289	RAEIEDGQtPK	T9 Phospho	1	1000	150.51	0.9989	17.95	29.86	2	1322.59	662.303	2	0.00541	4.09	268	278
AT5G47480.1	| Symbols: | RGPR-related | chr5:19257420-19263132 FORWARD LENGTH=1350	SGSGtSLNGDLPQSVSR	T5 Phospho	0.33	0	204.14	0.9982	65.42	31.45	2	1740.77	871.393	2	0.00401	2.3	1290	1306
AT5G47480.1	| Symbols: | RGPR-related | chr5:19257420-19263132 FORWARD LENGTH=1350	SVsEPDFSR	S3 Phospho	1	54.16	150.3	0.9991	31.67	26.95	2	1102.44	552.226	2	0.00401	3.63	1028	1036
AT5G47480.1	| Symbols: | RGPR-related | chr5:19257420-19263132 FORWARD LENGTH=1350	ESNIVDGSGsPGVK	S10 Phospho	1	23.2	236.5	0.9989	47.36	30.29	2	1424.62	713.319	2	0.00519	3.64	131	144
AT5G47480.1	| Symbols: | RGPR-related | chr5:19257420-19263132 FORWARD LENGTH=1350	sGSGTSLNGDLPQSVSR	S1 Phospho	0.25	0	120.87	0.9428	27.21	31.3	2	1740.76	871.388	2	-0.00717	-4.12	1290	1306
AT5G47480.1	| Symbols: | RGPR-related | chr5:19257420-19263132 FORWARD LENGTH=1350	SFQNNQLFsPSVGR	S9 Phospho	1	27.96	49.79	0.9892	26.35	31.3	2	1659.76	830.885	2	0.0149	8.98	501	514
AT5G47480.1	| Symbols: | RGPR-related | chr5:19257420-19263132 FORWARD LENGTH=1350	FPsVDNIR	S3 Phospho	1	1000	109.23	0.99	22.94	29.4	2	1026.46	514.237	2	0.00579	5.63	1281	1288
AT5G47480.1	| Symbols: | RGPR-related | chr5:19257420-19263132 FORWARD LENGTH=1350	LVDDSYTPTASSsAK	S13 Phospho	0.33	0	270.85	0.9974	33.73	30.8	2	1620.7	811.355	2	0.00327	2.02	21	35
AT5G47480.1	| Symbols: | RGPR-related | chr5:19257420-19263132 FORWARD LENGTH=1350	LVDDSYtPTASSSAK	T7 Phospho	1	27.96	298.7	0.9997	66.43	30.94	2	1620.7	811.356	2	0.00601	3.7	21	35
AT5G47480.1	| Symbols: | RGPR-related | chr5:19257420-19263132 FORWARD LENGTH=1350	SGsGTSLNGDLPQSVSR	S3 Phospho	0.01	0	120.14	0.9314	20.99	31.3	2	1740.76	871.387	2	-0.00799	-4.59	1290	1306
AT1G78880.1	| Symbols: | Ubiquitin-specific protease family C19-related protein | chr1:29653068-29654819 REVERSE LENGTH=468	sGPITGGSSR	S1 Phospho	1	53.49	74.25	0.9802	12.18	28.52	2	997.423	499.719	2	-0.000112	-0.112	64	73
AT1G78880.1	| Symbols: | Ubiquitin-specific protease family C19-related protein | chr1:29653068-29654819 REVERSE LENGTH=468	sGAQSGPVPNATGR	S1 Phospho	1	84.46	199.26	0.9988	47.17	30.43	2	1377.61	689.812	2	0.00483	3.5	74	87
AT1G78880.1	| Symbols: | Ubiquitin-specific protease family C19-related protein | chr1:29653068-29654819 REVERSE LENGTH=468	SGAQsGPVPNATGR	S5 Phospho	1	72.17	198.31	0.9987	40.25	30.49	2	1377.61	689.811	2	0.00389	2.82	74	87
AT2G32080.2	| Symbols: PUR ALPHA-1 | purin-rich alpha 1 | chr2:13642716-13644036 REVERSE LENGTH=295	AVTGGGGGGGGsDVELVSK	S12 Phospho	1	32.23	155.85	1	59.66	31.45	2	1682.76	842.387	2	0.00783	4.65	16	34
AT3G22380.2	| Symbols: TIC | time for coffee | chr3:7913181-7918967 FORWARD LENGTH=1555	QISSTsPANR	S6 Phospho	0.97	20.19	120.2	0.9989	32.12	29.41	2	1139.5	570.758	2	0.00395	3.46	242	251
AT3G22380.2	| Symbols: TIC | time for coffee | chr3:7913181-7918967 FORWARD LENGTH=1555	AGSFRDsPEEEGPVELPEAAR	S7 Phospho	1	24.95	158.05	0.9975	31.99	32.52	2	2322.03	1162.02	2	0.00935	4.02	26	46
AT3G22380.2	| Symbols: TIC | time for coffee | chr3:7913181-7918967 FORWARD LENGTH=1555	SGSIGGAATANNtPEEQR	T13 Phospho	1	41.18	87.65	0.9813	20.6	35.32	2	2758.19	920.403	3	919	-34	1093	1110
AT3G22380.2	| Symbols: TIC | time for coffee | chr3:7913181-7918967 FORWARD LENGTH=1555	SSPSPAPVsPLVSTWK	S9 Phospho	1	57.86	131.54	0.9986	20.22	34.51	2	1718.84	860.425	2	0.00781	4.54	182	197
AT3G22380.2	| Symbols: TIC | time for coffee | chr3:7913181-7918967 FORWARD LENGTH=1555	VESSSGFRsDGEGAK	S9 Phospho	0.25	0	87.08	0.9942	26.26	30.22	2	1591.65	796.835	2	0.00291	1.83	465	479
AT3G22380.2	| Symbols: TIC | time for coffee | chr3:7913181-7918967 FORWARD LENGTH=1555	NLQPASAASsAGGR	S10 Phospho	0.5	0	111.77	0.9543	15.19	30.14	2	1365.61	683.813	2	0.00787	5.76	1394	1407
AT3G22380.2	| Symbols: TIC | time for coffee | chr3:7913181-7918967 FORWARD LENGTH=1555	ENATQHSETVGEDsPSTADSR	S14 Phospho	1	22.53	79.03	0.9972	19.05	30.94	2	2296.91	1149.46	2	0.00605	2.63	949	969
AT3G22380.2	| Symbols: TIC | time for coffee | chr3:7913181-7918967 FORWARD LENGTH=1555	VSPASILASPSPPAPTsPSSSSISVR	S17 Phospho	0.45	0	163.09	0.9554	17.53	31.57	2	2558.27	853.762	3	0.00253	0.989	252	277
AT3G22380.2	| Symbols: TIC | time for coffee | chr3:7913181-7918967 FORWARD LENGTH=1555	SsPSPAPVSPLVSTWK	S2 Phospho	0.5	0	171.64	0.9935	46.87	30.86	2	1718.83	860.422	2	0.000488	0.284	182	197
AT3G22380.2	| Symbols: TIC | time for coffee | chr3:7913181-7918967 FORWARD LENGTH=1555	SSPsPAPVSPLVSTWK	S4 Phospho	0.33	0	84.43	0.9961	22.37	30.78	2	1718.83	860.424	2	0.00605	3.52	182	197
AT3G22380.2	| Symbols: TIC | time for coffee | chr3:7913181-7918967 FORWARD LENGTH=1555	DsPEEEGPVELPEAAR	S2 Phospho	1	1000	100.59	0.9934	16.28	30.88	2	1803.77	902.892	2	0.0135	7.5	31	46
AT3G58600.1	| Symbols: | Adaptin ear-binding coat-associated protein 1 NECAP-1 | chr3:21668746-21670999 REVERSE LENGTH=302	sPSSLPPSLSLQR	S1 Phospho	1	24.95	139.83	0.9955	25.54	30.48	2	1447.71	724.864	2	0.00695	4.8	246	258
AT3G58600.1	| Symbols: | Adaptin ear-binding coat-associated protein 1 NECAP-1 | chr3:21668746-21670999 REVERSE LENGTH=302	SPsSLPPSLSLQR	S3 Phospho	0.01	1.24	110.09	0.9187	15.74	30.36	2	1447.72	724.866	2	0.0101	6.98	246	258
AT3G58600.1	| Symbols: | Adaptin ear-binding coat-associated protein 1 NECAP-1 | chr3:21668746-21670999 REVERSE LENGTH=302	SsEQQDLDTK	S2 Phospho	0.99	23.19	115.21	0.9608	14.04	27.61	2	1229.49	615.751	2	0.00565	4.59	259	268
AT1G68370.1	| Symbols: ARG1 | Chaperone DnaJ-domain superfamily protein | chr1:25632046-25634527 REVERSE LENGTH=410	GDGDsAGEEGGTENR	S5 Phospho	1	121.86	128.04	1	48.99	26.42	2	1529.53	765.773	2	0.00347	2.27	376	390
AT1G68370.1	| Symbols: ARG1 | Chaperone DnaJ-domain superfamily protein | chr1:25632046-25634527 REVERSE LENGTH=410	AQGDESKGDGDsAGEEGGTENR	S12 Phospho	0.5	0	165.4	0.9987	56.86	29.75	2	2244.85	749.29	3	0.00707	3.15	369	390
AT1G68370.1	| Symbols: ARG1 | Chaperone DnaJ-domain superfamily protein | chr1:25632046-25634527 REVERSE LENGTH=410	AQGDEsKGDGDSAGEEGGTENR	S6 Phospho	0.5	0	150.16	0.9885	28.21	29.6	2	2244.84	749.288	3	0.00188	0.838	369	390
AT3G25070.1	| Symbols: RIN4 | RPM1 interacting protein 4 | chr3:9132458-9133747 FORWARD LENGTH=211	ADEsPEKVTVVPK	S4 Phospho	1	66.86	163.55	0.9964	19.99	30.87	2	1477.71	739.864	2	0.00667	4.51	138	150
AT3G25070.1	| Symbols: RIN4 | RPM1 interacting protein 4 | chr3:9132458-9133747 FORWARD LENGTH=211	ASQNNSYDNKsPLHK	S11 Phospho	1	21.44	58.44	0.9813	12.57	31.38	2	1781.78	891.897	2	0.00701	3.93	106	120
AT3G25070.1	| Symbols: RIN4 | RPM1 interacting protein 4 | chr3:9132458-9133747 FORWARD LENGTH=211	QFGDAGGsSNEAANK	S8 Phospho	1	23.98	313.84	0.9989	118.1	28.82	2	1531.6	766.806	2	0.00387	2.52	87	101
AT3G25070.1	| Symbols: RIN4 | RPM1 interacting protein 4 | chr3:9132458-9133747 FORWARD LENGTH=211	QFGDAGGSsNEAANK	S9 Phospho	0.5	0	154.5	0.9986	33.45	29.05	2	1531.6	766.808	2	0.00635	4.14	87	101
AT3G25070.1	| Symbols: RIN4 | RPM1 interacting protein 4 | chr3:9132458-9133747 FORWARD LENGTH=211	SPLHKNsYDGTGK	S7 Phospho	0.98	20.98	52.03	0.9543	8.18	30.44	2	1482.66	495.226	3	0.00524	3.53	116	128
AT3G25070.1	| Symbols: RIN4 | RPM1 interacting protein 4 | chr3:9132458-9133747 FORWARD LENGTH=211	QFGDAGGSsNEAANKR	S9 Phospho	0.5	0	81.06	0.9885	30.94	30.23	2	1687.7	844.856	2	0.00167	0.988	87	102
AT3G25070.1	| Symbols: RIN4 | RPM1 interacting protein 4 | chr3:9132458-9133747 FORWARD LENGTH=211	SSGANVSGSSRtPTHQSSR	T12 Phospho	0.23	0	129.18	0.9721	20.75	31.99	2	1981.86	661.627	3	0.000442	0.223	177	195
AT5G05170.1	| Symbols: CESA3, IXR1, ATCESA3, ATH-B, CEV1 | Cellulose synthase family protein | chr5:1530401-1535090 REVERSE LENGTH=1065	NTGPVSTQAAsER	S11 Phospho	1	41.47	185.6	1	64.07	29.55	2	1396.6	699.308	2	0.00279	1.99	206	218
AT5G05170.1	| Symbols: CESA3, IXR1, ATCESA3, ATH-B, CEV1 | Cellulose synthase family protein | chr5:1530401-1535090 REVERSE LENGTH=1065	LPYSSDVNQsPNRR	S10 Phospho	1	36.38	66.65	0.9734	12.32	31.26	2	1711.77	856.895	2	0.00703	4.1	167	180
AT5G05170.1	| Symbols: CESA3, IXR1, ATCESA3, ATH-B, CEV1 | Cellulose synthase family protein | chr5:1530401-1535090 REVERSE LENGTH=1065	LPYSSDVNQsPNR	S10 Phospho	1	60.22	175.67	0.9991	30.78	30.47	2	1555.67	778.843	2	0.00485	3.11	167	179
AT5G05170.1	| Symbols: CESA3, IXR1, ATCESA3, ATH-B, CEV1 | Cellulose synthase family protein | chr5:1530401-1535090 REVERSE LENGTH=1065	QDTsGEFSAASPER	S4 Phospho	0.5	0	144.52	0.9951	26.72	28.78	2	1560.61	781.314	2	0.00383	2.45	141	154
AT5G05170.1	| Symbols: CESA3, IXR1, ATCESA3, ATH-B, CEV1 | Cellulose synthase family protein | chr5:1530401-1535090 REVERSE LENGTH=1065	QDTSGEFSAAsPER	S11 Phospho	1	67.98	310.41	0.9997	110.4	28.83	2	1560.62	781.315	2	0.00629	4.03	141	154
AT4G16340.1	| Symbols: SPK1 | guanyl-nucleotide exchange factors;GTPase binding;GTP binding | chr4:9228773-9241060 REVERSE LENGTH=1830	GPVSEGAGsPK	S9 Phospho	1	152.04	223.2	1	49.97	27.99	2	1064.46	533.236	2	0.00415	3.89	1043	1053
AT4G16340.1	| Symbols: SPK1 | guanyl-nucleotide exchange factors;GTPase binding;GTP binding | chr4:9228773-9241060 REVERSE LENGTH=1830	VNSQLAsPSQPYSLR	S7 Phospho	1	24.95	222.53	0.9833	37.49	31.5	2	1725.79	863.904	2	-0.0147	-8.5	1089	1103
AT4G16340.1	| Symbols: SPK1 | guanyl-nucleotide exchange factors;GTPase binding;GTP binding | chr4:9228773-9241060 REVERSE LENGTH=1830	VNsQLASPSQPYSLR	S3 Phospho	1	84.46	118.76	0.9985	24.28	31.45	2	1725.81	863.913	2	0.00231	1.34	1089	1103
AT5G62810.1	| Symbols: PEX14, ATPEX14, PED2 | peroxin 14 | chr5:25220323-25223571 FORWARD LENGTH=507	SAsPPAAPADSSAPPHPK	S3 Phospho	0.5	0	164.96	0.9973	40.3	31.57	2	1763.79	882.903	2	0.00341	1.93	310	327
AT5G62810.1	| Symbols: PEX14, ATPEX14, PED2 | peroxin 14 | chr5:25220323-25223571 FORWARD LENGTH=507	FSESGGDGsGGIK	S9 Phospho	1	39.42	76.71	0.9541	10.34	32.32	2	1276.5	639.259	2	0.00601	4.7	477	489
AT2G15860.1	| Symbols: | unknown protein; FUNCTIONS IN: molecular_function unknown; INVOLVED IN: biological_process unknown; LOCATED IN: cellular_component unknown; EXPRESSED IN: 24 plant structures; EXPRESSED DURING: 13 growth stages; Has 30201 Blast hits to 17322 proteins in 780 species: Archae - 12; Bacteria - 1396; Metazoa - 17338; Fungi - 3422; Plants - 5037; Viruses - 0; Other Eukaryotes - 2996 (source…	TEEADTEQDsDDENAK	S10 Phospho	1	41.47	244.84	1	65.41	27.36	2	1875.66	938.837	2	0.00609	3.24	100	115
AT2G15860.1	| Symbols: | unknown protein; FUNCTIONS IN: molecular_function unknown; INVOLVED IN: biological_process unknown; LOCATED IN: cellular_component unknown; EXPRESSED IN: 24 plant structures; EXPRESSED DURING: 13 growth stages; Has 30201 Blast hits to 17322 proteins in 780 species: Archae - 12; Bacteria - 1396; Metazoa - 17338; Fungi - 3422; Plants - 5037; Viruses - 0; Other Eukaryotes - 2996 (source…	LENSVQQGSsPR	S10 Phospho	0.99	22.52	281.3	0.9987	58.83	29.94	2	1380.61	691.311	2	0.00367	2.65	169	180
AT2G15860.1	| Symbols: | unknown protein; FUNCTIONS IN: molecular_function unknown; INVOLVED IN: biological_process unknown; LOCATED IN: cellular_component unknown; EXPRESSED IN: 24 plant structures; EXPRESSED DURING: 13 growth stages; Has 30201 Blast hits to 17322 proteins in 780 species: Archae - 12; Bacteria - 1396; Metazoa - 17338; Fungi - 3422; Plants - 5037; Viruses - 0; Other Eukaryotes - 2996 (source…	LEGAsEESLLSQGLK	S5 Phospho	1	46.67	132.7	0.9994	28.47	31.82	2	1639.78	820.896	2	0.00713	4.34	124	138
AT1G67580.2	| Symbols: | Protein kinase superfamily protein | chr1:25327727-25330965 REVERSE LENGTH=752	NTSQtPEVGELVR	T5 Phospho	1	27.96	93.38	0.9562	11.66	34.92	2	1508.69	755.353	2	0.00433	2.87	307	319
AT1G67580.2	| Symbols: | Protein kinase superfamily protein | chr1:25327727-25330965 REVERSE LENGTH=752	HEtPEPASTPLR	T3 Phospho	1	100.67	129.19	0.9995	24.56	30.45	2	1413.64	707.825	2	0.00613	4.33	381	392
AT1G67580.2	| Symbols: | Protein kinase superfamily protein | chr1:25327727-25330965 REVERSE LENGTH=752	sPDPLEEQR	S1 Phospho	1	1000	204.93	1	41.03	28.86	2	1149.47	575.743	2	0.00143	1.24	728	736
AT1G67580.2	| Symbols: | Protein kinase superfamily protein | chr1:25327727-25330965 REVERSE LENGTH=752	NTsQTPEVGELVR	S3 Phospho	1	23.98	174.67	0.9892	36.94	30.9	2	1508.7	755.357	2	0.0129	8.54	307	319
AT3G08710.2	| Symbols: ATH9, TRX H9, TH9 | thioredoxin H-type 9 | chr3:2645590-2646304 FORWARD LENGTH=140	VTSIIDSVPEsPQRP	S11 Phospho	1	99.5	295.27	1	66.49	31.35	2	1703.82	852.916	2	0.00481	2.82	126	140
AT3G08710.2	| Symbols: ATH9, TRX H9, TH9 | thioredoxin H-type 9 | chr3:2645590-2646304 FORWARD LENGTH=140	KVTSIIDSVPEsPQRP	S12 Phospho	1	70.16	200.89	0.9979	22.55	31.03	2	1831.91	916.963	2	0.00315	1.72	125	140
AT5G61780.1	| Symbols: Tudor2, AtTudor2, TSN2 | TUDOR-SN protein 2 | chr5:24822012-24826641 FORWARD LENGTH=985	TGIWEYGDIQsDDEDNVPVR	S11 Phospho	1	252.88	500.16	0.9979	128.9	32.26	2	2387	1194.51	2	0.00385	1.61	961	980
AT4G10760.1	| Symbols: EMB1706, MTA | mRNAadenosine methylase | chr4:6619947-6623312 REVERSE LENGTH=685	ASYPEIDVQPPsPPR	S12 Phospho	1	80.05	83.43	0.9923	13.99	31.41	2	1731.8	866.905	2	0.00911	5.26	653	667
AT1G04780.1	| Symbols: | Ankyrin repeat family protein | chr1:1340891-1342965 REVERSE LENGTH=664	LDsPEESSNGESSR	S3 Phospho	1	117.47	165	1	34.74	28.54	2	1572.6	787.307	2	0.00457	2.9	354	367
AT1G04780.1	| Symbols: | Ankyrin repeat family protein | chr1:1340891-1342965 REVERSE LENGTH=664	VSDLLGDDDsPSR	S10 Phospho	0.99	21.95	289.67	0.9993	69.18	29.54	2	1454.6	728.306	2	0.00481	3.3	426	438
AT1G04780.1	| Symbols: | Ankyrin repeat family protein | chr1:1340891-1342965 REVERSE LENGTH=664	QNScsFEDR	S5 Phospho	1	24.44	75.78	0.9544	13.82	25.44	2	1221.42	611.716	2	0.00578	4.73	372	380
AT1G04780.1	| Symbols: | Ankyrin repeat family protein | chr1:1340891-1342965 REVERSE LENGTH=664	VSDLLGDDDSPsR	S12 Phospho	0	0	127.11	0.9816	17.33	29.69	2	1454.6	728.307	2	0.00747	5.13	426	438
AT1G04780.1	| Symbols: | Ankyrin repeat family protein | chr1:1340891-1342965 REVERSE LENGTH=664	TPsQRPSTSSSSGGFNIGK	S3 Phospho	0.37	14.25	155.66	0.9978	31.84	32.15	2	1973.89	658.972	3	0.00862	4.37	605	623
AT2G17700.1	| Symbols: | ACT-like protein tyrosine kinase family protein | chr2:7685778-7689278 REVERSE LENGTH=546	AVVAsPSQENPR	S5 Phospho	1	50.64	223.49	1	46.31	30.51	2	1333.61	667.812	2	0.00709	5.31	14	25
AT5G47210.1	| Symbols: | Hyaluronan / mRNA binding family | chr5:19169222-19171012 REVERSE LENGTH=357	GNWGTTEDDIPPTSEEPTTEVEKsPVAEK	S24 Phospho	0.32	0	87.34	0.9239	14.84	33.44	2	3222.43	1075.15	3	0.0184	5.7	171	199
AT5G47210.1	| Symbols: | Hyaluronan / mRNA binding family | chr5:19169222-19171012 REVERSE LENGTH=357	EAAAPAIGDTAQFPsLG	S15 Phospho	1	81.16	104.26	0.9993	20.16	31.38	2	1694.76	848.388	2	0.00679	4	341	357
AT5G47210.1	| Symbols: | Hyaluronan / mRNA binding family | chr5:19169222-19171012 REVERSE LENGTH=357	SLsINEFLKPADGK	S3 Phospho	1	24.44	194.31	0.9986	47.82	30.98	2	1597.78	799.899	2	0.00719	4.5	299	312
AT3G22850.1	| Symbols: | Aluminium induced protein with YGL and LRDR motifs | chr3:8089067-8090275 FORWARD LENGTH=248	VDsSGEVcGVTFK	S3 Phospho	1	52.4	234.97	0.999	105.6	29.85	2	1463.6	732.809	2	0.00334	2.28	213	225
AT3G22850.1	| Symbols: | Aluminium induced protein with YGL and LRDR motifs | chr3:8089067-8090275 FORWARD LENGTH=248	VGsVQNWSK	S3 Phospho	1	162.6	196.5	1	75.79	29.62	2	1083.48	542.748	2	0.00587	5.41	238	246
AT3G22850.1	| Symbols: | Aluminium induced protein with YGL and LRDR motifs | chr3:8089067-8090275 FORWARD LENGTH=248	VDSsGEVcGVTFK	S4 Phospho	0.5	0	134.35	0.9966	32.64	29.8	2	1463.6	732.808	2	0.00192	1.31	213	225
AT3G09670.1	| Symbols: | Tudor/PWWP/MBT superfamily protein | chr3:2966637-2968817 FORWARD LENGTH=726	EIsPSTTLSSPHAASVTK	S3 Phospho	1	81.61	241.62	1	71.42	31.77	2	1891.9	946.957	2	0.00687	3.63	604	621
AT3G09670.1	| Symbols: | Tudor/PWWP/MBT superfamily protein | chr3:2966637-2968817 FORWARD LENGTH=726	ANLQTEDPGSPVsPK	S13 Phospho	1	70.88	261.55	0.9995	33.36	31.58	2	1618.73	810.372	2	0.00587	3.62	513	527
AT3G09670.1	| Symbols: | Tudor/PWWP/MBT superfamily protein | chr3:2966637-2968817 FORWARD LENGTH=726	ANLQTEDPGsPVSPK	S10 Phospho	1	56.2	234.84	0.9988	35.07	31.47	2	1618.73	810.372	2	0.00441	2.72	513	527
AT2G35880.1	| Symbols: | TPX2 (targeting protein for Xklp2) protein family | chr2:15063204-15065259 REVERSE LENGTH=432	SSsDATGGEAAPR	S3 Phospho	0.97	17.98	142.08	0.9988	44.73	27.75	2	1284.5	643.259	2	0.00549	4.27	335	347
AT2G35880.1	| Symbols: | TPX2 (targeting protein for Xklp2) protein family | chr2:15063204-15065259 REVERSE LENGTH=432	SsVGSASGFSFR	S2 Phospho	0.5	0	219.25	0.9987	77.82	28.4	2	1267.53	634.772	2	0.00575	4.53	238	249
AT2G35880.1	| Symbols: | TPX2 (targeting protein for Xklp2) protein family | chr2:15063204-15065259 REVERSE LENGTH=432	SsSDATGGEAAPR	S2 Phospho	0.33	0	233.78	0.9988	64.16	27.72	2	1284.5	643.258	2	0.00403	3.13	335	347
AT2G35880.1	| Symbols: | TPX2 (targeting protein for Xklp2) protein family | chr2:15063204-15065259 REVERSE LENGTH=432	RKSSsDATGGEAAPR	S5 Phospho	0.32	0	104.42	0.9913	30.65	30.57	2	1568.7	523.906	3	0.00194	1.24	333	347
AT2G35880.1	| Symbols: | TPX2 (targeting protein for Xklp2) protein family | chr2:15063204-15065259 REVERSE LENGTH=432	sIKEETAGKDVEEAGSTTAVVADK	S1 Phospho	1	33.67	137.71	0.994	19.93	32.32	2	2514.18	839.068	3	0.00903	3.59	183	206
AT2G35880.1	| Symbols: | TPX2 (targeting protein for Xklp2) protein family | chr2:15063204-15065259 REVERSE LENGTH=432	DVEEAGStTAVVADK	T8 Phospho	0.33	0	154.74	0.992	31.42	34.64	2	1570.68	786.348	2	0.00463	2.94	192	206
AT2G35880.1	| Symbols: | TPX2 (targeting protein for Xklp2) protein family | chr2:15063204-15065259 REVERSE LENGTH=432	LGDEGSKsIKEETAGK	S8 Phospho	1	39.54	180.58	0.9989	40.59	31.39	2	1727.81	576.942	3	0.00693	4.01	176	191
AT2G35880.1	| Symbols: | TPX2 (targeting protein for Xklp2) protein family | chr2:15063204-15065259 REVERSE LENGTH=432	DVEEAGsTTAVVADK	S7 Phospho	0.99	24.95	249.55	0.9961	64.6	30.68	2	1570.68	786.346	2	0.000108	0.0688	192	206
AT5G20490.2	| Symbols: XIK, ATXIK, XI-17 | Myosin family protein with Dil domain | chr5:6927064-6936079 REVERSE LENGTH=1465	ENsGFGFLLTR	S3 Phospho	1	174.86	220.73	1	73.03	30.73	2	1319.59	660.803	2	-0.000412	-0.312	0	0
AT5G20490.2	| Symbols: XIK, ATXIK, XI-17 | Myosin family protein with Dil domain | chr5:6927064-6936079 REVERSE LENGTH=1465	GSPQSAGLsFLNR	S9 Phospho	1	38.87	62.22	0.9994	31.15	30.64	2	1412.65	707.332	2	0.00345	2.44	0	0
AT5G20490.2	| Symbols: XIK, ATXIK, XI-17 | Myosin family protein with Dil domain | chr5:6927064-6936079 REVERSE LENGTH=1465	QQALAIsPTSR	S7 Phospho	0.99	23.2	108.92	0.9987	28.44	30.26	2	1250.61	626.31	2	0.00373	2.98	0	0
AT3G01310.2	| Symbols: | Phosphoglycerate mutase-like family protein | chr3:94343-101603 REVERSE LENGTH=1050	QGsGIIGTFGQSEELR	S3 Phospho	1	175.33	285.57	1	75.5	31.54	2	1757.8	879.909	2	0.00437	2.48	350	365
AT3G01310.2	| Symbols: | Phosphoglycerate mutase-like family protein | chr3:94343-101603 REVERSE LENGTH=1050	EsDSDAEDLEHAEK	S2 Phospho	0.01	0	205.16	0.9961	70.14	27.91	2	1653.61	827.81	2	0.00153	0.924	434	447
AT3G01310.2	| Symbols: | Phosphoglycerate mutase-like family protein | chr3:94343-101603 REVERSE LENGTH=1050	ESQEQVLSLSAsQR	S12 Phospho	0.98	18.95	155.64	0.9988	34.94	31.17	2	1640.75	821.381	2	0.00583	3.55	810	823
AT3G48890.1	| Symbols: ATMP2, ATMAPR3, MSBP2, MAPR3 | membrane-associated progesterone binding protein 3 | chr3:18129669-18131353 FORWARD LENGTH=233	KDVAtDDDDAAKE	T5 Phospho	1	1000	356.79	1	85.86	28.86	2	1471.58	736.795	2	0.00427	2.9	221	233
AT3G48890.1	| Symbols: ATMP2, ATMAPR3, MSBP2, MAPR3 | membrane-associated progesterone binding protein 3 | chr3:18129669-18131353 FORWARD LENGTH=233	DVAtDDDDAAKE	T4 Phospho	1	1000	236.84	1	57.75	26.72	2	1343.48	672.748	2	0.00363	2.7	222	233
AT1G64790.1	| Symbols: ILA | ILITYHIA | chr1:24065232-24081908 REVERSE LENGTH=2610	ALLEGGsDDEGASTEAQGR	S7 Phospho	1	166.75	411.83	0.9989	138.3	31.32	2	1941.8	971.909	2	0.00781	4.02	1795	1813
AT3G25840.1	| Symbols: | Protein kinase superfamily protein | chr3:9452993-9457446 REVERSE LENGTH=935	NEVTPYLVsR	S9 Phospho	0.02	0	135.31	0.9734	15.15	30.05	2	1256.58	629.3	2	0.00457	3.63	777	786
AT3G25840.1	| Symbols: | Protein kinase superfamily protein | chr3:9452993-9457446 REVERSE LENGTH=935	NEVTPyLVSR	Y6 Phospho	1	63.6	200.04	0.9997	48.48	30.06	2	1256.59	629.3	2	0.00517	4.11	777	786
AT3G25840.1	| Symbols: | Protein kinase superfamily protein | chr3:9452993-9457446 REVERSE LENGTH=935	TADsDGESGEIK	S4 Phospho	1	70.16	191.09	1	45.9	27.6	2	1287.49	644.753	2	0.00371	2.88	102	113
AT3G25840.1	| Symbols: | Protein kinase superfamily protein | chr3:9452993-9457446 REVERSE LENGTH=935	NQAQAGLGEGsPK	S11 Phospho	1	1000	186.01	1	41.1	29.94	2	1335.59	668.801	2	0.00539	4.03	545	557
AT5G64813.1	| Symbols: LIP1 | Ras-related small GTP-binding family protein | chr5:25910836-25912625 FORWARD LENGTH=342	EGTKGsSGNLVDAAR	S6 Phospho	1	27.96	215.33	0.9821	35.8	30.53	2	1540.66	771.34	2	-0.0239	-15.5	168	182
AT5G64813.1	| Symbols: LIP1 | Ras-related small GTP-binding family protein | chr5:25910836-25912625 FORWARD LENGTH=342	GsSGNLVDAAR	S2 Phospho	1	27.96	162.44	0.9996	57.59	28.56	2	1125.48	563.749	2	0.00249	2.21	172	182
AT5G64813.1	| Symbols: LIP1 | Ras-related small GTP-binding family protein | chr5:25910836-25912625 FORWARD LENGTH=342	LDEITsDDDQFYK	S6 Phospho	0.5	0	112.32	0.9614	13.65	29.78	2	1667.67	834.841	2	0.00735	4.4	260	272
AT5G64813.1	| Symbols: LIP1 | Ras-related small GTP-binding family protein | chr5:25910836-25912625 FORWARD LENGTH=342	GSsGNLVDAAR	S3 Phospho	0.5	0	128.78	0.9967	30.54	28.98	2	1125.49	563.75	2	0.00403	3.58	172	182
AT5G64813.1	| Symbols: LIP1 | Ras-related small GTP-binding family protein | chr5:25910836-25912625 FORWARD LENGTH=342	HITYGsPASSSSSIQGDSER	S6 Phospho	0.99	20.2	168.11	0.9984	50	32.04	2	2144.91	715.977	3	0.00845	3.94	63	82
AT2G26730.1	| Symbols: | Leucine-rich repeat protein kinase family protein | chr2:11388621-11391286 FORWARD LENGTH=658	GSEGQtPPGESR	T6 Phospho	1	77.52	130.13	0.9976	28.5	28.69	2	1280.51	641.263	2	0.00703	5.48	639	650
AT2G26730.1	| Symbols: | Leucine-rich repeat protein kinase family protein | chr2:11388621-11391286 FORWARD LENGTH=658	SETTDDGLRQsSDDPSK	S11 Phospho	0.89	15.01	122.55	0.9972	28.59	30.49	2	1916.77	959.392	2	0.00525	2.74	622	638
AT2G26730.1	| Symbols: | Leucine-rich repeat protein kinase family protein | chr2:11388621-11391286 FORWARD LENGTH=658	SETTDDGLRQSsDDPSK	S12 Phospho	0.2	0	77.99	0.9375	12.28	30.61	2	1916.77	959.394	2	0.00905	4.72	622	638
AT2G34680.1	| Symbols: AIR9 | Outer arm dynein light chain 1 protein | chr2:14616947-14628300 REVERSE LENGTH=1708	sPESVSAVSVVSNR	S1 Phospho	1	88.93	274.76	0.9993	78.42	30.73	2	1496.7	749.355	2	0.00901	6.01	33	46
AT2G34680.1	| Symbols: AIR9 | Outer arm dynein light chain 1 protein | chr2:14616947-14628300 REVERSE LENGTH=1708	VSsPSAGSSPSVSSSIR	S3 Phospho	0.5	0	189.46	0.9985	49.96	31.34	2	1670.76	836.387	2	0.00765	4.57	211	227
AT2G34680.1	| Symbols: AIR9 | Outer arm dynein light chain 1 protein | chr2:14616947-14628300 REVERSE LENGTH=1708	RNsTGGVTENLAGTSK	S3 Phospho	1	55.92	295.54	0.9991	53.15	31.48	2	1670.77	836.392	2	0.00591	3.53	81	96
AT2G34680.1	| Symbols: AIR9 | Outer arm dynein light chain 1 protein | chr2:14616947-14628300 REVERSE LENGTH=1708	SKsFSSPLDR	S3 Phospho	1	54.16	157.78	0.9982	33.04	29.64	2	1202.54	602.275	2	0.00301	2.5	228	237
AT2G34680.1	| Symbols: AIR9 | Outer arm dynein light chain 1 protein | chr2:14616947-14628300 REVERSE LENGTH=1708	SVPVsPGSR	S5 Phospho	1	38.17	91.38	0.9985	22.55	27.79	2	964.441	483.228	2	0.00281	2.91	143	151
AT2G34680.1	| Symbols: AIR9 | Outer arm dynein light chain 1 protein | chr2:14616947-14628300 REVERSE LENGTH=1708	KSVPVsPGSR	S6 Phospho	1	26.2	97.44	0.9608	12.35	33.1	2	1092.54	547.276	2	0.00357	3.26	142	151
AT5G64220.2	| Symbols: | Calmodulin-binding transcription activator protein with CG-1 and Ankyrin domains | chr5:25686434-25691903 FORWARD LENGTH=1050	ENEASSSsALK	S8 Phospho	0.25	0	72.45	0.9785	15.77	28.06	2	1201.49	601.753	2	0.00457	3.8	1007	1017
AT5G64220.2	| Symbols: | Calmodulin-binding transcription activator protein with CG-1 and Ankyrin domains | chr5:25686434-25691903 FORWARD LENGTH=1050	ENEASSsSALK	S7 Phospho	0.01	0	122.43	0.9964	23.87	28.03	2	1201.49	601.753	2	0.00531	4.41	1007	1017
AT5G64220.2	| Symbols: | Calmodulin-binding transcription activator protein with CG-1 and Ankyrin domains | chr5:25686434-25691903 FORWARD LENGTH=1050	SSILsPLcEDADSGDSR	S5 Phospho	0.97	18.44	94.15	0.9948	27.16	31.19	2	1887.76	944.887	2	0.00396	2.1	168	184
AT3G10540.1	| Symbols: | 3-phosphoinositide-dependent protein kinase | chr3:3289916-3292429 FORWARD LENGTH=486	LASIDsFDSR	S6 Phospho	1	38.17	172.06	0.9974	27.03	29.78	2	1189.51	595.762	2	0.00707	5.94	375	384
AT3G10540.1	| Symbols: | 3-phosphoinositide-dependent protein kinase | chr3:3289916-3292429 FORWARD LENGTH=486	LAPDPASQSAsPER	S11 Phospho	1	44.63	167.67	0.9964	30.85	30.88	2	1504.66	753.338	2	0.00571	3.79	328	341
AT3G10540.1	| Symbols: | 3-phosphoinositide-dependent protein kinase | chr3:3289916-3292429 FORWARD LENGTH=486	LAsIDSFDSR	S3 Phospho	1	105.08	187.91	1	51.31	29.61	2	1189.51	595.761	2	0.00475	3.99	375	384
AT1G54270.1	| Symbols: EIF4A-2 | eif4a-2 | chr1:20260495-20262018 FORWARD LENGTH=412	AGsAPEGTQFDTR	S3 Phospho	1	93.64	125.45	1	31.65	29.29	1	1415.58	708.799	2	0.0105	7.4	2	14
AT3G17900.1	| Symbols: | unknown protein; FUNCTIONS IN: molecular_function unknown; INVOLVED IN: biological_process unknown; LOCATED IN: cellular_component unknown; EXPRESSED IN: 23 plant structures; EXPRESSED DURING: 13 growth stages; Has 45 Blast hits to 44 proteins in 14 species: Archae - 0; Bacteria - 0; Metazoa - 2; Fungi - 2; Plants - 39; Viruses - 0; Other Eukaryotes - 2 (source: NCBI BLink). | chr3:6…	KQQsLPPIPLETR	S4 Phospho	1	145.88	105.76	0.9988	16.24	29.16	2	1585.83	529.616	3	0.00426	2.69	734	746
AT3G17900.1	| Symbols: | unknown protein; FUNCTIONS IN: molecular_function unknown; INVOLVED IN: biological_process unknown; LOCATED IN: cellular_component unknown; EXPRESSED IN: 23 plant structures; EXPRESSED DURING: 13 growth stages; Has 45 Blast hits to 44 proteins in 14 species: Archae - 0; Bacteria - 0; Metazoa - 2; Fungi - 2; Plants - 39; Viruses - 0; Other Eukaryotes - 2 (source: NCBI BLink). | chr3:6…	DLsDGESILR	S3 Phospho	1	98.4	117.04	0.9991	22.49	29.15	2	1183.52	592.767	2	0.00667	5.63	207	216
AT3G17900.1	| Symbols: | unknown protein; FUNCTIONS IN: molecular_function unknown; INVOLVED IN: biological_process unknown; LOCATED IN: cellular_component unknown; EXPRESSED IN: 23 plant structures; EXPRESSED DURING: 13 growth stages; Has 45 Blast hits to 44 proteins in 14 species: Archae - 0; Bacteria - 0; Metazoa - 2; Fungi - 2; Plants - 39; Viruses - 0; Other Eukaryotes - 2 (source: NCBI BLink). | chr3:6…	SSsLSLPTVNFER	S3 Phospho	0.99	23.98	137.21	0.9923	24.14	30.8	2	1515.7	758.857	2	0.00267	1.76	591	603
AT3G17900.1	| Symbols: | unknown protein; FUNCTIONS IN: molecular_function unknown; INVOLVED IN: biological_process unknown; LOCATED IN: cellular_component unknown; EXPRESSED IN: 23 plant structures; EXPRESSED DURING: 13 growth stages; Has 45 Blast hits to 44 proteins in 14 species: Archae - 0; Bacteria - 0; Metazoa - 2; Fungi - 2; Plants - 39; Viruses - 0; Other Eukaryotes - 2 (source: NCBI BLink). | chr3:6…	QQsLPPIPLETR	S3 Phospho	1	118.47	108.16	0.9995	24.67	30.01	2	1457.73	729.874	2	0.00519	3.56	735	746
AT1G01100.4	| Symbols: | 60S acidic ribosomal protein family | chr1:50284-50954 REVERSE LENGTH=112	KDEPAEEsDGDLGFGLFD	S8 Phospho	1	1000	148.88	1	52.49	30.39	2	2019.8	1010.91	2	0.000948	0.469	95	112
AT1G01100.4	| Symbols: | 60S acidic ribosomal protein family | chr1:50284-50954 REVERSE LENGTH=112	KKDEPAEEsDGDLGFGLFD	S9 Phospho	1	1000	104.55	0.9921	13.67	32.07	2	2147.91	716.976	3	0.0128	5.97	94	112
AT3G14100.1	| Symbols: | RNA-binding (RRM/RBD/RNP motifs) family protein | chr3:4673027-4675950 FORWARD LENGTH=427	GATSGDDKLsSDGK	S10 Phospho	0.99	23.98	319.52	0.9995	93.27	29.06	2	1416.58	709.299	2	0.00569	4.01	223	236
AT3G14100.1	| Symbols: | RNA-binding (RRM/RBD/RNP motifs) family protein | chr3:4673027-4675950 FORWARD LENGTH=427	SVVELTTGSsEDGK	S10 Phospho	0.5	0	235.96	0.9986	36.87	30.5	2	1487.64	744.829	2	0.00433	2.91	237	250
AT3G14100.1	| Symbols: | RNA-binding (RRM/RBD/RNP motifs) family protein | chr3:4673027-4675950 FORWARD LENGTH=427	GATSGDDKLSsDGK	S11 Phospho	0.25	0	48.21	0.9962	29.56	28.81	2	1416.58	473.201	3	0.00438	3.09	223	236
AT5G04510.2	| Symbols: PDK1, ATPDK1 | 3'-phosphoinositide-dependent protein kinase 1 | chr5:1287235-1289231 FORWARD LENGTH=408	LAPDPASQTAsPER	S11 Phospho	0.99	21.95	129.57	0.9974	22.6	30.91	2	1518.67	760.345	2	0.00287	1.89	327	340
AT1G28330.2	| Symbols: DYL1 | dormancy-associated protein-like 1 | chr1:9934500-9935216 REVERSE LENGTH=132	ITtQPINIR	T3 Phospho	1	24.95	165.67	1	59.64	29.52	2	1134.58	568.299	2	0.00351	3.09	27	35
AT1G28330.2	| Symbols: DYL1 | dormancy-associated protein-like 1 | chr1:9934500-9935216 REVERSE LENGTH=132	KITtQPINIR	T4 Phospho	1	23.98	184.1	0.9982	30.21	28.93	2	1262.68	632.347	2	0.00393	3.11	26	35
AT1G15280.1	| Symbols: | CASC3/Barentsz eIF4AIII binding | chr1:5252538-5256214 FORWARD LENGTH=584	EASDDDsDDDDAVR	S7 Phospho	0.5	0	65.76	0.9989	17.04	28.96	2	1603.52	802.768	2	0.00501	3.12	25	38
AT1G15280.1	| Symbols: | CASC3/Barentsz eIF4AIII binding | chr1:5252538-5256214 FORWARD LENGTH=584	AVVDsDLSDEEVGTVK	S5 Phospho	1	79.9	188.77	1	48.92	31.11	2	1741.77	871.892	2	0.00325	1.86	45	60
AT1G15280.1	| Symbols: | CASC3/Barentsz eIF4AIII binding | chr1:5252538-5256214 FORWARD LENGTH=584	AVVDSDLsDEEVGTVK	S8 Phospho	1	42.24	157.86	0.9984	30.72	31.16	2	1741.77	871.891	2	0.00129	0.739	45	60
AT1G15280.1	| Symbols: | CASC3/Barentsz eIF4AIII binding | chr1:5252538-5256214 FORWARD LENGTH=584	LHTNESVtPSGK	T8 Phospho	0.33	0	84.62	0.9213	10.55	30.24	2	1348.61	675.312	2	0.00633	4.69	306	317
AT5G04280.1	| Symbols: | RNA-binding (RRM/RBD/RNP motifs) family protein with retrovirus zinc finger-like domain | chr5:1192461-1195413 FORWARD LENGTH=310	sGGGGAYPSSSTFDRY	S1 Phospho	1	81.07	134.4	0.9995	27.06	29.2	2	1687.66	844.835	2	0.00399	2.36	295	310
AT5G04280.1	| Symbols: | RNA-binding (RRM/RBD/RNP motifs) family protein with retrovirus zinc finger-like domain | chr5:1192461-1195413 FORWARD LENGTH=310	sGGGGAYPSSSTFDR	S1 Phospho	1	138.94	163.19	1	32.37	28.67	2	1524.59	763.302	2	0.00157	1.03	295	309
AT5G04280.1	| Symbols: | RNA-binding (RRM/RBD/RNP motifs) family protein with retrovirus zinc finger-like domain | chr5:1192461-1195413 FORWARD LENGTH=310	IFVGGLsPEVTDR	S7 Phospho	1	53.49	111.31	0.9995	28.9	30.76	2	1468.7	735.359	2	0.00603	4.1	9	21
AT5G41970.1	| Symbols: | Metal-dependent protein hydrolase | chr5:16791198-16792961 FORWARD LENGTH=373	VYSTATsPSPSEISVK	S7 Phospho	1	27.96	310.11	0.9988	79.83	31.43	2	1731.8	866.909	2	0.00705	4.07	36	51
AT5G41970.1	| Symbols: | Metal-dependent protein hydrolase | chr5:16791198-16792961 FORWARD LENGTH=373	VYSTATSPsPSEISVK	S9 Phospho	1	27.96	207.45	0.9989	58.84	31.49	2	1731.8	866.91	2	0.00783	4.52	36	51
AT2G21230.1	| Symbols: | Basic-leucine zipper (bZIP) transcription factor family protein | chr2:9093920-9096059 REVERSE LENGTH=519	SIsGEDTSDWSNLVK	S3 Phospho	1	29.21	265.03	0.9986	84.53	30.67	2	1716.73	859.372	2	0.00451	2.62	174	188
AT2G21230.1	| Symbols: | Basic-leucine zipper (bZIP) transcription factor family protein | chr2:9093920-9096059 REVERSE LENGTH=519	VNsSSGTSSSSIPK	S3 Phospho	1	58.42	206.26	0.999	35.71	29.9	2	1416.62	709.316	2	0.00505	3.56	16	29
AT2G21230.1	| Symbols: | Basic-leucine zipper (bZIP) transcription factor family protein | chr2:9093920-9096059 REVERSE LENGTH=519	VALSSSSsGVK	S8 Phospho	0.97	20.98	186.96	0.9974	40.02	29.38	2	1100.52	551.266	2	0.00667	6.05	272	282
AT3G56150.2	| Symbols: EIF3C | eukaryotic translation initiation factor 3C | chr3:20833790-20836820 REVERSE LENGTH=900	YLQSGsEDDDDTDTKR	S6 Phospho	0.33	0	119.23	0.9952	31.35	29.7	2	1923.74	642.255	3	0.0045	2.34	35	50
AT3G56150.2	| Symbols: EIF3C | eukaryotic translation initiation factor 3C | chr3:20833790-20836820 REVERSE LENGTH=900	YLQsGSEDDDDTDTKR	S4 Phospho	0.98	20.19	184.86	0.9981	56.64	29.71	2	1923.74	962.878	2	0.00397	2.06	35	50
AT3G56150.2	| Symbols: EIF3C | eukaryotic translation initiation factor 3C | chr3:20833790-20836820 REVERSE LENGTH=900	YLQSGsEDDDDTDTK	S6 Phospho	1	48.15	274.8	1	83.42	27.87	2	1767.64	884.827	2	0.00317	1.79	35	49
AT1G61730.1	| Symbols: | DNA-binding storekeeper protein-related transcriptional regulator | chr1:22793447-22794577 REVERSE LENGTH=376	IKsPSATTAAAPPAK	S3 Phospho	1	54.16	113.56	0.9922	15.84	29.81	2	1489.76	745.888	2	0.00739	4.96	47	61
AT1G61730.1	| Symbols: | DNA-binding storekeeper protein-related transcriptional regulator | chr1:22793447-22794577 REVERSE LENGTH=376	SPsATTAAAPPAK	S3 Phospho	0.01	1.24	147.22	0.9985	36.89	30.12	2	1248.58	625.298	2	0.00629	5.03	49	61
AT1G61730.1	| Symbols: | DNA-binding storekeeper protein-related transcriptional regulator | chr1:22793447-22794577 REVERSE LENGTH=376	sPSATTAAAPPAK	S1 Phospho	1	48.15	182.41	0.9989	45.98	30.2	2	1248.58	625.297	2	0.00519	4.15	49	61
AT1G61730.1	| Symbols: | DNA-binding storekeeper protein-related transcriptional regulator | chr1:22793447-22794577 REVERSE LENGTH=376	IKSPSAtTAAAPPAK	T7 Phospho	0.25	0	93.39	0.9917	18.51	29.89	2	1489.76	497.593	3	0.0041	2.75	47	61
AT1G20920.1	| Symbols: | P-loop containing nucleoside triphosphate hydrolases superfamily protein | chr1:7285342-7288842 FORWARD LENGTH=1166	IIQGEDsDSDYSEPK	S7 Phospho	1	43.29	186.55	0.9941	26.29	30.78	2	1761.71	881.862	2	0.0114	6.45	436	450
AT1G20920.1	| Symbols: | P-loop containing nucleoside triphosphate hydrolases superfamily protein | chr1:7285342-7288842 FORWARD LENGTH=1166	EVGNEEsDDDVKR	S7 Phospho	1	1000	242.95	1	71.84	29.91	2	1570.62	786.318	2	0.00627	3.99	204	216
AT1G20920.1	| Symbols: | P-loop containing nucleoside triphosphate hydrolases superfamily protein | chr1:7285342-7288842 FORWARD LENGTH=1166	IIQGEDSDsDYSEPK	S9 Phospho	0.49	0	146.09	0.9808	17.69	30.55	2	1761.7	881.858	2	0.00353	2	436	450
AT1G20920.1	| Symbols: | P-loop containing nucleoside triphosphate hydrolases superfamily protein | chr1:7285342-7288842 FORWARD LENGTH=1166	EVGNEEsDDDVK	S7 Phospho	1	1000	97.2	0.9993	20.59	27.51	2	1414.52	708.266	2	0.00301	2.13	204	215
AT2G20190.1	| Symbols: ATCLASP, CLASP | CLIP-associated protein | chr2:8711862-8718813 REVERSE LENGTH=1439	SSsLDLGVDPPSSR	S3 Phospho	1	27.96	259.68	0.998	66.17	30.64	2	1495.66	748.839	2	0.00813	5.43	611	624
AT2G20190.1	| Symbols: ATCLASP, CLASP | CLIP-associated protein | chr2:8711862-8718813 REVERSE LENGTH=1439	DSDYTFASAGQNsISR	S13 Phospho	1	44.63	157.89	0.9974	38.65	30.37	2	1797.72	899.869	2	0.00267	1.48	1125	1140
AT2G20190.1	| Symbols: ATCLASP, CLASP | CLIP-associated protein | chr2:8711862-8718813 REVERSE LENGTH=1439	YSGGSIDsDSGR	S8 Phospho	0.99	23.2	130.53	0.9966	20.27	27.35	2	1279.48	640.747	2	0.00683	5.33	1068	1079
AT2G20190.1	| Symbols: ATCLASP, CLASP | CLIP-associated protein | chr2:8711862-8718813 REVERSE LENGTH=1439	YSGGsIDSDSGR	S5 Phospho	1	39.54	96.19	0.9996	30.44	27.04	2	1279.48	640.746	2	0.00537	4.19	1068	1079
AT2G20190.1	| Symbols: ATCLASP, CLASP | CLIP-associated protein | chr2:8711862-8718813 REVERSE LENGTH=1439	SYDPSDAIGTSsEEGYAGASK	S12 Phospho	0.5	0	290.08	0.9985	51.74	30.9	2	2170.87	1086.44	2	0.0103	4.76	1040	1060
AT2G20190.1	| Symbols: ATCLASP, CLASP | CLIP-associated protein | chr2:8711862-8718813 REVERSE LENGTH=1439	SsSLDLGVDPPSSR	S2 Phospho	0	0	244.16	0.9984	57.61	30.59	2	1495.66	748.839	2	0.00751	5.02	611	624
AT3G57410.1	| Symbols: VLN3, ATVLN3 | villin 3 | chr3:21243615-21249809 REVERSE LENGTH=965	SGLTSQAsQR	S8 Phospho	1	93.05	202.73	1	47.74	28.56	2	1113.49	557.751	2	0.00489	4.39	819	828
AT3G57410.1	| Symbols: VLN3, ATVLN3 | villin 3 | chr3:21243615-21249809 REVERSE LENGTH=965	SPDTsPSAEAK	S5 Phospho	0.49	0	128.78	0.9956	26.64	28.41	2	1168.47	585.243	2	0.00605	5.17	846	856
AT3G57410.1	| Symbols: VLN3, ATVLN3 | villin 3 | chr3:21243615-21249809 REVERSE LENGTH=965	sPDTSPSAEAK	S1 Phospho	1	50.19	87.03	0.9983	16.46	28.24	2	1168.47	585.241	2	0.00227	1.94	846	856
AT3G57410.1	| Symbols: VLN3, ATVLN3 | villin 3 | chr3:21243615-21249809 REVERSE LENGTH=965	AEALAALTSAFNSsPSSK	S14 Phospho	0.25	0	307.47	0.9984	69.12	31.49	2	1830.85	916.432	2	0.00865	4.72	796	813
AT3G57410.1	| Symbols: VLN3, ATVLN3 | villin 3 | chr3:21243615-21249809 REVERSE LENGTH=965	AAALAALTSAFNSSsGR	S15 Phospho	0.33	0	66.23	0.9687	20.89	31.6	2	1673.79	837.902	2	0.0124	7.4	760	776
AT5G47430.1	| Symbols: | DWNN domain, a CCHC-type zinc finger | chr5:19235819-19240596 REVERSE LENGTH=892	sPPVVVSDVSEDK	S1 Phospho	1	140.92	152.4	1	47.55	30.24	2	1436.65	719.332	2	0.00523	3.64	866	878
AT5G47430.1	| Symbols: | DWNN domain, a CCHC-type zinc finger | chr5:19235819-19240596 REVERSE LENGTH=892	ILEAGNDStENVGSVGHIPDLESAR	T9 Phospho	0.48	0	62.01	0.9804	17.34	32.87	2	2659.22	887.415	3	0.00973	3.66	356	380
AT5G47430.1	| Symbols: | DWNN domain, a CCHC-type zinc finger | chr5:19235819-19240596 REVERSE LENGTH=892	KPVLsNNNDASTLK	S5 Phospho	1	102.06	167.86	1	31.91	31.2	2	1579.77	790.891	2	0.00599	3.79	400	413
AT5G47430.1	| Symbols: | DWNN domain, a CCHC-type zinc finger | chr5:19235819-19240596 REVERSE LENGTH=892	sPPVVVSDVSEDKLR	S1 Phospho	1	108.98	143.14	1	35.55	30.92	2	1705.83	853.924	2	0.00441	2.58	866	880
AT5G47430.1	| Symbols: | DWNN domain, a CCHC-type zinc finger | chr5:19235819-19240596 REVERSE LENGTH=892	ALsPTTSVASK	S3 Phospho	1	77.86	182.75	0.9988	33.96	29.65	2	1140.55	571.281	2	0.00413	3.62	386	396
AT2G26570.1	| Symbols: WEB1 | Plant protein of unknown function (DUF827) | chr2:11299565-11302076 FORWARD LENGTH=807	FSGSPVSTGtPK	T10 Phospho	0.98	19.53	180.06	0.999	41.57	29.61	2	1243.55	622.784	2	0.00441	3.54	145	156
AT2G26570.1	| Symbols: WEB1 | Plant protein of unknown function (DUF827) | chr2:11299565-11302076 FORWARD LENGTH=807	NLKEsFEGGK	S5 Phospho	1	1000	94.55	0.9989	16.43	29.41	2	1187.53	594.77	2	0.00355	2.99	740	749
AT2G26570.1	| Symbols: WEB1 | Plant protein of unknown function (DUF827) | chr2:11299565-11302076 FORWARD LENGTH=807	FSGsPVSTGTPK	S4 Phospho	1	67.3	186.66	1	65.7	29.75	2	1243.55	622.784	2	0.00513	4.12	145	156
AT4G17720.1	| Symbols: | RNA-binding (RRM/RBD/RNP motifs) family protein | chr4:9862660-9864498 REVERSE LENGTH=313	LSEsPEAK	S4 Phospho	1	27.96	67.22	0.9686	13.48	27.08	2	939.396	470.705	2	0.000548	0.583	276	283
AT4G17720.1	| Symbols: | RNA-binding (RRM/RBD/RNP motifs) family protein | chr4:9862660-9864498 REVERSE LENGTH=313	VHLSEsPK	S6 Phospho	0.5	0	116.15	0.99	25.32	29.08	2	975.445	488.73	2	0.00271	2.77	255	262
AT4G17720.1	| Symbols: | RNA-binding (RRM/RBD/RNP motifs) family protein | chr4:9862660-9864498 REVERSE LENGTH=313	VHLsESPK	S4 Phospho	0.99	20.19	89.44	0.9448	9.45	29.18	2	975.446	488.73	2	0.00333	3.41	255	262
AT5G25270.1	| Symbols: | Ubiquitin-like superfamily protein | chr5:8757577-8762002 REVERSE LENGTH=658	RPEPPsPPESK	S6 Phospho	1	43.97	107.03	0.9448	12.4	30.2	2	1299.59	650.803	2	0.00607	4.67	627	637
AT5G25270.1	| Symbols: | Ubiquitin-like superfamily protein | chr5:8757577-8762002 REVERSE LENGTH=658	QPQSVGtPGR	T7 Phospho	1	23.2	64.52	0.9361	10.88	29.24	2	1105.49	553.754	2	0.00241	2.18	491	500
AT5G14640.1	| Symbols: ATSK13, SK13 | shaggy-like kinase 13 | chr5:4719350-4721772 REVERSE LENGTH=410	GEPNISyIcSR	Y7 Phospho	1	30.97	156.22	0.9962	28.51	29.15	2	1374.57	688.291	2	0.00444	3.23	228	238
AT5G14640.1	| Symbols: ATSK13, SK13 | shaggy-like kinase 13 | chr5:4719350-4721772 REVERSE LENGTH=410	GEPNISYIcsR	S10 Phospho	0	0	167.58	0.9963	23.8	29.12	2	1374.57	688.292	2	0.00522	3.8	228	238
AT5G01400.1	| Symbols: ESP4 | HEAT repeat-containing protein | chr5:162803-171072 REVERSE LENGTH=1467	TsDPQASSQTLR	S2 Phospho	0.5	0	107.43	0.9727	16.66	29.89	2	1369.6	685.805	2	0.00783	5.71	0	0
AT5G01400.1	| Symbols: ESP4 | HEAT repeat-containing protein | chr5:162803-171072 REVERSE LENGTH=1467	IDDTATsENEVTEIEK	S7 Phospho	1	26.2	206.67	0.9963	30.33	31.78	2	1872.79	937.405	2	0.00669	3.57	0	0
AT5G22650.1	| Symbols: HD2B, HDT02, HDT2, ATHD2B, HDA4, HD2, ATHD2 | histone deacetylase 2B | chr5:7534120-7536054 FORWARD LENGTH=306	SPVNANQsPK	S8 Phospho	1	225.32	238.02	1	42.19	28.89	2	1120.49	561.253	2	0.000488	0.435	259	268
AT5G22650.1	| Symbols: HD2B, HDT02, HDT2, ATHD2B, HDA4, HD2, ATHD2 | histone deacetylase 2B | chr5:7534120-7536054 FORWARD LENGTH=306	AKPAAAPAStPQK	T10 Phospho	0.5	0	80.93	0.9256	10.35	29.65	2	1316.65	659.334	2	0.00353	2.68	225	237
AT1G72410.2	| Symbols: | COP1-interacting protein-related | chr1:27251535-27256246 REVERSE LENGTH=1270	LSsDVSSSEKPILR	S3 Phospho	0.5	0	134.14	0.996	25.55	30.82	2	1596.78	799.398	2	0.00481	3.01	307	320
AT1G72410.2	| Symbols: | COP1-interacting protein-related | chr1:27251535-27256246 REVERSE LENGTH=1270	NLsDLSLTDDSK	S3 Phospho	1	105.08	243.13	1	62.63	29.73	2	1386.6	694.307	2	0.00811	5.84	647	658
AT1G72410.2	| Symbols: | COP1-interacting protein-related | chr1:27251535-27256246 REVERSE LENGTH=1270	YQsEEDEDISEQKPR	S3 Phospho	1	23.2	209.39	1	62.55	30.88	2	1931.79	966.9	2	0.00645	3.34	739	753
AT1G72410.2	| Symbols: | COP1-interacting protein-related | chr1:27251535-27256246 REVERSE LENGTH=1270	LSLGGGsADFSK	S7 Phospho	1	81.39	171.71	1	60.41	29.61	2	1217.54	609.777	2	0.00547	4.49	618	629
AT1G72410.2	| Symbols: | COP1-interacting protein-related | chr1:27251535-27256246 REVERSE LENGTH=1270	SQsAHIEASFK	S3 Phospho	0.98	20.77	113.63	0.9893	18.44	29.48	2	1283.56	642.786	2	0.00289	2.25	475	485
AT1G72410.2	| Symbols: | COP1-interacting protein-related | chr1:27251535-27256246 REVERSE LENGTH=1270	VDsDISETLR	S3 Phospho	1	65.61	105.55	0.9991	22.86	29.06	2	1213.53	607.771	2	0.00443	3.65	895	904
AT1G72410.2	| Symbols: | COP1-interacting protein-related | chr1:27251535-27256246 REVERSE LENGTH=1270	YELKsDSEK	S5 Phospho	1	24.95	66.48	0.9598	13.31	29.45	2	1177.49	589.754	2	0.00233	1.98	373	381
AT1G14380.1	| Symbols: IQD28 | IQ-domain 28 | chr1:4918279-4920761 REVERSE LENGTH=664	QDDGLTLsGR	S8 Phospho	0.5	0	33.98	1	45.7	28.63	2	1140.48	571.249	2	0.00109	0.953	563	572
AT1G14380.1	| Symbols: IQD28 | IQ-domain 28 | chr1:4918279-4920761 REVERSE LENGTH=664	TAETsDKAEALK	S5 Phospho	0.5	0	69.8	0.9782	16.63	34.26	2	1342.61	672.311	2	0.00489	3.64	518	529
AT3G09560.3	| Symbols: | Lipin family protein | chr3:2934953-2938673 REVERSE LENGTH=904	FYDFQDDPPsPTSEYGSAR	S10 Phospho	1	24.95	183.92	0.9969	29.03	31	2	2257.9	753.64	3	0.0126	5.58	153	171
AT3G09560.3	| Symbols: | Lipin family protein | chr3:2934953-2938673 REVERSE LENGTH=904	LEHSLsDSGTGELR	S6 Phospho	1	50.64	195.37	1	52.88	30.79	2	1579.69	790.853	2	0.00365	2.31	120	133
AT3G09560.3	| Symbols: | Lipin family protein | chr3:2934953-2938673 REVERSE LENGTH=904	LEHSLSDsGTGELR	S8 Phospho	0.25	0	54.2	0.9342	12.27	30.92	2	1579.7	790.855	2	0.00779	4.93	120	133
AT3G63160.1	| Symbols: | FUNCTIONS IN: molecular_function unknown; INVOLVED IN: biological_process unknown; LOCATED IN: chloroplast outer membrane, thylakoid, chloroplast thylakoid membrane, chloroplast, chloroplast envelope; EXPRESSED IN: 21 plant structures; EXPRESSED DURING: 13 growth stages; BEST Arabidopsis thaliana protein match is: outer envelope membrane protein 7 (TAIR:AT3G52420.1); Has 26 Blast hit…	DKSDsDDATVPPPSGA	S5 Phospho	0.99	20.2	127.86	0.9281	10.56	29.82	2	1637.65	819.833	2	0.00493	3.01	54	69
AT3G63160.1	| Symbols: | FUNCTIONS IN: molecular_function unknown; INVOLVED IN: biological_process unknown; LOCATED IN: chloroplast outer membrane, thylakoid, chloroplast thylakoid membrane, chloroplast, chloroplast envelope; EXPRESSED IN: 21 plant structures; EXPRESSED DURING: 13 growth stages; BEST Arabidopsis thaliana protein match is: outer envelope membrane protein 7 (TAIR:AT3G52420.1); Has 26 Blast hit…	DKsDSDDATVPPPSGA	S3 Phospho	0	0	112.78	0.9926	18.72	29.82	2	1637.65	819.833	2	0.00493	3.01	54	69
AT3G63160.1	| Symbols: | FUNCTIONS IN: molecular_function unknown; INVOLVED IN: biological_process unknown; LOCATED IN: chloroplast outer membrane, thylakoid, chloroplast thylakoid membrane, chloroplast, chloroplast envelope; EXPRESSED IN: 21 plant structures; EXPRESSED DURING: 13 growth stages; BEST Arabidopsis thaliana protein match is: outer envelope membrane protein 7 (TAIR:AT3G52420.1); Has 26 Blast hit…	DKSDSDDAtVPPPSGA	T9 Phospho	0.02	0	112.71	0.9234	11.6	29.73	2	1637.65	819.832	2	0.00359	2.19	54	69
AT2G04410.1	| Symbols: | RPM1-interacting protein 4 (RIN4) family protein | chr2:1534012-1535040 REVERSE LENGTH=73	SDsPGKDEPGYNK	S3 Phospho	0.99	19.23	170.04	0.9924	29.56	33.04	2	1472.59	737.3	2	0.00337	2.29	42	54
AT2G04410.1	| Symbols: | RPM1-interacting protein 4 (RIN4) family protein | chr2:1534012-1535040 REVERSE LENGTH=73	sDSPGKDEPGYNK	S1 Phospho	0.01	0	344.24	0.9988	66.56	29.36	2	1472.59	737.301	2	0.00489	3.32	42	54
AT5G16050.1	| Symbols: GRF5, GF14 UPSILON | general regulatory factor 5 | chr5:5244008-5245402 REVERSE LENGTH=268	VDEQAQPPPsQ	S10 Phospho	1	1000	124.99	0.9895	12.93	28.52	2	1274.53	638.271	2	0.00859	6.73	258	268
AT5G16050.1	| Symbols: GRF5, GF14 UPSILON | general regulatory factor 5 | chr5:5244008-5245402 REVERSE LENGTH=268	EVQKVDEQAQPPPsQ	S14 Phospho	1	1000	64.46	0.9729	9.76	31.46	2	1758.79	880.402	2	0.00751	4.27	254	268
AT1G28280.1	| Symbols: | VQ motif-containing protein | chr1:9886652-9887395 REVERSE LENGTH=247	LLPLFPVTsPR	S9 Phospho	0.5	0	105.3	0.9961	22.13	28.59	2	1318.71	660.362	2	0.00395	2.99	227	237
AT1G28280.1	| Symbols: | VQ motif-containing protein | chr1:9886652-9887395 REVERSE LENGTH=247	EATNLIPsPR	S8 Phospho	1	98.24	137.31	0.9983	25.24	29.46	2	1176.56	589.287	2	0.00627	5.32	9	18
AT1G28280.1	| Symbols: | VQ motif-containing protein | chr1:9886652-9887395 REVERSE LENGTH=247	SGSSNQsPNELAAEEK	S7 Phospho	1	70.88	204.77	0.9993	59.26	30.54	2	1726.71	864.363	2	0.00631	3.65	188	203
AT1G68830.1	| Symbols: STN7 | STT7 homolog STN7 | chr1:25872654-25875473 REVERSE LENGTH=562	TVTEtIDEISDGR	T5 Phospho	1	48.15	235.39	1	73.61	30.23	2	1514.65	758.335	2	0.00407	2.68	537	549
AT1G68830.1	| Symbols: STN7 | STT7 homolog STN7 | chr1:25872654-25875473 REVERSE LENGTH=562	tVTETIDEISDGR	T1 Phospho	1	27.96	186.74	0.9993	58.23	30.22	2	1514.66	758.335	2	0.00561	3.7	537	549
AT1G68830.1	| Symbols: STN7 | STT7 homolog STN7 | chr1:25872654-25875473 REVERSE LENGTH=562	tVTETIDEISDGRK	T1 Phospho	1	27.96	181.19	1	60.15	30.93	2	1642.75	822.382	2	0.00363	2.21	537	550
AT1G68830.1	| Symbols: STN7 | STT7 homolog STN7 | chr1:25872654-25875473 REVERSE LENGTH=562	TVtETIDEISDGR	T3 Phospho	0.01	0	130.17	0.9918	26.89	34.32	2	1514.66	758.335	2	0.00583	3.85	537	549
AT5G66010.1	| Symbols: | RNA-binding (RRM/RBD/RNP motifs) family protein | chr5:26399612-26400753 FORWARD LENGTH=255	AsPPPTGPSR	S2 Phospho	1	98.4	128.08	1	54.95	28.97	2	1045.46	523.739	2	0.00431	4.12	143	152
AT3G62330.1	| Symbols: | Zinc knuckle (CCHC-type) family protein | chr3:23063329-23065419 REVERSE LENGTH=479	GsPQAYGSDR	S2 Phospho	1	84.46	94.6	0.999	24.95	27.1	2	1116.43	559.223	2	0.00691	6.18	257	266
AT1G12360.1	| Symbols: KEU | Sec1/munc18-like (SM) proteins superfamily | chr1:4201172-4206144 FORWARD LENGTH=666	GsDDGYSSDSVLR	S2 Phospho	1	59.15	107.94	0.9991	22.33	27.99	2	1436.55	719.281	2	0.00219	1.52	581	593
AT1G12360.1	| Symbols: KEU | Sec1/munc18-like (SM) proteins superfamily | chr1:4201172-4206144 FORWARD LENGTH=666	GSDDGYSsDSVLR	S8 Phospho	0.99	23.19	258.74	0.999	57.74	28.28	2	1436.55	719.283	2	0.00503	3.5	581	593
AT1G56080.1	| Symbols: | unknown protein; FUNCTIONS IN: molecular_function unknown; INVOLVED IN: biological_process unknown; LOCATED IN: plasma membrane; EXPRESSED IN: 12 plant structures; EXPRESSED DURING: 6 growth stages; BEST Arabidopsis thaliana protein ma	LFSGAAsPTSSHYDIR	S7 Phospho	0.98	16.54	102.84	0.9947	34.6	31.38	2	1787.79	894.901	2	-0.000112	-0.0626	0	0
AT1G56080.1	| Symbols: | unknown protein; FUNCTIONS IN: molecular_function unknown; INVOLVED IN: biological_process unknown; LOCATED IN: plasma membrane; EXPRESSED IN: 12 plant structures; EXPRESSED DURING: 6 growth stages; BEST Arabidopsis thaliana protein ma	ILSTAAsPR	S7 Phospho	1	39.33	143.58	0.9997	37.78	29.31	2	994.489	498.252	2	0.00421	4.23	0	0
AT4G11860.1	| Symbols: | Protein of unknown function (DUF544) | chr4:7134237-7138361 REVERSE LENGTH=682	sFDDSPPAAAELR	S1 Phospho	1	98.4	231.06	1	66.02	30.09	2	1454.61	728.313	2	0.00423	2.9	234	246
AT4G11860.1	| Symbols: | Protein of unknown function (DUF544) | chr4:7134237-7138361 REVERSE LENGTH=682	TRSFDDsPPAAAELR	S7 Phospho	0.33	0	131	0.9859	17.32	31.21	2	1711.76	571.595	3	0.00613	3.58	232	246
AT4G11860.1	| Symbols: | Protein of unknown function (DUF544) | chr4:7134237-7138361 REVERSE LENGTH=682	TRsFDDSPPAAAELR	S3 Phospho	0.97	18.56	205.79	0.9962	29.25	31.12	2	1711.76	571.595	3	0.00688	4.02	232	246
AT2G02170.1	| Symbols: | Remorin family protein | chr2:556595-558610 REVERSE LENGTH=486	HDSsVATAFAQPPSTAR	S4 Phospho	0.33	0	191.06	0.9957	27.36	31.8	2	1821.81	608.278	3	0.00603	3.31	245	261
AT2G02170.1	| Symbols: | Remorin family protein | chr2:556595-558610 REVERSE LENGTH=486	EDEDKDAsTSLK	S8 Phospho	1	26.2	45.54	0.9923	18.9	28.66	2	1416.57	709.294	2	0.00713	5.03	350	361
AT2G02170.1	| Symbols: | Remorin family protein | chr2:556595-558610 REVERSE LENGTH=486	TQVTSSGGGFsPGK	S11 Phospho	1	84.78	209.56	0.9989	27.01	29.74	2	1388.6	695.31	2	0.00709	5.1	9	22
AT2G02170.1	| Symbols: | Remorin family protein | chr2:556595-558610 REVERSE LENGTH=486	SFsKPAPSK	S3 Phospho	1	74.96	115.19	0.9983	24.76	28.77	2	1027.48	514.747	2	0.00565	5.49	130	138
AT2G02170.1	| Symbols: | Remorin family protein | chr2:556595-558610 REVERSE LENGTH=486	SPISSEPSsPGR	S9 Phospho	0.49	0	149.36	0.9961	24.17	29.49	2	1279.55	640.782	2	0.00575	4.49	295	306
AT2G02170.1	| Symbols: | Remorin family protein | chr2:556595-558610 REVERSE LENGTH=486	HDsSVATAFAQPPSTAR	S3 Phospho	1	55.92	307.41	0.9989	38.67	31.78	2	1821.81	911.913	2	0.00697	3.82	245	261
AT2G02170.1	| Symbols: | Remorin family protein | chr2:556595-558610 REVERSE LENGTH=486	EDEDKDASTsLK	S10 Phospho	0.33	0	23.88	0.9157	9.17	28.47	2	1416.57	709.292	2	0.00421	2.97	350	361
AT1G20670.1	| Symbols: | DNA-binding bromodomain-containing protein | chr1:7164537-7167933 REVERSE LENGTH=652	TASEIsADALIPGDSSNK	S6 Phospho	1	70.88	234.51	1	65.98	31.7	2	1854.83	928.424	2	0.00785	4.23	315	332
AT1G20670.1	| Symbols: | DNA-binding bromodomain-containing protein | chr1:7164537-7167933 REVERSE LENGTH=652	ILsPTASVSSAFIGNR	S3 Phospho	1	86.89	177.79	1	41.96	30.87	2	1698.84	850.429	2	0.00911	5.36	512	527
AT1G20670.1	| Symbols: | DNA-binding bromodomain-containing protein | chr1:7164537-7167933 REVERSE LENGTH=652	ATDILQGsPVESGPTTPLPDKK	S8 Phospho	1	67.33	215.24	0.9991	38.1	31.56	2	2330.16	777.726	3	0.0139	5.96	157	178
AT1G20670.1	| Symbols: | DNA-binding bromodomain-containing protein | chr1:7164537-7167933 REVERSE LENGTH=652	ATDILQGsPVESGPTTPLPDK	S8 Phospho	1	84.46	207.04	0.9993	49.4	32.28	2	2202.06	1102.04	2	0.012	5.47	157	177
AT1G20670.1	| Symbols: | DNA-binding bromodomain-containing protein | chr1:7164537-7167933 REVERSE LENGTH=652	QDsDDEEPQSQQQQQQQPK	S3 Phospho	1	32.73	78.75	0.9418	8.99	31.24	2	2349.94	784.321	3	0.00562	2.39	277	295
AT5G14540.1	| Symbols: | Protein of unknown function (DUF1421) | chr5:4687333-4689624 REVERSE LENGTH=547	VWDASDPKPVSASsAR	S14 Phospho	0.33	0	115.46	0.9243	11.96	31.5	2	1751.79	876.903	2	0.00439	2.5	85	100
AT1G73660.1	| Symbols: | protein tyrosine kinase family protein | chr1:27692247-27696718 REVERSE LENGTH=1030	SPsWTEGVSSPAAQR	S3 Phospho	1	24.44	284.27	0.9989	92.9	31.04	2	1638.71	820.364	2	0.00933	5.69	490	504
AT1G73660.1	| Symbols: | protein tyrosine kinase family protein | chr1:27692247-27696718 REVERSE LENGTH=1030	SIDVSSSSsPR	S9 Phospho	0.2	0	176.29	0.9969	39.46	28.81	2	1200.51	601.262	2	0.00783	6.52	64	74
AT1G73660.1	| Symbols: | protein tyrosine kinase family protein | chr1:27692247-27696718 REVERSE LENGTH=1030	SIDVSSsSSPR	S7 Phospho	0.2	0	199.06	0.998	31.84	28.92	2	1200.51	601.262	2	0.00627	5.22	64	74
AT1G69030.1	| Symbols: | BSD domain-containing protein | chr1:25947429-25949262 REVERSE LENGTH=317	DEEAKKsPGLGR	S7 Phospho	1	1000	83.81	0.9947	15.54	30.37	2	1365.63	456.217	3	0.000152	0.111	238	249
AT1G69030.1	| Symbols: | BSD domain-containing protein | chr1:25947429-25949262 REVERSE LENGTH=317	IGNsDVEEEKESNAAK	S4 Phospho	1	211.09	250.5	1	72.7	31.25	2	1798.77	900.391	2	0.00597	3.32	301	316
AT1G69030.1	| Symbols: | BSD domain-containing protein | chr1:25947429-25949262 REVERSE LENGTH=317	IGNsDVEEEK	S4 Phospho	1	1000	267.73	1	83.38	27.73	2	1198.48	600.248	2	0.00589	4.91	301	310
AT5G03630.1	| Symbols: ATMDAR2 | Pyridine nucleotide-disulphide oxidoreductase family protein | chr5:922378-924616 REVERSE LENGTH=435	AQPsVESLEVLSK	S4 Phospho	1	88.93	231.69	1	79.06	30.73	2	1465.72	733.865	2	0.00927	6.32	414	426
AT4G17890.1	| Symbols: AGD8 | ARF-GAP domain 8 | chr4:9937121-9939146 FORWARD LENGTH=413	sISSAQYFGDQNK	S1 Phospho	1	46.21	179.8	0.9988	28.85	29.96	2	1523.64	762.825	2	0.00581	3.81	318	330
AT4G17890.1	| Symbols: AGD8 | ARF-GAP domain 8 | chr4:9937121-9939146 FORWARD LENGTH=413	SSAGSsFASR	S6 Phospho	0.98	23.19	100.96	0.9983	40.55	26.8	2	1035.41	518.711	2	0.00565	5.45	240	249
AT2G39130.1	| Symbols: | Transmembrane amino acid transporter family protein | chr2:16323171-16326744 REVERSE LENGTH=550	LSSQGLLSPIPsR	S12 Phospho	0.25	0	24.09	0.9966	13.41	30.26	2	1433.73	717.875	2	0.00689	4.8	125	137
AT2G39130.1	| Symbols: | Transmembrane amino acid transporter family protein | chr2:16323171-16326744 REVERSE LENGTH=550	LSsQGLLSPIPSR	S3 Phospho	1	27.96	136.9	0.9954	45.89	30.15	2	1433.74	717.876	2	0.0102	7.09	125	137
AT2G39130.1	| Symbols: | Transmembrane amino acid transporter family protein | chr2:16323171-16326744 REVERSE LENGTH=550	LSSQGLLsPIPSR	S8 Phospho	1	53.49	134.83	0.9987	28.5	30	2	1433.74	717.875	2	0.00795	5.54	125	137
AT1G30480.1	| Symbols: DRT111 | D111/G-patch domain-containing protein | chr1:10790315-10792423 FORWARD LENGTH=387	SSsPPGNVDGFSIGK	S3 Phospho	0.99	21.95	209.23	0.9984	59.85	30.56	2	1527.66	764.84	2	0.00393	2.57	187	201
AT2G32700.7	| Symbols: LUH | LEUNIG_homolog | chr2:13867235-13871844 FORWARD LENGTH=806	TEVNLGTsPR	S8 Phospho	0.5	0	222.81	0.9988	48.43	29.55	2	1152.52	577.268	2	0.00343	2.97	204	213
AT3G58640.2	| Symbols: | Mitogen activated protein kinase kinase kinase-related | chr3:21687153-21692675 REVERSE LENGTH=809	LDGSPNTSGPPsR	S12 Phospho	1	37.49	81.48	0.9995	45.33	30.04	2	1363.58	682.799	2	0.00699	5.12	309	321
AT3G58640.2	| Symbols: | Mitogen activated protein kinase kinase kinase-related | chr3:21687153-21692675 REVERSE LENGTH=809	KLDGSPNTSGPPsR	S13 Phospho	0.33	0	104.44	0.9985	34.41	30.35	2	1491.68	746.846	2	0.00571	3.82	308	321
AT3G58640.2	| Symbols: | Mitogen activated protein kinase kinase kinase-related | chr3:21687153-21692675 REVERSE LENGTH=809	sISITPEIGDDIVR	S1 Phospho	0	0	177.32	0.9971	37.49	30.73	2	1593.77	797.891	2	0.00275	1.72	416	429
AT3G58640.2	| Symbols: | Mitogen activated protein kinase kinase kinase-related | chr3:21687153-21692675 REVERSE LENGTH=809	EQGDDDSSPNsPNDR	S11 Phospho	1	26.2	69.31	0.989	15.51	26.67	2	1711.6	856.808	2	0.00441	2.57	446	460
AT3G58640.2	| Symbols: | Mitogen activated protein kinase kinase kinase-related | chr3:21687153-21692675 REVERSE LENGTH=809	TASSsPEHLSFR	S5 Phospho	0.33	0	122.08	0.9941	27.17	30.17	2	1397.6	699.807	2	0.00223	1.59	362	373
AT3G58640.2	| Symbols: | Mitogen activated protein kinase kinase kinase-related | chr3:21687153-21692675 REVERSE LENGTH=809	TASSSPEHLsFR	S10 Phospho	0.95	18.81	52.81	0.9411	11.53	30.11	2	1397.6	699.809	2	0.00637	4.55	362	373
AT3G58640.2	| Symbols: | Mitogen activated protein kinase kinase kinase-related | chr3:21687153-21692675 REVERSE LENGTH=809	SIsITPEIGDDIVR	S3 Phospho	1	24.44	137.8	0.9989	43.04	30.68	2	1593.77	797.893	2	0.00651	4.08	416	429
AT3G20550.1	| Symbols: DDL | SMAD/FHA domain-containing protein | chr3:7174695-7177600 REVERSE LENGTH=314	GGsEEPNVEEDSVAR	S3 Phospho	1	292.6	294.5	0.9994	96.03	29.64	2	1653.66	827.836	2	0.00505	3.05	0	0
AT3G20550.1	| Symbols: DDL | SMAD/FHA domain-containing protein | chr3:7174695-7177600 REVERSE LENGTH=314	TYINEsPIEPQR	S6 Phospho	1	23.99	72.51	0.998	21.19	30.73	2	1525.68	763.849	2	0.00251	1.64	0	0
AT1G24160.2	| Symbols: | unknown protein; FUNCTIONS IN: molecular_function unknown; INVOLVED IN: biological_process unknown; LOCATED IN: cellular_component unknown; EXPRESSED IN: guard cell; BEST Arabidopsis thaliana protein match is: unknown protein (TAIR:AT1	SsVDGLNTAVK	S2 Phospho	0.5	0	131.65	0.9986	36.53	30.02	2	1169.54	585.776	2	0.00347	2.96	0	0
AT1G24160.2	| Symbols: | unknown protein; FUNCTIONS IN: molecular_function unknown; INVOLVED IN: biological_process unknown; LOCATED IN: cellular_component unknown; EXPRESSED IN: guard cell; BEST Arabidopsis thaliana protein match is: unknown protein (TAIR:AT1	cAtPGSVAQK	T3 Phospho	1	105.08	152.34	1	44.11	28.11	2	1097.46	549.738	2	0.00382	3.48	0	0
AT1G24160.2	| Symbols: | unknown protein; FUNCTIONS IN: molecular_function unknown; INVOLVED IN: biological_process unknown; LOCATED IN: cellular_component unknown; EXPRESSED IN: guard cell; BEST Arabidopsis thaliana protein match is: unknown protein (TAIR:AT1	sPQGFATPR	S1 Phospho	1	84.93	102.1	0.9985	13.63	28.81	2	1039.45	520.734	2	0.00395	3.79	0	0
AT1G24160.2	| Symbols: | unknown protein; FUNCTIONS IN: molecular_function unknown; INVOLVED IN: biological_process unknown; LOCATED IN: cellular_component unknown; EXPRESSED IN: guard cell; BEST Arabidopsis thaliana protein match is: unknown protein (TAIR:AT1	FSAFsPNK	S5 Phospho	1	105.08	120.5	0.99	26.38	28.94	2	976.408	489.211	2	0.00255	2.61	0	0
AT1G24160.2	| Symbols: | unknown protein; FUNCTIONS IN: molecular_function unknown; INVOLVED IN: biological_process unknown; LOCATED IN: cellular_component unknown; EXPRESSED IN: guard cell; BEST Arabidopsis thaliana protein match is: unknown protein (TAIR:AT1	DDIsLQNDTVDANETTK	S4 Phospho	1	45.42	81.22	0.9989	17.59	31.69	2	1957.82	979.919	2	0.00815	4.16	0	0
AT1G24160.2	| Symbols: | unknown protein; FUNCTIONS IN: molecular_function unknown; INVOLVED IN: biological_process unknown; LOCATED IN: cellular_component unknown; EXPRESSED IN: guard cell; BEST Arabidopsis thaliana protein match is: unknown protein (TAIR:AT1	TSLsTSHSSLK	S4 Phospho	0.99	27.96	91.78	0.9533	9.33	33.87	2	1226.56	614.287	2	0.00441	3.59	0	0
AT5G18230.2	| Symbols: | transcription regulator NOT2/NOT3/NOT5 family protein | chr5:6021610-6027031 REVERSE LENGTH=845	SIsLPTHHQEK	S3 Phospho	1	24.44	166.03	0.9991	46.75	30.42	2	1355.63	678.821	2	0.00479	3.53	273	283
AT5G18230.2	| Symbols: | transcription regulator NOT2/NOT3/NOT5 family protein | chr5:6021610-6027031 REVERSE LENGTH=845	SSLAASAsQVR	S8 Phospho	0.99	19.53	118.99	0.9974	21.91	29.68	2	1155.53	578.773	2	0.00317	2.74	262	272
AT4G12770.1	| Symbols: | Chaperone DnaJ-domain superfamily protein | chr4:7506736-7511408 REVERSE LENGTH=891	IPSTSSQsAR	S8 Phospho	0.2	0	118.83	0.9941	52.37	28.73	2	1112.49	557.25	2	-0.000412	-0.37	133	142
AT4G12770.1	| Symbols: | Chaperone DnaJ-domain superfamily protein | chr4:7506736-7511408 REVERSE LENGTH=891	FENVFSSISSsPTK	S11 Phospho	0.99	26.2	329.85	0.9987	67.27	31.36	2	1608.71	805.364	2	0.00717	4.45	143	156
AT3G45190.1	| Symbols: | SIT4 phosphatase-associated family protein | chr3:16541994-16548161 REVERSE LENGTH=789	sPPVPSLFGK	S1 Phospho	1	81.16	92.58	1	32.54	29.25	2	1107.54	554.777	2	0.00355	3.2	712	721
AT3G50370.1	| Symbols: | unknown protein; FUNCTIONS IN: molecular_function unknown; INVOLVED IN: biological_process unknown; LOCATED IN: cellular_component unknown; EXPRESSED IN: 26 plant structures; EXPRESSED DURING: 15 growth stages; Has 27734 Blast hits to 16708 proteins in 1259 species: Archae - 81; Bacteria - 3434; Metazoa - 10876; Fungi - 2514; Plants - 987; Viruses - 212; Other Eukaryotes - 9630 (sour…	SSLTQVRPVsGGGR	S10 Phospho	1	115.34	89.13	0.9695	16.82	30.5	2	1479.72	740.868	2	0.00231	1.56	280	293
AT3G50370.1	| Symbols: | unknown protein; FUNCTIONS IN: molecular_function unknown; INVOLVED IN: biological_process unknown; LOCATED IN: cellular_component unknown; EXPRESSED IN: 26 plant structures; EXPRESSED DURING: 15 growth stages; Has 27734 Blast hits to 16708 proteins in 1259 species: Archae - 81; Bacteria - 3434; Metazoa - 10876; Fungi - 2514; Plants - 987; Viruses - 212; Other Eukaryotes - 9630 (sour…	QTLAPIGTPsPK	S10 Phospho	1	27.96	115.59	0.9933	16.77	29.77	2	1288.65	645.331	2	0.00433	3.36	1519	1530
AT3G50370.1	| Symbols: | unknown protein; FUNCTIONS IN: molecular_function unknown; INVOLVED IN: biological_process unknown; LOCATED IN: cellular_component unknown; EXPRESSED IN: 26 plant structures; EXPRESSED DURING: 15 growth stages; Has 27734 Blast hits to 16708 proteins in 1259 species: Archae - 81; Bacteria - 3434; Metazoa - 10876; Fungi - 2514; Plants - 987; Viruses - 212; Other Eukaryotes - 9630 (sour…	DGsFGFPDR	S3 Phospho	1	1000	96.29	0.9994	20.16	25.88	2	1076.4	539.207	2	0.00351	3.26	623	631
AT3G50370.1	| Symbols: | unknown protein; FUNCTIONS IN: molecular_function unknown; INVOLVED IN: biological_process unknown; LOCATED IN: cellular_component unknown; EXPRESSED IN: 26 plant structures; EXPRESSED DURING: 15 growth stages; Has 27734 Blast hits to 16708 proteins in 1259 species: Archae - 81; Bacteria - 3434; Metazoa - 10876; Fungi - 2514; Plants - 987; Viruses - 212; Other Eukaryotes - 9630 (sour…	NPLsPNSGQANLK	S4 Phospho	1	65.61	198.5	1	50.38	30.93	2	1418.66	710.337	2	0.00393	2.77	1403	1415
AT5G52310.1	| Symbols: COR78, LTI78, RD29A, LTI140 | low-temperature-responsive protein 78 (LTI78) / desiccation-responsive protein 29A (RD29A) | chr5:21240929-21243326 FORWARD LENGTH=710	AAsEEGEAVEEEVK	S3 Phospho	1	1000	254.02	0.9994	95.05	30	2	1555.63	778.824	2	0.00467	3	624	637
AT2G21660.1	| Symbols: ATGRP7, CCR2, GR-RBP7, GRP7 | cold, circadian rhythm, and rna binding 2 | chr2:9265477-9266316 REVERSE LENGTH=176	SGGGGGYSGGGGsYGGGGGR	S13 Phospho	1	24.95	169.4	1	36.94	27.5	2	1639.61	820.81	2	0.00387	2.36	105	124
AT2G21660.1	| Symbols: ATGRP7, CCR2, GR-RBP7, GRP7 | cold, circadian rhythm, and rna binding 2 | chr2:9265477-9266316 REVERSE LENGTH=176	EGGGGYSGGGGGYSsR	S15 Phospho	0.2	0	50.76	0.9474	14.79	27.57	2	1483.54	742.777	2	0.00233	1.57	126	141
AT2G21660.1	| Symbols: ATGRP7, CCR2, GR-RBP7, GRP7 | cold, circadian rhythm, and rna binding 2 | chr2:9265477-9266316 REVERSE LENGTH=176	SGGGGGYsGGGGSYGGGGGR	S8 Phospho	0.41	26.98	183.77	0.9989	70.05	27.54	2	1639.61	820.811	2	0.00487	2.97	105	124
AT2G21660.1	| Symbols: ATGRP7, CCR2, GR-RBP7, GRP7 | cold, circadian rhythm, and rna binding 2 | chr2:9265477-9266316 REVERSE LENGTH=176	sGGGGGYSGGGGSYGGGGGR	S1 Phospho	1	121.86	352.08	0.9989	163.3	27.49	2	1639.61	820.811	2	0.00511	3.11	105	124
AT2G21660.1	| Symbols: ATGRP7, CCR2, GR-RBP7, GRP7 | cold, circadian rhythm, and rna binding 2 | chr2:9265477-9266316 REVERSE LENGTH=176	EGGGGYSGGGGGYsSR	S14 Phospho	0.25	0	57.88	0.9977	22.87	27.54	2	1483.54	742.778	2	0.00515	3.47	126	141
AT5G07350.1	| Symbols: Tudor1, AtTudor1, TSN1 | TUDOR-SN protein 1 | chr5:2320344-2324892 REVERSE LENGTH=991	IGIWQYGDIEsDDEDTGPAR	S11 Phospho	1	20.99	195.25	1	83.55	32.53	2	2315.97	772.998	3	0.014	6.06	965	984
AT5G06560.1	| Symbols: | Protein of unknown function, DUF593 | chr5:2003678-2005543 REVERSE LENGTH=518	NPsFTQPTGDVSGGR	S3 Phospho	1	116.83	232.4	1	50.7	30.35	2	1598.68	800.346	2	0.00535	3.34	255	269
AT5G06560.1	| Symbols: | Protein of unknown function, DUF593 | chr5:2003678-2005543 REVERSE LENGTH=518	NVVGQsPR	S6 Phospho	1	1000	116.15	0.99	13.66	27.37	2	935.426	468.72	2	0.00343	3.66	275	282
AT1G57990.1	| Symbols: ATPUP18, PUP18 | purine permease 18 | chr1:21441700-21442872 REVERSE LENGTH=390	QTTAEGSANPEPDQILsPR	S17 Phospho	1	158.69	221.85	1	40.27	32.14	2	2089.94	1045.98	2	0.0106	5.09	9	27
AT3G19950.1	| Symbols: | RING/U-box superfamily protein | chr3:6942853-6943839 FORWARD LENGTH=328	SQGSQGSGDGQGSVEGQQtPR	T19 Phospho	1	140.92	357.19	1	92.27	31.41	2	2125.87	1063.94	2	0.00715	3.36	0	0
AT1G44910.1	| Symbols: ATPRP40A, PRP40A | pre-mRNA-processing protein 40A | chr1:16975930-16982818 FORWARD LENGTH=958	ANLsPAGDK	S4 Phospho	1	1000	128.16	1	42.43	26	2	951.411	476.713	2	0.00433	4.54	384	392
AT2G32910.1	| Symbols: | DCD (Development and Cell Death) domain protein | chr2:13959685-13961989 FORWARD LENGTH=691	NsPDPPDSAVTLDSYR	S2 Phospho	0.98	17.21	102.26	0.991	22.4	30.93	2	1812.77	605.263	3	0.0106	5.86	598	613
AT2G32910.1	| Symbols: | DCD (Development and Cell Death) domain protein | chr2:13959685-13961989 FORWARD LENGTH=691	DVGAsPGGNLIVAK	S5 Phospho	1	1000	106.39	0.9838	11.63	33.94	2	1376.67	689.344	2	0.00387	2.81	233	246
AT3G02880.1	| Symbols: | Leucine-rich repeat protein kinase family protein | chr3:634819-636982 FORWARD LENGTH=627	LIEEVSHSSGsPNPVSD	S11 Phospho	1	54.16	266.54	0.9991	55.33	31.54	2	1832.79	917.402	2	0.00605	3.3	611	627
AT3G02880.1	| Symbols: | Leucine-rich repeat protein kinase family protein | chr3:634819-636982 FORWARD LENGTH=627	LIEEVSHSSGSPNPVsD	S16 Phospho	0	25.53	197.97	0.9988	43.22	31.49	2	1832.79	917.401	2	0.00537	2.93	611	627
AT1G76850.1	| Symbols: SEC5A | exocyst complex component sec5 | chr1:28848013-28854282 FORWARD LENGTH=1090	VALTSLQsLPR	S8 Phospho	1	27.96	311.41	0.9994	80.53	29	2	1263.67	632.84	2	0.00659	5.21	173	183
AT1G76850.1	| Symbols: SEC5A | exocyst complex component sec5 | chr1:28848013-28854282 FORWARD LENGTH=1090	LITESSGsPSK	S8 Phospho	0.99	23.2	201.07	0.9987	57.13	29.45	2	1184.54	593.276	2	0.00573	4.83	203	213
AT1G76850.1	| Symbols: SEC5A | exocyst complex component sec5 | chr1:28848013-28854282 FORWARD LENGTH=1090	LITESSGsPSKAEK	S8 Phospho	0.25	0	124.58	0.9895	17.96	30.61	2	1512.71	757.364	2	0.00653	4.31	203	216
AT3G10380.1	| Symbols: SEC8, ATSEC8 | subunit of exocyst complex 8 | chr3:3219922-3228356 REVERSE LENGTH=1053	ASQHDINtPR	T8 Phospho	1	40.49	48.62	0.9581	8.49	29	2	1217.52	406.848	3	0.00361	2.96	475	484
AT1G32490.1	| Symbols: EMB2733, ESP3 | RNA helicase family protein | chr1:11742356-11749286 REVERSE LENGTH=1044	SGQsDESDGEVAVR	S4 Phospho	1	44	206.17	0.9979	80.47	29.27	2	1514.6	758.306	2	0.00943	6.22	132	145
AT1G32490.1	| Symbols: EMB2733, ESP3 | RNA helicase family protein | chr1:11742356-11749286 REVERSE LENGTH=1044	SGQSDEsDGEVAVR	S7 Phospho	1	70.88	236.86	1	66.07	29.28	2	1514.6	758.306	2	0.00791	5.22	132	145
AT2G28290.1	| Symbols: SYD, CHR3 | P-loop containing nucleoside triphosphate hydrolases superfamily protein | chr2:12056771-12072950 FORWARD LENGTH=3574	LcQTESPDsPQGK	S9 Phospho	1	50.19	245.59	1	53.71	29.66	2	1525.62	763.815	2	0.00388	2.54	1380	1392
AT2G28290.1	| Symbols: SYD, CHR3 | P-loop containing nucleoside triphosphate hydrolases superfamily protein | chr2:12056771-12072950 FORWARD LENGTH=3574	SFDRESPsNLDSTSGISQPHNR	S8 Phospho	0.25	0	201.45	0.9859	23.95	32.63	2	2510.09	837.703	3	0.00327	1.3	149	170
AT2G28290.1	| Symbols: SYD, CHR3 | P-loop containing nucleoside triphosphate hydrolases superfamily protein | chr2:12056771-12072950 FORWARD LENGTH=3574	ANEGSTSNPDQVsPVHSATTALR	S13 Phospho	1	37.11	149.88	0.9957	17.85	32.69	2	2418.09	807.038	3	0.0101	4.18	1595	1617
AT5G53620.2	| Symbols: | unknown protein; INVOLVED IN: biological_process unknown; EXPRESSED IN: 23 plant structures; EXPRESSED DURING: 13 growth stages; Has 30201 Blast hits to 17322 proteins in 780 species: Archae - 12; Bacteria - 1396; Metazoa - 17338; Fungi - 3422; Plants - 5037; Viruses - 0; Other Eukaryotes - 2996 (source: NCBI BLink). | chr5:21781217-21785061 FORWARD LENGTH=682	sADNISSFTSTDDK	S1 Phospho	1	107.02	139.85	0.9991	25.96	29.23	2	1566.62	784.316	2	0.00919	5.86	341	354
AT5G53620.2	| Symbols: | unknown protein; INVOLVED IN: biological_process unknown; EXPRESSED IN: 23 plant structures; EXPRESSED DURING: 13 growth stages; Has 30201 Blast hits to 17322 proteins in 780 species: Archae - 12; Bacteria - 1396; Metazoa - 17338; Fungi - 3422; Plants - 5037; Viruses - 0; Other Eukaryotes - 2996 (source: NCBI BLink). | chr5:21781217-21785061 FORWARD LENGTH=682	GGsLQNPSPTAPSR	S3 Phospho	1	107.02	139.8	0.9994	25.95	31.03	2	1447.65	724.833	2	0.00591	4.08	13	26
AT5G53620.2	| Symbols: | unknown protein; INVOLVED IN: biological_process unknown; EXPRESSED IN: 23 plant structures; EXPRESSED DURING: 13 growth stages; Has 30201 Blast hits to 17322 proteins in 780 species: Archae - 12; Bacteria - 1396; Metazoa - 17338; Fungi - 3422; Plants - 5037; Viruses - 0; Other Eukaryotes - 2996 (source: NCBI BLink). | chr5:21781217-21785061 FORWARD LENGTH=682	GGSLQNPsPTAPSR	S8 Phospho	1	44.63	253.77	0.999	49.87	30.99	2	1447.65	724.833	2	0.00613	4.23	13	26
AT1G13930.2	| Symbols: | Involved in response to salt stress. Knockout mutants are hypersensitive to salt stress. | chr1:4761091-4761558 FORWARD LENGTH=155	SsTGQYLDK	S2 Phospho	0.99	24.95	131.07	0.9962	21.24	28.4	2	1077.44	539.728	2	0.00419	3.88	88	96
AT1G13930.2	| Symbols: | Involved in response to salt stress. Knockout mutants are hypersensitive to salt stress. | chr1:4761091-4761558 FORWARD LENGTH=155	VAGAsADILDAAEK	S5 Phospho	1	1000	256.9	1	81.54	30.56	2	1409.65	705.831	2	0.00397	2.81	67	80
AT1G13930.2	| Symbols: | Involved in response to salt stress. Knockout mutants are hypersensitive to salt stress. | chr1:4761091-4761558 FORWARD LENGTH=155	FDEKsSTGQYLDK	S5 Phospho	1	27.96	235.5	0.9983	39.93	30.64	2	1596.67	799.344	2	0.00329	2.06	84	96
AT1G13930.2	| Symbols: | Involved in response to salt stress. Knockout mutants are hypersensitive to salt stress. | chr1:4761091-4761558 FORWARD LENGTH=155	YLNDYESSHStGAGGPPPPTSQAEPASQPEPAAK	T11 Phospho	0.17	0	179.98	0.9964	41.73	33.79	2	3517.54	1173.52	3	0.00857	2.44	100	133
AT1G13930.2	| Symbols: | Involved in response to salt stress. Knockout mutants are hypersensitive to salt stress. | chr1:4761091-4761558 FORWARD LENGTH=155	KDDEEsGGGLGGYAK	S6 Phospho	1	139.37	294.87	1	65.43	29.8	2	1561.63	781.825	2	0.00453	2.9	134	148
AT1G13930.2	| Symbols: | Involved in response to salt stress. Knockout mutants are hypersensitive to salt stress. | chr1:4761091-4761558 FORWARD LENGTH=155	SStGQYLDK	T3 Phospho	0.99	23.19	84.64	0.9342	11.64	28.74	2	1077.44	539.729	2	0.00605	5.61	88	96
AT4G31700.1	| Symbols: RPS6, RPS6A | ribosomal protein S6 | chr4:15346306-15347714 REVERSE LENGTH=250	SRLsSAAAKPSVTA	S4 Phospho	1	45.93	193.87	0.9983	31.09	30.34	2	1424.71	713.361	2	0.00559	3.92	237	250
AT4G31700.1	| Symbols: RPS6, RPS6A | ribosomal protein S6 | chr4:15346306-15347714 REVERSE LENGTH=250	LsSAAAKPSVTA	S2 Phospho	1	49.9	139.7	0.9989	37.57	30.38	2	1181.57	591.794	2	0.00365	3.08	239	250
AT4G31700.1	| Symbols: RPS6, RPS6A | ribosomal protein S6 | chr4:15346306-15347714 REVERSE LENGTH=250	ISQEVsGDALGEEFK	S6 Phospho	1	86.37	171.55	0.9974	32.93	30.94	2	1687.74	844.879	2	0.00935	5.54	32	46
AT4G31700.1	| Symbols: RPS6, RPS6A | ribosomal protein S6 | chr4:15346306-15347714 REVERSE LENGTH=250	LSSAAAKPsVTA	S9 Phospho	1	24.95	164.93	0.997	20.56	30.17	2	1181.57	591.794	2	0.00441	3.73	239	250
AT2G38280.1	| Symbols: FAC1, ATAMPD | AMP deaminase, putative / myoadenylate deaminase, putative | chr2:16033767-16038793 REVERSE LENGTH=839	EVISDPStPKPNTEPFAHYPQGK	T8 Phospho	0.33	0	241.8	0.9945	30.77	32.96	2	2618.21	873.745	3	0.00846	3.23	273	295
AT2G38280.1	| Symbols: FAC1, ATAMPD | AMP deaminase, putative / myoadenylate deaminase, putative | chr2:16033767-16038793 REVERSE LENGTH=839	SPAsLPDATPFTDGGGGGGGDTGR	S4 Phospho	0.5	0	94.1	0.9972	32.8	31.83	2	2225.93	1113.97	2	0.00465	2.09	73	96
AT2G38280.1	| Symbols: FAC1, ATAMPD | AMP deaminase, putative / myoadenylate deaminase, putative | chr2:16033767-16038793 REVERSE LENGTH=839	ASVHGASsIR	S8 Phospho	0.5	0	108.14	0.9963	23.01	28.09	2	1063.48	532.75	2	0.00355	3.33	121	130
AT2G38280.1	| Symbols: FAC1, ATAMPD | AMP deaminase, putative / myoadenylate deaminase, putative | chr2:16033767-16038793 REVERSE LENGTH=839	sPASLPDATPFTDGGGGGGGDTGR	S1 Phospho	1	39.33	113.18	0.9947	24.28	31.83	2	2225.93	1113.97	2	0.0108	4.87	73	96
AT2G38280.1	| Symbols: FAC1, ATAMPD | AMP deaminase, putative / myoadenylate deaminase, putative | chr2:16033767-16038793 REVERSE LENGTH=839	AsVHGASSIR	S2 Phospho	1	72.13	61.35	0.9707	9.12	28.18	2	1063.49	532.75	2	0.00467	4.39	121	130
AT2G38280.1	| Symbols: FAC1, ATAMPD | AMP deaminase, putative / myoadenylate deaminase, putative | chr2:16033767-16038793 REVERSE LENGTH=839	TGsFVRPISPK	S3 Phospho	0.97	18.44	68.02	0.9179	9.82	30.1	2	1267.64	634.826	2	0.00513	4.04	132	142
AT4G28990.1	| Symbols: | RNA-binding protein-related | chr4:14291205-14293018 FORWARD LENGTH=347	YAPANsPPLPR	S6 Phospho	1	88.65	134.7	0.9996	29.42	30.2	2	1261.59	631.803	2	0.00525	4.16	184	194
AT4G28990.1	| Symbols: | RNA-binding protein-related | chr4:14291205-14293018 FORWARD LENGTH=347	RPPLsPPR	S5 Phospho	1	1000	106.56	0.99	30.95	27.75	2	998.511	500.263	2	0.00423	4.23	271	278
AT2G41740.1	| Symbols: VLN2, ATVLN2 | villin 2 | chr2:17410962-17416878 REVERSE LENGTH=976	STSsNPADDIPLTEAK	S4 Phospho	0.5	0	257.97	0.9973	73.62	31.2	2	1724.76	863.388	2	0.0103	5.98	855	870
AT2G41740.1	| Symbols: VLN2, ATVLN2 | villin 2 | chr2:17410962-17416878 REVERSE LENGTH=976	EEEEVsPAADETEAK	S6 Phospho	1	156.18	229.4	1	67.63	29.52	2	1712.68	857.346	2	0.0102	5.96	885	899
AT2G41740.1	| Symbols: VLN2, ATVLN2 | villin 2 | chr2:17410962-17416878 REVERSE LENGTH=976	sPPPPRPVGTSQASQR	S1 Phospho	1	82.2	89.91	0.9837	12.09	31.34	2	1740.84	581.286	3	0.00487	2.8	813	828
AT2G41740.1	| Symbols: VLN2, ATVLN2 | villin 2 | chr2:17410962-17416878 REVERSE LENGTH=976	STsSNPADDIPLTEAK	S3 Phospho	0	0	299.45	0.9975	87.18	31.08	2	1724.75	863.385	2	0.00419	2.43	855	870
AT1G09730.1	| Symbols: | Cysteine proteinases superfamily protein | chr1:3148017-3154236 REVERSE LENGTH=963	FTNPsPcNSPVLQR	S5 Phospho	1	40.66	132.17	0.9832	22.74	31.06	2	1695.73	848.872	2	-0.0138	-8.13	28	41
AT3G04120.1	| Symbols: GAPC, GAPC-1, GAPC1 | glyceraldehyde-3-phosphate dehydrogenase C subunit 1 | chr3:1081077-1083131 FORWARD LENGTH=338	AAsFNIIPSSTGAAK	S3 Phospho	1	179.15	149.28	0.9994	29.65	31.2	2	1513.73	757.87	2	0.00737	4.86	205	219
AT3G04120.1	| Symbols: GAPC, GAPC-1, GAPC1 | glyceraldehyde-3-phosphate dehydrogenase C subunit 1 | chr3:1081077-1083131 FORWARD LENGTH=338	AASFNIIPSStGAAK	T11 Phospho	0.33	0	147.43	0.9953	21.5	31.12	2	1513.72	757.869	2	0.00593	3.91	205	219
AT3G04120.1	| Symbols: GAPC, GAPC-1, GAPC1 | glyceraldehyde-3-phosphate dehydrogenase C subunit 1 | chr3:1081077-1083131 FORWARD LENGTH=338	AASFNIIPSsTGAAK	S10 Phospho	0.98	20.98	147.15	0.9871	17.88	31.09	2	1513.72	757.869	2	0.00523	3.45	205	219
AT4G28610.1	| Symbols: PHR1, AtPHR1 | phosphate starvation response 1 | chr4:14133164-14134951 REVERSE LENGTH=409	YRPEPSETGsPER	S10 Phospho	0.33	0	137.67	0.9822	17.29	30.45	2	1583.67	792.84	2	0.00415	2.62	282	294
AT4G28610.1	| Symbols: PHR1, AtPHR1 | phosphate starvation response 1 | chr4:14133164-14134951 REVERSE LENGTH=409	cEELEsPQPK	S6 Phospho	1	1000	147.58	0.9962	17.11	28.37	2	1295.52	648.767	2	0.00892	6.88	394	403
AT4G28610.1	| Symbols: PHR1, AtPHR1 | phosphate starvation response 1 | chr4:14133164-14134951 REVERSE LENGTH=409	KcEELEsPQPK	S7 Phospho	1	1000	280.9	1	43.38	30.1	2	1423.61	712.812	2	0.0037	2.6	393	403
AT4G28610.1	| Symbols: PHR1, AtPHR1 | phosphate starvation response 1 | chr4:14133164-14134951 REVERSE LENGTH=409	YRPEPSETGsPERK	S10 Phospho	1	39.54	107.39	0.995	24.22	31.12	2	1711.76	571.594	3	0.00328	1.92	282	295
AT3G13290.1	| Symbols: VCR | varicose-related | chr3:4297529-4303113 FORWARD LENGTH=1340	TLSYPTPPLNPQsPR	S13 Phospho	1	58.32	140.91	0.9993	25.65	31.38	2	1746.84	874.429	2	0.00823	4.71	79	93
AT3G13290.1	| Symbols: VCR | varicose-related | chr3:4297529-4303113 FORWARD LENGTH=1340	TSsADYFYVR	S3 Phospho	1	44.63	167.04	0.9978	30.32	28.66	2	1287.53	644.77	2	0.00783	6.08	678	687
AT3G13290.1	| Symbols: VCR | varicose-related | chr3:4297529-4303113 FORWARD LENGTH=1340	LPESGSSSGLVATNsK	S15 Phospho	0.5	0	138.72	0.9629	16.71	31.09	2	1612.74	807.38	2	0.00985	6.1	862	877
AT3G13290.1	| Symbols: VCR | varicose-related | chr3:4297529-4303113 FORWARD LENGTH=1340	LPEsGSSSGLVATNSK	S4 Phospho	0.25	0	145.82	0.9953	21.47	30.97	2	1612.74	807.377	2	0.00473	2.93	862	877
AT3G13290.1	| Symbols: VCR | varicose-related | chr3:4297529-4303113 FORWARD LENGTH=1340	LPESGsSSGLVATNSK	S6 Phospho	0.25	0	144.11	0.9985	35	31.02	2	1612.74	807.376	2	0.00347	2.15	862	877
AT1G79090.1	| Symbols: | FUNCTIONS IN: molecular_function unknown; INVOLVED IN: biological_process unknown; LOCATED IN: cellular_component unknown; EXPRESSED IN: 25 plant structures; EXPRESSED DURING: 15 growth stages; CONTAINS InterPro DOMAIN/s: Topoisomerase II-associated protein PAT1 (InterPro:IPR019167); BEST Arabidopsis thaliana protein match is: Topoisomerase II-associated protein PAT1 (TAIR:AT3G22270.…	SSFVSYPPPGSIsPDQR	S13 Phospho	0.48	0	104.8	0.948	16.01	31.91	2	1899.85	950.933	2	0.0112	5.92	196	212
AT3G50500.1	| Symbols: SPK-2-2, SNRK2-2, SNRK2.2, SRK2D | SNF1-related protein kinase 2.2 | chr3:18741805-18743904 REVERSE LENGTH=362	SSVLHsQPK	S6 Phospho	1	162.62	149.19	0.9992	21.16	29.55	2	1061.49	531.754	2	0.00239	2.25	168	176
AT3G50500.1	| Symbols: SPK-2-2, SNRK2-2, SNRK2.2, SRK2D | SNF1-related protein kinase 2.2 | chr3:18741805-18743904 REVERSE LENGTH=362	StVGTPAYIAPEILLR	T2 Phospho	0.49	0	132.52	0.9983	47.26	29.64	2	1779.92	890.968	2	0.00387	2.17	177	192
AT3G63400.3	| Symbols: | Cyclophilin-like peptidyl-prolyl cis-trans isomerase family protein | chr3:23412449-23415435 FORWARD LENGTH=570	NFSPGDVsDR	S8 Phospho	1	45.42	102.7	0.9996	26.48	27.26	2	1172.45	587.235	2	0.00467	3.98	197	206
AT3G63400.3	| Symbols: | Cyclophilin-like peptidyl-prolyl cis-trans isomerase family protein | chr3:23412449-23415435 FORWARD LENGTH=570	VDNADQHANLDDSVKsR	S16 Phospho	0.5	0	89.82	0.9995	41.76	31.37	2	1962.85	982.432	2	0.00525	2.67	325	341
[truncated: 1,983 more rows]

## Sheet: P0.5-Ti-40-lactic acid
protein accession	protein name	Peptide Sequence	Variable Modifications	Localization Probability	Ascore	Peptide Score	Mascot:Score	Scaffold:Peptide Probability	Mascot:Identity Threshold	NTT	Actual Mass	Observed Mass	Charge	Delta AMU	Delta PPM	Start	Stop
[truncated: 3,850 more rows]

[truncated: 3 more sheets: P0.5-Ti-40-glycolic acid, P0.5-Ti-50-lactic acid, P0.5-Ti-50-glycolic acid]
